# Supplementary material for: Pyrosequencing of Haliotis diversicolor Transcriptomes: Insights into Early Developmental Molluscan Gene Expression
Source: PLoS One. 2012 Dec 7;7(12):e51279. doi: 10.1371/journal.pone.0051279 (PMC3517415; doi:10.1371/journal.pone.0051279)
Supplement: Table S2 — Expression data of the 1491 genes with total physical counts larger than 16. (XLS) [file pone.0051279.s002.xls]

## Sheet: Assemble
	2CELL	MORU	TROC	19VEL	58VEL	74VEL	144PL	INTE	Total	Average length (bp)
Raw reads	58372	36903	45222	32919	24096	16866	73070	79543	366991	300.1
Clean reads	43641	35889	43991	32115	23631	16292	71602	75278	342439	296.1
Non-redundant reads	38923	33423	41160	30296	22441	14853	67916	58026	307038
Singletons	2804	2891	4521	2207	2022	910	6737	3055	25147	286.6
Contigs	N/A*								9567	510.3
Scaffolds	N/A*								701	884.8
Unigenes	N/A*								35415	358.9

## Sheet: Main
SeqID	2CELL	MORU	TROC	19VEL	58VEL	74VEL	144PL	Total count	Stars by σ-rules	Stars by Q-test	Total stars	E-value	MatchID	Description	Species
JU063545	31419	54169	28084	36423	42372	18321	10716	7244	7.82313	0	7.82313	1.09201e-17	O78682	Cytochrome c oxidase subunit 2	Carassius auratus
JU064608	31985	41541	20012	33932	31001	15297	9744	6070	7.16008	0	7.16008	3.62589e-37	Q34941	Cytochrome c oxidase subunit 1	Lumbricus terrestris
JU064611	18189	23606	12925	18847	19384	12252	4122	3497	5.45494	0	5.45494	9.26719e-19	Q34943	Cytochrome c oxidase subunit 3	Lumbricus terrestris
JU071714	25	11249	17055	26769	19161	24101	11676	3471	5.11361	0	5.11361
JU064609	2569	25461	10738	24260	17690	9492	6375	3099	4.99693	0	4.99693	1.1503e-11	Q34941	Cytochrome c oxidase subunit 1	Lumbricus terrestris
JU071754	9634	22020	13313	23369	16933	5385	3960	3096	5.04824	0	5.04824	5.1628e-12	P42678	Protein translation factor SUI1 homolog.	Anopheles gambiae
JU063890	2826	7988	33411	12873	3798	10889	8444	2963	4.62708	2	6.62708	1.32826e-07	P33248	Thymosin beta-12.	Lateolabrax japonicus
JU063381	8940	16575	10325	14754	14928	8146	8142	2783	4.88459	1	5.88459	1.99909e-17	ABK21482	unknown [Picea sitchensis].	Picea sitchensis
JU063200	0	299	291	231	133	1346	39563	2739	2.40402	3	5.40402	6.95527e-09	AAX11341	developmentally-regulated vdg3 [Haliotis asinina].	Haliotis asinina
JU063900	33707	9753	6632	11420	8778	2962	1354	2590	4.27362	3	7.27362	6.99513e-33	P34875	Cytochrome b	Sphyrna tiburo
JU071628	20656	11578	6243	11453	9224	4375	1855	2193	4.15574	0	4.15574	1.22243e-29	Q34946	ATP synthase subunit a	Lumbricus terrestris
JU071629	8549	12736	9133	11361	13861	5870	4461	2180	4.32838	0	4.32838	4.18342e-14	Q34947	NADH-ubiquinone oxidoreductase chain 5	Lumbricus terrestris
JU071577	29956	8586	5369	7624	6773	4308	574	2160	3.84736	3	6.84736	5.57898e-06	O47478	NADH-ubiquinone oxidoreductase chain 6	Loligo bleekeri
JU064489	25	4906	7483	7690	6283	21273	10306	1863	3.66887	1	4.66887	1.1147e-06	P53486	Actin, cytoplasmic 3	Takifugu rubripes
JU065621	0	9305	10471	10958	11318	15820	1825	1687	3.53638	0	3.53638	4.47744e-11	Q91575	Tubulin beta chain	Xenopus laevis
JU062677	1952	4667	2453	3894	6728	4443	14341	1642	3.3479	2	5.3479	1.65266e-87	ABY87349	profilin [Haliotis diversicolor].	Haliotis diversicolor
JU064614	12100	6941	5102	6931	5971	3366	3136	1520	3.54135	2	5.54135	4.85159e-26	Q37546	NADH-ubiquinone oxidoreductase chain 1	Lumbricus terrestris
JU071627	10841	7958	3450	5677	3654	1817	1590	1219	3.09025	0	3.09025	1.55425e-08	Q34048	NADH-ubiquinone oxidoreductase chain 4	Lumbricus terrestris
JU070508	0	4039	8503	10826	11140	5385	721	1192	2.86405	0	2.86405
JU062954	4932	8586	4251	4225	9892	3298	1384	1147	3.10482	0	3.10482	1.34372e-07	Q9U639	Heat shock 70 kDa protein cognate 4	Manduca sexta
JU071733	2106	5505	6486	7096	4990	3904	1987	1053	2.98001	0	2.98001	7.57851e-27	C7G0B5	PIF	Pinctada fucata
JU065894	16309	3848	2388	1701	2490	1660	382	1020	2.54175	3	5.54175	1.88366e-09	Q9EPH8	Polyadenylate-binding protein 1	Rattus norvegicus
JU063675	256	2154	5296	4984	3787	8280	5227	1014	2.78041	0	2.78041	6.59543e-23	P10984	Actin-2	Caenorhabditis elegans
JU062878	539	1675	9754	1056	2138	5049	5006	973	2.56381	1	3.56381	1.80145e-12	AAL31950	CDH1-D, partial [Gallus gallus].	Gallus gallus
JU063815	13102	4906	1725	2871	2138	202	58	887	2.27869	2	4.27869	1.37569e-158	P24861	G2/mitotic-specific cyclin-A.	Patella vulgata
JU062744	6140	5295	3717	3960	3163	740	1604	880	2.65251	0	2.65251	1.46217e-17	P62324	Protein BTG1	Homo sapiens
JU071651	1361	3769	3231	3531	4277	4241	4270	868	2.6838	2	4.6838	2.47302e-14	P19039	Elongation factor 1-alpha	Apis mellifera
JU071642	1464	4876	4737	6172	6862	4914	500	863	2.66929	1	3.66929	4.65591e-97	Q6QLW4	Cytochrome c.	Pectinaria gouldii
JU063248	0	1406	1141	957	1648	25043	4240	820	2.19416	3	5.19416	5.61298e-06	ABY87370	unknown protein 7 [Haliotis diversicolor].	Haliotis diversicolor
JU063064	0	1017	17808	66	178	202	279	795	1.51465	3	4.51465
JU071586	3596	5206	3231	5677	3966	2423	603	785	2.55384	0	2.55384	8.1371e-18	P08991	Histone H2A.V	Strongylocentrotus purpuratus
JU071718	0	2513	680	1584	2495	15484	4976	784	2.22922	2	4.22922
JU071604	4703	2359	3252	3980	2200	3441	2368	778	2.56489	0	2.56489	5.98506e-45	P54370	Ornithine decarboxylase antizyme 1	Rattus norvegicus
JU062711	0	179	121	66	0	875	10984	772	1.32208	3	4.32208
JU063868	0	2393	3547	4489	2718	5251	3754	756	2.33212	0	2.33212	2.88798e-10	P30163	Actin-2	Onchocerca volvulus
JU071571	0	2603	1214	825	1737	20667	3342	735	2.15111	3	5.15111	1.75743e-12	ABY87373	predicted protein 1 [Haliotis diversicolor].	Haliotis diversicolor
JU062707	873	5355	3765	5677	5080	1211	839	729	2.40158	1	3.40158	4.00385e-57	P07746	High mobility group-T protein	Oncorhynchus mykiss
JU064610	7553	3889	2308	1947	2673	1952	412	695	2.29996	1	3.29996	3.37681e-11	Q34941	Cytochrome c oxidase subunit 1	Lumbricus terrestris
JU070507	0	1017	534	594	1336	4847	6979	650	1.80349	0	1.80349
JU065561	205	59	14771	66	89	538	250	647	1.3814	3	4.3814	2.03008e-148	XP_003541206	PREDICTED: uncharacterized protein LOC100788489 [Glycine max].	Glycine max
JU068166	3417	2872	3012	5083	3342	1413	530	639	2.28995	0	2.28995
JU068929	0	2543	5320	8615	1158	807	368	628	1.91917	0	1.91917
JU066089	0	149	0	99	267	538	8819	621	1.2043	3	4.2043	5.82668e-16	Q9UM22	Mammalian ependymin-related protein 1	Homo sapiens
JU071614	1670	2483	3887	3531	1737	2760	1604	604	2.25908	0	2.25908	1.80691e-12	P84245	Histone H3.3.	Rattus norvegicus
JU062725	6294	3829	2040	2871	1381	67	14	577	1.89377	0	1.89377	5.6341e-117	P24862	G2/mitotic-specific cyclin-B.	Patella vulgata
JU071663	9120	2513	971	1683	802	0	412	576	1.82167	3	4.82167	6.66144e-15	Q9R226	KH domain-containing, RNA-binding, signal transduction-associated protein 3	Mus musculus
JU063676	51	1735	2332	2310	2495	6126	2665	554	2.05967	2	4.05967	3.92243e-07	P10987	Actin-5C	Drosophila melanogaster
JU062742	1387	2812	2478	3498	2718	1817	1604	553	2.17448	0	2.17448	4.62428e-113	P62258	14-3-3 protein epsilon	Homo sapiens
JU063249	0	1316	656	693	1916	8819	3946	534	1.81377	1	2.81377	2.61795e-44	ABY87374	unknown protein 8, partial [Haliotis diversicolor].	Haliotis diversicolor
scaffold118	1926	4099	1967	3399	2718	1683	589	522	2.09459	0	2.09459	1.38847e-09	P20483	M-phase inducer phosphatase	Drosophila melanogaster
JU071669	0	598	218	330	490	5520	5698	519	1.52425	3	4.52425	1.60928e-13	Q9Z339	Glutathione S-transferase omega-1	Rattus norvegicus
JU062819	0	418	72	297	802	6597	5374	507	1.49003	3	4.49003	3.22341e-14	Q7DFU6	Putative uncharacterized protein yghX.	Escherichia coli K-12
JU062709	0	209	97	132	623	403	6728	492	1.22193	3	4.22193	3.40609e-27	P10079	Fibropellin-1	Strongylocentrotus purpuratus
JU063888	770	1795	2113	3597	1515	2490	1987	492	2.01869	0	2.01869	5.98518e-24	ABW04628	metallothionein [Haliotis diversicolor supertexta].	Haliotis diversicolor
JU071568	282	2453	4567	5050	1292	1817	0	490	1.75121	0	1.75121
JU066903	0	149	24	99	89	336	6846	481	1.07792	3	4.07792
JU062704	2081	2722	1725	3597	2317	942	544	455	1.94433	0	1.94433	4.94327e-55	P03895	NADH-ubiquinone oxidoreductase chain 2	Drosophila yakuba
JU062793	1747	3141	2526	2937	2629	1077	206	455	1.91241	0	1.91241	2.67235e-49	Q5ZI72	Heterogeneous nuclear ribonucleoprotein D-like	Gallus gallus
JU063378	719	1136	6924	363	445	740	986	450	1.65423	3	4.65423	1.01175e-31	EGF97978	hypothetical protein PTSG_12390 [Salpingoeca sp. ATCC 50818].	Salpingoeca sp.
JU062872	9120	867	510	726	401	134	147	448	1.46699	3	4.46699	4.76106e-18	Q9Y2J2	Band 4.1-like protein 3	Homo sapiens
JU071596	179	1406	1676	2541	2183	1548	2532	444	1.83904	1	2.83904	5.36819e-09	P40941	ADP,ATP carrier protein 2, mitochondrial	Arabidopsis thaliana
JU063621	0	2872	2089	2244	2629	6664	441	438	1.80091	2	3.80091	1.66534e-10	P05214	Tubulin alpha-3 chain	Mus musculus
JU063624	0	2064	2891	1749	3208	3904	927	434	1.80476	0	1.80476	5.2704e-17	P06603	Tubulin alpha-1 chain.	Drosophila melanogaster
JU062908	0	2004	2842	4390	1069	2894	721	433	1.74968	0	1.74968
JU063088	0	89	10422	0	0	0	0	432	0.801597	3	3.8016	0	AEW42986	putative procollagen type VI alpha 4 [Haliotis diversicolor].	Haliotis diversicolor
JU062685	0	89	0	66	0	67	6257	431	0.884349	3	3.88435	1.11728e-06	EFN55802	hypothetical protein CHLNCDRAFT_145288 [Chlorella variabilis].	Chlorella variabilis
JU065255	873	2393	2332	2640	2183	1211	971	423	1.88872	1	2.88872	1.62309e-13	Q78P75	Dynein light chain 2, cytoplasmic	Rattus norvegicus
JU071702	873	2303	1360	2145	2272	2087	1546	419	1.89668	0	1.89668
JU063942	0	2752	2769	2409	2762	4779	88	418	1.69863	0	1.69863	6.06765e-39	P41383	Tubulin alpha-2/alpha-4 chain.	Patella vulgata
JU063625	488	2094	2672	2244	3074	3231	441	414	1.86326	2	3.86326	2.19545e-10	P06603	Tubulin alpha-1 chain.	Drosophila melanogaster
JU066557	0	389	437	759	2584	6059	3092	412	1.57993	0	1.57993
contig7500	5600	1765	1093	1221	1648	202	132	408	1.64471	3	4.64471
scaffold1	77	359	8406	33	44	202	515	401	1.19449	3	4.19449	1.23243e-13	AY145418	vNordotis discus 28S ribosomal RNA gene	Haliotis discus
JU064935	2620	2244	1433	1914	1871	1009	559	389	1.80623	0	1.80623	1.90031e-06	Q5WR10	Spliceosome RNA helicase DDX39B	Canis lupus
JU062747	205	1795	1725	1353	3119	3029	1354	387	1.7882	0	1.7882	2.48961e-09	P68371	Tubulin beta-4B chain	Homo sapiens
JU071391	0	1256	243	363	1381	8011	2488	382	1.51558	3	4.51558
JU062817	9377	119	48	99	0	0	0	374	0.86612	3	3.86612	7.57189e-24	Q725M6	Chaperone protein DnaJ.	Desulfovibrio vulgaris str. Hildenborough
JU065710	3519	1555	1579	1485	1381	1077	294	366	1.70451	2	3.70451	3.3871e-11	Q969G3	SWI/SNF-related matrix-associated actin-dependent regulator of chromatin subfamily E member 1	Homo sapiens
JU063947	1309	1654	1438	1853	1494	2195	1123	364	1.78544	0	1.78544	7.06331e-09	P41824	Y-box factor homolog	Aplysia californica
JU065678	616	897	1093	726	1203	740	2797	349	1.57399	3	4.57399	3.35125e-45	Q94514	Cytochrome c oxidase subunit 5A, mitochondrial	Drosophila melanogaster
scaffold594	0	329	24	99	757	1144	4387	347	1.12704	3	4.12704	3.58788e-13	Q9NJH0	Elongation factor 1-gamma	Drosophila melanogaster
JU071623	822	1226	1822	1815	891	4847	721	344	1.71763	3	4.71763	6.25152e-11	Q1HR24	40S ribosomal protein S14.	Aedes aegypti
JU064123	1310	748	2259	2376	1336	875	854	342	1.67746	1	2.67746	1.14244e-19	P62145	Calmodulin	Aplysia californica
JU064057	0	1077	1214	1650	668	3366	2061	341	1.53279	0	1.53279	1.10322e-37	P53471	Actin-2.	Schistosoma mansoni
JU069787	0	1107	3182	3630	1069	2221	0	335	1.3807	0	1.3807
JU062796	0	89	48	33	311	202	4682	334	0.941325	3	3.94132	4.20013e-19	Q60648	Ganglioside GM2 activator	Mus musculus
JU067035	0	89	0	0	89	0	4623	319	0.745236	3	3.74524
JU063036	0	2722	1384	825	2673	1346	971	319	1.5154	0	1.5154
JU066757	0	0	0	0	0	67	4549	310	0.663505	3	3.6635
JU062832	1438	1047	1482	1353	1782	1211	824	307	1.63082	0	1.63082	2.38102e-25	Q8N6R1	Stress-associated endoplasmic reticulum protein 2	Homo sapiens
JU063011	0	478	534	990	713	9492	1192	306	1.39433	3	4.39433
JU063615	102	688	340	1089	267	1009	3077	304	1.32362	2	3.32362	2.35374e-22	P04646	60S ribosomal protein L35a.	Rattus norvegicus
JU071283	0	957	2575	4258	356	673	250	302	1.33657	0	1.33657
JU063589	25	568	1797	1617	935	3702	1207	301	1.50056	1	2.50056	1.61257e-13	P00544	Tyrosine-protein kinase transforming protein Fgr.	Gammaretrovirus Feline sarcoma virus (STRAIN GARDNER-RASHEED)
JU062670	0	1795	2259	1848	1871	2288	235	301	1.47088	3	4.47088	1.57523e-37	A6H782	Tektin-3.	Bos taurus
JU062764	4290	1107	947	627	1114	0	176	299	1.35976	3	4.35976	5.65e-14	Q13362	Serine/threonine-protein phosphatase 2A 56 kDa regulatory subunit gamma isoform	Homo sapiens
JU062914	0	1226	2429	3300	579	605	515	298	1.39016	0	1.39016
JU062698	2337	2034	1117	1419	490	1144	309	297	1.54098	0	1.54098	2.20854e-15	O88569	Heterogeneous nuclear ribonucleoproteins A2/B1	Mus musculus
JU071674	0	1466	1627	2112	2406	3164	162	292	1.4538	0	1.4538	1.42389e-62	XP_002731202	PREDICTED: predicted protein-like isoform 2 [Saccoglossus kowalevskii].	Saccoglossus kowalevskii
scaffold101	179	1585	1409	1353	1515	605	1295	290	1.50557	0	1.50557	9.26955e-46	P08736	Elongation factor 1-alpha 1	Drosophila melanogaster
JU071626	616	2932	1652	1584	1381	740	88	286	1.47521	0	1.47521	1.97725e-10	Q2T9P4	UPF0602 protein C4orf47 homolog.	Bos taurus
JU071740	1130	2632	1482	1716	1114	538	58	282	1.45942	0	1.45942
JU071592	642	1256	461	1023	891	1413	1811	281	1.48402	0	1.48402	2.07985e-08	P29691	Elongation factor 2	Caenorhabditis elegans
JU062752	1258	2004	898	2343	1024	403	397	280	1.50482	0	1.50482	2.52464e-27	P83916	Chromobox protein homolog 1	Homo sapiens
JU071729	0	957	1554	2607	1292	3096	412	278	1.42871	0	1.42871
JU071647	0	179	0	0	0	67	3916	273	0.705667	3	3.70567	1.21302e-08	Q8TE57	A disintegrin and metalloproteinase with thrombospondin motifs 16	Homo sapiens
JU071630	0	209	48	0	356	0	3739	271	0.815203	3	3.8152	1.21566e-08	Q3KQ77	EF-hand calcium-binding domain-containing protein 1.	Xenopus laevis
JU062890	0	538	340	99	356	6664	1884	270	1.20743	3	4.20743	6.5211e-15	ZP_08495106	FG-GAP repeat protein [Microcoleus vaginatus FGP-2].	Microcoleus vaginatus FGP-2
JU066569	0	209	97	264	222	6732	2135	269	1.13399	3	4.13399
JU064174	25	987	826	1023	1737	403	1678	258	1.3398	0	1.3398	3.06286e-20	XP_002740373	PREDICTED: calmodulin-like [Saccoglossus kowalevskii].	Saccoglossus kowalevskii
JU062738	0	1406	1093	957	1426	3568	721	255	1.38878	2	3.38878	5.23886e-12	P51544	Arginine kinase	Haliotis madaka
JU062790	1027	1367	753	1056	3604	538	235	254	1.4333	2	3.4333	3.4652e-08	Q5SUF2	Luc7-like protein 3	Mus musculus
JU071575	3519	927	656	594	713	202	265	250	1.31021	3	4.31021
JU062789	1053	1645	1044	1518	1737	942	147	248	1.43956	0	1.43956	1.05342e-12	Q5RBU8	Heterogeneous nuclear ribonucleoproteins A2/B1	Pongo abelii
JU062705	0	897	1506	2178	1114	1548	618	248	1.34827	0	1.34827	1.01279e-07	P05945	Myosin catalytic light chain LC-1, mantle muscle.	Todarodes pacificus
JU063065	0	299	340	231	490	3500	2179	242	1.15153	0	1.15153
JU063719	2312	1047	1117	1551	802	269	0	240	1.26013	0	1.26013	6.01008e-08	P15308	Protein B4	Xenopus laevis
JU071687	0	867	48	165	267	3029	2193	236	1.0857	0	1.0857
JU063899	745	1974	898	2277	713	336	191	235	1.34786	1	2.34786	1.17899e-56	P34850	NADH-ubiquinone oxidoreductase chain 3	Anopheles gambiae
JU062710	436	179	583	1155	623	336	1958	234	1.24636	0	1.24636	3.39152e-79	P10818	Cytochrome c oxidase subunit 6A1, mitochondrial	Rattus norvegicus
JU065613	128	269	898	1584	668	2019	1281	231	1.31875	0	1.31875	4.59442e-21	Q90YT1	60S ribosomal protein L37.	Ictalurus punctatus
JU071662	0	1615	534	495	2851	2288	603	230	1.29092	0	1.29092	1.75781e-12	Q9NWM8	Peptidyl-prolyl cis-trans isomerase FKBP14	Homo sapiens
JU071610	205	867	1117	330	1158	538	1487	228	1.29055	0	1.29055	6.47407e-23	P63081	V-type proton ATPase 16 kDa proteolipid subunit	Rattus norvegicus
JU068504	4675	598	72	495	222	67	0	226	0.957282	3	3.95728
JU062800	0	688	1141	330	2807	2019	765	225	1.2657	0	1.2657	6.22449e-10	Q641F3	Collagen alpha-1(XXI) chain	Xenopus laevis
JU062885	0	1077	1676	2079	1648	1211	0	223	1.16319	1	2.16319
JU062855	154	508	728	660	935	336	1796	221	1.22808	1	2.22808	1.88994e-06	Q9GZ71	Tropomyosin.	Haliotis diversicolor
JU063922	1079	389	898	1023	668	1279	927	220	1.35378	0	1.35378	7.54567e-11	P38117	Electron transfer flavoprotein subunit beta	Homo sapiens
contig2750	1849	1346	413	1353	1648	202	44	218	1.25954	1	2.25954	7.75678e-160	Q9B840	Cytochrome c oxidase subunit 1	Ostrinia nubilalis
JU071581	51	269	850	594	534	2356	1531	215	1.21968	0	1.21968	1.38768e-12	O61463	60S acidic ribosomal protein P2.	Cryptochiton stelleri
JU064216	1156	538	461	561	311	403	1472	212	1.23313	1	2.23313	1.70716e-15	P86229	Keratinocyte-associated protein 2	Canis lupus
JU063025	0	89	97	99	0	67	2900	208	0.732138	3	3.73214
JU063684	256	1136	1093	891	1604	1615	412	208	1.33647	0	1.33647	1.64836e-10	P11833	Tubulin beta chain	Paracentrotus lividus
JU071650	128	1226	971	1485	1336	875	471	206	1.30042	0	1.30042	1.5354e-51	Q8VEM8	Phosphate carrier protein, mitochondrial	Mus musculus
JU064491	282	1136	315	429	1782	605	1192	205	1.25058	0	1.25058	9.43868e-62	Q26481	60S ribosomal protein L5.	Styela clava
JU064178	3519	478	413	363	267	0	250	204	1.06132	3	4.06132	2.30289e-12	P81004	Voltage-dependent anion-selective channel protein 2	Xenopus laevis
JU065909	822	1645	1457	594	1247	67	117	202	1.22076	0	1.22076	1.75757e-07	Q9G6J1	Cytochrome c oxidase subunit 1	Octopus vulgaris
JU062879	2903	807	485	627	311	269	162	201	1.16499	3	4.16499	8.84791e-59	XP_002154876	PREDICTED: hypothetical protein [Hydra magnipapillata].	Hydra magnipapillata
JU064492	154	957	1166	1320	713	1009	633	200	1.2782	0	1.2782	4.10272e-09	Q26486	46 kDa FK506-binding nuclear protein	Spodoptera frugiperda
JU064374	1181	1226	874	1419	802	0	235	200	1.21376	0	1.21376	3.21956e-14	Q11118	Protein wos2	Schizosaccharomyces pombe 972h-
JU062693	51	867	1093	1419	1737	1077	338	197	1.2538	0	1.2538	5.54385e-06	O43390	Heterogeneous nuclear ribonucleoprotein R	Homo sapiens
JU065612	411	568	583	429	757	1750	1207	197	1.25504	0	1.25504	5.20684e-59	Q90YS3	40S ribosomal protein S2.	Ictalurus punctatus
JU063420	4085	239	48	429	490	0	29	195	0.899568	3	3.89957	3.94156e-20	O13024	Inner centromere protein A	Xenopus laevis
JU063017	0	1017	1093	1485	1381	2423	58	195	1.17196	0	1.17196
JU062903	0	179	24	0	0	269	2694	194	0.677757	3	3.67776	3.08509e-72	A4HXX6	Hypothetical repeat protein	Leishmania infantum JPCM5
JU071653	2723	299	558	297	534	336	427	194	1.15496	3	4.15496	5.47329e-09	Q95029	Cathepsin L	Drosophila melanogaster
JU066605	0	0	0	33	0	0	2827	193	0.53058	3	3.53058	3.07571e-162	Q8IMS9	LIM/homeobox protein Awh	Drosophila melanogaster
JU062775	0	1107	1554	1353	1292	1077	73	192	1.14667	2	3.14667	1.33598e-07	Q2QL79	Mediator of RNA polymerase II transcription subunit 24	Danio rerio
JU071632	0	777	1312	1155	1604	1077	338	190	1.18428	0	1.18428	1.42583e-09	Q5PPV2	Tektin-4.	Xenopus laevis
JU070941	0	1555	1190	1683	668	1481	14	190	1.10411	0	1.10411
JU071595	2004	807	704	891	579	202	176	189	1.19326	2	3.19326	4.92067e-10	P38159	RNA-binding motif protein, X chromosome	Homo sapiens
JU064606	154	628	947	1452	1203	740	589	188	1.241	0	1.241	2.70068e-61	Q32P85	UPF0197 transmembrane protein C11orf10 homolog.	Bos taurus
JU069424	2363	448	656	1485	178	134	44	188	1.08983	0	1.08983
JU071607	359	568	340	759	490	1615	1207	187	1.21104	0	1.21104	1.82975e-32	P60901	Proteasome subunit alpha type-6	Rattus norvegicus
JU062827	0	927	1797	1782	623	471	58	184	1.06808	0	1.06808	5.21348e-36	XP_002613439	hypothetical protein BRAFLDRAFT_84575 [Branchiostoma floridae].	Branchiostoma floridae
scaffold508	0	29	4178	0	89	134	103	184	0.699595	3	3.69959	8.86451e-110	XP_003429480	PREDICTED: prolow-density lipoprotein receptor-related protein 1-like, partial [Ornithorhynchus anatinus].	Ornithorhynchus anatinus
JU063449	0	628	145	495	757	4645	824	184	1.10063	3	4.10063	1.04119e-61	O18783	Plasminogen	Macropus eugenii
JU063686	0	1107	1360	726	1381	1750	162	183	1.15143	0	1.15143	1.42101e-17	P11833	Tubulin beta chain	Paracentrotus lividus
JU065967	2055	538	583	759	401	740	206	179	1.17642	3	4.17642	9.727e-27	Q9N1Q0	Small nuclear ribonucleoprotein-associated protein B'	Macropus eugenii
JU069805	4521	29	24	33	0	0	0	179	0.580931	3	3.58093
JU063276	0	0	24	0	0	202	2547	177	0.567331	3	3.56733	0	ACZ15980	anoxia-induced grl-like protein [Haliotis discus discus].	Haliotis discus
JU062911	488	1675	728	1122	490	1009	132	174	1.19071	0	1.19071
JU071634	128	598	413	792	490	807	1251	174	1.13324	0	1.13324	1.18522e-07	Q5RFH0	ATP synthase subunit g, mitochondrial	Pongo abelii
contig6337	102	1017	971	957	891	1144	368	169	1.18343	0	1.18343
JU062905	0	29	0	0	0	67	2444	168	0.531557	3	3.53156
JU071751	0	807	194	66	2361	1009	927	168	1.01889	2	3.01889
JU069013	0	628	656	2013	891	807	368	166	1.09019	1	2.09019
JU064245	0	0	48	0	89	0	2370	165	0.554179	3	3.55418	1.06596e-17	P98072	Enteropeptidase	Bos taurus
JU063792	179	658	1141	825	222	202	824	165	1.09438	0	1.09438	9.20774e-172	P24495	Proteasome subunit alpha type-2	Xenopus laevis
JU062866	1952	418	413	561	623	269	323	164	1.11206	3	4.11206	6.57017e-07	Q9UJG1	Motile sperm domain-containing protein 1.	Homo sapiens
JU063623	0	718	631	528	1158	1077	824	164	1.09215	0	1.09215	1.4268e-17	P06144	Late histone H1.	Lytechinus pictus
contig3751	3751	89	170	132	0	0	0	160	0.659331	3	3.65933
JU062751	2671	179	72	132	222	0	559	160	0.884989	3	3.88499	2.26504e-07	P82198	Transforming growth factor-beta-induced protein ig-h3	Mus musculus
JU063191	0	329	121	99	668	269	1766	158	0.861145	2	2.86115	5.16726e-41	AAS86719	unknown, partial [Lymnaea stagnalis].	Lymnaea stagnalis
JU064781	0	239	72	0	356	0	2046	158	0.684966	3	3.68497	8.60713e-07	Q56K04	Cysteine-rich protein 1	Bos taurus
JU062942	0	987	1457	1221	802	538	29	158	1.00204	0	1.00204
JU062895	0	1136	243	99	2673	2087	206	156	1.00406	0	1.00406
JU066073	0	777	801	957	1247	1009	368	156	1.08545	0	1.08545	3.90284e-23	Q9UIF3	Tektin-2	Homo sapiens
JU062935	616	1675	680	891	267	202	162	155	1.0846	1	2.0846
JU065332	179	389	340	363	713	1144	1133	155	1.07884	0	1.07884	3.48804e-22	Q7ZYS1	60S ribosomal protein L19.	Xenopus laevis
JU063743	2158	538	437	462	445	134	117	154	1.02846	3	4.02846	1.48222e-14	P18932	NADH-ubiquinone oxidoreductase chain 5	Drosophila melanogaster
JU071684	0	807	1093	1023	1069	1211	132	154	1.05762	1	2.05762
JU064147	565	568	1069	396	445	673	530	153	1.12397	2	3.12397	4.96495e-19	P63245	Guanine nucleotide-binding protein subunit beta-2-like 1	Rattus norvegicus
JU071736	2492	748	218	594	133	0	0	152	0.850851	3	3.85085
JU064249	0	538	315	561	713	740	1133	152	1.00224	0	1.00224	1.94698e-11	P98155	Very low-density lipoprotein receptor	Homo sapiens
JU062748	25	448	413	396	623	1750	986	152	1.05308	0	1.05308	4.41735e-19	P70663	SPARC-like protein 1	Mus musculus
JU066045	1156	389	340	231	490	269	809	149	1.05122	0	1.05122	3.9175e-15	Q9R1T3	Cathepsin Z	Rattus norvegicus
JU071576	513	488	663	425	872	652	602	147	1.11616	0	1.11616	2.55007e-06	O16797	60S ribosomal protein L3.	Drosophila melanogaster
JU068226	0	149	72	66	178	134	1899	145	0.71978	3	3.71978
JU064068	0	119	291	132	267	538	1619	144	0.829634	2	2.82963	4.52218e-08	P54864	Transcription factor AP-1	Serinus canaria
JU062754	154	478	1093	1518	534	403	162	142	1.04181	0	1.04181	3.47705e-16	P90789	NADH dehydrogenase [ubiquinone] 1 beta subcomplex subunit 7.	Caenorhabditis elegans
JU064102	462	628	704	528	1559	942	132	142	1.10243	0	1.10243	8.44408e-10	P60467	Protein transport protein Sec61 subunit beta.	Canis lupus
JU063746	25	149	315	561	178	67	1487	142	0.857639	2	2.85764	3.46183e-16	P19483	ATP synthase subunit alpha, mitochondrial	Bos taurus
JU062956	0	0	145	66	0	67	1943	141	0.584027	3	3.58403
JU063184	0	0	0	0	0	0	2076	141	0.424084	3	3.42408	0	AAM20842	SARP-19 precursor [Littorina littorea].	Littorina littorea
JU063689	308	418	267	396	802	942	883	141	1.06129	2	3.06129	2.80493e-18	P12001	60S ribosomal protein L18.	Rattus norvegicus
JU065431	25	508	607	1287	1292	1211	162	140	1.04689	0	1.04689	4.45056e-11	Q8I7D9	Protein transport protein Sec61 subunit gamma.	Ciona intestinalis
JU062842	1387	718	364	594	668	403	103	139	1.04755	1	2.04755	4.464e-11	Q92804	TATA-binding protein-associated factor 2N	Homo sapiens
JU071580	231	598	413	561	713	1481	559	139	1.09188	2	3.09188	2.0682e-45	O61231	60S ribosomal protein L10	Drosophila melanogaster
JU062851	308	568	243	132	490	673	1045	137	0.996086	0	0.996086	5.96136e-16	Q9D3D9	ATP synthase subunit delta, mitochondrial	Mus musculus
JU063277	0	0	0	0	0	202	1973	137	0.475282	3	3.47528	1.23093e-13	ACZ15982	defensin [Haliotis discus discus].	Haliotis discus
JU071608	128	718	485	792	846	403	559	136	1.05283	0	1.05283	2.27736e-07	P62277	40S ribosomal protein S13.	Homo sapiens
JU063973	0	329	170	99	267	1211	1339	136	0.854499	2	2.8545	5.91059e-16	P46436	Glutathione S-transferase 1	Ascaris suum
JU066094	1875	628	218	363	534	134	103	135	0.963129	3	3.96313	5.62403e-14	Q9UPM9	B9 domain-containing protein 1	Homo sapiens
JU065228	770	867	850	759	445	269	44	134	1.01676	0	1.01676	8.97597e-12	Q6WV66	Histone H2A.	Mytilus californianus
JU065937	0	149	97	66	891	4106	618	134	0.871894	3	3.87189	9.25197e-09	Q9I926	Fucolectin-6	Anguilla japonica
JU071601	462	508	340	264	579	336	824	131	1.00931	0	1.00931	1.44448e-06	P46778	60S ribosomal protein L21.	Homo sapiens
JU071666	0	119	170	198	445	740	1354	130	0.827345	0	0.827345	5.21227e-12	Q9WVA4	Transgelin-2	Mus musculus
JU065605	2620	299	145	165	267	0	0	129	0.728466	3	3.72847	3.91065e-07	Q8WY41	Nanos homolog 1	Homo sapiens
JU064591	102	508	753	1056	757	875	220	129	1.03392	0	1.03392	3.76645e-32	Q2VIU1	E3 ubiquitin-protein ligase UBR4	Rattus norvegicus
JU071700	0	0	0	0	0	0	1899	129	0.405636	3	3.40564
JU062837	411	1675	558	528	356	269	73	128	0.976552	3	3.97655	4.72631e-13	Q8WXF0	Serine/arginine-rich splicing factor 12	Homo sapiens
JU065045	1541	478	72	66	311	1077	338	127	0.940497	0	0.940497	7.98839e-13	Q66JF3	MAP kinase-interacting serine/threonine-protein kinase 1	Xenopus (Silurana) tropicalis
JU062893	616	628	558	693	401	202	382	127	1.02469	0	1.02469
JU062950	0	688	583	1320	1069	471	132	127	0.94871	0	0.94871
JU071668	256	718	534	396	623	269	589	126	1.01008	0	1.01008	7.33399e-14	Q9Z336	Dynein light chain Tctex-type 1	Rattus norvegicus
JU071561	2569	359	72	132	178	67	29	126	0.771735	3	3.77173
JU071679	0	1017	947	1122	401	538	14	125	0.883386	0	0.883386
JU063871	77	628	485	858	1024	1346	176	125	1.02207	0	1.02207	7.88494e-38	P30883	Tubulin beta-4 chain.	Xenopus laevis
JU066135	205	329	388	957	311	471	692	125	0.988451	0	0.988451	3.19828e-09	Q9W141	Putative ATP synthase subunit f, mitochondrial.	Drosophila melanogaster
JU062828	25	897	510	759	490	673	412	124	0.986657	0	0.986657	8.52516e-47	Q8N2E2	von Willebrand factor D and EGF domain-containing protein	Homo sapiens
JU064739	51	389	680	990	802	1009	265	124	1.00524	0	1.00524	2.29161e-51	Q4V7B5	Coiled-coil domain-containing protein 105.	Rattus norvegicus
JU067895	513	209	485	726	401	538	559	124	1.00975	0	1.00975
JU071584	0	299	267	0	623	2625	721	123	0.838048	3	3.83805
JU069247	2004	209	243	825	89	0	0	122	0.751929	2	2.75193
JU063858	565	568	558	528	534	67	427	122	0.989074	3	3.98907	2.29954e-07	P29310	14-3-3 protein zeta	Drosophila melanogaster
JU062907	0	389	923	1749	401	471	14	121	0.846262	0	0.846262
JU064001	334	149	461	264	846	1817	441	121	1.00219	2	3.00219	5.57638e-74	P49165	60S ribosomal protein L4	Urechis caupo
JU062857	1464	269	413	264	623	134	191	120	0.937953	2	2.93795	1.24955e-63	Q9JII5	DAZ-associated protein 1	Mus musculus
JU064488	411	239	267	561	490	269	765	119	0.957006	0	0.957006	5.51539e-109	Q25532	V-type proton ATPase subunit G	Manduca sexta
JU063831	359	807	364	396	534	202	530	119	0.98111	0	0.98111	7.26749e-22	P26794	Serine/threonine-protein kinase pim-1.	Rattus norvegicus
JU071646	0	867	801	462	891	202	294	119	0.91242	0	0.91242	7.03159e-09	P62184	Calmodulin	Renilla reniformis
JU071659	256	748	680	132	579	673	412	118	0.982605	0	0.982605	2.62297e-08	Q9ESU6	Bromodomain-containing protein 4	Mus musculus
JU064307	1490	688	340	297	579	0	14	118	0.848491	1	1.84849	1.40682e-17	Q06A98	Serine/arginine-rich splicing factor 2	Sus scrofa
contig5709	2106	209	170	396	178	269	14	117	0.814639	3	3.81464
JU064909	411	269	315	330	311	605	765	116	0.950888	0	0.950888	2.46713e-22	Q5RFL2	ATP synthase lipid-binding protein, mitochondrial	Pongo abelii
JU064116	308	299	461	231	222	336	839	115	0.916186	2	2.91619	6.20224e-20	P61603	10 kDa heat shock protein, mitochondrial	Bos taurus
JU069916	0	29	24	0	0	0	1663	115	0.451066	3	3.45107
JU062941	0	389	218	330	1114	1615	485	114	0.907562	0	0.907562
JU062865	822	239	388	429	178	403	515	114	0.944847	0	0.944847	9.3981e-30	Q9UDW1	Cytochrome b-c1 complex subunit 9	Homo sapiens
JU070099	0	89	607	1386	133	740	427	113	0.844534	0	0.844534
JU064684	539	688	680	561	713	67	103	113	0.944241	2	2.94424	5.58428e-43	Q3ZBW4	Proliferating cell nuclear antigen	Bos taurus
JU064207	51	688	413	726	668	336	427	113	0.94706	0	0.94706	1.0265e-23	P84082	ADP-ribosylation factor 2.	Rattus norvegicus
JU064349	0	418	753	858	534	673	279	112	0.906931	0	0.906931	5.72487e-11	Q0Q028	Putative defense protein 3	Antheraea mylitta
JU062861	0	59	24	363	0	0	1443	112	0.558221	3	3.55822	8.92676e-84	Q9N0C7	Mammalian ependymin-related protein 1	Macaca fascicularis
JU062830	0	29	0	0	0	0	1634	112	0.411979	3	3.41198	1.25197e-18	Q8N2E2	von Willebrand factor D and EGF domain-containing protein	Homo sapiens
scaffold505	513	1615	364	297	222	202	88	112	0.896806	3	3.89681	2.39049e-09	Q91VX2	Ubiquitin-associated protein 2	Mus musculus
JU064429	25	269	315	495	668	1077	633	112	0.92531	0	0.92531	6.56455e-47	Q16943	Vesicle-associated membrane protein/synaptobrevin-binding protein	Aplysia californica
JU065538	25	0	48	66	0	807	1384	111	0.606718	1	1.60672	2.52064e-43	Q8SPI1	Cytochrome c oxidase subunit 7C, mitochondrial	Macaca fascicularis
JU062708	0	568	558	627	980	875	220	111	0.917239	0	0.917239	1.32546e-32	P08051	Myosin regulatory light chain, smooth muscle.	Pseudocardium sachalinensis
JU062699	334	1226	315	462	668	269	162	111	0.948055	1	1.94806	2.36992e-12	Q60446	Heat shock protein 105 kDa	Cricetulus griseus
JU071605	796	299	437	165	267	403	515	111	0.929395	0	0.929395	5.33559e-13	P58340	Myeloid leukemia factor 1	Homo sapiens
JU062852	102	807	558	792	267	269	323	110	0.929682	0	0.929682	3.33658e-11	Q9D8W5	26S proteasome non-ATPase regulatory subunit 12	Mus musculus
contig1565	128	748	461	924	534	740	132	109	0.952392	0	0.952392
JU063405	51	299	194	429	311	336	927	108	0.851063	2	2.85106	9.05479e-17	O01802	60S ribosomal protein L7.	Caenorhabditis elegans
JU062805	847	299	194	1023	267	202	250	108	0.914569	2	2.91457	8.79577e-12	Q6GLC5	Transmembrane protein 93.	Xenopus (Silurana) tropicalis
JU064716	25	538	340	429	534	875	530	107	0.916416	0	0.916416	5.28264e-09	Q4PMB3	40S ribosomal protein S4.	Ixodes scapularis
JU063571	719	239	315	1089	445	471	103	106	0.925875	0	0.925875	2.59248e-19	O96015	Dynein light chain 4, axonemal.	Homo sapiens
JU063828	1978	448	72	165	133	0	44	106	0.717173	3	3.71717	1.21155e-08	P26368	Splicing factor U2AF 65 kDa subunit	Homo sapiens
JU063050	0	1047	0	132	1114	471	515	106	0.767052	0	0.767052
JU063294	873	658	534	462	267	134	88	106	0.902346	0	0.902346	3.37801e-27	B1AXD8	Forkhead-associated domain-containing protein 1	Homo sapiens
JU062920	0	299	607	891	133	471	471	104	0.835481	0	0.835481
JU063643	154	119	340	990	267	807	471	104	0.901407	0	0.901407	2.86659e-18	P08570	60S acidic ribosomal protein P1	Drosophila melanogaster
JU064904	411	179	145	462	623	336	633	104	0.899138	0	0.899138	1.12403e-14	Q5REG2	Cytochrome c oxidase subunit 5B, mitochondrial	Pongo abelii
JU071562	0	389	680	1815	222	134	14	104	0.748667	2	2.74867
JU062681	0	418	194	66	133	1481	809	104	0.779395	0	0.779395	6.53358e-15	ACZ15981	leukocyte cell derived chemotaxin 1-like protein [Haliotis discus discus].	Haliotis discus
JU063956	25	418	340	264	668	471	647	103	0.873722	0	0.873722	1.47743e-21	P42577	Soma ferritin.	Lymnaea stagnalis
JU062840	179	329	534	165	490	807	515	103	0.913744	0	0.913744	1.44106e-30	Q90YU9	60S ribosomal protein L18a.	Ictalurus punctatus
JU064125	334	329	437	429	579	134	471	102	0.908814	0	0.908814	1.58941e-102	P62197	26S protease regulatory subunit 8	Sus scrofa
JU063251	1002	239	291	429	534	403	176	102	0.911452	1	1.91145	1.91277e-38	ABY87399	putative RNA-binding protein [Haliotis diversicolor].	Haliotis diversicolor
JU069831	0	538	291	66	980	1548	353	101	0.839493	0	0.839493
JU063908	693	568	388	231	935	471	44	100	0.898647	0	0.898647	5.13115e-36	P35558	Phosphoenolpyruvate carboxykinase, cytosolic [GTP]	Homo sapiens
JU064471	77	179	218	165	178	471	971	100	0.792408	1	1.79241	5.81261e-11	Q24251	ATP synthase subunit d, mitochondrial	Drosophila melanogaster
JU062750	924	269	388	264	668	403	147	100	0.904025	0	0.904025	4.92061e-27	P81021	Vigilin.	Gallus gallus
JU063829	179	418	97	99	267	269	898	99	0.799259	2	2.79926	1.97579e-35	P26641	Elongation factor 1-gamma	Homo sapiens
JU065263	25	448	267	495	356	403	633	99	0.85348	0	0.85348	4.39693e-11	Q7KF90	60S ribosomal protein L31.	Spodoptera frugiperda
JU064818	359	448	413	198	178	134	589	98	0.854478	0	0.854478	1.29835e-15	Q5EAE6	Death-associated protein 1	Bos taurus
JU068158	0	29	24	0	133	0	1369	98	0.477694	3	3.47769
JU063067	1181	508	364	462	222	58	0	98	0.774681	2	2.77468
JU065434	69	515	354	365	332	1127	411	98	0.894086	2	2.89409	2.15695e-08	Q8ISP0	40S ribosomal protein S18.	Branchiostoma belcheri
JU063711	0	418	510	264	891	336	427	97	0.830221	0	0.830221	5.10767e-07	P14211	Calreticulin	Mus musculus
JU062802	51	89	850	0	356	202	677	97	0.728776	0	0.728776	1.93765e-46	Q6CQE5	Protein TAR1.	Kluyveromyces lactis NRRL Y-1140
JU063986	154	389	364	231	846	403	456	97	0.891081	1	1.89108	8.50704e-23	P47826	60S acidic ribosomal protein P0	Gallus gallus
JU065483	2158	269	24	33	89	0	0	97	0.556403	3	3.5564	8.16533e-10	Q8MQJ9	Brain tumor protein.	Drosophila melanogaster
JU064807	256	748	437	561	445	202	191	96	0.893841	0	0.893841	4.46375e-16	Q5D018	RNA-binding protein 8A	Danio rerio
JU071755	770	478	267	561	490	134	132	96	0.880254	0	0.880254	6.57034e-07	P05455	Lupus La protein	Homo sapiens
JU062765	154	598	413	330	1203	202	176	95	0.878573	2	2.87857	4.03646e-12	Q14151	Scaffold attachment factor B2	Homo sapiens
JU071677	154	179	121	297	222	134	912	95	0.773561	3	3.77356
JU063243	0	299	194	33	44	1413	795	95	0.71151	0	0.71151	4.34266e-11	ABY87358	hypothetical protein 2, partial [Haliotis diversicolor].	Haliotis diversicolor
JU063835	154	359	243	627	222	1009	412	95	0.886987	0	0.886987	5.97879e-08	P27085	40S ribosomal protein S26.	Octopus vulgaris
JU071220	0	0	0	0	0	0	1384	94	0.346268	3	3.34627
JU064141	154	598	170	264	579	740	412	93	0.878941	0	0.878941	7.60026e-09	P62919	60S ribosomal protein L8.	Rattus norvegicus
JU062938	0	0	0	66	0	0	1339	93	0.391196	3	3.3912
JU071183	0	29	24	0	0	0	1339	93	0.412114	3	3.41211
JU065397	282	239	291	462	401	1750	191	93	0.894829	3	3.89483	4.62487e-08	Q8BN59	La-related protein 6	Mus musculus
JU067070	0	0	24	33	0	0	1325	92	0.410248	3	3.41025
JU071633	642	628	485	231	534	67	88	92	0.843334	0	0.843334	3.8778e-07	Q5R7R9	SNW domain-containing protein 1	Pongo abelii
JU062811	1490	329	291	165	178	134	0	92	0.715914	3	3.71591	3.34188e-11	Q6NX31	DNA replication licensing factor mcm7	Xenopus (Silurana) tropicalis
JU062745	128	239	243	462	490	673	485	91	0.864027	0	0.864027	1.72689e-07	P62850	40S ribosomal protein S24.	Rattus norvegicus
JU066238	0	389	753	1122	133	538	29	91	0.749227	0	0.749227	2.04296e-08	XP_001626794	predicted protein, partial [Nematostella vectensis].	Nematostella vectensis
JU071579	282	508	267	165	267	269	544	91	0.840147	2	2.84015	2.78765e-13	O48513	60S ribosomal protein L13	Chlamydomonas sp.
JU064176	385	299	170	297	178	202	618	90	0.817648	1	1.81765	1.37097e-12	P80912	Histidine triad nucleotide-binding protein 1	Oryctolagus cuniculus
JU063979	205	239	97	330	356	403	677	90	0.817126	0	0.817126	1.72368e-47	P46781	40S ribosomal protein S9.	Homo sapiens
JU071245	0	448	218	363	623	1009	382	90	0.817979	0	0.817979
JU064579	25	389	461	528	401	336	397	90	0.835594	2	2.83559	4.53065e-08	Q2T9V2	Nuclear autoantigenic sperm protein	Bos taurus
JU071631	1027	389	170	231	178	403	176	89	0.826275	3	3.82627	3.54541e-08	Q5M9G3	Caprin-1	Rattus norvegicus
JU071717	539	179	218	132	133	67	662	89	0.766862	1	1.76686
JU068813	436	359	461	1254	89	67	0	89	0.733012	2	2.73301
JU071567	0	59	0	0	0	0	1281	89	0.383613	3	3.38361	1.17478e-11	ABO26591	putative perlucin 2 [Haliotis discus discus].	Haliotis discus
JU071667	0	418	461	627	222	471	368	89	0.797899	0	0.797899	9.88412e-19	Q9Y5Z4	Heme-binding protein 2	Homo sapiens
JU062892	1104	209	364	396	267	202	44	89	0.801934	2	2.80193
JU064136	256	1077	121	66	267	269	382	89	0.798605	3	3.79861	6.64079e-52	P62752	60S ribosomal protein L23a.	Rattus norvegicus
JU066329	1284	209	267	231	311	202	44	88	0.77819	3	3.77819	1.70803e-15	XP_002572544	hypothetical protein [Schistosoma mansoni].	Schistosoma mansoni
JU062836	0	209	510	825	311	269	353	88	0.777602	0	0.777602	3.99084e-49	Q8UWA5	Carbonic anhydrase 2	Tribolodon hakonensis
JU064164	590	359	267	165	89	134	485	88	0.799443	0	0.799443	5.35179e-38	P78929	Cofilin	Schizosaccharomyces pombe 972h-
JU064782	51	658	121	264	311	471	530	87	0.802188	0	0.802188	4.46656e-08	Q56K10	40S ribosomal protein S15.	Bos taurus
JU064212	0	418	631	792	178	538	162	87	0.781608	0	0.781608	2.24988e-51	P84875	Carboxypeptidase inhibitor SmCI.	Sabellastarte magnifica
JU062999	0	29	0	0	0	0	1266	87	0.366907	3	3.36691
JU071710	0	29	0	0	0	0	1266	87	0.366907	3	3.36691
JU064041	334	628	461	297	713	67	117	87	0.834839	0	0.834839	5.55736e-06	P52301	GTP-binding nuclear protein Ran	Xenopus laevis
JU062770	25	329	607	165	891	403	279	87	0.815471	0	0.815471	5.56207e-14	Q26630	33 kDa inner dynein arm light chain, axonemal	Strongylocentrotus purpuratus
JU071625	359	538	364	363	445	134	250	87	0.852617	0	0.852617	6.39689e-18	Q28IJ3	Prostamide/prostaglandin F synthase	Xenopus (Silurana) tropicalis
JU064025	899	299	121	165	133	202	382	87	0.789771	2	2.78977	6.36916e-18	P51121	Glutamine synthetase	Xenopus laevis
JU066075	899	239	267	924	178	0	14	87	0.726837	3	3.72684	2.0038e-11	Q9UIW2	Plexin-A1	Homo sapiens
scaffold515	642	777	340	363	267	134	29	86	0.801207	0	0.801207	9.50638e-14	Q92541	RNA polymerase-associated protein RTF1 homolog.	Homo sapiens
JU062860	51	149	947	99	222	67	456	86	0.729665	1	1.72967	2.49088e-14	Q9LQU4	Protein PLANT CADMIUM RESISTANCE 2	Arabidopsis thaliana
JU063298	0	149	364	132	445	202	706	85	0.711838	0	0.711838	3.78539e-15	B3EX21	Nucleoside diphosphate kinase 6	Xenopus (Silurana) tropicalis
JU071691	1079	209	97	165	89	336	294	85	0.76731	3	3.76731
JU062675	0	0	0	0	44	0	1236	85	0.363054	3	3.36305	1.23259e-29	ABO26591	putative perlucin 2 [Haliotis discus discus].	Haliotis discus
JU064105	128	269	437	561	222	269	397	85	0.822641	0	0.822641	1.61461e-161	P60842	Eukaryotic initiation factor 4A-I	Homo sapiens
JU069689	205	418	291	495	668	875	117	85	0.864773	0	0.864773
JU062810	385	598	243	462	623	269	103	84	0.844193	0	0.844193	2.17712e-18	Q6NUH3	Nitric oxide synthase-interacting protein.	Xenopus laevis
JU063612	0	0	0	0	0	134	1207	84	0.373908	3	3.37391	3.6298e-13	AAM20843	SHG [Littorina littorea].	Littorina littorea
JU062741	0	418	340	363	311	134	530	84	0.744989	0	0.744989	8.41874e-10	P54399	Protein disulfide-isomerase	Drosophila melanogaster
JU062985	0	478	534	1089	534	67	0	84	0.674959	1	1.67496
JU062945	179	179	388	429	178	673	412	84	0.82692	0	0.82692
JU069838	51	448	194	330	579	471	412	83	0.815056	0	0.815056
JU071743	0	299	656	693	311	202	220	83	0.756869	0	0.756869
JU066682	0	568	704	429	713	403	0	83	0.707115	1	1.70711
JU069775	0	29	0	0	0	0	1207	83	0.359113	3	3.35911
JU062778	77	389	534	198	178	336	441	83	0.792518	0	0.792518	4.12901e-09	Q4R5X8	NADH dehydrogenase [ubiquinone] iron-sulfur protein 6, mitochondrial	Macaca fascicularis
JU064422	513	478	291	627	445	202	44	83	0.818624	0	0.818624	1.44549e-08	Q16629	Serine/arginine-rich splicing factor 7	Homo sapiens
JU065831	616	239	267	396	178	202	294	82	0.811153	0	0.811153	1.50068e-25	Q9CQC9	GTP-binding protein SAR1b.	Mus musculus
JU062984	0	29	48	198	0	471	957	81	0.556122	1	1.55612
JU063663	51	59	194	627	89	202	662	81	0.709646	3	3.70965	3.1606e-09	P0CB79	NADH dehydrogenase [ubiquinone] 1 alpha subcomplex subunit 2	Pongo abelii
contig7673	822	329	510	363	89	269	0	81	0.72452	0	0.72452
JU062841	796	568	267	264	222	134	73	81	0.784189	0	0.784189	2.1765e-38	Q91W39	Nuclear receptor coactivator 5	Mus musculus
JU062807	77	538	267	462	401	269	309	80	0.807707	0	0.807707	1.83475e-16	Q6IP73	Nascent polypeptide-associated complex subunit alpha	Xenopus laevis
JU063004	0	448	388	429	267	1279	162	80	0.771563	2	2.77156
JU068682	0	0	0	0	0	67	1163	80	0.353143	3	3.35314
JU067932	0	0	0	33	0	0	1148	79	0.351133	3	3.35113
JU071660	102	119	704	429	222	403	250	78	0.778562	0	0.778562	8.44013e-07	Q9GNE2	60S ribosomal protein L23	Aedes aegypti
JU064089	0	568	485	198	445	1077	103	78	0.753166	0	0.753166	1.11853e-14	P56597	Nucleoside diphosphate kinase homolog 5	Homo sapiens
JU063073	513	688	121	528	356	0	88	78	0.742185	0	0.742185	6.73181e-46	A1A4K8	Splicing factor U2AF 35 kDa subunit	Bos taurus
JU064788	1336	149	243	132	44	0	73	77	0.63735	3	3.63735	6.00646e-21	Q58CU0	Chromatin modification-related protein MEAF6	Bos taurus
JU064339	25	269	121	330	267	0	662	76	0.662746	0	0.662746	1.63741e-50	Q0MQA6	NADH dehydrogenase [ubiquinone] 1 alpha subcomplex subunit 7	Pongo pygmaeus
JU063000	0	389	826	231	401	807	14	76	0.698072	0	0.698072
JU063980	282	359	145	165	222	538	427	76	0.782702	0	0.782702	1.44069e-14	P46782	40S ribosomal protein S5	Homo sapiens
JU070713	0	0	0	0	0	0	1119	76	0.311346	3	3.31135
JU065536	1464	209	97	198	89	0	0	76	0.573525	3	3.57353	1.64386e-64	Q8RWD9	Acyl-CoA-binding domain-containing protein 5	Arabidopsis thaliana
JU062965	0	59	121	330	89	67	824	76	0.596763	2	2.59676
JU062739	1438	239	0	297	89	0	0	75	0.525932	3	3.52593	1.59248e-08	P51986	G2/mitotic-specific cyclin-A.	Hydra viridissima
JU065577	950	389	267	99	267	67	58	75	0.720936	2	2.72094	6.50935e-139	Q8VE97	Serine/arginine-rich splicing factor 4	Mus musculus
JU066502	179	119	485	165	178	202	471	75	0.740802	3	3.7408	1.0242e-50	XP_391899	PREDICTED: hypothetical protein LOC408347 [Apis mellifera].	Apis mellifera
JU066532	0	149	485	594	891	269	117	75	0.723259	0	0.723259
JU065482	1721	29	72	99	44	0	0	75	0.487479	3	3.48748	2.60627e-24	XP_970374	PREDICTED: similar to AGAP010054-PA [Tribolium castaneum].	Tribolium castaneum
JU062922	359	239	340	132	178	134	427	75	0.753947	0	0.753947
JU062697	411	688	267	627	267	0	0	75	0.675733	0	0.675733	1.69263e-10	O88513	Geminin.	Mus musculus
JU064617	719	478	267	396	222	134	0	74	0.704357	0	0.704357	7.89288e-37	Q3B7L6	Serine/arginine-rich splicing factor 6	Bos taurus
JU069370	0	119	413	792	222	673	206	74	0.72006	0	0.72006
JU065679	154	149	315	132	178	67	589	73	0.700549	1	1.70055	4.98509e-34	Q94516	ATP synthase subunit b, mitochondrial	Drosophila melanogaster
JU065207	1104	149	194	429	133	67	0	73	0.641414	2	2.64141	9.87428e-11	Q6PGY5	DnaJ homolog subfamily C member 21	Danio rerio
JU065194	0	359	437	528	445	134	220	73	0.719853	0	0.719853	2.21367e-07	Q6PC91	Transcription factor BTF3 homolog 4	Danio rerio
JU069748	0	598	437	627	579	202	0	73	0.657542	0	0.657542
JU062676	0	239	364	132	311	403	485	73	0.697886	0	0.697886	3.75953e-39	ABW90687	stanniocalcin [Haliotis diversicolor supertexta].	Haliotis diversicolor
JU062876	0	149	801	429	490	673	14	73	0.680859	0	0.680859	3.27637e-06	XP_001626971	predicted protein [Nematostella vectensis].	Nematostella vectensis
JU063632	51	119	315	594	89	202	456	73	0.713432	0	0.713432	1.74077e-07	P07552	Cytochrome b-c1 complex subunit 10	Bos taurus
JU064214	0	29	48	198	133	1750	515	73	0.628932	3	3.62893	2.2992e-07	P85036	Perlinhibin-related protein.	Haliotis laevigata
JU064124	0	329	0	0	178	134	824	73	0.507619	2	2.50762	2.86735e-10	P62184	Calmodulin	Renilla reniformis
JU063943	0	418	510	231	623	538	117	72	0.727466	0	0.727466	5.09138e-36	P41383	Tubulin alpha-2/alpha-4 chain.	Patella vulgata
JU067668	0	478	170	1056	490	134	58	72	0.679764	1	1.67976
JU062784	0	389	485	660	356	336	88	72	0.716552	0	0.716552	6.68937e-59	Q5EB30	Outer dense fiber protein 3	Xenopus (Silurana) tropicalis
JU065415	282	329	437	363	401	134	147	72	0.77744	0	0.77744	1.83588e-58	Q8C854	Myelin expression factor 2	Mus musculus
JU063300	822	538	170	198	222	0	44	71	0.677264	0	0.677264	1.47606e-14	B3MQV3	Eukaryotic translation initiation factor 3 subunit F-1	Drosophila ananassae
JU063196	0	0	0	0	0	0	1045	71	0.300933	3	3.30093	3.95845e-28	AAV91525	calcium binding protein 1 [Biomphalaria glabrata].	Biomphalaria glabrata
JU062875	0	538	583	198	757	403	0	71	0.648691	0	0.648691
JU065794	154	359	291	132	178	134	456	71	0.727092	0	0.727092	1.61843e-147	Q9BMX5	40S ribosomal protein S6.	Aplysia californica
JU063687	0	407	398	486	374	1008	41	71	0.714569	1	1.71457	2.60541e-24	P11833	Tubulin beta chain	Paracentrotus lividus
JU065210	128	119	97	264	579	538	412	70	0.742538	0	0.742538	3.10841e-09	Q6QAT0	60S ribosomal protein L32.	Sus scrofa
JU071588	0	149	218	33	445	269	603	70	0.635773	0	0.635773	3.00649e-07	P19351	Troponin T, skeletal muscle	Drosophila melanogaster
JU066158	282	149	194	297	89	336	441	70	0.73245	0	0.73245	4.27748e-30	Q9Y244	Proteasome maturation protein	Homo sapiens
JU071599	128	209	218	198	44	740	456	70	0.721992	0	0.721992	1.63626e-18	P42026	NADH dehydrogenase [ubiquinone] iron-sulfur protein 7, mitochondrial	Bos taurus
JU062689	642	329	291	165	178	403	103	70	0.75398	0	0.75398	0	O01159	Probable splicing factor, arginine/serine-rich 7	Caenorhabditis elegans
JU064415	205	209	364	495	267	67	265	70	0.746831	0	0.746831	7.29164e-14	Q15369	Transcription elongation factor B polypeptide 1	Homo sapiens
JU064122	25	389	145	264	401	269	412	69	0.720575	0	0.720575	1.38672e-171	P62083	40S ribosomal protein S7	Rattus norvegicus
JU068310	1567	0	0	0	0	0	117	69	0.379956	3	3.37996
JU066648	1104	119	121	132	222	0	117	69	0.637789	3	3.63779
JU066280	128	209	364	231	534	336	265	69	0.762254	0	0.762254	4.92067e-10	XP_001949131	PREDICTED: hypothetical protein LOC100159524 [Acyrthosiphon pisum].	Acyrthosiphon pisum
JU063631	0	389	97	99	757	202	412	68	0.660164	0	0.660164	1.79855e-20	P07291	Myosin essential light chain, striated adductor muscle	Argopecten irradians
JU066222	128	59	97	99	44	1009	559	68	0.657849	0	0.657849	1.30033e-10	XP_001457722	hypothetical protein [Paramecium tetraurelia strain d4-2].	Paramecium tetraurelia strain d4-2
JU063142	693	269	243	231	401	67	58	67	0.714465	0	0.714465	5.66397e-06	A6QR16	RNA-binding protein with serine-rich domain 1.	Bos taurus
JU064857	745	149	243	66	44	202	250	67	0.680486	3	3.68049	1.04896e-12	Q5PQP0	Immediate early response gene 5-like protein.	Rattus norvegicus
JU062813	51	478	534	363	356	0	117	67	0.681374	0	0.681374	1.32521e-145	Q6PB04	Meiosis expressed gene 1 protein homolog.	Xenopus laevis
JU063593	25	0	0	0	0	0	971	67	0.325866	3	3.32587	4.82843e-50	P00787	Cathepsin B	Rattus norvegicus
JU071645	0	299	194	627	222	269	309	67	0.684582	1	1.68458	1.347e-52	Q86FP7	40S ribosomal protein S23.	Dermacentor variabilis
JU064087	128	209	218	396	222	134	397	67	0.721149	2	2.72115	1.97904e-158	P56480	ATP synthase subunit beta, mitochondrial	Mus musculus
JU070554	0	59	170	0	445	67	692	67	0.538475	0	0.538475
JU062719	0	29	24	33	0	0	942	67	0.392839	3	3.39284	1.86938e-22	P21765	Epididymal secretory glutathione peroxidase	Mus musculus
JU063966	231	777	340	528	89	0	0	67	0.616223	0	0.616223	3.19383e-92	P43487	Ran-specific GTPase-activating protein	Homo sapiens
JU062737	0	269	315	264	401	202	353	66	0.680912	0	0.680912	7.03456e-06	P51544	Arginine kinase	Haliotis madaka
JU067956	0	179	24	33	44	605	706	66	0.549218	2	2.54922
scaffold303	488	389	121	231	311	471	117	66	0.748811	0	0.748811	3.09718e-70	Q5F418	26S proteasome non-ATPase regulatory subunit 1	Gallus gallus
JU066009	0	179	24	0	178	67	795	66	0.492767	3	3.49277	1.86219e-09	Q9NZR2	Low-density lipoprotein receptor-related protein 1B	Homo sapiens
JU064793	25	89	218	66	222	269	603	65	0.63522	2	2.63522	5.57948e-22	Q58DW3	60S ribosomal protein L29.	Bos taurus
JU062798	924	149	97	330	222	67	58	65	0.66552	3	3.66552	1.56496e-16	Q62241	U1 small nuclear ribonucleoprotein C	Mus musculus
JU062724	0	299	243	627	356	403	176	65	0.693772	0	0.693772	2.22021e-48	P24733	Myosin heavy chain, striated muscle.	Argopecten irradians
JU066282	924	239	97	132	178	67	117	65	0.666311	3	3.66631	3.92098e-07	XP_001951621	PREDICTED: hypothetical protein LOC100158674 [Acyrthosiphon pisum].	Acyrthosiphon pisum
JU064632	77	119	267	198	534	336	353	65	0.717754	0	0.717754	4.45774e-21	Q3SZ71	Mitochondrial-processing peptidase subunit beta	Bos taurus
JU065614	668	59	170	132	0	875	191	65	0.656053	1	1.65605	8.34271e-10	Q90YV2	60S ribosomal protein L15.	Ictalurus punctatus
JU070080	0	29	0	0	0	0	942	65	0.321411	3	3.32141
JU071615	0	29	170	33	44	134	765	64	0.509688	3	3.50969	1.66873e-34	P86731	Uncharacterized protein 1	Haliotis asinina
JU063321	0	389	413	462	356	807	0	64	0.63439	0	0.63439	8.57382e-15	BAE81787	alginate lyase [Haliotis discus hannai].	Haliotis discus
JU071609	102	688	121	198	445	269	176	64	0.718139	0	0.718139
JU066479	0	89	413	330	757	202	206	64	0.664796	0	0.664796	1.11839e-06	XP_002740285	PREDICTED: predicted protein-like isoform 1 [Saccoglossus kowalevskii].	Saccoglossus kowalevskii
JU063015	770	269	194	99	89	0	162	63	0.63461	2	2.63461
JU062679	0	269	97	132	267	538	471	63	0.640541	0	0.640541	2.09322e-13	ABY87415	unknown protein 24, partial [Haliotis diversicolor].	Haliotis diversicolor
JU063691	25	389	315	363	356	403	162	63	0.718668	0	0.718668
JU063647	0	119	170	363	534	0	427	63	0.60043	0	0.60043	1.81276e-17	P09429	High mobility group protein B1	Homo sapiens
JU071443	0	0	0	0	0	134	898	63	0.32944	3	3.32944
JU063578	0	359	437	330	311	336	162	63	0.680981	0	0.680981	3.97294e-108	O97508	Thioredoxin	Equus caballus
JU062799	359	478	510	99	178	67	58	63	0.680561	0	0.680561	1.02269e-07	Q627N3	Serine/threonine-protein phosphatase PP1-beta	Caenorhabditis briggsae
JU064633	128	418	145	165	178	1009	206	63	0.7242	2	2.7242	5.88481e-68	Q3SZ90	60S ribosomal protein L13a.	Bos taurus
JU071582	205	119	388	363	89	269	265	63	0.70719	0	0.70719	4.28676e-06	O70435	Proteasome subunit alpha type-3	Mus musculus
JU063343	0	269	583	264	623	471	0	62	0.611263	0	0.611263
JU065307	0	0	0	0	0	0	912	62	0.281216	3	3.28122	9.54991e-06	Q7Z0T3	Temptin	Aplysia californica
JU071661	0	59	72	363	133	1279	353	62	0.62331	3	3.62331	7.8797e-08	Q9I930	Fucolectin-2	Anguilla japonica
JU062958	0	389	291	264	44	1009	191	62	0.656318	2	2.65632
JU063783	205	359	218	132	311	134	294	62	0.708001	0	0.708001	5.90862e-08	P23396	40S ribosomal protein S3.	Homo sapiens
JU064132	359	329	291	495	178	134	58	62	0.707457	0	0.707457	5.87994e-24	P62318	Small nuclear ribonucleoprotein Sm D3	Homo sapiens
JU064128	488	179	170	726	89	269	29	62	0.67756	0	0.67756	3.21838e-09	P62308	Small nuclear ribonucleoprotein G	Homo sapiens
JU064142	223	217	288	273	166	178	274	61	0.708143	0	0.708143	6.65049e-07	P62924	Eukaryotic translation initiation factor 5A	Spodoptera exigua
JU067178	0	239	534	429	222	134	162	61	0.646129	0	0.646129
JU071023	0	0	0	0	0	0	898	61	0.278942	3	3.27894
JU064177	77	59	218	198	222	0	530	61	0.601135	2	2.60114	1.20502e-08	P80971	Cytochrome c oxidase subunit 4 isoform 2, mitochondrial	Thunnus obesus
JU063054	0	89	145	231	490	1077	265	61	0.656687	1	1.65669
JU064139	102	119	315	330	178	336	309	61	0.699516	1	1.69952	5.4102e-09	P62866	40S ribosomal protein S30.	Bos taurus
JU071715	0	389	315	264	713	67	147	61	0.650051	0	0.650051
JU064140	231	149	461	231	311	67	191	61	0.69613	0	0.69613	2.42291e-17	P62870	Transcription elongation factor B polypeptide 2	Rattus norvegicus
JU066270	0	149	583	462	0	269	206	61	0.593501	0	0.593501
JU067947	0	329	461	264	490	403	88	61	0.668533	0	0.668533
JU071181	0	119	631	363	490	538	0	60	0.591467	0	0.591467
JU062873	102	329	364	231	133	269	235	60	0.698856	0	0.698856	1.63728e-12	Q9YGQ1	Elongation factor 1-beta	Gallus gallus
JU069185	0	29	48	99	356	403	589	60	0.562443	0	0.562443
JU065586	51	508	291	363	267	269	117	60	0.69986	0	0.69986	3.08211e-12	Q8VIG3	Radial spoke head 1 homolog	Mus musculus
JU068699	1104	59	48	33	133	0	132	60	0.539902	3	3.5399
JU065692	179	209	291	396	356	336	132	60	0.724399	0	0.724399	1.79454e-12	Q95K50	Nucleolar protein 56	Macaca fascicularis
JU063350	0	0	24	0	44	0	839	59	0.341089	3	3.34109
JU062869	102	209	340	297	490	471	103	59	0.714147	0	0.714147	2.93726e-31	Q9W602	FACT complex subunit SSRP1	Xenopus laevis
JU063779	102	359	170	165	267	336	294	59	0.696569	0	0.696569	3.07768e-25	P23004	Cytochrome b-c1 complex subunit 2, mitochondrial	Bos taurus
JU062787	25	0	48	33	0	134	780	59	0.432448	3	3.43245	1.294e-28	Q5R875	Protein disulfide-isomerase TMX3	Pongo abelii
JU065436	154	389	170	132	89	605	265	59	0.691348	0	0.691348	1.81269e-09	Q8ITC3	40S ribosomal protein S19.	Argopecten irradians
scaffold31	0	89	48	0	0	2221	309	59	0.481203	3	3.4812	1.00465e-39	ABY87366	unknown protein 11, partial [Haliotis diversicolor].	Haliotis diversicolor
JU065871	1233	59	72	165	44	0	0	59	0.475371	3	3.47537	1.24302e-13	Q9D7A8	Armadillo repeat-containing protein 1.	Mus musculus
JU065959	0	359	218	231	222	1077	147	59	0.661002	2	2.661	1.8816e-14	Q9LQU4	Protein PLANT CADMIUM RESISTANCE 2	Arabidopsis thaliana
JU067020	822	239	48	330	222	0	29	59	0.59683	2	2.59683
JU067798	231	359	510	231	133	134	73	59	0.681221	0	0.681221
JU062931	0	119	485	429	89	673	147	59	0.63628	0	0.63628
JU063633	154	89	218	363	401	0	294	58	0.641849	0	0.641849	8.75088e-28	P07919	Cytochrome b-c1 complex subunit 6, mitochondrial	Homo sapiens
JU071703	0	0	24	165	0	0	765	58	0.373115	3	3.37312
JU062733	436	269	267	396	222	0	58	58	0.647857	0	0.647857	9.60167e-06	P43332	U1 small nuclear ribonucleoprotein A	Drosophila melanogaster
JU063920	0	0	0	0	0	0	854	58	0.271993	3	3.27199	1.42737e-09	P37842	Multicystatin	Solanum tuberosum
JU064497	0	0	72	66	44	134	736	58	0.451132	3	3.45113	3.4838e-08	Q26636	Cathepsin L	Sarcophaga peregrina
JU064640	0	329	218	231	356	605	206	58	0.661877	0	0.661877	3.16147e-09	Q3SZZ2	X-box-binding protein 1	Bos taurus
JU063786	231	89	97	0	89	67	574	58	0.549682	2	2.54968	3.23053e-22	P23709	NADH dehydrogenase [ubiquinone] iron-sulfur protein 3, mitochondrial	Bos taurus
JU071591	102	149	97	165	222	269	456	58	0.652711	1	1.65271	2.00862e-06	P28070	Proteasome subunit beta type-4	Homo sapiens
JU063053	539	209	218	132	267	134	132	58	0.681836	2	2.68184
JU064961	308	269	267	264	0	269	206	58	0.655374	2	2.65537	5.5269e-14	Q5ZIQ3	Heterogeneous nuclear ribonucleoprotein K	Gallus gallus
JU062825	77	29	267	132	178	0	515	58	0.570131	0	0.570131	1.55425e-08	Q8HXP8	Superoxide dismutase [Cu-Zn].	Callithrix jacchus
JU064002	0	239	170	198	401	269	338	57	0.632865	0	0.632865	3.58108e-21	P49395	40S ribosomal protein S3a	Aplysia californica
JU071638	51	119	97	198	401	269	412	57	0.648423	0	0.648423	4.40701e-06	Q6GNR9	Dolichyl-diphosphooligosaccharide--protein glycosyltransferase 48 kDa subunit	Xenopus laevis
JU069525	25	29	121	990	133	134	220	57	0.597595	3	3.5976
JU071292	0	29	0	0	0	67	809	57	0.33627	3	3.33627
JU065632	102	149	340	198	222	134	309	57	0.666413	0	0.666413	1.95434e-07	Q91WQ9	Calmodulin-like protein 4	Mus musculus
JU066380	0	0	0	0	0	67	824	57	0.302961	3	3.30296	4.2779e-06	XP_002607332	hypothetical protein BRAFLDRAFT_119209 [Branchiostoma floridae].	Branchiostoma floridae
JU062951	0	59	607	198	311	269	191	57	0.611216	0	0.611216
JU065520	102	239	121	429	44	202	323	56	0.6462	0	0.6462	2.59001e-11	Q8QG64	RING-box protein 1	Salmo salar
JU063031	51	299	218	132	133	202	368	56	0.644324	0	0.644324
JU062870	0	239	243	33	222	134	441	56	0.57565	0	0.57565	3.91336e-20	Q9XSK2	CD63 antigen	Bos taurus
JU068301	0	89	218	627	311	942	58	56	0.624239	0	0.624239
JU063275	1310	59	48	33	0	0	0	56	0.391767	3	3.39177	6.20276e-21	ACX37430	vitelline envelope zona pellucida domain protein 20 [Haliotis rufescens].	Haliotis rufescens
JU062996	0	89	170	33	222	942	382	56	0.587669	2	2.58767
JU067191	0	119	583	594	44	269	73	56	0.584924	1	1.58492
JU064941	128	59	243	561	133	336	206	56	0.6659	0	0.6659	2.59412e-11	Q5XH16	NHP2-like protein 1	Xenopus laevis
JU069174	0	29	0	132	89	202	677	56	0.461711	3	3.46171
JU065623	1053	89	170	66	0	134	0	55	0.48606	3	3.48606	5.48277e-14	Q91648	Polycomb complex protein BMI-1-A	Xenopus laevis
JU066052	77	269	170	99	311	403	294	55	0.667055	0	0.667055	5.20967e-12	Q9TTC6	Peptidyl-prolyl cis-trans isomerase A	Oryctolagus cuniculus
JU065122	0	359	413	297	401	67	103	55	0.615472	0	0.615472	2.55226e-06	Q6GMI7	Enolase-phosphatase E1	Danio rerio
JU066310	0	59	583	198	89	67	294	55	0.55886	0	0.55886
JU065292	334	478	267	231	222	134	14	55	0.650608	0	0.650608	2.45172e-11	Q7TNV0	Protein DEK.	Mus musculus
scaffold437	179	209	364	132	222	269	191	55	0.67875	0	0.67875	1.0051e-15	Q86XH1	IQ and AAA domain-containing protein 1.	Homo sapiens
JU063967	77	119	194	495	534	67	162	54	0.650532	2	2.65053	8.02521e-58	P43686	26S protease regulatory subunit 6B	Homo sapiens
JU065291	128	59	170	660	133	0	250	54	0.593702	2	2.5937	9.48269e-14	Q7TNS2	Mitochondrial inner membrane organizing system protein 1.	Mus musculus
JU065743	77	149	364	363	222	0	220	54	0.616689	0	0.616689	2.78399e-50	Q96NC0	Zinc finger matrin-type protein 2.	Homo sapiens
JU071606	0	29	0	33	0	0	765	54	0.32896	3	3.32896	3.47925e-08	P58374	60S ribosomal protein L30.	Branchiostoma belcheri
JU071750	0	239	97	231	1381	202	14	54	0.563356	3	3.56336
JU064715	154	149	315	330	178	67	220	54	0.65452	0	0.65452	1.67993e-18	Q4PM47	40S ribosomal protein S29.	Ixodes scapularis
JU063919	0	29	218	66	401	269	427	54	0.564262	0	0.564262	5.72487e-11	P37397	Calponin-3	Rattus norvegicus
JU063609	0	29	0	0	0	0	780	54	0.295711	3	3.29571	5.62978e-27	P03952	Plasma kallikrein	Homo sapiens
JU064560	0	329	461	363	311	202	44	54	0.610802	0	0.610802	2.70833e-16	Q2KIU7	DnaJ homolog subfamily B member 4.	Bos taurus
JU064561	128	269	364	627	44	67	58	54	0.623872	0	0.623872	2.11964e-29	Q2KIW6	Radial spoke head protein 9 homolog.	Bos taurus
JU071681	0	239	97	198	222	403	368	54	0.605836	0	0.605836
JU065471	25	478	291	132	713	134	44	54	0.628939	0	0.628939	2.22761e-11	Q8K310	Matrin-3.	Mus musculus
JU065878	411	179	437	198	89	67	73	54	0.635389	2	2.63539	3.08211e-12	Q9D845	Testis-expressed sequence 9 protein	Mus musculus
JU064592	77	269	194	297	133	403	220	53	0.664861	0	0.664861	9.16792e-09	Q2YGT9	Programmed cell death protein 2.	Bos taurus
JU067828	0	0	0	33	0	0	765	53	0.293258	3	3.29326
JU066136	0	119	145	396	534	202	235	53	0.611082	0	0.611082	2.38583e-09	Q9W237	40S ribosomal protein S16.	Drosophila melanogaster
JU064645	25	329	145	165	445	336	220	53	0.652634	0	0.652634	1.36233e-12	Q3T0F5	Ras-related protein Rab-7a.	Bos taurus
JU062721	128	119	340	396	44	538	132	53	0.65253	0	0.65253	3.19541e-17	P24051	40S ribosomal protein S27-like.	Rattus norvegicus
JU063016	0	59	243	561	44	67	323	53	0.549634	0	0.549634
JU065760	0	389	97	165	0	0	456	53	0.478902	0	0.478902	8.45081e-15	Q98TF8	60S ribosomal protein L22.	Gallus gallus
scaffold474	385	508	267	132	89	0	58	53	0.597366	0	0.597366	1.58222e-08	Q8K4K5	Lethal(2) giant larvae protein homolog 1	Rattus norvegicus
JU062882	0	598	194	0	178	605	162	52	0.557768	2	2.55777	1.19084e-24	XP_002607772	hypothetical protein BRAFLDRAFT_117319 [Branchiostoma floridae].	Branchiostoma floridae
JU069224	0	89	364	231	579	942	0	52	0.557084	0	0.557084
JU064230	719	149	340	132	44	0	0	52	0.50962	1	1.50962	4.45056e-11	P91753	Mitotic apparatus protein p62.	Lytechinus pictus
JU071658	77	209	267	132	445	134	220	52	0.647979	0	0.647979	2.52176e-27	Q9CPW5	Translocon-associated protein subunit beta	Mus musculus
scaffold10	462	598	48	66	89	134	88	52	0.600724	2	2.60072	9.78694e-11	A2CG63	AT-rich interactive domain-containing protein 4B	Mus musculus
JU066753	0	269	267	363	267	67	206	52	0.600854	0	0.600854
JU065850	205	149	218	429	89	67	206	52	0.636617	2	2.63662	1.16883e-19	Q9CZX9	Transmembrane protein 85.	Mus musculus
JU065156	359	448	24	132	445	134	88	52	0.629988	1	1.62999	5.35831e-09	Q6NV18	Non-homologous end-joining factor 1	Danio rerio
JU063359	256	149	267	297	267	336	88	52	0.673186	0	0.673186	4.94226e-15	EFN83877	Serine-enriched protein [Harpegnathos saltator].	Harpegnathos saltator
JU062888	25	119	218	297	89	740	220	51	0.628734	2	2.62873	1.70481e-84	XP_308877	AGAP006879-PA [Anopheles gambiae str. PEST].	Anopheles gambiae str. PEST
JU062753	0	119	24	0	0	134	647	51	0.39456	3	3.39456	1.75358e-34	P86734	Ependymin-related protein 1	Haliotis asinina
JU064477	77	568	194	198	178	202	117	51	0.640344	3	3.64034	4.74445e-28	Q24572	Probable histone-binding protein Caf1	Drosophila melanogaster
JU063748	282	149	194	165	133	202	235	51	0.645771	0	0.645771	1.81629e-22	P19804	Nucleoside diphosphate kinase B	Rattus norvegicus
JU062896	77	119	170	132	44	134	441	51	0.581062	3	3.58106
JU063944	668	179	194	264	89	0	14	51	0.557821	2	2.55782	3.47633e-24	P41384	Cyclin-dependent kinases regulatory subunit	Patella vulgata
JU064526	205	89	315	231	178	0	235	51	0.600423	0	0.600423	2.34677e-20	Q293Y0	Translationally-controlled tumor protein homolog	Drosophila pseudoobscura
JU064583	1258	29	24	0	0	0	0	51	0.321421	3	3.32142	6.63311e-36	Q2TBI6	CWF19-like protein 2.	Homo sapiens
JU066085	0	0	0	0	0	0	750	51	0.255046	3	3.25505	2.88071e-10	Q9UM22	Mammalian ependymin-related protein 1	Homo sapiens
JU071422	0	0	0	0	0	134	706	50	0.297941	3	3.29794
JU066218	0	0	0	33	0	202	677	50	0.339797	3	3.3398	1.09934e-22	XP_001201015	PREDICTED: hypothetical protein, partial [Strongylocentrotus purpuratus].	Strongylocentrotus purpuratus
JU062808	513	359	170	297	89	0	0	50	0.535575	0	0.535575	1.75541e-07	Q6IQU4	Protein CWC15 homolog.	Danio rerio
JU065204	25	0	72	99	222	269	500	50	0.518967	0	0.518967	2.98527e-07	Q6PF69	Major vault protein	Xenopus laevis
JU063706	25	119	315	132	356	202	250	50	0.617467	0	0.617467	6.95192e-17	P13804	Electron transfer flavoprotein subunit alpha, mitochondrial	Homo sapiens
JU062886	0	149	291	429	44	134	250	50	0.565817	0	0.565817	4.58281e-40	XP_002838964	hypothetical protein [Tuber melanosporum Mel28].	Tuber melanosporum
JU062918	0	119	485	561	178	0	73	50	0.529671	1	1.52967
JU063938	282	179	291	66	623	202	29	50	0.6261	1	1.6261	9.483e-141	P41073	Zinc finger protein on ecdysone puffs.	Drosophila melanogaster
JU071673	154	149	267	132	222	202	220	49	0.63727	0	0.63727	2.64466e-08	XP_002416528	conserved hypothetical protein [Ixodes scapularis].	Ixodes scapularis
JU069086	822	119	0	198	44	202	44	49	0.520403	3	3.5204
JU068493	0	149	0	0	401	134	485	49	0.442671	1	1.44267
JU064149	0	0	0	1617	0	0	0	49	0.250002	3	3.25	6.33582e-18	P70032	Serine/threonine-protein kinase PLK1	Xenopus laevis
JU071569	0	239	413	594	0	134	58	49	0.521721	0	0.521721	1.12382e-14	ABW04628	metallothionein [Haliotis diversicolor supertexta].	Haliotis diversicolor
JU063345	693	239	145	165	0	67	29	49	0.540118	2	2.54012	6.33259e-166	CAQ15431	coilin p80 [Danio rerio].	Danio rerio
JU068969	0	119	243	165	178	269	323	49	0.574589	0	0.574589
JU062997	256	239	170	264	89	134	162	48	0.628945	0	0.628945
JU065704	179	179	170	297	0	202	235	48	0.58833	2	2.58833	5.47329e-09	Q96253	ATP synthase subunit epsilon, mitochondrial	Arabidopsis thaliana
JU066193	25	179	97	165	178	336	338	48	0.59705	0	0.59705	1.69121e-10	Q9YHT2	Succinate dehydrogenase [ubiquinone] iron-sulfur subunit, mitochondrial	Gallus gallus
JU071748	0	359	194	627	401	0	0	48	0.487555	0	0.487555
JU062692	0	29	0	33	0	67	662	48	0.346702	3	3.3467	8.68957e-15	O42401	Matrilin-3	Gallus gallus
JU066151	205	329	72	132	222	67	235	48	0.611168	0	0.611168	2.36711e-24	Q9XT06	T-complex protein 1 subunit alpha	Monodelphis domestica
JU065954	25	269	267	198	401	202	132	48	0.624927	0	0.624927	2.45786e-14	Q9JLR1	Protein transport protein Sec61 subunit alpha isoform 2	Mus musculus
JU066125	462	269	72	264	133	134	58	47	0.605357	0	0.605357	4.88918e-10	Q9VJ38	39S ribosomal protein L13, mitochondrial	Drosophila melanogaster
JU066403	0	89	121	33	579	538	250	47	0.554486	0	0.554486	2.88843e-15	XP_002613925	hypothetical protein BRAFLDRAFT_98499 [Branchiostoma floridae].	Branchiostoma floridae
scaffold64	308	119	291	264	267	67	58	47	0.614509	2	2.61451	2.4644e-06	O60264	SWI/SNF-related matrix-associated actin-dependent regulator of chromatin subfamily A member 5	Homo sapiens
JU063012	0	29	0	0	0	67	662	47	0.310992	3	3.31099
JU064648	128	179	243	231	178	336	147	47	0.638998	0	0.638998	1.43676e-06	Q3T102	Eukaryotic translation initiation factor 3 subunit E	Bos taurus
JU063690	0	149	97	33	178	0	485	47	0.463589	2	2.46359	2.26427e-31	P12026	Acyl-CoA-binding protein	Sus scrofa
JU066244	0	359	170	0	178	807	176	47	0.53707	1	1.53707	6.15366e-29	XP_001630534	predicted protein, partial [Nematostella vectensis].	Nematostella vectensis
JU063641	0	89	24	0	133	67	574	47	0.418189	3	3.41819	0	P08472	Mesenchyme-specific cell surface glycoprotein	Strongylocentrotus purpuratus
JU064338	0	0	0	0	0	0	692	47	0.244839	3	3.24484
JU066079	0	149	340	297	445	202	88	47	0.582891	0	0.582891	7.01428e-26	Q9UL16	Coiled-coil domain-containing protein 19, mitochondrial	Homo sapiens
JU062972	0	89	97	198	668	740	103	46	0.572048	2	2.57205
JU066030	873	89	194	0	0	0	14	46	0.406829	3	3.40683	8.22131e-26	Q9QY94	Glutamine synthetase	Acomys cahirinus
JU062762	25	89	194	33	44	67	456	46	0.504604	2	2.5046	1.37046e-17	Q0MQJ3	NADH dehydrogenase [ubiquinone] 1 beta subcomplex subunit 11, mitochondrial	Pongo pygmaeus
JU065666	334	149	48	66	178	269	235	46	0.595354	0	0.595354	6.75618e-12	Q92747	Actin-related protein 2/3 complex subunit 1A	Homo sapiens
contig9409	1181	0	0	0	0	0	0	46	0.242224	3	3.24222
JU062877	565	29	218	198	133	67	58	46	0.56684	2	2.56684	4.21962e-06	XP_001631026	predicted protein, partial [Nematostella vectensis].	Nematostella vectensis
JU062867	0	89	97	99	267	202	397	46	0.530075	0	0.530075	4.87261e-10	Q9VXK0	Protein NipSnap.	Drosophila melanogaster
JU062968	0	59	291	33	89	403	338	46	0.519178	0	0.519178
JU063391	0	329	218	528	311	134	14	46	0.549125	0	0.549125	4.88199e-18	NP_001191578	pannexin 3 [Aplysia californica].	Aplysia californica
JU069365	0	448	291	0	311	202	132	46	0.525515	0	0.525515
JU071062	0	239	170	330	267	673	58	45	0.580318	1	1.58032
JU063543	102	209	218	99	89	67	279	45	0.576823	0	0.576823	1.50142e-39	O76756	40S ribosomal protein S8.	Apis mellifera
JU071617	385	179	97	66	267	269	117	45	0.607673	0	0.607673	6.66665e-166	Q08DA8	Cyclic AMP-dependent transcription factor ATF-1	Bos taurus
JU065800	976	89	24	33	89	0	0	45	0.403961	3	3.40396	1.36674e-73	Q9BSW2	EF-hand calcium-binding domain-containing protein 4B	Homo sapiens
JU064498	0	0	0	0	0	0	662	45	0.239582	3	3.23958	2.32099e-28	Q26636	Cathepsin L	Sarcophaga peregrina
JU062700	77	89	194	0	0	0	456	45	0.423606	2	2.42361	6.92842e-12	P00357	Glyceraldehyde-3-phosphate dehydrogenase	Homarus americanus
JU070095	0	209	340	297	178	0	162	45	0.525138	0	0.525138
JU063889	0	59	194	66	133	336	368	45	0.522307	0	0.522307	2.52147e-19	P33198	Isocitrate dehydrogenase [NADP], mitochondrial	Sus scrofa
JU063570	411	119	97	33	44	134	235	44	0.550532	0	0.550532	7.71876e-40	O95995	Growth arrest-specific protein 8	Homo sapiens
JU071573	0	59	24	0	0	67	589	44	0.3478	3	3.3478	1.67604e-26	BAE81787	alginate lyase [Haliotis discus hannai].	Haliotis discus
JU065708	77	359	121	165	267	336	117	44	0.61366	0	0.61366	9.76186e-29	Q963B6	60S ribosomal protein L10a.	Spodoptera frugiperda
JU064340	51	59	121	132	222	134	353	44	0.557619	0	0.557619	7.76461e-40	Q0MQE9	NADH dehydrogenase [ubiquinone] 1 beta subcomplex subunit 9	Gorilla gorilla
JU069968	154	389	170	132	89	134	147	44	0.596115	3	3.59612
JU065201	25	329	145	330	133	202	147	44	0.591248	0	0.591248	1.27011e-10	Q6PDQ2	Chromodomain-helicase-DNA-binding protein 4	Mus musculus
JU068324	1027	59	0	0	89	0	0	44	0.326873	3	3.32687
JU069274	0	29	97	132	490	471	250	44	0.538756	0	0.538756
JU065015	0	239	121	66	222	134	323	44	0.529257	0	0.529257	2.65046e-51	Q63362	NADH dehydrogenase [ubiquinone] 1 alpha subcomplex subunit 5	Rattus norvegicus
JU063403	77	29	145	66	89	269	382	44	0.539594	0	0.539594	0	O01666	ATP synthase subunit gamma, mitochondrial	Drosophila melanogaster
JU062963	0	59	145	66	222	202	382	44	0.512305	0	0.512305
JU063252	0	209	121	132	133	471	265	44	0.553639	0	0.553639	1.97719e-35	ABY87401	troponin T, partial [Haliotis diversicolor].	Haliotis diversicolor
JU071330	334	209	194	99	222	134	88	44	0.603946	0	0.603946
JU071665	179	179	267	198	222	67	117	44	0.604453	0	0.604453	3.7425e-18	Q9W6H5	SUMO-conjugating enzyme UBC9-A	Danio rerio
JU065258	77	239	243	33	44	0	294	43	0.507007	1	1.50701	1.58301e-13	Q794C0	V-type proton ATPase subunit e 1	Rattus norvegicus
JU062953	0	89	194	99	44	336	338	43	0.511627	0	0.511627
JU062759	25	119	170	132	133	269	294	43	0.56609	0	0.56609	3.77919e-15	Q07837	Neutral and basic amino acid transport protein rBAT	Homo sapiens
JU066750	25	269	388	132	222	67	103	43	0.567211	0	0.567211
JU065257	51	299	145	297	401	67	88	43	0.58841	0	0.58841	2.6816e-138	Q792H5	CUGBP Elav-like family member 2	Rattus norvegicus
JU062786	128	209	340	132	89	0	162	43	0.548364	0	0.548364	2.88143e-60	Q5MGD1	60S ribosomal protein L17.	Lonomia obliqua
JU062919	0	0	48	0	133	0	559	43	0.33253	3	3.33253
JU065303	77	119	121	165	133	67	323	43	0.558099	2	2.5581	3.88814e-09	Q7YRK2	Cytochrome c oxidase subunit 6C	Macaca silenus
JU062978	0	89	388	66	579	605	0	43	0.491137	0	0.491137
JU066091	0	209	218	297	133	67	206	43	0.539973	0	0.539973	9.87359e-11	Q9UNL2	Translocon-associated protein subunit gamma	Homo sapiens
JU071657	0	149	0	0	133	67	500	43	0.385675	3	3.38567	6.94821e-72	Q9BTY2	Plasma alpha-L-fucosidase	Homo sapiens
JU065504	0	29	24	0	44	134	559	43	0.377803	3	3.3778	1.13098e-06	Q8N6F8	Williams-Beuren syndrome chromosomal region 27 protein.	Homo sapiens
JU063020	205	119	170	33	89	202	265	43	0.566529	0	0.566529
JU063939	51	359	121	33	133	134	265	43	0.553679	0	0.553679	1.18455e-49	P41115	40S ribosomal protein S11.	Xenopus laevis
JU064626	0	119	24	99	0	0	515	43	0.380284	3	3.38028	1.6631e-26	Q3MHY1	Cysteine and glycine-rich protein 1	Bos taurus
JU067638	0	59	0	0	44	67	574	43	0.344956	3	3.34496
JU062706	0	0	24	0	44	0	589	42	0.297332	3	3.29733	1.0929e-09	P07688	Cathepsin B	Bos taurus
JU071742	0	0	0	33	44	0	589	42	0.297324	3	3.29732
JU062859	334	149	97	264	178	67	103	42	0.582722	0	0.582722	1.07844e-41	Q9JMG6	TCF3 fusion partner homolog	Rattus norvegicus
JU063171	0	0	48	0	0	0	589	42	0.276396	3	3.2764	1.00043e-15	A8XWX5	Chondroitin proteoglycan 2	Caenorhabditis briggsae
JU064118	385	119	121	99	44	67	191	42	0.551681	2	2.55168	2.95753e-07	P61759	Prefoldin subunit 3	Mus musculus
JU066634	0	149	437	264	178	471	0	42	0.498315	0	0.498315
JU063807	0	179	170	132	133	67	309	42	0.51463	0	0.51463	3.30078e-11	P24733	Myosin heavy chain, striated muscle.	Argopecten irradians
JU063213	0	0	0	0	0	0	618	42	0.231453	3	3.23145	9.42932e-06	ABB76764	vdg3 [Mytilus edulis].	Mytilus edulis
JU070516	0	0	0	0	0	0	618	42	0.231453	3	3.23145
JU064130	179	359	194	264	222	134	0	42	0.550596	0	0.550596	4.21678e-06	P62314	Small nuclear ribonucleoprotein Sm D1	Homo sapiens
JU065231	77	179	97	66	133	740	191	42	0.580355	3	3.58036	2.09577e-13	Q6Y263	60S ribosomal protein L24.	Pagrus major
JU062776	668	179	48	198	89	0	0	42	0.458073	3	3.45807	1.59974e-13	Q3SZU0	Gametocyte-specific factor 1	Bos taurus
JU063250	0	59	24	0	0	673	427	42	0.39147	1	1.39147	1.9351e-11	ABY87378	predicted protein 2 [Haliotis diversicolor].	Haliotis diversicolor
JU064104	0	179	194	165	222	605	132	42	0.562487	2	2.56249	6.98024e-68	P60517	Gamma-aminobutyric acid receptor-associated protein	Rattus norvegicus
JU062957	0	29	0	0	44	67	574	42	0.330168	3	3.33017
JU071683	0	0	24	0	0	134	574	42	0.309243	3	3.30924
JU068395	179	359	145	198	44	67	132	42	0.571727	1	1.57173
JU070794	0	29	437	132	222	67	191	42	0.502974	0	0.502974
JU071590	77	89	145	99	311	202	235	41	0.572294	0	0.572294	5.13944e-12	P26043	Radixin	Mus musculus
JU064829	25	119	145	462	356	0	117	41	0.53031	0	0.53031	8.41653e-10	Q5F3Z3	Ubiquitin-conjugating enzyme E2 variant 2.	Gallus gallus
JU066061	25	0	145	66	89	740	279	41	0.498343	2	2.49834	1.88541e-54	XP_002156354	PREDICTED: similar to predicted protein [Hydra magnipapillata].	Hydra magnipapillata
JU062900	308	239	24	231	178	336	58	41	0.577667	0	0.577667
JU062720	0	209	145	33	89	134	338	41	0.489973	0	0.489973	1.18031e-16	P22488	Non-neuronal cytoplasmic intermediate filament protein	Helix aspersa
JU063204	0	0	0	0	0	0	603	41	0.228685	3	3.22869	8.98594e-20	AAX11342	developmentally-regulated vdg1 [Haliotis asinina].	Haliotis asinina
JU066537	0	89	72	132	89	269	368	41	0.495658	0	0.495658
JU069508	0	89	72	66	401	134	323	41	0.499394	0	0.499394
JU067693	1027	0	0	0	0	0	14	41	0.261565	3	3.26157
JU066342	0	0	996	0	0	0	0	41	0.228682	3	3.22868	1.67671e-47	XP_002592001	hypothetical protein BRAFLDRAFT_79590 [Branchiostoma floridae].	Branchiostoma floridae
scaffold571	590	119	194	99	89	0	14	41	0.491776	2	2.49178	1.0929e-09	Q9DE27	RuvB-like 2	Xenopus laevis
JU069301	796	89	24	66	133	0	14	41	0.444484	3	3.44448
JU066707	0	269	364	198	311	269	0	41	0.498849	1	1.49885
JU063903	0	0	24	0	0	67	574	41	0.294453	3	3.29445	1.60946e-21	P35003	Chymotrypsin-like serine proteinase	Haliotis rufescens
JU065898	179	269	291	66	44	0	147	41	0.52449	0	0.52449	7.07781e-09	Q9EQX9	Ubiquitin-conjugating enzyme E2 N	Rattus norvegicus
JU062847	513	59	72	99	89	134	132	41	0.542056	3	3.54206	1.45504e-30	Q99KI0	Aconitate hydratase, mitochondrial	Mus musculus
JU065116	25	149	170	231	89	202	220	40	0.555277	0	0.555277	1.22885e-21	Q6F482	60S ribosomal protein L39.	Plutella xylostella
JU068639	0	89	24	66	133	807	279	40	0.489359	2	2.48936
JU062838	0	89	218	132	0	0	353	40	0.415416	0	0.415416	1.83375e-09	Q90339	Myosin heavy chain, fast skeletal muscle.	Cyprinus carpio
JU063086	102	239	218	99	267	67	132	40	0.5718	0	0.5718	5.86688e-11	A2AC93	Dynein intermediate chain 2, axonemal	Mus musculus
scaffold264	77	89	170	132	44	67	309	40	0.524761	1	1.52476	5.66553e-06	Q3SZB4	Medium-chain specific acyl-CoA dehydrogenase, mitochondrial	Bos taurus
JU064630	385	149	72	231	89	269	58	40	0.567911	0	0.567911	7.1282e-06	Q3SYV5	Tetraspanin-33	Bos taurus
JU063486	51	119	170	297	89	202	191	40	0.564728	0	0.564728	9.50949e-06	O46160	60S ribosomal protein L14.	Lumbricus rubellus
JU063580	0	269	24	66	133	67	353	40	0.465906	0	0.465906	2.7445e-90	O97725	NADH dehydrogenase [ubiquinone] 1 alpha subcomplex subunit 12	Bos taurus
JU062835	0	119	97	132	178	0	353	40	0.460679	0	0.460679	3.44303e-20	Q8SQG9	Na(+)/H(+) exchange regulatory cofactor NHE-RF2	Oryctolagus cuniculus
JU067867	51	269	170	132	356	67	132	40	0.567444	0	0.567444
JU066328	77	119	194	165	89	269	206	40	0.569727	0	0.569727	2.82685e-34	XP_002572450	hypothetical protein [Schistosoma mansoni].	Schistosoma mansoni
JU064975	0	0	0	0	89	0	559	40	0.270656	3	3.27066	3.85286e-07	Q5ZL43	1,2-dihydroxy-3-keto-5-methylthiopentene dioxygenase	Gallus gallus
JU070377	77	149	291	33	222	403	117	40	0.5695	0	0.5695
scaffold328	0	987	48	0	178	67	0	40	0.362798	3	3.3628	2.28484e-46	Q5T655	Coiled-coil domain-containing protein 147.	Homo sapiens
JU063742	0	149	267	231	44	134	206	40	0.512647	0	0.512647	1.71003e-27	P18445	60S ribosomal protein L27a.	Rattus norvegicus
JU064646	359	329	121	165	89	134	14	40	0.548483	0	0.548483	1.03069e-12	Q3T0I4	THO complex subunit 4	Bos taurus
JU064100	102	269	194	297	133	202	44	39	0.572364	0	0.572364	7.8205e-16	P59910	DnaJ homolog subfamily B member 13	Homo sapiens
JU063147	25	89	194	165	133	269	220	39	0.550092	0	0.550092	2.868e-18	A7MC64	Reticulon-1.	Xenopus (Silurana) tropicalis
JU070379	0	29	0	0	44	67	530	39	0.321432	3	3.32143
JU069828	0	359	121	264	401	336	0	39	0.491607	0	0.491607
JU063119	0	239	194	33	133	67	265	39	0.486843	0	0.486843	4.86442e-10	A5PK63	40S ribosomal protein S17.	Bos taurus
JU065862	51	59	315	231	311	67	103	39	0.548968	0	0.548968	3.90531e-15	Q9D3W5	Leucine-rich repeat-containing protein 71.	Mus musculus
JU069921	0	0	0	0	44	0	559	39	0.255885	3	3.25588
JU065016	128	149	291	264	178	67	58	39	0.563021	0	0.563021	2.51041e-06	Q63528	Replication protein A 32 kDa subunit	Rattus norvegicus
JU065338	282	269	145	198	178	202	0	39	0.53384	1	1.53384	4.30989e-41	Q803P1	Eukaryotic translation initiation factor 3 subunit J-B	Danio rerio
JU065982	668	179	48	165	0	0	0	39	0.39995	3	3.39995	3.76648e-10	Q9NK54	Protein chiffon.	Drosophila melanogaster
JU063584	77	119	48	165	267	67	265	39	0.538374	0	0.538374	3.12171e-25	P00125	Cytochrome c1, heme protein, mitochondrial	Bos taurus
JU064955	0	359	72	264	178	202	132	39	0.527017	0	0.527017	5.27316e-12	Q5ZHP3	UPF0468 protein C16orf80 homolog.	Gallus gallus
JU062701	0	0	0	0	0	0	574	39	0.223028	3	3.22303	3.68952e-19	P00765	Trypsin-1	Astacus astacus
JU063487	0	179	97	165	311	202	206	39	0.528731	0	0.528731
JU069502	0	209	145	165	222	134	206	39	0.525798	2	2.5258
JU064159	0	119	170	330	222	67	162	38	0.512907	0	0.512907	5.37623e-40	XP_001637863	predicted protein [Nematostella vectensis].	Nematostella vectensis
JU064029	334	119	121	0	133	134	162	38	0.510897	1	1.5109	2.62755e-08	P51544	Arginine kinase	Haliotis madaka
JU070178	154	149	97	363	311	134	44	38	0.564108	0	0.564108
JU071564	25	209	170	264	267	134	103	38	0.558216	0	0.558216	4.90248e-26	A1XQU9	40S ribosomal protein S20.	Sus scrofa
JU064049	25	149	145	231	133	538	117	38	0.561466	2	2.56147	8.58824e-23	P52809	60S ribosomal protein L44	Cyberlindnera jadinii
scaffold310	51	119	218	165	445	336	44	38	0.563625	0	0.563625	1.63504e-29	Q5NVI3	Protein Red	Pongo abelii
JU062746	77	119	170	198	445	336	44	38	0.569947	0	0.569947
JU065548	77	269	97	231	222	67	132	38	0.557654	0	0.557654	2.33799e-12	Q8TBZ9	Uncharacterized protein C7orf62.	Homo sapiens
JU065780	51	0	121	396	178	202	176	38	0.511105	0	0.511105	2.93688e-07	Q99LX8	Dolichyl-diphosphooligosaccharide--protein glycosyltransferase subunit 4.	Mus musculus
JU064692	25	119	48	0	222	67	368	38	0.451804	0	0.451804	1.60808e-13	Q42972	Malate dehydrogenase, glyoxysomal	Oryza sativa Japonica Group
JU065211	154	149	97	99	89	67	250	38	0.534103	1	1.5341	1.03281e-28	Q6QMZ8	60S ribosomal protein L11.	Chinchilla lanigera
JU070069	976	0	0	0	0	0	0	38	0.220159	3	3.22016
JU064394	950	0	24	0	0	0	0	38	0.25296	3	3.25296	7.40294e-38	Q13772	Nuclear receptor coactivator 4	Homo sapiens
JU064605	25	59	194	330	133	67	191	38	0.526514	0	0.526514	1.44581e-14	Q32P84	tRNA (guanine(37)-N1)-methyltransferase	Homo sapiens
JU069220	0	0	0	0	0	67	544	38	0.252951	3	3.25295
JU066175	25	59	24	330	44	740	176	38	0.512767	2	2.51277	4.21515e-113	Q9Y3U8	60S ribosomal protein L36.	Homo sapiens
JU065665	0	209	170	198	267	269	117	38	0.536388	0	0.536388	2.21665e-18	Q92626	Peroxidasin homolog	Homo sapiens
JU071635	359	149	121	264	0	0	88	38	0.481843	0	0.481843	3.31489e-31	Q5ZHV2	N-alpha-acetyltransferase 35, NatC auxiliary subunit	Gallus gallus
JU064031	0	59	0	0	44	134	485	38	0.341883	3	3.34188	1.46247e-06	P51637	Caveolin-3	Mus musculus
JU069656	0	0	923	0	0	0	0	38	0.220154	3	3.22015
JU062766	51	179	72	66	133	0	323	38	0.47973	0	0.47973	7.67882e-12	Q16534	Hepatic leukemia factor.	Homo sapiens
JU065294	77	0	413	165	178	67	117	38	0.497114	2	2.49711	3.71922e-63	Q7TQ16	Cytochrome b-c1 complex subunit 8	Rattus norvegicus
JU064146	231	119	243	99	89	0	147	38	0.516797	0	0.516797	8.09737e-21	P63208	S-phase kinase-associated protein 1	Homo sapiens
scaffold450	51	0	48	0	178	202	397	38	0.419875	0	0.419875	1.97145e-07	Q8BMS1	Trifunctional enzyme subunit alpha, mitochondrial	Mus musculus
JU069953	0	0	24	33	0	605	397	38	0.364132	2	2.36413
JU064271	25	239	121	462	44	67	103	37	0.516184	1	1.51618	2.87606e-10	Q02366	NADH dehydrogenase [ubiquinone] 1 alpha subcomplex subunit 6	Bos taurus
JU068498	0	89	97	0	44	538	309	37	0.433714	0	0.433714
JU064496	0	0	0	33	0	0	530	37	0.250003	3	3.25	7.98783e-21	Q26636	Cathepsin L	Sarcophaga peregrina
JU071202	359	598	24	33	44	0	0	37	0.400512	1	1.40051
JU064891	642	119	72	0	222	0	0	37	0.391731	2	2.39173	3.855e-08	Q5RC80	RNA-binding protein 39	Pongo abelii
JU069865	0	0	0	0	0	0	544	37	0.217243	3	3.21724
JU065405	256	239	170	231	133	0	29	37	0.515289	0	0.515289	2.98415e-07	Q8BTI8	Serine/arginine repetitive matrix protein 2.	Mus musculus
JU071221	719	119	0	99	44	0	14	37	0.393688	3	3.39369
JU064707	51	119	170	198	89	202	191	37	0.545051	0	0.545051	1.212e-08	Q4GXP2	40S ribosomal protein S21.	Biphyllus lunatus
JU070270	0	59	24	132	222	134	338	37	0.459277	0	0.459277
JU063585	231	29	218	132	89	269	117	37	0.54436	0	0.54436	2.1873e-60	P00129	Cytochrome b-c1 complex subunit 7	Bos taurus
JU063941	0	89	413	363	0	336	14	37	0.443117	2	2.44312	2.28403e-39	P41383	Tubulin alpha-2/alpha-4 chain.	Patella vulgata
JU070719	0	209	121	330	356	134	73	37	0.518655	0	0.518655
JU066068	179	149	72	198	133	67	176	37	0.544968	0	0.544968	3.31057e-06	Q9UBQ5	Eukaryotic translation initiation factor 3 subunit K	Homo sapiens
JU063724	51	149	145	132	311	202	147	37	0.558558	0	0.558558	1.63384e-18	P15870	Histone H1-delta.	Strongylocentrotus purpuratus
JU063360	513	59	218	33	0	0	73	37	0.432916	2	2.43292	8.62817e-07	EFN86717	UPF0545 protein C22orf39-like protein, partial [Harpegnathos saltator].	Harpegnathos saltator
JU063156	539	59	24	330	44	67	14	37	0.469933	0	0.469933	3.69254e-147	A7Y2X0	Sodium- and chloride-dependent glycine transporter 2	Xenopus laevis
JU069016	0	29	0	0	44	0	515	37	0.282712	3	3.28271
JU064426	0	59	48	66	0	67	441	37	0.382823	3	3.38282	1.757e-20	Q16829	Dual specificity protein phosphatase 7	Homo sapiens
JU068583	0	29	0	33	0	0	515	37	0.282693	3	3.28269
JU065009	51	89	121	99	89	134	279	36	0.510794	2	2.51079	1.81189e-12	Q62425	NADH dehydrogenase [ubiquinone] 1 alpha subcomplex subunit 4	Mus musculus
contig15	25	448	145	264	89	67	44	36	0.510642	0	0.510642	9.72491e-67	A1XQU9	40S ribosomal protein S20.	Sus scrofa
JU063135	0	239	194	165	178	269	103	36	0.519252	0	0.519252	1.38197e-25	A6QLU8	Nucleoredoxin.	Bos taurus
JU071656	179	299	121	297	44	67	44	36	0.52775	0	0.52775	2.72607e-07	Q99615	DnaJ homolog subfamily C member 7	Homo sapiens
scaffold616	25	119	97	132	89	134	279	36	0.506696	2	2.5067	2.29817e-12	Q9UHY8	Fasciculation and elongation protein zeta-2	Homo sapiens
JU070103	0	0	24	99	89	471	338	36	0.413855	1	1.41385
JU063346	51	179	145	165	222	67	162	36	0.539363	0	0.539363	1.25689e-18	CAX51443	hypothetical protein, partial [Opisthacanthus cayaporum].	Opisthacanthus cayaporum
JU068262	77	119	145	33	133	403	191	36	0.534608	2	2.53461
JU063225	25	0	48	0	0	0	485	36	0.291397	3	3.2914	1.18273e-08	ABO26606	putative glutathione-s-transferase [Haliotis discus discus].	Haliotis discus
JU064544	0	209	72	198	267	471	103	36	0.520304	0	0.520304	1.64893e-34	Q2HJB8	Tubulin alpha-8 chain	Bos taurus
JU068018	770	59	0	99	44	0	0	36	0.343694	3	3.34369
JU064265	0	149	72	0	356	202	250	36	0.451855	0	0.451855	1.22525e-45	Q01603	Peroxidase	Drosophila melanogaster
JU062783	0	89	194	297	311	471	29	36	0.509492	0	0.509492	9.22958e-09	Q5E9X6	SPRY domain-containing SOCS box protein 1	Bos taurus
contig7137	924	0	0	0	0	0	0	36	0.214285	3	3.21429
scaffold169	308	0	170	66	89	0	191	36	0.447986	0	0.447986	1.66851e-19	P56701	26S proteasome non-ATPase regulatory subunit 2	Bos taurus
JU062781	51	239	97	33	222	134	206	36	0.52266	0	0.52266	4.06808e-09	Q568W0	Selenoprotein W	Danio rerio
JU063006	385	269	24	132	89	0	73	36	0.48296	0	0.48296
JU071678	282	179	97	66	178	67	117	36	0.536009	0	0.536009
contig4072	899	0	0	0	0	0	14	36	0.246972	3	3.24697
JU063744	0	239	72	33	178	134	265	36	0.47203	0	0.47203	5.78263e-11	P19139	Casein kinase II subunit alpha	Rattus norvegicus
scaffold439	179	119	291	99	267	0	58	36	0.510393	0	0.510393	8.43074e-15	Q86Y56	HEAT repeat-containing protein 2.	Homo sapiens
JU065352	0	0	24	0	0	0	515	36	0.246997	3	3.247	6.96056e-17	Q83F39	L-threonine 3-dehydrogenase.	Coxiella burnetii
scaffold138	179	359	121	132	267	67	14	36	0.528359	0	0.528359	3.32699e-11	Q7QHW5	Armadillo segment polarity protein.	Anopheles gambiae
JU063971	51	209	218	198	178	134	88	36	0.549	0	0.549	2.11543e-32	P46405	40S ribosomal protein S12.	Sus scrofa
JU066104	25	89	48	99	267	0	294	35	0.457169	2	2.45717	1.28354e-10	Q9V429	Thioredoxin-2	Drosophila melanogaster
JU062804	179	269	121	231	133	0	58	35	0.509289	0	0.509289	3.32053e-06	Q6DRH5	H/ACA ribonucleoprotein complex subunit 3	Danio rerio
JU065914	128	59	243	363	44	67	73	35	0.513052	0	0.513052	8.59456e-07	Q9GNQ1	18 kDa learning-associated protein of slug.	Limax marginatus
JU065107	668	29	24	66	44	0	58	35	0.411192	3	3.41119	4.97787e-46	Q6DIC0	Probable global transcription activator SNF2L2	Mus musculus
JU065358	0	0	0	0	44	0	500	35	0.243974	3	3.24397	1.30071e-07	Q86IV5	Countin-1	Dictyostelium discoideum
JU067098	0	0	0	0	0	134	485	35	0.255662	3	3.25566
contig1196	565	179	48	33	133	67	0	35	0.438782	3	3.43878
JU062910	0	299	485	165	0	0	0	35	0.352507	0	0.352507
JU070210	0	89	48	165	133	807	147	35	0.490738	3	3.49074
JU065540	179	239	72	66	267	202	88	35	0.54468	0	0.54468	1.89497e-13	Q8T112	Cerebrin prohormone	Aplysia californica
JU065012	256	119	121	132	89	336	73	35	0.545863	0	0.545863	1.86444e-09	Q62655	Transcription factor 4	Rattus norvegicus
JU063958	0	119	267	0	0	134	265	35	0.391886	0	0.391886	5.1906e-20	P42578	Yolk ferritin	Lymnaea stagnalis
JU071732	0	59	340	528	44	0	29	35	0.413165	1	1.41316
JU065336	102	89	121	363	89	67	117	34	0.518861	3	3.51886	4.9309e-49	Q803J8	Zinc finger CCCH domain-containing protein 15.	Danio rerio
JU071603	179	0	145	297	44	0	162	34	0.443312	0	0.443312	2.99836e-12	P51970	NADH dehydrogenase [ubiquinone] 1 alpha subcomplex subunit 8	Homo sapiens
JU064895	51	89	72	66	133	605	176	34	0.517479	3	3.51748	1.14499e-06	Q5RCM9	Cyclic AMP-responsive element-binding protein 3-like protein 2	Pongo abelii
JU062921	0	89	243	561	0	0	58	34	0.393503	1	1.3935
JU069578	411	269	48	132	133	0	0	34	0.433806	0	0.433806
JU063424	488	0	121	99	0	0	103	34	0.391892	3	3.39189	8.52846e-07	O14095	Thioredoxin domain-containing protein C2F3.12c.	Schizosaccharomyces pombe 972h-
JU062713	0	89	194	66	311	67	191	34	0.472359	0	0.472359	9.91755e-11	P11833	Tubulin beta chain	Paracentrotus lividus
JU064571	0	29	97	33	133	875	176	34	0.457199	3	3.4572	1.10182e-86	ABY87432	unknown protein 38, partial [Haliotis diversicolor].	Haliotis diversicolor
scaffold623	102	149	145	66	178	0	191	34	0.489477	0	0.489477	3.95604e-87	Q9V6L0	Probable lysine-specific demethylase 4B	Drosophila melanogaster
JU063791	102	59	145	297	133	0	147	34	0.491355	0	0.491355	2.9885e-12	P24367	Peptidyl-prolyl cis-trans isomerase B	Gallus gallus
JU065200	0	149	48	99	846	0	73	34	0.427751	3	3.42775	2.01774e-48	Q6PDG5	SWI/SNF complex subunit SMARCC2	Mus musculus
JU071664	462	209	48	132	44	67	14	34	0.475068	1	1.47507	6.65085e-12	Q9VHN6	39S ribosomal protein L19, mitochondrial	Drosophila melanogaster
JU070839	128	119	48	132	356	67	147	34	0.522887	2	2.52289
JU066550	0	0	0	0	0	0	500	34	0.208244	3	3.20824
JU069588	0	0	0	0	0	0	500	34	0.208244	3	3.20824
JU071589	0	0	48	33	0	67	441	34	0.31754	3	3.31754	8.07625e-72	P22464	Annexin-B9	Drosophila melanogaster
JU066293	0	0	826	0	0	0	0	34	0.208243	3	3.20824
JU068607	77	209	48	66	178	202	191	34	0.519413	2	2.51941
JU065549	51	239	121	99	178	403	88	34	0.539614	0	0.539614	2.02036e-40	Q8TC29	Enkurin.	Homo sapiens
JU068568	0	29	0	33	44	0	456	34	0.305981	3	3.30598
JU066022	25	359	170	165	0	202	88	34	0.483104	0	0.483104	4.94861e-90	Q9PTW9	Proteasome subunit alpha type-7	Carassius auratus
JU067419	0	329	48	66	133	134	206	34	0.465441	0	0.465441
JU065118	25	179	145	132	178	202	147	34	0.528312	2	2.52831	1.92331e-06	Q6GL89	Eukaryotic translation initiation factor 2 subunit 1	Xenopus (Silurana) tropicalis
JU065085	539	29	194	66	0	0	29	34	0.401355	2	2.40135	5.09901e-12	Q6DD32	RING finger protein 121.	Xenopus laevis
JU071616	0	209	72	33	222	538	147	34	0.485853	2	2.48585	3.42774e-11	Q00971	Neutral protease	Vibrio proteolyticus
JU065830	154	119	145	231	267	0	58	33	0.499839	0	0.499839	1.41633e-25	Q9CQ71	Replication protein A 14 kDa subunit	Mus musculus
JU063116	154	119	145	66	133	67	162	33	0.512956	1	1.51296	3.91867e-20	A5A6I3	Eukaryotic translation initiation factor 3 subunit F	Pan troglodytes
JU066121	128	299	97	264	44	0	73	33	0.480848	0	0.480848	5.05949e-15	Q9VFJ2	39S ribosomal protein L11, mitochondrial	Drosophila melanogaster
JU065844	51	149	97	198	133	134	162	33	0.520107	0	0.520107	2.7133e-20	Q9CXZ1	NADH dehydrogenase [ubiquinone] iron-sulfur protein 4, mitochondrial	Mus musculus
JU071583	0	89	243	66	133	134	191	33	0.46645	0	0.46645	5.31362e-33	O73817	Proteasome subunit beta type-3	Oncorhynchus mykiss
JU063813	0	209	121	66	0	538	162	33	0.44433	2	2.44433	8.67616e-28	P24733	Myosin heavy chain, striated muscle.	Argopecten irradians
JU069081	0	329	145	66	133	202	117	33	0.481183	0	0.481183
JU063618	205	0	72	132	133	269	162	33	0.486046	0	0.486046	4.05364e-108	P04975	Clathrin light chain B	Bos taurus
JU071342	77	59	121	33	44	0	309	33	0.427329	2	2.42733
JU066729	25	119	48	0	44	202	323	33	0.422767	0	0.422767
JU063265	102	89	48	165	44	0	265	33	0.450919	0	0.450919
JU070769	154	149	0	165	178	67	176	33	0.478055	0	0.478055
JU063333	0	89	291	99	490	0	58	33	0.437318	0	0.437318	6.95067e-11	C7G0B5	PIF	Pinctada fucata
JU065639	179	149	97	297	311	67	0	33	0.483118	0	0.483118	2.41261e-09	Q91YK2	Ribosomal RNA processing protein 1 homolog B	Mus musculus
JU065932	0	149	97	33	89	202	265	33	0.450882	0	0.450882	1.8261e-17	Q9HC38	Glyoxalase domain-containing protein 4.	Homo sapiens
JU063170	0	29	0	0	44	0	456	33	0.270271	3	3.27027	8.99713e-12	A8XCP3	Superoxide dismutase [Cu-Zn]	Caenorhabditis briggsae
JU063348	0	119	72	132	178	269	206	33	0.481186	0	0.481186
JU064284	0	59	48	0	89	67	382	33	0.369314	3	3.36931	6.64003e-28	Q03168	Lysosomal aspartic protease	Aedes aegypti
scaffold500	77	59	315	33	44	202	147	33	0.487346	0	0.487346	8.4952e-56	Q8WXX0	Dynein heavy chain 7, axonemal	Homo sapiens
JU064862	179	59	24	99	178	202	191	33	0.504588	0	0.504588	4.69226e-17	Q5R439	Vigilin	Pongo abelii
JU063327	25	269	145	231	133	202	44	32	0.510462	0	0.510462	8.26897e-10	XP_001581660	Kelch motif family protein [Trichomonas vaginalis G3].	Trichomonas vaginalis
JU069108	51	89	48	33	133	134	279	32	0.466659	2	2.46666
JU063804	0	119	194	165	44	471	103	32	0.477038	2	2.47704	2.85101e-10	P24733	Myosin heavy chain, striated muscle.	Argopecten irradians
JU070001	0	89	145	165	267	67	162	32	0.470872	0	0.470872
scaffold114	128	89	145	231	222	67	73	32	0.51915	0	0.51915	5.16104e-20	P15771	Nucleolin	Gallus gallus
JU070187	154	269	72	132	222	134	44	32	0.520163	0	0.520163
JU062791	0	119	145	99	89	134	220	32	0.460109	0	0.460109	3.2344e-42	Q5T200	Zinc finger CCCH domain-containing protein 13.	Homo sapiens
JU063859	25	0	0	33	44	67	412	32	0.331855	3	3.33186	3.1256e-25	P29330	Adrenodoxin	Ovis aries
JU065128	0	89	48	66	0	336	294	32	0.402467	2	2.40247	8.76473e-20	Q6GPW4	Transmembrane protein 205.	Xenopus laevis
JU063033	0	89	243	561	89	0	0	32	0.372573	1	1.37257
JU062809	0	29	24	33	44	538	294	32	0.403599	0	0.403599	3.42193e-11	Q6MG82	Proline-rich transmembrane protein 1.	Rattus norvegicus
JU064998	0	89	97	330	44	269	147	32	0.466331	0	0.466331	1.52176e-32	Q61581	Insulin-like growth factor-binding protein 7	Mus musculus
JU067186	770	0	24	0	0	0	14	32	0.267024	3	3.26702
JU069610	77	119	194	231	89	134	88	32	0.517288	0	0.517288
JU064131	231	89	121	363	44	134	14	32	0.489243	0	0.489243	1.69587e-10	P62316	Small nuclear ribonucleoprotein Sm D2	Homo sapiens
JU066015	77	59	48	627	44	67	58	32	0.46141	3	3.46141	7.89158e-08	Q9P0U1	Mitochondrial import receptor subunit TOM7 homolog	Homo sapiens
JU064208	154	59	72	66	802	0	14	32	0.437561	3	3.43756	1.23807e-21	P84798	DNA polymerase delta subunit 3	Bos taurus
JU070921	25	89	121	198	44	134	206	32	0.484778	0	0.484778
JU065315	334	89	72	99	0	0	147	32	0.427284	1	1.42728	2.67561e-08	Q7ZTZ2	Probable ribosome biogenesis protein RLP24	Danio rerio
JU066554	0	29	0	0	0	0	456	32	0.234541	3	3.23454	2.58139e-07	ZP_07959277	TP901 family Tail tape measure protein [Lachnospiraceae bacterium 8_1_57FAA].	Lachnospiraceae bacterium
JU071565	282	59	97	99	44	67	147	32	0.486587	1	1.48659	1.89071e-14	A4QNF3	Reactive oxygen species modulator 1	Xenopus (Silurana) tropicalis
JU071756	25	0	364	132	89	0	147	32	0.408879	2	2.40888	1.63101e-38	P13709	Homeotic protein female sterile	Drosophila melanogaster
scaffold40	51	239	97	264	133	134	58	31	0.507789	0	0.507789	3.3305e-06	B2RY56	Segment polarity protein dishevelled homolog DVL-3	Xenopus (Silurana) tropicalis
JU064309	51	89	218	198	133	269	58	31	0.511735	0	0.511735	5.56881e-06	Q06AT9	RNA-binding protein 4B	Sus scrofa
scaffold533	0	149	170	33	44	67	235	31	0.424369	0	0.424369	2.27194e-07	Q96M91	Coiled-coil domain-containing protein 11.	Homo sapiens
JU062687	0	0	0	0	133	0	412	31	0.250851	2	2.25085
JU071708	0	359	194	330	44	0	0	31	0.373409	0	0.373409
scaffold520	334	149	48	165	133	0	44	31	0.462735	0	0.462735	2.49072e-108	Q8N1V2	WD repeat-containing protein 16	Homo sapiens
JU067143	25	389	72	264	89	202	14	31	0.475433	0	0.475433
JU064227	0	0	0	99	0	0	412	31	0.25084	3	3.25084	5.21156e-28	P91253	Probable glutathione S-transferase 7	Caenorhabditis elegans
JU070233	0	149	97	429	133	134	58	31	0.463856	2	2.46386
JU065905	102	59	121	462	89	0	58	31	0.45736	3	3.45736	4.51668e-08	Q9ESX4	Nucleolar protein of 40 kDa	Mus musculus
JU063146	77	89	315	231	133	67	14	31	0.480259	0	0.480259	5.44155e-58	A7MBH5	Coiled-coil domain-containing protein 151.	Bos taurus
scaffold583	0	59	0	0	89	202	353	31	0.337824	0	0.337824	7.12289e-19	Q9IBG7	Kielin/chordin-like protein	Xenopus laevis
JU064423	0	0	0	66	0	0	427	31	0.24283	3	3.24283	2.07459e-21	Q16651	Prostasin	Homo sapiens
scaffold21	0	239	72	132	44	67	206	31	0.439365	0	0.439365	3.92847e-66	A7MBF6	Uncharacterized protein C1orf228 homolog.	Bos taurus
JU062826	51	149	97	363	44	134	88	31	0.493952	2	2.49395	1.08156e-09	Q8K3E5	Jouberin	Mus musculus
JU062683	0	179	291	231	222	67	0	31	0.421252	0	0.421252
JU063588	154	0	170	165	89	67	147	31	0.460977	0	0.460977	3.43005e-16	P00430	Cytochrome c oxidase subunit 7C, mitochondrial	Bos taurus
JU064306	102	59	194	99	178	67	132	31	0.499071	0	0.499071	1.52074e-19	Q06A37	Chromodomain-helicase-DNA-binding protein 7	Gallus gallus
JU065913	0	59	121	33	222	67	250	31	0.428885	0	0.428885	8.43782e-07	Q9GMB0	Dolichyl-diphosphooligosaccharide--protein glycosyltransferase subunit 1	Sus scrofa
JU062718	0	59	680	0	0	0	14	31	0.275162	3	3.27516	4.75361e-34	P20740	Ovostatin	Gallus gallus
contig3904	0	478	72	165	44	336	14	31	0.435841	0	0.435841
JU067596	0	89	24	132	846	134	29	31	0.425653	3	3.42565
JU066105	154	179	194	198	89	67	29	31	0.500145	0	0.500145	2.18878e-10	Q9V461	DNA replication licensing factor Mcm6	Drosophila melanogaster
JU065643	0	0	0	0	0	0	456	31	0.198839	3	3.19884	4.79599e-10	Q91ZW8	CD209 antigen-like protein D	Mus musculus
JU066772	0	0	0	0	0	0	456	31	0.198839	3	3.19884
JU069952	0	0	0	0	0	0	456	31	0.198839	3	3.19884
JU062806	25	209	72	33	133	134	206	31	0.473757	0	0.473757	1.75495e-07	Q6GR66	Mitochondrial import inner membrane translocase subunit Tim9 B	Xenopus laevis
JU064580	0	149	267	33	401	202	29	31	0.453488	0	0.453488	1.14978e-137	Q2T9W3	IQ domain-containing protein G.	Bos taurus
JU067174	436	59	72	165	89	0	29	31	0.440434	2	2.44043
JU063769	77	0	291	165	267	202	29	31	0.465243	0	0.465243	1.84461e-07	P21910	Lamin-L(II)	Xenopus laevis
JU065024	334	59	97	66	178	0	88	31	0.460079	0	0.460079	9.00508e-12	Q641S4	Selenoprotein K	Xenopus laevis
JU071611	128	119	97	99	133	0	162	30	0.464921	2	2.46492	1.16559e-40	P79896	Alcohol dehydrogenase class-3	Sparus aurata
JU071652	128	389	97	66	89	67	44	30	0.478674	3	3.47867	3.72137e-10	Q94A52	DEAD-box ATP-dependent RNA helicase 2.	Arabidopsis thaliana
JU065223	0	0	72	693	133	0	44	30	0.349274	3	3.34927	4.09975e-25	Q6UX04	Peptidyl-prolyl cis-trans isomerase CWC27 homolog	Homo sapiens
JU065859	77	0	97	33	89	67	279	30	0.41091	2	2.41091	2.3508e-16	Q9D1L9	Hepatitis B virus X-interacting protein homolog	Mus musculus
JU067645	154	179	24	330	89	134	44	30	0.486511	0	0.486511
JU066133	231	119	97	165	44	0	103	30	0.460093	0	0.460093	1.35233e-34	Q9VTJ8	Mitochondrial import inner membrane translocase subunit TIM14.	Drosophila melanogaster
contig8651	642	89	0	33	44	0	0	30	0.311885	3	3.31189
JU062761	0	179	0	66	133	0	279	30	0.355529	0	0.355529	3.07227e-51	Q0MQI8	NADH dehydrogenase [ubiquinone] flavoprotein 2, mitochondrial	Gorilla gorilla
JU063035	0	29	170	231	311	0	117	30	0.420208	0	0.420208
JU068623	0	0	24	0	0	67	412	30	0.260413	3	3.26041
JU071417	0	359	145	297	133	0	0	30	0.380213	0	0.380213
JU066003	462	29	121	198	0	0	0	30	0.354572	2	2.35457	4.43713e-11	Q9NXE8	Pre-mRNA-splicing factor CWC25 homolog	Homo sapiens
JU063738	0	149	194	66	222	134	117	30	0.462761	0	0.462761	1.16079e-43	P18258	Tubulin alpha-1 chain.	Paracentrotus lividus
JU068084	0	209	72	132	89	471	103	30	0.467267	1	1.46727
JU065703	0	89	121	132	44	202	206	30	0.444371	0	0.444371	2.58246e-11	Q95V84	60S ribosomal protein L38.	Branchiostoma belcheri
JU071719	0	149	170	33	267	134	132	30	0.455191	0	0.455191
scaffold75	25	149	145	66	89	67	191	30	0.468546	0	0.468546	2.25688e-68	O75534	Cold shock domain-containing protein E1	Homo sapiens
JU068015	0	0	0	0	0	0	441	30	0.19561	3	3.19561
JU068488	0	0	0	0	0	0	441	30	0.19561	3	3.19561
JU062777	0	209	170	33	44	0	206	30	0.394041	2	2.39404	1.80273e-12	Q4J781	NAD-dependent alcohol dehydrogenase.	Sulfolobus acidocaldarius DSM 639
scaffold41	0	269	388	33	89	134	0	30	0.386709	0	0.386709	5.75295e-11	BAB92088	tauropine dehydrogenase [Haliotis discus hannai].	Haliotis discus
JU066264	0	29	145	33	0	538	206	30	0.393536	2	2.39354	1.13962e-32	XP_001640293	predicted protein, partial [Nematostella vectensis].	Nematostella vectensis
JU065858	256	179	48	99	0	0	132	30	0.419913	0	0.419913	9.2218e-17	Q9D1L0	Coiled-coil-helix-coiled-coil-helix domain-containing protein 2, mitochondrial	Mus musculus
JU062906	77	59	340	33	89	202	73	30	0.473906	0	0.473906
JU071267	0	149	97	99	311	67	147	30	0.456264	1	1.45626
JU062684	0	149	145	264	44	336	58	29	0.455389	0	0.455389	1.91004e-06	CCA17085	conserved hypothetical protein [Albugo laibachii Nc14].	Albugo laibachii
JU064687	0	179	145	264	178	134	44	29	0.459786	0	0.459786	3.66006e-10	Q3ZC22	Heat shock factor-binding protein 1.	Bos taurus
contig8701	719	0	0	33	0	0	0	29	0.224696	3	3.2247
JU063436	77	59	121	165	89	67	162	29	0.47675	0	0.47675	4.61042e-77	O15145	Actin-related protein 2/3 complex subunit 3	Homo sapiens
JU068574	25	0	631	33	0	67	0	29	0.289248	3	3.28925
JU069570	0	209	194	66	133	67	117	29	0.444598	0	0.444598
JU066189	0	0	0	0	0	0	427	29	0.192328	3	3.19233	4.13976e-115	Q9YGM8	Caveolin-1.	Takifugu rubripes
JU068554	51	209	170	165	133	67	58	29	0.48835	0	0.48835
JU071462	0	59	97	99	133	67	235	29	0.42421	0	0.42421
JU063692	0	0	170	33	133	875	73	29	0.400688	3	3.40069	2.45685e-09	P12110	Collagen alpha-2(VI) chain	Homo sapiens
JU070555	0	89	121	99	133	67	206	29	0.434781	0	0.434781
JU062839	77	29	145	165	222	0	132	29	0.451906	0	0.451906	7.37517e-06	Q90623	Protein phosphatase 1 regulatory subunit 12A	Gallus gallus
JU064776	0	209	145	198	222	67	58	29	0.456441	0	0.456441	1.36387e-07	Q568D2	Uncharacterized protein C15orf26 homolog.	Danio rerio
JU065175	256	179	97	33	0	202	73	29	0.449268	0	0.449268	1.28173e-18	Q6P4Z5	14-3-3 protein zeta.	Xenopus (Silurana) tropicalis
JU063937	0	0	24	0	89	0	382	29	0.268321	3	3.26832	1.5787e-155	P41041	Calmodulin	Pneumocystis carinii
JU071640	0	89	194	132	534	0	29	29	0.408498	2	2.4085	3.15068e-25	Q6NUW5	Acidic leucine-rich nuclear phosphoprotein 32 family member E.	Danio rerio
JU064364	308	179	145	33	89	67	14	29	0.456289	0	0.456289	1.77999e-20	Q0VF49	Uncharacterized protein KIAA2012.	Homo sapiens
JU065836	0	59	48	66	89	0	309	29	0.365668	3	3.36567	3.4775e-24	Q9CQZ6	NADH dehydrogenase [ubiquinone] 1 beta subcomplex subunit 3	Mus musculus
JU064816	231	29	72	198	89	0	117	29	0.443696	0	0.443696	2.71679e-13	Q5EA75	Ethanolamine-phosphate cytidylyltransferase	Bos taurus
JU064240	205	59	48	198	178	0	103	29	0.455407	0	0.455407	1.02698e-07	P97615	Thioredoxin, mitochondrial	Rattus norvegicus
JU065960	0	29	0	0	89	0	382	29	0.268306	3	3.26831	1.03838e-53	Q9LQU4	Protein PLANT CADMIUM RESISTANCE 2	Arabidopsis thaliana
JU066472	0	179	24	264	178	0	147	29	0.40856	0	0.40856	0	XP_002739203	PREDICTED: hypothetical protein [Saccoglossus kowalevskii].	Saccoglossus kowalevskii
scaffold524	25	59	267	165	44	67	117	29	0.456957	0	0.456957	2.5619e-11	Q969V4	Tektin-1.	Homo sapiens
JU066041	0	59	243	132	89	67	147	29	0.433992	0	0.433992	7.64154e-16	Q9R0P6	Signal peptidase complex catalytic subunit SEC11A	Mus musculus
JU064732	51	29	340	132	311	0	14	29	0.421434	1	1.42143	7.73752e-32	Q4R779	Nucleolar protein 58	Macaca fascicularis
JU063032	205	59	72	198	178	0	88	29	0.459714	0	0.459714
JU071727	0	89	243	264	0	269	44	28	0.409151	2	2.40915
JU071649	0	0	121	231	0	336	162	28	0.372687	0	0.372687	1.13753e-06	Q8TFG9	Putative GPI-anchored protein PB15E9.01c	Schizosaccharomyces pombe 972h-
JU069807	0	239	218	264	89	67	0	28	0.395409	0	0.395409
JU064474	25	0	48	66	133	67	279	28	0.389991	1	1.38999	1.71807e-23	Q24407	ATP synthase-coupling factor 6, mitochondrial	Drosophila melanogaster
JU066849	0	149	194	66	44	0	176	28	0.390838	0	0.390838
scaffold460	25	89	121	198	89	538	44	28	0.478326	2	2.47833	2.51152e-06	Q8CDK3	IQ and ubiquitin-like domain-containing protein.	Mus musculus
JU070983	77	89	121	561	0	0	0	28	0.350859	3	3.35086
JU070195	308	59	243	33	0	0	44	28	0.384747	2	2.38475
JU063646	0	0	0	0	0	0	412	28	0.188988	3	3.18899	5.91378e-40	P08861	Chymotrypsin-like elastase family member 3B	Homo sapiens
JU063270	0	0	0	0	0	0	412	28	0.188988	3	3.18899
JU070334	0	0	0	0	0	0	412	28	0.188988	3	3.18899
JU071117	0	0	0	0	0	0	412	28	0.188988	3	3.18899
JU063115	0	0	680	0	0	0	0	28	0.188986	3	3.18899	1.85705e-09	A4QP81	Putative ferric-chelate reductase 1.	Danio rerio
JU069377	0	0	72	264	0	0	250	28	0.310139	2	2.31014
JU069841	77	119	48	132	89	67	176	28	0.465167	0	0.465167
JU066398	102	59	48	198	89	67	162	28	0.464587	0	0.464587	1.11554e-22	XP_002610643	hypothetical protein BRAFLDRAFT_260539 [Branchiostoma floridae].	Branchiostoma floridae
JU070642	0	179	97	0	222	605	58	28	0.417342	2	2.41734
JU064274	359	29	218	33	44	0	29	28	0.398395	0	0.398395	1.34115e-36	Q02427	RNA-binding protein 1.	Drosophila melanogaster
JU064981	411	119	24	33	133	67	29	28	0.433762	3	3.43376	6.02041e-13	Q5ZM33	Heterochromatin protein 1-binding protein 3.	Gallus gallus
scaffold93	205	89	48	132	44	538	29	28	0.472023	2	2.47202	3.60123e-21	XP_002939561	PREDICTED: thyroglobulin-like [Xenopus (Silurana) tropicalis].	Xenopus (Silurana) tropicalis
JU065174	231	149	24	99	178	67	73	28	0.471542	0	0.471542	1.8743e-06	Q6P3K7	Casein kinase I isoform delta-B	Danio rerio
JU069345	205	149	48	165	89	67	73	28	0.477287	0	0.477287
JU064644	488	59	72	0	89	0	29	28	0.368992	3	3.36899	4.42369e-11	Q3T078	Uncharacterized protein C16orf48 homolog.	Bos taurus
JU062926	25	89	72	0	0	67	279	27	0.350852	3	3.35085
scaffold401	154	59	97	231	222	0	44	27	0.44566	0	0.44566	1.09601e-17	Q6TFL3	Uncharacterized protein C9orf93.	Homo sapiens
scaffold374	102	149	170	165	133	0	44	27	0.449392	0	0.449392	1.55903e-08	Q6DGP2	Pre-mRNA-splicing factor syf2.	Danio rerio
JU067318	102	269	48	66	89	67	103	27	0.460316	3	3.46032
JU066053	0	0	48	0	44	0	353	27	0.261211	3	3.26121	6.65951e-12	Q9TTC6	Peptidyl-prolyl cis-trans isomerase A	Oryctolagus cuniculus
JU065735	0	89	121	198	222	67	103	27	0.439283	0	0.439283	8.63336e-07	Q96LR7	Uncharacterized protein C2orf50.	Homo sapiens
JU064570	0	149	0	297	222	336	44	27	0.408601	0	0.408601	1.43166e-14	Q2LK54	UPF0608 protein C19orf42 homolog	Siniperca chuatsi
JU069020	385	59	72	99	44	0	44	27	0.410141	3	3.41014
JU068234	0	119	97	0	44	403	176	27	0.389797	1	1.3898
scaffold352	154	149	97	132	133	67	58	27	0.479212	0	0.479212	1.03893e-09	Q62448	Eukaryotic translation initiation factor 4 gamma 2	Mus musculus
scaffold178	436	119	72	33	44	0	14	27	0.387685	3	3.38769	8.40895e-14	P78312	Protein FAM193A	Homo sapiens
JU069597	179	119	170	231	44	0	14	27	0.426331	0	0.426331
JU063810	0	179	121	33	267	67	117	27	0.427268	0	0.427268	1.11631e-06	P24733	Myosin heavy chain, striated muscle.	Argopecten irradians
JU063242	0	0	656	0	0	0	0	27	0.18558	3	3.18558	1.77383e-20	ABY87349	profilin [Haliotis diversicolor].	Haliotis diversicolor
JU070576	0	0	656	0	0	0	0	27	0.18558	3	3.18558
JU065076	25	149	24	198	89	67	162	27	0.443442	0	0.443442	4.49783e-16	Q6BWA5	Inorganic pyrophosphatase	Debaryomyces hansenii
JU071255	77	239	48	66	222	134	73	27	0.474112	0	0.474112
JU065888	0	119	24	66	44	134	250	27	0.391133	0	0.391133	3.68365e-10	Q9DB77	Cytochrome b-c1 complex subunit 2, mitochondrial	Mus musculus
JU065707	102	59	121	231	133	0	88	27	0.445621	0	0.445621	3.6361e-36	Q962X9	Protein BUD31 homolog	Branchiostoma belcheri
JU068007	0	179	97	0	178	67	176	27	0.389761	0	0.389761
JU063640	0	0	0	0	44	0	382	27	0.217831	3	3.21783	2.17921e-26	P08472	Mesenchyme-specific cell surface glycoprotein	Strongylocentrotus purpuratus
JU064310	51	119	194	132	267	67	29	27	0.468057	0	0.468057	3.20076e-06	Q06AT9	RNA-binding protein 4B	Sus scrofa
JU065510	642	59	0	0	0	0	0	27	0.229063	3	3.22906	2.28702e-52	Q8NA47	Coiled-coil domain-containing protein 63.	Homo sapiens
JU069879	0	89	24	462	44	134	88	27	0.404908	3	3.40491
JU066439	0	89	267	33	267	67	73	27	0.419066	2	2.41907	4.11524e-44	XP_002733699	PREDICTED: Kinesin-Like Protein family member (klp-6)-like [Saccoglossus kowalevskii].	Saccoglossus kowalevskii
JU067119	51	149	72	0	311	0	147	27	0.39965	1	1.39965
JU064774	205	209	121	132	133	0	0	27	0.40864	2	2.40864	8.58327e-07	Q566Y8	Protein mago nashi homolog.	Danio rerio
JU062849	411	119	24	99	0	67	29	27	0.398041	3	3.39804	1.13879e-105	Q9BS18	Anaphase-promoting complex subunit 13	Homo sapiens
JU071164	0	209	24	66	222	202	132	27	0.429559	0	0.429559
JU065144	0	0	0	33	0	538	265	27	0.288238	1	1.28824	7.28268e-30	Q6MZM0	Hephaestin-like protein 1	Homo sapiens
JU064202	0	59	0	0	89	673	191	27	0.342691	3	3.34269	1.44982e-14	P83298	Fibrinolytic enzyme, isozyme C	Lumbricus rubellus
JU065317	51	59	291	198	0	0	73	27	0.392035	0	0.392035	2.57175e-19	Q7ZUG0	Small nuclear ribonucleoprotein E	Danio rerio
JU071713	0	89	97	231	44	269	103	26	0.429472	0	0.429472
JU071578	128	418	97	33	44	0	14	26	0.392068	3	3.39207	5.211e-12	O35344	Importin subunit alpha-3	Mus musculus
JU064417	0	29	97	0	44	0	294	26	0.302592	2	2.30259	2.19785e-18	Q15582	Transforming growth factor-beta-induced protein ig-h3	Homo sapiens
JU071414	308	89	121	99	44	134	0	26	0.413537	1	1.41354
JU064761	0	29	534	0	0	0	44	26	0.265096	3	3.2651	2.76443e-37	Q53Q31	Putative serpin-Z6A	Oryza sativa Japonica Group
JU071724	436	0	170	33	0	0	14	26	0.313156	2	2.31316
JU063884	0	0	0	0	44	0	368	26	0.214301	3	3.2143	5.23136e-28	XP_002109790	hypothetical protein TRIADDRAFT_53030 [Trichoplax adhaerens].	Trichoplax adhaerens
JU066657	0	0	0	0	44	0	368	26	0.214301	3	3.2143
JU071641	51	59	121	33	222	202	117	26	0.459323	0	0.459323	4.63342e-08	Q6P859	G patch domain-containing protein 4.	Xenopus (Silurana) tropicalis
JU070246	0	89	145	198	89	336	58	26	0.438623	0	0.438623
JU064542	77	119	97	330	133	0	29	26	0.430011	2	2.43001	7.40888e-19	Q2HJ97	Prohibitin-2.	Bos taurus
JU067572	25	389	72	132	178	67	0	26	0.404909	1	1.40491
JU062848	0	149	97	132	222	538	0	26	0.403588	2	2.40359	1.59355e-62	Q99MQ5	Collagen alpha-1(XXV) chain	Mus musculus
JU062803	0	179	24	66	133	403	117	26	0.424054	1	1.42405	2.59429e-19	Q6DFT4	Tumor suppressor candidate 5 homolog.	Xenopus (Silurana) tropicalis
JU071113	0	89	0	0	0	67	323	26	0.265088	3	3.26509
scaffold90	154	119	24	132	222	269	29	26	0.467821	0	0.467821	3.54613e-121	O97159	Chromodomain-helicase-DNA-binding protein Mi-2 homolog	Drosophila melanogaster
JU068724	0	0	0	0	0	0	382	26	0.182102	3	3.1821
JU067225	539	29	48	66	0	0	0	26	0.300376	3	3.30038
JU065079	25	59	72	66	0	67	250	26	0.381536	3	3.38154	1.36261e-12	Q6CGG3	FK506-binding protein 2	Yarrowia lipolytica
JU071290	102	179	145	99	178	134	14	26	0.465862	1	1.46586
JU062845	205	119	170	66	44	134	29	26	0.454138	0	0.454138	3.20208e-22	Q96KR1	Zinc finger RNA-binding protein	Homo sapiens
JU067644	0	209	0	0	267	202	147	26	0.356755	1	1.35675
JU062937	0	179	72	132	445	134	14	26	0.419882	2	2.41988
JU071227	256	179	72	66	133	0	29	26	0.425108	0	0.425108
JU069311	0	59	340	33	133	0	88	26	0.369147	2	2.36915
JU070750	0	0	194	264	44	0	117	25	0.338796	0	0.338796
JU064160	0	149	24	66	44	67	220	25	0.37585	0	0.37585	8.59972e-08	P74897	Universal stress protein in QAH/OAS sulfhydrylase 3'region	Thermus aquaticus
JU063820	411	89	72	99	0	0	0	25	0.328452	3	3.32845
JU065766	154	119	194	165	89	0	0	25	0.390307	0	0.390307	6.15964e-21	Q99871	HAUS augmin-like complex subunit 7	Homo sapiens
JU063136	0	0	24	0	0	605	220	25	0.28119	2	2.28119	2.00846e-24	A6QM00	Glutamate decarboxylase-like protein 1.	Bos taurus
JU065958	0	59	48	0	89	0	279	25	0.307192	3	3.30719	1.88581e-06	Q9LQU4	Protein PLANT CADMIUM RESISTANCE 2	Arabidopsis thaliana
JU068427	0	0	194	363	222	67	0	25	0.335044	0	0.335044
JU065042	436	29	48	33	133	67	0	25	0.366756	3	3.36676	3.62156e-13	Q66II8	U1 small nuclear ribonucleoprotein 70 kDa	Xenopus (Silurana) tropicalis
JU071744	102	119	72	0	44	202	147	25	0.415255	0	0.415255
JU063662	128	59	0	99	89	134	162	25	0.411678	0	0.411678	2.34629e-12	P0CB50	Peroxiredoxin-1.	Gallus gallus
JU064711	0	0	607	0	0	0	0	25	0.178574	3	3.17857
JU071643	0	89	24	0	0	538	191	25	0.32737	2	2.32737	3.59688e-21	Q75J93	Circularly permutated Ras protein 1	Dictyostelium discoideum
JU064799	462	119	0	0	89	0	14	25	0.309152	3	3.30915	8.14893e-66	Q5BJP2	Protein CWC15 homolog.	Rattus norvegicus
JU063428	282	89	48	33	178	0	58	25	0.409395	0	0.409395	1.54349e-11	O14602	Eukaryotic translation initiation factor 1A, Y-chromosomal	Homo sapiens
JU069945	102	149	97	132	133	0	73	25	0.435867	0	0.435867
JU065944	590	0	48	0	0	0	0	25	0.221791	3	3.22179	7.0672e-08	Q9JI13	Something about silencing protein 10	Mus musculus
JU062673	0	0	0	0	0	0	368	25	0.178571	3	3.17857	3.59244e-16	AAX11342	developmentally-regulated vdg1 [Haliotis asinina].	Haliotis asinina
JU063214	0	0	0	0	0	0	368	25	0.178571	3	3.17857	8.4922e-07	ABB76764	vdg3 [Mytilus edulis].	Mytilus edulis
JU071671	0	0	0	0	0	0	368	25	0.178571	3	3.17857
JU070081	0	29	145	231	0	403	73	25	0.385017	0	0.385017
JU065181	102	29	218	66	178	0	73	25	0.416065	0	0.416065	7.79045e-49	Q6P698	Plastin-2	Danio rerio
JU063071	51	89	218	66	89	67	88	25	0.443712	3	3.44371	9.94725e-48	A0JP43	EF-hand calcium-binding domain-containing protein 5.	Mus musculus
JU070699	0	269	48	363	44	0	29	25	0.36231	2	2.36231
JU065629	51	149	145	99	133	0	88	25	0.42904	0	0.42904	1.03761e-12	Q91W50	Cold shock domain-containing protein E1.	Mus musculus
JU063635	0	239	48	33	133	336	88	25	0.416425	0	0.416425	4.83776e-18	P08051	Myosin regulatory light chain, smooth muscle.	Pseudocardium sachalinensis
JU062694	25	59	121	66	44	0	206	25	0.385928	0	0.385928	7.43107e-11	O43674	NADH dehydrogenase [ubiquinone] 1 beta subcomplex subunit 5, mitochondrial	Homo sapiens
JU069978	77	179	48	132	178	67	73	25	0.458254	0	0.458254
JU070041	0	59	121	132	89	471	73	25	0.426621	3	3.42662
JU071746	25	119	145	198	222	67	29	25	0.448149	0	0.448149
JU062970	0	329	48	132	311	0	14	25	0.370553	1	1.37055
JU067654	102	179	121	165	89	67	29	25	0.45531	0	0.45531
JU068457	0	209	121	132	178	269	14	25	0.424303	0	0.424303
JU066684	0	59	48	99	133	336	147	25	0.417497	1	1.4175
JU066565	0	29	48	165	89	336	147	25	0.409345	1	1.40935
JU064786	282	89	170	0	0	0	44	24	0.336701	0	0.336701
JU064327	436	89	24	66	44	0	0	24	0.331083	3	3.33108	5.42402e-09	Q08EJ0	PLAC8-like protein 1.	Mus musculus
JU069567	0	209	194	66	44	202	44	24	0.40548	2	2.40548
JU071073	0	89	194	396	0	67	0	24	0.322324	1	1.32232
JU064304	25	179	48	33	44	134	162	24	0.414111	1	1.41411	8.09962e-26	NP_001191630	ApCREB2 protein [Aplysia californica].	Aplysia californica
JU068277	0	29	24	0	44	403	220	24	0.332959	0	0.332959
JU064330	0	59	72	33	133	269	162	24	0.39982	0	0.39982	1.263e-13	Q09139	Fatty acid-binding protein, brain	Bos taurus
JU063198	51	209	121	132	133	0	44	24	0.420027	0	0.420027	2.28998e-15	AAW84264	heterogeneous nuclear ribonucleoprotein L, partial [Aplysia californica].	Aplysia californica
JU064184	0	0	0	0	0	0	353	24	0.174969	3	3.17497	4.54389e-149	P82198	Transforming growth factor-beta-induced protein ig-h3	Mus musculus
JU066548	0	0	0	0	0	0	353	24	0.174969	3	3.17497
JU063047	0	0	218	429	89	0	0	24	0.286424	0	0.286424
JU068690	411	179	48	0	0	0	0	24	0.280853	1	1.28085
JU068144	102	149	48	132	222	0	58	24	0.424522	0	0.424522
JU066103	0	89	364	0	133	202	0	24	0.323913	0	0.323913	3.0958e-17	Q9V3Y3	Defense protein l(2)34Fc	Drosophila melanogaster
JU063586	205	119	170	132	44	0	0	24	0.374092	0	0.374092	4.62761e-16	P00377	Dihydrofolate reductase.	Sus scrofa
JU064430	0	59	121	99	178	202	103	24	0.419997	0	0.419997	6.54951e-15	Q16956	78 kDa glucose-regulated protein	Aplysia californica
JU067221	0	119	97	231	89	134	73	24	0.418218	0	0.418218
JU068096	616	0	0	0	0	0	0	24	0.174963	3	3.17496
JU064731	0	389	145	66	44	0	29	24	0.352965	2	2.35297	3.50299e-08	Q4R779	Nucleolar protein 58	Macaca fascicularis
JU063885	0	29	48	165	0	0	235	24	0.308927	0	0.308927	6.44161e-23	P32232	Cystathionine beta-synthase	Rattus norvegicus
JU066694	0	209	194	0	178	67	58	24	0.374065	1	1.37407
JU063477	282	89	24	198	89	67	0	24	0.38972	0	0.38972	1.68339e-18	O43663	Protein regulator of cytokinesis 1.	Homo sapiens
JU069411	0	59	72	0	401	67	132	24	0.362349	2	2.36235
JU063750	128	29	145	165	0	134	73	24	0.413262	0	0.413262	1.33707e-07	P20020	Plasma membrane calcium-transporting ATPase 1	Homo sapiens
JU068843	0	29	0	132	222	403	117	24	0.375475	0	0.375475
JU064629	102	0	24	165	178	67	132	24	0.401271	0	0.401271	1.79248e-20	Q3SX11	Ribosome biogenesis protein NSA2 homolog	Bos taurus
scaffold395	256	89	48	99	178	67	14	24	0.429984	0	0.429984	3.23737e-06	Q6PFK1	Zinc finger protein 598.	Danio rerio
scaffold653	25	149	170	165	133	67	29	24	0.437967	0	0.437967	1.54841e-83	Q9Z277	Tyrosine-protein kinase BAZ1B	Mus musculus
JU065852	565	29	0	0	0	0	14	24	0.2389	3	3.2389	9.58156e-19	Q9D0K2	Succinyl-CoA:3-ketoacid-coenzyme A transferase 1, mitochondrial	Mus musculus
JU064548	179	89	48	99	0	202	88	24	0.418039	0	0.418039	1.63828e-50	Q2KI14	NADH dehydrogenase [ubiquinone] 1 alpha subcomplex assembly factor 3.	Bos taurus
JU071237	0	59	24	0	44	403	206	24	0.343033	0	0.343033
JU066576	0	119	24	33	89	673	88	24	0.393757	3	3.39376
JU066892	0	209	72	198	89	0	88	24	0.38178	1	1.38178
JU063760	51	0	121	231	267	0	44	23	0.374249	0	0.374249	1.62692e-130	P21126	Ubiquitin-like protein 4A	Mus musculus
JU064898	462	89	24	0	44	0	0	23	0.284852	3	3.28485	2.9204e-31	Q5RDA3	Cleavage stimulation factor subunit 2	Pongo abelii
JU067972	0	119	48	33	44	269	162	23	0.383279	0	0.383279
JU063904	0	0	48	33	44	538	162	23	0.34143	3	3.34143	2.07724e-16	P35003	Chymotrypsin-like serine proteinase	Haliotis rufescens
JU065087	0	0	0	0	0	0	338	23	0.171291	3	3.17129	5.27413e-09	Q6DDP3	Ectonucleotide pyrophosphatase/phosphodiesterase family member 6	Xenopus laevis
JU065135	0	0	0	0	0	0	338	23	0.171291	3	3.17129	1.94268e-06	YP_866159	unnamed protein product [Magnetococcus sp. MC-1].	Magnetococcus sp.
JU063041	0	0	0	0	0	0	338	23	0.171291	3	3.17129
JU063262	25	119	97	0	44	67	176	23	0.373749	0	0.373749	5.10719e-12	ACJ65687	glycogen synthase kinase [Haliotis discus discus].	Haliotis discus
JU064065	77	59	194	198	44	0	44	23	0.398465	2	2.39846	5.37483e-17	P54353	Putative peptidyl-prolyl cis-trans isomerase dodo	Drosophila melanogaster
JU070331	0	0	48	0	44	0	294	23	0.245966	3	3.24597
scaffold364	51	239	24	231	0	0	73	23	0.361607	2	2.36161	5.35385e-17	Q66KE9	Protein FAM161A.	Xenopus laevis
JU071739	25	389	0	33	0	0	117	23	0.301226	3	3.30123
JU066628	51	239	121	132	133	67	0	23	0.400398	0	0.400398
JU067242	0	89	170	231	44	202	29	23	0.398932	0	0.398932
JU071325	0	89	97	165	178	269	44	23	0.417885	0	0.417885
JU071553	0	0	0	0	44	134	294	23	0.245952	1	1.24595
JU071131	51	0	170	132	0	134	117	23	0.367952	0	0.367952
JU070485	0	29	194	462	0	0	0	23	0.270357	2	2.27036
JU067341	0	389	72	165	89	0	0	23	0.320994	2	2.32099
JU063418	0	89	0	33	401	336	73	23	0.364437	2	2.36444	5.42787e-09	O08999	Latent-transforming growth factor beta-binding protein 2	Mus musculus
JU071125	0	538	72	33	0	0	14	23	0.28479	3	3.28479
JU065010	334	89	24	66	133	0	14	23	0.374412	2	2.37441	6.23173e-34	Q62622	Eukaryotic translation initiation factor 4E-binding protein 1	Rattus norvegicus
JU064686	0	119	97	165	0	134	117	23	0.374237	2	2.37424	2.12665e-34	Q3ZC12	Eukaryotic translation initiation factor 3 subunit G	Bos taurus
JU062788	0	29	170	297	0	67	73	23	0.352907	0	0.352907	2.44121e-24	Q5RB63	HIV Tat-specific factor 1 homolog.	Pongo abelii
JU070352	0	29	534	0	0	0	0	23	0.203218	3	3.20322
JU066221	25	89	24	0	133	67	206	23	0.364499	0	0.364499
JU064027	0	29	170	66	222	202	73	23	0.402273	0	0.402273
JU066977	0	0	0	0	44	0	323	23	0.203237	3	3.20324
JU069389	0	478	24	198	0	0	0	23	0.266045	2	2.26604
JU063046	0	0	0	0	0	67	323	23	0.203214	3	3.20321
JU064335	25	209	24	198	178	0	58	23	0.396242	2	2.39624	6.88696e-12	Q0DAE4	Glutaredoxin-C8	Oryza sativa Japonica Group
JU068753	0	59	24	33	0	403	191	23	0.33816	1	1.33816
JU064051	0	29	48	0	0	134	265	23	0.288226	0	0.288226	2.21332e-81	P52847	Sulfotransferase family cytosolic 1B member 1	Rattus norvegicus
JU064408	0	179	170	33	89	67	88	23	0.391356	0	0.391356	3.02448e-08	Q148N0	2-oxoglutarate dehydrogenase, mitochondrial	Bos taurus
JU065838	102	209	121	165	0	0	29	23	0.376107	0	0.376107	7.23394e-24	Q9CR41	Huntingtin-interacting protein K	Mus musculus
JU070192	51	179	97	0	311	134	29	23	0.404879	0	0.404879
JU071655	128	239	24	0	0	269	58	22	0.359473	0	0.359473	6.22525e-13	Q99436	Proteasome subunit beta type-7	Homo sapiens
JU068673	128	89	97	132	44	336	0	22	0.400187	2	2.40019
JU063052	0	29	0	33	44	0	279	22	0.262829	3	3.26283
JU064864	0	59	218	0	133	67	103	22	0.34972	0	0.34972	4.62487e-08	Q5R4L0	Eukaryotic translation initiation factor 5	Pongo abelii
JU065070	0	89	24	330	222	202	0	22	0.352254	0	0.352254	3.8876e-07	Q6AYK5	Cell growth-regulating nucleolar protein.	Rattus norvegicus
JU065089	51	89	97	231	89	202	14	22	0.426373	0	0.426373	1.85308e-25	Q6DE94	Uncharacterized protein C17orf85 homolog.	Xenopus laevis
JU070595	25	89	72	66	0	67	176	22	0.369389	0	0.369389
JU070319	25	29	0	0	89	202	220	22	0.322119	1	1.32212
JU069352	231	119	24	33	133	67	44	22	0.409448	0	0.409448
JU069433	0	0	97	297	0	336	58	22	0.32987	2	2.32987
JU065899	0	29	0	0	0	134	279	22	0.241887	1	1.24189	9.22395e-09	Q9EQZ5	Prostaglandin reductase 1	Cavia porcellus
JU071676	0	0	121	0	133	134	176	22	0.315949	3	3.31595
JU069223	0	59	72	33	44	202	176	22	0.36938	1	1.36938
JU069298	0	359	97	0	44	67	58	22	0.338015	3	3.33802
JU064369	128	59	0	33	89	0	176	22	0.340297	0	0.340297	6.70762e-52	Q10305	Probable secretory pathway GDP dissociation inhibitor 1.	Schizosaccharomyces pombe 972h-
JU067984	0	0	0	0	802	0	58	22	0.222953	3	3.22295
JU071757	0	149	48	0	267	0	132	22	0.324996	0	0.324996	1.37016e-20	P48601	26S protease regulatory subunit 4	Drosophila melanogaster
JU062716	0	0	24	0	0	0	309	22	0.19938	3	3.19938
JU066922	0	0	24	0	0	0	309	22	0.19938	3	3.19938
JU064406	0	29	145	66	133	403	58	22	0.394463	2	2.39446	2.01586e-11	Q14562	ATP-dependent RNA helicase DHX8	Homo sapiens
JU071083	0	89	267	33	133	269	0	22	0.349314	0	0.349314
JU066023	25	29	145	33	222	202	73	22	0.416192	0	0.416192	1.28381e-76	Q9PU85	Serine/threonine-protein kinase pim-3	Coturnix japonica
JU063698	128	59	97	99	89	134	58	22	0.43608	0	0.43608	6.04286e-13	P12955	Xaa-Pro dipeptidase	Homo sapiens
JU071753	0	29	170	33	356	0	73	22	0.346778	1	1.34678
JU065842	308	149	24	66	89	0	0	22	0.340299	1	1.3403	2.70846e-21	Q9CWU9	Nucleoporin Nup37	Mus musculus
JU062858	385	119	0	0	44	0	29	22	0.295956	3	3.29596	1.39271e-29	Q9JLJ0	Lipopolysaccharide-induced tumor necrosis factor-alpha factor homolog	Mus musculus
JU062703	0	0	0	0	222	0	250	22	0.227109	3	3.22711	1.44575e-14	P02460	Collagen alpha-1(II) chain	Gallus gallus
JU063312	25	119	121	33	89	202	88	22	0.422555	0	0.422555	2.03021e-08	B6ZLK2	Chromodomain-helicase-DNA-binding protein 1	Gallus gallus
JU065177	256	59	97	0	89	0	58	22	0.356793	2	2.35679	6.69249e-07	Q6P5I8	Protein YIPF5	Danio rerio
JU067246	0	89	48	132	133	0	147	22	0.358591	0	0.358591
JU068197	0	329	97	99	133	0	14	22	0.349283	2	2.34928
JU069087	0	29	72	330	133	202	29	22	0.384701	0	0.384701
JU070945	0	0	0	0	0	0	323	22	0.167507	3	3.16751
JU071587	0	59	97	33	89	0	191	22	0.336903	0	0.336903	2.85516e-10	P12021	Apomucin	Sus scrofa
JU064064	205	0	218	99	0	67	14	22	0.341404	0	0.341404	3.13399e-25	P54213	Caltractin	Dunaliella salina
JU062955	0	119	170	33	89	134	88	22	0.390104	0	0.390104
JU067271	0	209	24	297	133	0	29	22	0.349678	0	0.349678
JU062854	0	59	72	33	44	67	206	22	0.353122	2	2.35312	1.44465e-06	Q9GP32	Fructose-bisphosphate aldolase.	Echinococcus multilocularis
JU067456	51	149	267	33	44	0	29	22	0.370722	0	0.370722
JU068893	0	179	0	99	445	134	14	22	0.348449	2	2.34845
scaffold154	51	59	24	33	222	67	147	22	0.400923	0	0.400923	2.94677e-07	P48643	T-complex protein 1 subunit epsilon	Homo sapiens
JU068897	231	119	24	99	89	67	29	22	0.412816	1	1.41282
JU064522	179	29	24	165	89	0	88	22	0.383712	0	0.383712	7.8797e-08	Q28X44	OCIA domain-containing protein 1.	Drosophila pseudoobscura
JU064232	102	89	0	33	89	0	162	21	0.337988	0	0.337988	2.67263e-24	P91929	NADH dehydrogenase [ubiquinone] 1 alpha subcomplex subunit 10, mitochondrial	Drosophila melanogaster
JU064964	128	0	72	33	0	67	162	21	0.331618	0	0.331618	1.22298e-08	Q5ZJB7	Charged multivesicular body protein 7	Gallus gallus
JU062874	0	119	97	231	133	202	0	21	0.361096	0	0.361096	1.73929e-15	XP_001347410	conserved Plasmodium protein [Plasmodium falciparum 3D7].	Plasmodium falciparum
JU065677	0	0	24	33	0	0	279	21	0.227115	3	3.22711	1.51154e-45	Q94126	Cell death specification protein 2.	Caenorhabditis elegans
JU066181	0	0	145	297	44	67	58	21	0.337506	1	1.33751	3.30673e-14	Q9Y5Z4	Heme-binding protein 2	Homo sapiens
JU063447	128	29	170	99	44	0	58	21	0.379087	0	0.379087	3.17314e-70	O18404	3-hydroxyacyl-CoA dehydrogenase type-2	Drosophila melanogaster
JU065887	0	89	145	231	178	67	0	21	0.350991	0	0.350991	2.86874e-10	Q9DAN9	Uncharacterized protein C17orf105 homolog.	Mus musculus
JU063282	385	0	121	33	0	0	0	21	0.253902	3	3.2539	4.28637e-10	ADP24262	TNF receptor-associated factor 6 [Haliotis diversicolor].	Haliotis diversicolor
JU064317	25	89	97	66	89	67	117	21	0.406757	0	0.406757	4.64959e-58	Q07984	Translocon-associated protein subunit delta	Rattus norvegicus
JU068216	0	89	121	198	133	0	58	21	0.362505	0	0.362505
JU068626	0	119	24	33	44	134	176	21	0.352812	0	0.352812
scaffold189	51	119	48	99	89	0	117	21	0.385835	0	0.385835	6.20701e-18	Q00899	Transcriptional repressor protein YY1	Mus musculus
JU063303	77	89	72	165	178	202	0	21	0.398739	0	0.398739	1.44065e-14	B4MRZ8	Eukaryotic translation initiation factor 3 subunit C	Drosophila willistoni
JU063843	0	119	243	66	0	0	73	21	0.314735	1	1.31473	4.83351e-124	P28352	DNA-(apurinic or apyrimidinic site) lyase	Mus musculus
JU069021	436	0	24	33	44	0	14	21	0.290103	3	3.2901
JU071537	0	239	48	264	44	0	29	21	0.338756	3	3.33876
JU068126	0	29	0	99	44	0	235	21	0.276146	2	2.27615
JU065445	154	89	97	165	44	0	29	21	0.386851	0	0.386851	3.12334e-09	Q8IXY8	Peptidyl-prolyl cis-trans isomerase-like 6	Homo sapiens
JU064986	77	29	97	198	133	0	58	21	0.389772	0	0.389772	2.17661e-10	Q5ZMM5	Zinc finger protein 706.	Gallus gallus
JU071758	102	0	170	132	0	67	73	21	0.352916	0	0.352916	1.29477e-18	Q640M1	U3 small nucleolar RNA-associated protein 14 homolog A	Mus musculus
JU070254	25	209	72	165	89	0	44	21	0.384298	0	0.384298
JU069145	0	0	510	0	0	0	0	21	0.163663	3	3.16366
JU067710	0	0	0	0	0	0	309	21	0.163662	3	3.16366
JU068889	0	0	0	0	0	0	309	21	0.163662	3	3.16366
scaffold619	0	89	24	0	89	134	191	21	0.327355	0	0.327355	3.41149e-07	Q9ULT8	E3 ubiquitin-protein ligase HECTD1	Homo sapiens
JU067877	0	239	48	0	44	538	29	21	0.338747	1	1.33875
JU064329	0	0	48	0	0	134	250	21	0.248261	0	0.248261	7.86174e-16	Q09024	Neural/ectodermal development factor IMP-L2	Drosophila melanogaster
JU069855	539	0	0	0	0	0	0	21	0.163659	3	3.16366
JU064719	128	59	48	99	0	0	132	21	0.349864	0	0.349864
JU063280	0	89	0	0	0	269	206	21	0.26692	0	0.26692	2.65063e-16	ADD64826	CTL-6 [Argopecten irradians].	Argopecten irradians
JU068697	0	29	145	297	178	0	14	21	0.337446	0	0.337446
JU066506	0	59	48	99	0	134	176	21	0.337075	0	0.337075
JU065193	77	89	72	66	89	134	88	21	0.424567	2	2.42457	1.29636e-10	Q6PBY3	Endothelial differentiation-related factor 1 homolog	Danio rerio
JU064971	25	149	170	99	133	0	29	21	0.384261	0	0.384261	1.39819e-17	Q5ZK88	Paraspeckle component 1.	Gallus gallus
JU068150	0	29	72	0	133	0	206	21	0.293049	0	0.293049
JU064754	282	119	24	66	44	0	29	21	0.3623	2	2.3623	3.89784e-12	Q502E5	UPF0708 protein C6orf162 homolog.	Danio rerio
JU065965	0	0	97	99	0	0	206	21	0.266906	1	1.26691	7.14571e-09	Q9N0V7	Cystathionine beta-synthase	Oryctolagus cuniculus
JU062712	0	29	194	66	356	0	29	21	0.338712	0	0.338712	1.94668e-06	P11233	Ras-related protein Ral-A	Homo sapiens
JU071749	0	119	0	99	222	202	88	21	0.362467	0	0.362467
JU069321	0	0	437	0	89	0	14	21	0.237706	3	3.23771
JU063957	0	29	97	0	89	0	206	21	0.291258	1	1.29126	9.33602e-09	P42577	Soma ferritin.	Lymnaea stagnalis
scaffold188	231	59	121	66	44	67	14	21	0.395119	0	0.395119	4.07053e-17	Q00547	Hyaluronan mediated motility receptor	Mus musculus
JU071368	0	59	72	33	89	538	73	21	0.37943	3	3.37943
scaffold539	0	59	48	33	401	67	88	21	0.36703	3	3.36703	5.60962e-13	Q99323	Myosin heavy chain, non-muscle	Drosophila melanogaster
JU071597	25	59	24	165	89	67	132	21	0.395124	0	0.395124	7.74433e-95	P41105	60S ribosomal protein L28.	Mus musculus
JU066028	179	29	194	99	0	0	29	21	0.343526	0	0.343526	9.78387e-29	Q9QXV3	Inhibitor of growth protein 1.	Mus musculus
JU064663	77	29	0	33	534	134	29	21	0.357959	3	3.35796	1.49211e-06	Q3UHC7	Disabled homolog 2-interacting protein	Mus musculus
JU065846	359	59	0	0	89	67	29	21	0.320799	3	3.3208	5.13433e-20	Q9CY57	Friend of PRMT1 protein	Mus musculus
JU062794	102	89	24	33	44	202	103	20	0.396839	1	1.39684	9.46632e-14	Q5ZMN2	DNA replication licensing factor MCM3.	Gallus gallus
JU069685	77	89	72	66	267	0	44	20	0.385474	2	2.38547
JU063363	128	149	97	66	44	0	44	20	0.379278	0	0.379278	1.05291e-12	EFV55900	hypothetical protein AND_21823 [Anopheles darlingi].	Anopheles darlingi
JU069825	0	0	243	66	44	0	103	20	0.293686	2	2.29369
JU062743	0	89	72	231	133	0	58	20	0.351532	0	0.351532	1.81446e-12	P62312	U6 snRNA-associated Sm-like protein LSm6.	Homo sapiens
JU063450	0	119	97	99	267	0	44	20	0.354088	1	1.35409	5.93324e-08	O18883	Thioredoxin domain-containing protein 9	Bos taurus
JU062991	0	89	72	33	0	403	103	20	0.341429	3	3.34143
JU069903	308	89	0	66	0	0	44	20	0.297971	3	3.29797
JU064297	154	89	72	33	222	134	0	20	0.3773	0	0.3773	0	Q05913	General transcription factor IIF subunit 1	Drosophila melanogaster
JU064578	0	29	145	165	44	0	103	20	0.333278	0	0.333278	1.53328e-42	Q2S2F5	Tryptophanase	Salinibacter ruber DSM 13855
JU062976	385	89	24	33	0	0	0	20	0.271626	3	3.27163
JU062696	0	29	0	0	0	0	279	20	0.191389	3	3.19139	7.10829e-46	O62650	Follistatin	Equus caballus
JU068325	0	29	0	0	0	0	279	20	0.191389	3	3.19139
JU062960	0	149	121	0	44	67	117	20	0.332183	0	0.332183
JU065814	51	0	97	132	89	67	103	20	0.374085	0	0.374085	2.1597e-33	Q9BZI7	Regulator of nonsense transcripts 3B	Homo sapiens
JU064461	154	239	72	33	0	67	14	20	0.357488	0	0.357488	1.43676e-06	Q1T769	Protein MIS12 homolog.	Gallus gallus
scaffold136	25	89	145	165	0	67	58	20	0.372072	0	0.372072	9.88358e-19	P34416	LIM and SH3 domain protein F42H10.3.	Caenorhabditis elegans
JU062674	462	0	0	0	89	0	0	20	0.202032	3	3.20203	1.52495e-06	ABE72943	vitelline envelope zona pellucida domain 8 [Haliotis corrugata].	Haliotis corrugata
JU070089	0	29	97	33	178	202	103	20	0.370635	0	0.370635
JU063704	0	0	0	0	0	0	294	20	0.159724	3	3.15972	4.30453e-38	P13734	Beta-agarase	Pseudoalteromonas atlantica
JU069630	0	0	0	0	0	0	294	20	0.159724	3	3.15972
JU064518	128	59	170	33	0	67	58	20	0.367712	0	0.367712	5.99034e-16	Q28FE4	MORN repeat-containing protein 5.	Xenopus (Silurana) tropicalis
JU064037	0	89	48	33	44	269	132	20	0.362389	1	1.36239	2.51192e-06	P52010	Peptidyl-prolyl cis-trans isomerase 2	Caenorhabditis elegans
JU064180	205	119	24	231	0	0	0	20	0.30266	0	0.30266	2.0817e-26	P81439	Equistatin.	Actinia equina
JU068053	77	209	145	33	133	0	0	20	0.341415	0	0.341415
JU063482	51	29	97	33	133	67	117	20	0.391952	0	0.391952	0	O44081	H/ACA ribonucleoprotein complex subunit 4	Drosophila melanogaster
JU063030	0	239	145	66	133	0	14	20	0.336564	0	0.336564
JU064469	0	119	97	33	311	0	58	20	0.344498	2	2.3445	1.17519e-08	Q24048	Sodium/potassium-transporting ATPase subunit beta-2	Drosophila melanogaster
JU063547	0	29	145	132	401	0	0	20	0.301762	2	2.30176	2.35277e-12	O88354	Pancreatic triacylglycerol lipase	Ictidomys tridecemlineatus
JU065528	77	89	97	99	0	134	73	20	0.387375	1	1.38738	1.254e-13	Q8R2M2	Deoxynucleotidyltransferase terminal-interacting protein 2.	Mus musculus
JU067064	411	59	24	0	0	67	0	20	0.264779	3	3.26478
JU066570	0	0	485	0	0	0	0	20	0.159718	3	3.15972
JU063018	0	29	0	99	133	67	176	20	0.318846	0	0.318846
JU062883	0	508	0	66	44	0	0	20	0.233481	3	3.23348	5.55844e-59	XP_002635561	Hypothetical protein CBG08875 [Caenorhabditis briggsae].	Caenorhabditis briggsae
JU069147	77	119	121	99	178	0	14	20	0.382127	0	0.382127
JU063117	102	359	24	0	44	67	14	20	0.337992	3	3.33799	5.99052e-08	A5GFN6	mRNA export factor	Sus scrofa
JU069859	0	59	145	66	222	336	0	20	0.348197	0	0.348197
JU063560	0	29	24	165	178	134	103	20	0.367693	0	0.367693	2.46067e-22	O94777	Dolichol phosphate-mannose biosynthesis regulatory protein.	Homo sapiens
JU063433	513	0	0	0	0	0	0	20	0.159714	3	3.15971	1.05878e-89	O14880	Microsomal glutathione S-transferase 3	Homo sapiens
JU063060	0	89	48	132	267	202	29	20	0.383621	0	0.383621
JU065917	0	89	97	66	178	134	73	20	0.385576	0	0.385576	1.92261e-06	Q9GZ71	Tropomyosin.	Haliotis diversicolor
JU063891	179	59	97	66	44	0	58	20	0.374069	0	0.374069	2.19606e-10	P33316	Deoxyuridine 5'-triphosphate nucleotidohydrolase, mitochondrial	Homo sapiens
JU065927	0	59	170	198	133	134	0	20	0.344823	0	0.344823	2.4311e-09	Q9H4G4	Golgi-associated plant pathogenesis-related protein 1	Homo sapiens
JU069598	154	59	48	132	44	202	29	20	0.407978	0	0.407978
JU070948	0	209	0	33	133	0	132	20	0.299192	0	0.299192
JU063741	0	0	24	0	0	67	265	20	0.222938	3	3.22294	8.70637e-34	P18421	Proteasome subunit beta type-1	Rattus norvegicus
JU066082	282	59	121	0	0	67	14	20	0.3202	2	2.3202	1.96031e-08	Q9ULJ7	Ankyrin repeat domain-containing protein 50.	Homo sapiens
scaffold636	0	59	243	66	0	0	88	20	0.301402	2	2.3014	1.60946e-21	Q9W5U2	Probable chitinase 3	Drosophila melanogaster
JU064524	0	29	24	0	133	67	206	20	0.302609	0	0.302609	7.46359e-19	Q29122	Unconventional myosin-VI	Sus scrofa
JU063227	231	0	24	198	178	0	0	20	0.301746	2	2.30175	1.43644e-06	ABO26628	vitalline coat protein C [Haliotis discus discus].	Haliotis discus
JU063462	0	59	0	0	0	0	265	20	0.202005	3	3.202	3.71312e-42	O35701	Matrilin-3	Mus musculus
scaffold206	51	179	0	99	89	67	88	20	0.373513	0	0.373513	2.0859e-45	O62742	Non-specific lipid-transfer protein	Oryctolagus cuniculus
JU063045	0	59	24	99	133	67	147	20	0.358553	0	0.358553
JU069313	154	89	72	33	89	67	44	19	0.395031	1	1.39503
JU063019	154	0	24	0	0	67	162	19	0.277384	1	1.27738
JU064701	0	0	24	66	44	0	220	19	0.260282	3	3.26028	4.46359e-140	Q4AEH5	Glutathione peroxidase 3	Hylobates lar
JU066480	0	89	243	66	0	0	58	19	0.296755	2	2.29675
JU066161	128	89	97	33	44	0	73	19	0.364469	0	0.364469	1.56048e-71	Q9Y284	Protein Asterix	Homo sapiens
JU064508	0	0	0	0	0	0	279	19	0.155687	3	3.15569	7.29747e-30	Q28719	Prostaglandin reductase 1	Oryctolagus cuniculus
JU068514	0	0	0	0	0	0	279	19	0.155687	3	3.15569
JU068783	77	29	24	198	44	0	103	19	0.350996	0	0.350996
JU063567	128	59	48	33	89	0	103	19	0.361593	0	0.361593	1.32221e-39	O95628	CCR4-NOT transcription complex subunit 4	Homo sapiens
JU064743	51	59	218	33	44	0	58	19	0.351031	3	3.35103	7.8583e-82	Q4V7T8	Ropporin-1-like protein.	Xenopus laevis
JU065886	51	59	72	0	0	67	162	19	0.317043	1	1.31704	1.27928e-10	Q9DAK9	14 kDa phosphohistidine phosphatase	Mus musculus
JU067799	411	0	72	0	0	0	0	19	0.204727	3	3.20473
JU068073	0	149	48	231	133	134	0	19	0.337234	0	0.337234
JU065109	0	89	72	132	222	0	58	19	0.346448	0	0.346448	6.56158e-07	Q6DK91	Eukaryotic translation initiation factor 3 subunit M	Xenopus (Silurana) tropicalis
JU063563	25	89	194	0	0	134	73	19	0.328964	0	0.328964	5.06717e-28	O94817	Ubiquitin-like protein ATG12	Homo sapiens
JU066823	25	89	97	198	44	202	14	19	0.389777	1	1.38978
JU070673	0	149	121	264	0	0	14	19	0.296435	0	0.296435
JU066535	51	29	48	165	222	67	44	19	0.394025	1	1.39403	5.19201e-73	XP_970045	PREDICTED: similar to CG12400 CG12400-PA [Tribolium castaneum].	Tribolium castaneum
JU070814	25	0	0	561	44	0	0	19	0.2187	3	3.2187
JU063504	334	149	0	33	0	0	0	19	0.244341	1	1.24434	2.46692e-06	O57472	Chordin	Danio rerio
JU066594	0	29	0	33	0	67	235	19	0.249982	3	3.24998
JU064366	25	0	72	165	89	0	117	19	0.328955	0	0.328955	3.0542e-12	Q0VFZ6	Uncharacterized protein C2orf77.	Homo sapiens
JU070865	0	149	24	165	178	67	44	19	0.364433	0	0.364433
JU064775	51	119	145	66	178	0	14	19	0.367047	0	0.367047	1.70562e-11	Q568A0	PRKR-interacting protein 1 homolog.	Danio rerio
JU063975	0	0	170	33	44	0	147	19	0.278863	2	2.27886	6.57498e-15	P46507	26S protease regulatory subunit 6B	Manduca sexta
JU064994	25	179	72	132	89	202	0	19	0.368846	0	0.368846	8.96758e-12	Q61188	Histone-lysine N-methyltransferase EZH2	Mus musculus
JU064181	25	0	24	0	178	0	191	19	0.271623	3	3.27162	5.08268e-31	P82003	Prothoracicostatic peptide	Bombyx mori
JU068044	102	89	97	99	89	67	29	19	0.403275	1	1.40328
scaffold108	25	59	48	132	89	0	117	19	0.359663	0	0.359663	6.88696e-12	P12370	cAMP-dependent protein kinase catalytic subunit	Drosophila melanogaster
JU063352	0	179	121	132	178	0	0	19	0.310184	2	2.31018	2.64632e-16	EFA78906	Arf GTPase activating protein [Polysphondylium pallidum PN500].	Polysphondylium pallidum
JU063849	25	59	48	66	178	0	117	19	0.359663	0	0.359663	6.62889e-44	P28648	CD63 antigen	Rattus norvegicus
JU067156	0	0	48	33	89	67	191	19	0.301196	1	1.3012
JU065742	488	0	0	0	0	0	0	19	0.155668	3	3.15567	1.10614e-09	Q96N20	Zinc finger protein 75A.	Homo sapiens
JU063022	0	269	72	99	89	67	14	19	0.352758	2	2.35276
JU064651	77	29	48	66	44	269	88	19	0.393203	3	3.3932	2.23443e-31	Q3TLH4	Protein PRRC2C	Mus musculus
scaffold423	77	29	97	33	133	67	88	19	0.389747	0	0.389747	1.107e-06	Q7ZU99	Transitional endoplasmic reticulum ATPase	Danio rerio
scaffold140	128	179	72	66	0	67	29	19	0.36589	0	0.36589	1.46368e-06	P35604	Coatomer subunit zeta-1	Bos taurus
JU069418	51	0	0	0	89	67	206	19	0.270343	1	1.27034
JU065674	154	179	24	99	0	67	29	19	0.358716	0	0.358716	4.87935e-26	Q93104	Enhancer of rudimentary homolog.	Aedes aegypti
JU067518	0	0	24	462	44	67	29	19	0.291251	3	3.29125
JU069550	0	29	0	0	0	0	265	19	0.187216	3	3.18722
scaffold329	0	149	170	99	89	0	29	19	0.33718	0	0.33718	2.4978e-22	Q5TZA2	Rootletin	Homo sapiens
scaffold302	179	119	72	66	44	0	29	19	0.364478	0	0.364478	3.68817e-86	Q5F371	Protein strawberry notch homolog 1.	Gallus gallus
JU067544	0	179	24	99	133	0	88	19	0.334369	0	0.334369
JU065880	0	0	0	0	757	0	29	19	0.197716	3	3.19772	2.60129e-11	Q9D8B6	Protein FAM210B.	Mus musculus
JU063010	0	29	24	66	89	471	88	19	0.354376	3	3.35438
JU067076	0	89	291	0	89	0	29	19	0.286549	3	3.28655
JU064685	0	0	267	33	44	0	88	19	0.27734	2	2.27734	1.74515e-111	Q3ZC04	Ribosomal protein 63, mitochondrial	Bos taurus
JU062936	0	29	291	132	0	0	29	19	0.281298	1	1.2813
JU071494	128	89	24	231	89	0	0	18	0.322465	0	0.322465
JU066322	0	269	24	0	44	0	103	18	0.273101	2	2.2731	1.79729e-156	XP_002426349	hypothetical protein Phum_PHUM249040 [Pediculus humanus corporis].	Pediculus humanus
JU069648	0	89	194	66	44	0	58	18	0.32056	1	1.32056
JU066357	231	89	24	33	44	0	44	18	0.338046	2	2.33805	8.56339e-15	XP_002595753	hypothetical protein BRAFLDRAFT_141024, partial [Branchiostoma floridae].	Branchiostoma floridae
scaffold677	0	119	97	165	44	67	44	18	0.356036	0	0.356036	1.27164e-10	XP_002738993	PREDICTED: hypothetical protein [Saccoglossus kowalevskii].	Saccoglossus kowalevskii
JU064823	102	89	145	99	89	0	0	18	0.333156	2	2.33316	7.25624e-14	Q5F339	Cytochrome c-type heme lyase	Gallus gallus
JU064269	25	89	97	66	356	0	0	18	0.320547	3	3.32055	5.25909e-12	Q02224	Centromere-associated protein E	Homo sapiens
JU063199	0	119	0	0	133	202	117	18	0.296178	2	2.29618	4.45948e-32	AAX11339	developmentally-regulated tft1 [Haliotis asinina].	Haliotis asinina
JU065328	77	149	48	0	178	67	44	18	0.361247	0	0.361247	8.91014e-29	Q7ZWJ3	Oligosaccharyltransferase complex subunit ostc.	Danio rerio
JU063893	462	0	0	0	0	0	0	18	0.151531	3	3.15153	2.31271e-52	P33417	Intrastrand cross-link recognition protein	Saccharomyces cerevisiae
contig5701	462	0	0	0	0	0	0	18	0.151531	3	3.15153
JU071705	462	0	0	0	0	0	0	18	0.151531	3	3.15153
scaffold588	0	89	97	132	89	134	44	18	0.367606	0	0.367606	2.07954e-08	Q9JLI7	Sperm-associated antigen 6	Mus musculus
JU064113	25	0	97	132	0	134	103	18	0.323579	1	1.32358	4.76452e-21	P61356	60S ribosomal protein L27.	Bos taurus
JU064985	25	239	48	165	44	67	0	18	0.338544	0	0.338544	3.52117e-16	Q5ZMJ9	Serine/arginine repetitive matrix protein 1.	Gallus gallus
JU063697	0	89	218	66	133	0	14	18	0.317076	0	0.317076	8.2609e-10	P12716	Actin, cytoplasmic	Pisaster ochraceus
JU066517	0	59	24	0	133	67	162	18	0.302243	0	0.302243	1.64703e-57	XP_783974	PREDICTED: hypothetical protein [Strongylocentrotus purpuratus].	Strongylocentrotus purpuratus
JU066179	102	119	48	0	267	67	14	18	0.352267	1	1.35227	5.80902e-11	Q9Y5B8	Nucleoside diphosphate kinase 7	Homo sapiens
JU063162	102	89	145	33	89	67	14	18	0.378407	0	0.378407	1.65034e-34	A8E4N3	Radial spoke head protein 3 homolog	Bos taurus
JU064569	77	119	121	33	0	0	73	18	0.32873	0	0.32873	3.94488e-52	Q2KKX7	Dolichyl-diphosphooligosaccharide--protein glycosyltransferase subunit STT3A	Bos taurus
JU065233	0	0	24	33	0	0	235	18	0.214289	3	3.21429	6.8455e-12	Q6YHK3	CD109 antigen	Homo sapiens
JU070055	0	29	48	0	133	0	176	18	0.2718	0	0.2718
JU067549	0	0	48	0	713	0	0	18	0.193371	3	3.19337
JU064193	51	119	24	330	0	0	14	18	0.306296	2	2.3063	8.33292e-63	P82798	Transcriptional regulator ATRX	Macropus eugenii
JU071621	0	29	24	0	0	0	235	18	0.214282	3	3.21428	3.66994e-31	Q15582	Transforming growth factor-beta-induced protein ig-h3	Homo sapiens
JU067190	282	29	97	33	44	0	0	18	0.297027	2	2.29703
JU065470	51	269	24	99	44	67	14	18	0.362355	2	2.36236	1.78155e-12	Q8K2V1	Serine/threonine-protein phosphatase 4 regulatory subunit 1.	Mus musculus
JU069226	0	0	24	198	44	134	117	18	0.310435	0	0.310435
JU070616	0	119	0	33	133	67	132	18	0.311851	0	0.311851
JU066337	0	0	437	0	0	0	0	18	0.15152	3	3.15152
JU071709	25	29	0	33	133	202	132	18	0.337994	0	0.337994
JU066925	0	29	24	0	0	202	191	18	0.262048	3	3.26205
JU071188	0	179	24	0	267	0	73	18	0.290531	0	0.290531
scaffold194	77	119	24	66	267	0	29	18	0.357477	1	1.35748	2.35277e-12	Q02040	A-kinase anchor protein 17A	Homo sapiens
JU065608	0	179	121	165	89	0	0	18	0.297696	0	0.297696	2.65224e-72	Q90963	Paired mesoderm homeobox protein 2	Gallus gallus
JU065115	25	149	72	33	89	67	73	18	0.379212	0	0.379212	2.98283e-28	Q6EWQ7	Eukaryotic translation initiation factor 5A-1	Bos taurus
JU071689	0	29	48	33	0	67	191	18	0.286398	2	2.2864
JU062973	0	59	0	0	311	67	117	18	0.281704	2	2.2817
JU063206	282	29	48	66	44	0	14	18	0.326581	3	3.32658	1.05931e-12	AAX26489	SJCHGC08494 protein, partial [Schistosoma japonicum].	Schistosoma japonicum
JU069285	0	29	48	132	133	202	73	18	0.361209	0	0.361209
JU065451	179	29	170	33	44	0	14	18	0.331808	3	3.33181	0	Q8IYD1	Eukaryotic peptide chain release factor GTP-binding subunit ERF3B	Homo sapiens
JU065638	0	0	0	0	0	0	265	18	0.151513	3	3.15151	4.25816e-19	Q91XA9	Acidic mammalian chitinase	Mus musculus
JU067116	0	0	0	0	0	0	265	18	0.151513	3	3.15151
JU065195	282	29	97	0	0	67	14	18	0.296979	2	2.29698	2.03102e-16	Q6PCD5	E3 ubiquitin-protein ligase RFWD3	Homo sapiens
JU063895	102	29	121	33	133	134	29	18	0.385547	2	2.38555	8.03732e-58	P33731	Signal recognition particle 72 kDa protein	Canis lupus
JU066124	0	119	48	132	222	134	14	18	0.359409	0	0.359409	1.14645e-11	Q9VJ33	NEDD8	Drosophila melanogaster
JU067917	0	59	24	0	222	67	132	18	0.308911	0	0.308911
JU063617	0	29	48	33	0	0	206	18	0.255544	3	3.25554	4.22006e-46	P04929	Histidine-rich glycoprotein	Plasmodium lophurae
JU065816	25	119	97	165	89	0	29	18	0.359408	0	0.359408	9.19994e-29	Q9C005	Protein dpy-30 homolog	Homo sapiens
JU065785	231	29	24	198	0	67	0	18	0.301736	1	1.30174	2.70084e-99	Q99N85	28S ribosomal protein S18a, mitochondrial	Mus musculus
JU071304	0	59	72	66	222	336	14	18	0.358257	0	0.358257
JU065987	0	299	0	33	89	202	29	18	0.311479	0	0.311479	1.095e-09	Q9NPJ6	Mediator of RNA polymerase II transcription subunit 4	Homo sapiens
JU071572	0	59	170	66	0	67	88	18	0.31866	0	0.31866	3.98869e-28	B8I6E7	Translation initiation factor IF-2.	Clostridium cellulolyticum
JU067052	0	59	97	132	44	67	88	18	0.352244	0	0.352244
JU065713	102	59	24	66	311	0	29	18	0.353104	2	2.3531	7.17873e-22	Q96BK5	PIN2/TERF1-interacting telomerase inhibitor 1	Homo sapiens
JU065145	102	59	24	99	222	67	29	18	0.385533	2	2.38553	5.29466e-12	Q6NRB5	Transcriptional adapter 2-beta.	Xenopus laevis
JU071069	256	59	0	99	0	67	29	18	0.311451	2	2.31145
JU063628	0	89	0	33	133	202	103	17	0.315814	0	0.315814	1.42815e-09	P07202	Thyroid peroxidase	Homo sapiens
scaffold190	154	119	24	0	89	67	44	17	0.342735	0	0.342735	4.12655e-70	Q01105	Protein SET	Homo sapiens
JU063501	0	89	97	99	133	67	44	17	0.354609	0	0.354609	5.08058e-20	O55234	Proteasome subunit beta type-5	Mus musculus
JU068520	0	0	0	0	44	67	220	17	0.20977	3	3.20977
JU062862	128	89	0	33	133	67	58	17	0.346457	0	0.346457	6.21441e-46	Q9NQG1	Protein MANBAL.	Homo sapiens
JU066055	0	59	243	0	44	67	44	17	0.296756	3	3.29676	1.66875e-10	Q9TU32	Protein ERGIC-53	Chlorocebus aethiops
JU066150	0	119	97	0	44	0	117	17	0.279619	0	0.279619	1.11336e-06	Q9XSJ0	Ubiquitin carboxyl-terminal hydrolase isozyme L5	Bos taurus
JU065090	51	119	97	0	133	0	58	17	0.32668	0	0.32668	1.34591e-12	Q6DET9	Elongation factor 1-beta	Xenopus (Silurana) tropicalis
JU064826	154	89	72	99	89	0	0	17	0.323587	0	0.323587	1.301e-39	Q5F3G0	Rho GTPase-activating protein 19	Gallus gallus
JU063506	51	239	72	33	44	134	0	17	0.335343	0	0.335343	1.35918e-20	EEZ97284	hypothetical protein TcasGA2_TC011088 [Tribolium castaneum].	Tribolium castaneum
JU066076	0	89	97	165	89	0	44	17	0.325538	0	0.325538	8.86844e-12	Q9UK58	Cyclin-L1	Homo sapiens
JU067646	0	119	24	0	133	403	44	17	0.318369	2	2.31837
JU063898	0	0	0	66	0	0	220	17	0.188835	3	3.18883	2.08231e-59	P34714	SPARC	Caenorhabditis elegans
JU064892	0	59	72	231	89	0	44	17	0.319236	2	2.31924	4.616e-22	Q5RCB7	Protein FAM60A.	Pongo abelii
JU062913	0	89	0	198	0	67	103	17	0.279558	0	0.279558
JU063113	77	29	72	33	44	269	58	17	0.373735	3	3.37373	1.66621e-27	A4QND5	60S ribosome subunit biogenesis protein NIP7 homolog.	Xenopus (Silurana) tropicalis
JU071258	0	29	170	297	0	0	0	17	0.237351	0	0.237351
JU068990	0	29	0	33	0	269	162	17	0.261304	0	0.261304
JU071619	102	0	97	165	0	0	58	17	0.294156	0	0.294156	2.39512e-06	Q13330	Metastasis-associated protein MTA1.	Homo sapiens
JU063700	77	89	24	0	44	202	88	17	0.344511	1	1.34451	6.50005e-177	P13086	Succinyl-CoA ligase [ADP/GDP-forming] subunit alpha, mitochondrial	Rattus norvegicus
JU064660	77	0	121	0	133	67	73	17	0.319154	0	0.319154	2.18859e-18	Q3UEB3	Poly(U)-binding-splicing factor PUF60	Mus musculus
JU070789	0	29	97	33	44	134	117	17	0.330094	0	0.330094
JU064465	0	0	0	33	0	269	176	17	0.23086	1	1.23086	6.33133e-10	Q20942	Zinc metalloproteinase nas-38	Caenorhabditis elegans
JU064397	0	29	72	33	178	67	103	17	0.33491	0	0.33491	9.58432e-14	Q14094	Cyclin-I.	Homo sapiens
JU069467	0	29	0	0	0	0	235	17	0.178564	3	3.17856
JU068336	25	29	0	198	44	0	117	17	0.295643	0	0.295643
JU065901	0	29	97	99	222	0	58	17	0.320279	1	1.32028	1.57815e-08	Q9ESD7	Dysferlin	Mus musculus
JU066571	0	0	0	0	0	0	250	17	0.147251	3	3.14725
JU067387	0	0	0	0	0	0	250	17	0.147251	3	3.14725
JU070544	0	0	0	0	0	0	250	17	0.147251	3	3.14725
JU070579	0	0	0	0	0	0	250	17	0.147251	3	3.14725
JU065160	334	29	24	66	0	0	0	17	0.250693	3	3.25069	8.47601e-07	Q6NVN0	Transcription factor Sox-2	Xenopus (Silurana) tropicalis
JU071090	0	119	97	165	178	0	0	17	0.29414	1	1.29414
JU063402	0	89	97	198	44	134	14	17	0.342693	0	0.342693	1.34633e-54	O01393	Innexin unc-9	Caenorhabditis elegans
JU065562	334	29	0	99	0	0	0	17	0.226326	3	3.22633	1.20834e-08	Q8UWA5	Carbonic anhydrase 2	Tribolodon hakonensis
JU068092	334	29	0	99	0	0	0	17	0.226326	3	3.22633
JU066117	128	119	0	66	0	0	88	17	0.289269	1	1.28927	6.21358e-21	Q9VE04	39S ribosomal protein L55, mitochondrial	Drosophila melanogaster
JU067379	51	89	72	99	133	67	29	17	0.384142	0	0.384142
JU065323	77	0	72	66	133	0	88	17	0.323558	0	0.323558	5.68883e-88	Q7ZVY5	Citrate synthase, mitochondrial	Danio rerio
JU066274	25	59	24	165	356	0	0	17	0.302796	1	1.3028	2.15282e-10	XP_001867470	cathepsin l [Culex quinquefasciatus].	Culex quinquefasciatus
JU065229	25	59	170	132	44	67	14	17	0.359254	0	0.359254	4.53515e-08	Q6WV74	Histone H4.	Mytilus chilensis
JU063058	0	29	388	0	0	0	0	17	0.178555	3	3.17855
JU068435	77	179	24	0	0	403	14	17	0.308225	1	1.30822
JU071207	0	59	48	66	44	67	132	17	0.330078	0	0.330078
JU071461	308	59	0	33	89	0	0	17	0.26042	3	3.26042
JU063126	25	59	48	297	0	134	14	17	0.330055	1	1.33005	5.81433e-90	A6NEE1	Pleckstrin homology domain-containing family D member 1	Homo sapiens
JU064303	25	29	72	0	133	202	88	17	0.344472	0	0.344472	0	Q06265	Exosome complex component RRP45	Homo sapiens
JU070282	0	59	97	0	89	0	132	17	0.279564	0	0.279564
JU067996	0	59	24	99	89	67	117	17	0.335288	0	0.335288
JU062967	0	89	24	33	0	134	147	17	0.296722	0	0.296722
JU064999	102	29	72	198	89	0	14	17	0.342665	0	0.342665	5.53824e-06	Q61686	Chromobox protein homolog 5	Mus musculus
scaffold80	0	149	0	66	133	403	14	17	0.315385	2	2.31539	1.6913e-15	O93308	Structural maintenance of chromosomes protein 1A	Xenopus laevis
JU062818	179	59	72	66	0	202	0	17	0.3192	1	1.3192	6.86623e-12	Q761V0	Sodium- and chloride-dependent glycine transporter 2	Mus musculus
JU063326	77	59	48	132	222	0	14	17	0.349836	0	0.349836	8.70612e-12	C0H859	Nuclear cap-binding protein subunit 2	Salmo salar
scaffold298	0	29	97	165	89	0	73	17	0.317338	0	0.317338	3.19912e-09	Q5E9K0	Proteasome subunit beta type-2.	Bos taurus
JU064586	0	209	121	66	44	0	29	17	0.311048	0	0.311048	3.60757e-18	Q2TBP7	Proteasome subunit beta type-7	Bos taurus
JU070980	231	59	48	66	44	0	14	17	0.330057	3	3.33006
JU070209	0	0	24	198	0	605	14	17	0.266014	2	2.26601
JU065180	0	59	0	231	0	134	88	17	0.282949	0	0.282949	1.68179e-10	Q6P643	THO complex subunit 7 homolog.	Xenopus (Silurana) tropicalis
JU067904	0	149	97	132	0	134	29	17	0.32368	0	0.32368
JU064093	0	179	24	33	178	202	29	17	0.342653	3	3.34265	1.36847e-20	P58165	Plasma membrane calcium-transporting ATPase 2	Oreochromis mossambicus
JU067146	0	59	48	66	89	202	88	17	0.351328	1	1.35133
scaffold79	154	29	0	33	44	0	103	16	0.289144	0	0.289144	1.90098e-14	O93279	Amyloid beta A4 protein	Takifugu rubripes
JU063474	0	0	72	33	44	0	162	16	0.251768	1	1.25177	5.74745e-09	O43324	Eukaryotic translation elongation factor 1 epsilon-1	Homo sapiens
JU064688	128	59	48	0	0	0	103	16	0.275381	0	0.275381	0	Q3ZCC9	Protein SEC13 homolog	Bos taurus
JU068043	0	179	48	0	44	0	103	16	0.268225	0	0.268225
JU064305	25	0	48	0	89	0	162	16	0.255197	0	0.255197	2.1678e-79	Q06831	Transcription factor SOX-4.	Mus musculus
JU064478	25	0	48	0	44	0	176	16	0.245684	3	3.24568	1.25375e-49	Q24583	V-type proton ATPase subunit F 1	Drosophila melanogaster
JU065187	25	119	72	0	178	67	44	16	0.338025	0	0.338025	1.17558e-14	Q6P877	Proteasomal ubiquitin receptor ADRM1.	Xenopus (Silurana) tropicalis
JU066790	282	89	24	0	44	0	0	16	0.25177	3	3.25177
JU070952	0	29	218	66	0	67	44	16	0.290943	3	3.29094
JU069644	0	29	0	0	0	0	220	16	0.174036	3	3.17404
JU068913	0	59	97	66	44	0	103	16	0.302664	0	0.302664
JU064838	0	119	24	132	133	67	44	16	0.338021	0	0.338021	1.24101e-29	Q5I4F9	Aquaporin-4	Notomys alexis
scaffold353	77	0	24	99	222	67	44	16	0.336882	1	1.33688	1.64967e-87	Q62599	Metastasis-associated protein MTA1.	Rattus norvegicus
JU063396	25	29	72	66	89	0	103	16	0.328796	0	0.328796	7.96578e-58	O00487	26S proteasome non-ATPase regulatory subunit 14	Homo sapiens
contig5875	411	0	0	0	0	0	0	16	0.142863	3	3.14286
JU068142	411	0	0	0	0	0	0	16	0.142863	3	3.14286
JU071566	0	0	0	0	0	0	235	16	0.142862	3	3.14286	3.25962e-33	ABC00192	vm2 [Haliotis asinina].	Haliotis asinina
JU063721	0	0	0	0	0	0	235	16	0.142862	3	3.14286	4.37114e-11	P15475	Actin, cytoplasmic 1	Xenopus borealis
JU066488	0	0	0	0	0	0	235	16	0.142862	3	3.14286	3.38875e-84	XP_002742206	PREDICTED: predicted protein-like [Saccoglossus kowalevskii].	Saccoglossus kowalevskii
JU068464	0	0	0	0	0	0	235	16	0.142862	3	3.14286
JU070572	0	0	0	0	0	0	235	16	0.142862	3	3.14286
JU070818	0	0	0	0	0	0	235	16	0.142862	3	3.14286
JU065857	231	29	24	0	44	67	44	16	0.311873	3	3.31187	9.18546e-17	Q9D1K7	UPF0687 protein C20orf27 homolog.	Mus musculus
JU071697	154	119	0	0	0	67	73	16	0.274487	0	0.274487
JU064236	25	89	121	0	89	0	73	16	0.30781	0	0.30781	2.09e-21	P97376	Protein FRG1	Mus musculus
JU063461	0	0	0	0	133	67	176	16	0.221292	0	0.221292	1.19884e-16	O35490	Betaine--homocysteine S-methyltransferase 1.	Mus musculus
scaffold238	0	0	0	0	133	67	176	16	0.221292	0	0.221292	1.02602e-07	Q27580	Adenosylhomocysteinase	Drosophila melanogaster
JU065579	0	0	48	165	44	0	117	16	0.267111	0	0.267111	1.74797e-20	Q8VEH3	ADP-ribosylation factor-like protein 8A	Mus musculus
JU063731	25	29	48	66	133	202	58	16	0.367592	0	0.367592	1.94091e-06	P17078	60S ribosomal protein L35.	Rattus norvegicus
JU065930	154	29	24	0	133	0	73	16	0.300627	0	0.300627
scaffold117	231	89	48	66	0	0	0	16	0.270024	2	2.27002	5.41529e-17	P18754	Regulator of chromosome condensation	Homo sapiens
JU069155	0	29	48	0	0	67	176	16	0.245644	2	2.24564
JU062795	0	59	145	0	0	269	58	16	0.28084	0	0.28084	4.7101e-37	Q5ZPJ7	Protease inhibitor NACI	Naja atra
JU066169	231	89	24	33	89	0	0	16	0.290939	2	2.29094	2.94922e-07	Q9Y345	Sodium- and chloride-dependent glycine transporter 2	Homo sapiens
JU066816	0	149	145	0	0	0	73	16	0.247199	0	0.247199
JU065527	0	119	48	33	0	0	132	16	0.264794	1	1.26479	7.71489e-16	Q8R189	Monocyte to macrophage differentiation factor 2	Mus musculus
JU062834	0	89	24	99	178	67	58	16	0.338	0	0.338	1.87799e-30	Q8S1Y9	Calmodulin-like protein 1	Oryza sativa Japonica Group
JU066406	25	29	194	165	0	67	0	16	0.288005	0	0.288005
JU066320	0	59	24	132	89	0	103	16	0.302636	0	0.302636	4.39869e-21	XP_002415842	NADH:ubiquinone oxidoreductase, NDUFB6/B17 subunit, putative [Ixodes scapularis].	Ixodes scapularis
JU069006	0	89	24	132	0	202	73	16	0.310722	0	0.310722
JU063515	0	359	24	66	44	0	0	16	0.245661	3	3.24566	9.12124e-17	EFN82836	hypothetical protein EAI_01530 [Harpegnathos saltator].	Harpegnathos saltator
JU063602	0	59	97	0	89	0	117	16	0.273446	0	0.273446	1.42732e-09	P02461	Collagen alpha-1(III) chain	Homo sapiens
JU064792	0	59	48	33	44	134	117	16	0.32396	0	0.32396
JU062714	0	29	0	33	89	0	176	16	0.245636	0	0.245636	8.10862e-42	P15513	Myomodulin neuropeptides 1	Aplysia californica
scaffold541	0	59	97	99	44	134	58	16	0.341437	0	0.341437	9.64529e-06	Q99848	Probable rRNA-processing protein EBP2	Homo sapiens
JU064076	25	179	97	33	133	0	14	16	0.327891	0	0.327891	1.23495e-58	P55201	Peregrin	Homo sapiens
scaffold23	0	0	388	0	0	0	0	16	0.142852	3	3.14285	1.12588e-108	A8K2U0	Alpha-2-macroglobulin-like protein 1	Homo sapiens
JU068628	0	0	388	0	0	0	0	16	0.142852	3	3.14285
JU066667	0	89	267	66	0	0	0	16	0.230815	2	2.23081
JU065942	0	29	48	0	0	0	191	16	0.21498	3	3.21498	3.14857e-41	Q9IB84	Proteasome subunit beta type-1-A	Carassius auratus
JU067332	282	119	0	0	0	0	14	16	0.225569	2	2.22557
JU064266	0	59	72	198	44	269	0	16	0.306985	0	0.306985	2.67461e-13	Q01603	Peroxidase	Drosophila melanogaster
JU071738	25	29	0	33	0	0	191	16	0.235898	3	3.2359
JU064665	0	0	24	0	44	0	206	16	0.205066	3	3.20507	5.2783e-29	Q3UMW8	Ceroid-lipofuscinosis neuronal protein 5 homolog	Mus musculus
JU064362	205	29	121	66	0	0	0	16	0.267078	0	0.267078	3.5685e-29	Q0VD50	Nicotinamide mononucleotide adenylyltransferase 1	Bos taurus
JU067333	0	59	48	99	133	134	58	16	0.346647	0	0.346647
JU066039	0	0	0	33	44	0	206	16	0.205059	3	3.20506	9.16673e-18	Q9R045	Angiopoietin-related protein 2	Mus musculus
scaffold2	0	0	72	0	0	202	147	16	0.23665	0	0.23665	1.32114e-15	A0AUT1	Trichoplein keratin filament-binding protein	Xenopus laevis
JU062989	0	29	0	99	89	134	117	16	0.299572	0	0.299572
contig5438	282	0	0	33	44	134	14	16	0.276072	1	1.27607
JU064625	0	29	72	33	222	67	73	16	0.328692	2	2.32869	2.61762e-16	Q3MHN0	Proteasome subunit beta type-6	Bos taurus
JU064290	25	89	97	132	89	0	29	16	0.341416	0	0.341416	5.27316e-12	Q04589	Fibroblast growth factor receptor 1	Rattus norvegicus
JU063803	0	0	315	99	0	0	0	16	0.190613	3	3.19061	2.06431e-16	P24733	Myosin heavy chain, striated muscle.	Argopecten irradians
JU066620	231	59	0	66	133	0	0	16	0.269992	0	0.269992
JU069314	0	179	48	165	44	67	14	16	0.324962	1	1.32496
JU065088	128	0	24	66	89	269	29	16	0.338487	1	1.33849	4.82709e-50	Q6DDU5	Small acidic protein.	Xenopus laevis
JU064989	0	59	72	33	89	202	73	16	0.340278	1	1.34028	3.99706e-12	Q60779	Growth arrest-specific protein 8	Mus musculus
JU065673	51	29	121	165	44	0	29	16	0.332132	0	0.332132	5.72625e-59	Q92979	Ribosomal RNA small subunit methyltransferase NEP1	Homo sapiens
scaffold227	0	29	243	33	89	0	29	16	0.285329	2	2.28533	2.31101e-46	Q1ENI8	Peroxidasin homolog	Caenorhabditis elegans
JU065972	0	89	48	198	44	134	29	16	0.336551	0	0.336551	3.66058e-10	Q9NAH4	Density-regulated protein homolog.	Caenorhabditis elegans
JU064778	0	179	121	0	44	134	29	16	0.304039	0	0.304039	3.69945e-11	Q56A24	Kelch-like protein 24	Rattus norvegicus
JU071328	0	59	48	132	133	0	73	16	0.314135	0	0.314135
scaffold674	0	149	72	165	44	0	29	16	0.307771	0	0.307771	7.73573e-40	XP_002735022	PREDICTED: hypothetical protein [Saccoglossus kowalevskii].	Saccoglossus kowalevskii
scaffold624	282	0	0	66	44	0	29	16	0.255147	3	3.25515	4.88938e-87	Q9V7N5	V-type proton ATPase subunit C	Drosophila melanogaster
JU066931	0	29	97	66	133	269	29	16	0.341396	0	0.341396
JU064111	0	149	97	165	0	0	29	16	0.281612	0	0.281612	7.59193e-16	P61217	DNA-directed RNA polymerases I, II, and III subunit RPABC2	Cricetulus griseus
JU064787	0	59	97	66	133	202	29	16	0.346619	0	0.346619	9.90381e-32	Q58CS6	Intraflagellar transport protein 20 homolog.	Bos taurus
JU069796	25	179	72	132	0	0	29	16	0.306949	0	0.306949
JU064120	0	59	72	66	44	134	88	16	0.336545	0	0.336545	6.92482e-09	P61865	60S ribosomal protein L12.	Caenorhabditis briggsae
JU067777	179	119	0	33	89	0	29	16	0.302593	0	0.302593
JU071262	77	59	24	99	178	67	29	16	0.367523	1	1.36752

## Sheet: Physical counts and σ rules
	Ni								σ rules
SeqID	2Cell	Moru.	Troc.	19Vel.	58Vel.	74Vel.	144Pl.	Total	2Cell	Moru.	Troc.	19Vel.	58Vel.	74Vel.	144Pl.	average
JU063545	1223	1810	1156	1103	951	272	728	7243	8.74257	10.6375	8.49977	8.30463	7.70905	4.12403	6.74439	7.82313
JU064608	1245	1388	824	1028	696	227	662	6070	8.82097	9.31539	7.17502	8.01562	6.594	3.76834	6.43124	7.16008
JU064611	708	789	532	571	435	182	280	3497	6.65207	7.02229	5.76629	5.97391	5.21417	3.37257	4.18328	5.45494
JU071714	1	376	702	811	430	358	793	3471	0.25004	4.84767	6.62382	7.11951	5.18412	4.73007	7.04007	5.11361
JU064609	100	851	442	735	397	141	433	3099	2.50001	7.29297	5.25595	6.77772	4.98121	2.96849	5.20215	4.99693
JU071754	375	736	548	708	380	80	269	3096	4.84123	6.78234	5.85235	6.65206	4.8734	2.236	4.10032	5.04824
JU063890	110	267	1375	390	85	162	574	2963	2.62203	4.08503	9.27093	4.93711	2.30808	3.17944	5.98698	4.62708
JU063381	348	554	425	447	335	121	553	2783	4.66368	5.8843	5.15389	5.28559	4.57575	2.74992	5.87898	4.88459
JU063200	0	10	12	7	3	20	2687	2739	0	0.790576	0.865958	0.661504	0.433039	1.11798	12.9591	2.40402
JU063900	1312	326	273	346	197	44	92	2590	9.05539	4.51388	4.13069	4.65026	3.50892	1.65827	2.3979	4.27362
JU071628	804	387	257	347	207	65	126	2193	7.08873	4.91809	4.0078	4.65699	3.59688	2.01549	2.80622	4.15574
JU071629	333	426	376	344	311	87	303	2180	4.56038	5.15798	4.84713	4.63811	4.40919	2.33435	4.35153	4.32838
JU071577	1166	287	221	231	152	64	39	2160	8.53669	4.23527	3.71652	3.79968	3.0822	1.99993	1.5612	3.84736
JU064489	1	164	308	233	141	316	700	1863	0.25004	3.20156	4.38748	3.81609	2.96858	4.44394	6.61436	3.66887
JU065621	0	311	431	332	254	235	124	1687	0	4.40881	5.19013	4.55521	3.98435	3.8323	2.78389	3.53638
JU062677	76	156	101	118	151	66	974	1642	2.17946	3.12248	2.51245	2.71569	3.07206	2.03093	7.80223	3.3479
JU064614	471	232	210	210	134	50	213	1520	5.42563	3.80788	3.62283	3.62284	2.89396	1.76771	3.64861	3.54135
JU071627	422	266	142	172	82	27	108	1219	5.13566	4.07738	2.97911	3.27871	2.26384	1.299	2.59808	3.09025
JU070508	0	135	350	328	250	80	49	1192	0	2.90473	4.67707	4.52769	3.95284	2.236	1.75002	2.86405
JU062954	192	287	175	128	222	49	94	1147	3.4641	4.23527	3.30719	2.82843	3.72491	1.74995	2.42387	3.10482
JU071733	82	184	267	215	112	58	135	1053	2.26383	3.39117	4.08504	3.66571	2.64576	1.90389	2.9047	2.98001
JU065894	635	129	98	52	56	25	26	1021	6.29879	2.83518	2.47853	1.79467	1.86894	1.24141	1.27471	2.54175
JU063675	10	72	218	151	85	123	355	1014	0.790542	2.12132	3.6912	3.07206	2.30488	2.77254	4.71034	2.78041
JU062878	21	56	401	32	48	75	340	973	1.14562	1.87083	5.00923	1.41418	1.73203	2.16498	4.60978	2.56381
JU063815	510	164	71	87	48	3	4	887	5.6458	3.20156	2.10655	2.33186	1.73203	0.433035	0.500016	2.27869
JU062744	239	177	153	120	71	11	109	880	3.8649	3.32605	3.09233	2.73861	2.10655	0.829105	2.61006	2.65251
JU071651	53	126	133	107	96	63	290	868	1.82005	2.80626	2.88314	2.58601	2.44949	1.98425	4.25736	2.6838
JU071642	57	163	195	187	154	73	34	863	1.88744	3.19179	3.49106	3.41869	3.10241	2.13593	1.45771	2.66929
JU063248	0	47	47	29	37	372	288	820	0	1.7139	1.71392	1.34628	1.52071	4.82167	4.24262	2.19416
JU063064	0	34	733	2	4	3	19	795	0	1.45776	6.7685	0.353512	0.499937	0.433035	1.08981	1.51465
JU071586	140	174	133	172	89	36	41	785	2.95802	3.29773	2.88314	3.27871	2.35851	1.49995	1.6008	2.55384
JU071718	0	84	28	48	56	230	338	784	0	2.29127	1.3229	1.73207	1.87082	3.7913	4.59618	2.22922
JU071604	183	79	134	121	49	51	161	778	3.38244	2.21987	2.89236	2.7452	1.75664	1.78727	3.17042	2.56489
JU062711	0	6	5	2	0	13	746	772	0	0.612343	0.55907	0.353512	0	0.901365	6.82826	1.32208
JU063868	0	80	146	136	61	78	255	756	0	2.23609	3.02075	2.91546	1.95255	2.20786	3.99216	2.33212
JU071571	0	87	50	25	39	307	227	735	0	2.33185	1.76779	1.25001	1.56125	4.3802	3.76665	2.15111
JU062707	34	179	155	172	114	18	57	729	1.45772	3.34477	3.11248	3.27871	2.66927	1.06063	1.88749	2.40158
JU064610	294	130	95	59	60	29	28	695	4.28661	2.85042	2.43672	1.92031	1.9365	1.34623	1.32292	2.29996
JU070507	0	34	22	18	30	72	474	650	0	1.45776	1.1726	1.06063	1.36929	2.12125	5.44288	1.80349
JU065561	8	2	608	2	2	8	17	647	0.707048	0.353438	6.16441	0.353512	0.353509	0.707099	1.03076	1.3814
JU068166	133	96	124	154	75	21	36	639	2.88314	2.4495	2.78387	3.10242	2.16506	1.14562	1.50005	2.28995
JU068929	0	85	219	261	26	12	25	628	0	2.3049	3.69966	4.03887	1.27476	0.866016	1.25	1.91917
JU066089	0	5	0	3	6	8	599	621	0	0.559022	0	0.432962	0.612409	0.707099	6.11861	1.2043
JU071614	65	83	160	107	39	41	109	604	2.01559	2.2776	3.16229	2.58601	1.56125	1.60073	2.61006	2.25908
JU062725	245	128	84	87	31	1	1	577	3.91313	2.82843	2.29128	2.33186	1.39194	0.249951	0.249796	1.89377
JU071663	355	84	40	51	18	0	28	576	4.71037	2.29127	1.58112	1.78536	1.06066	0	1.32292	1.82167
JU063676	2	58	96	70	56	91	181	554	0.35361	1.90393	2.44951	2.09163	1.87082	2.38477	3.36343	2.05967
JU062742	54	94	102	106	61	27	109	553	1.83715	2.42383	2.52486	2.5739	1.95255	1.299	2.61006	2.17448
JU063249	0	44	27	21	43	131	268	534	0	1.65834	1.29906	1.14568	1.63934	2.86129	4.0927	1.81377
scaffold118	75	137	81	103	61	25	40	522	2.16507	2.92618	2.24998	2.53723	1.95255	1.24994	1.58119	2.09459
JU071669	0	20	9	10	11	82	387	519	0	1.11804	0.75007	0.790597	0.829178	2.26377	4.91807	1.52425
JU062819	0	14	3	9	18	98	365	507	0	0.935444	0.433053	0.750039	1.06066	2.47478	4.77625	1.49003
JU062709	0	7	4	4	14	6	457	492	0	0.66138	0.500047	0.499942	0.935446	0.612328	5.34439	1.22193
JU063888	30	60	87	109	34	37	135	492	1.36935	1.93651	2.33184	2.61006	1.45775	1.52064	2.9047	2.01869
JU071568	11	82	188	153	29	27	0	490	0.829143	2.26385	3.42781	3.09234	1.3463	1.299	0	1.75121
JU066903	0	5	1	3	2	5	465	481	0	0.559022	0.250023	0.432962	0.353509	0.55899	5.39097	1.07792
JU062704	81	91	71	109	52	14	37	455	2.24998	2.38486	2.10655	2.61006	1.80278	0.935379	1.5207	1.94433
JU062793	68	105	104	89	59	16	14	455	2.06153	2.56172	2.5495	2.3585	1.92028	0.999989	0.93533	1.91241
JU063378	28	38	285	11	10	11	67	450	1.3229	1.54108	4.22049	0.829174	0.790558	0.829105	2.04632	1.65423
JU062872	355	29	21	22	9	2	10	448	4.71037	1.34632	1.14564	1.17263	0.750045	0.353484	0.79046	1.46699
JU071596	7	47	69	77	49	23	172	444	0.66136	1.7139	2.07667	2.19375	1.75	1.19892	3.27869	1.83904
JU063621	0	96	86	68	59	99	30	438	0	2.4495	2.3184	2.06154	1.92028	2.48739	1.36927	1.80091
JU063624	0	69	119	53	72	58	63	434	0	2.07663	2.7272	1.82002	2.12132	1.90389	1.9843	1.80476
JU062908	0	67	117	133	24	43	49	433	0	2.04633	2.70418	2.88313	1.22476	1.63929	1.75002	1.74968
JU063088	0	3	429	0	0	0	0	432	0	0.433113	5.17807	0	0	0	0	0.801597
JU062685	0	3	0	2	0	1	425	431	0	0.433113	0	0.353512	0	0.249951	5.15387	0.884349
JU065255	34	80	96	80	49	18	66	423	1.45772	2.23609	2.44951	2.23606	1.75	1.06063	2.03102	1.88872
JU071702	34	77	56	65	51	31	105	419	1.45772	2.19374	1.8708	2.01557	1.78535	1.3919	2.56171	1.89668
JU063942	0	92	114	73	62	71	6	418	0	2.39792	2.66928	2.13602	1.9685	2.10648	0.612218	1.69863
JU063625	19	70	110	68	69	48	30	414	1.08968	2.09167	2.62202	2.06154	2.07665	1.73201	1.36927	1.86326
JU066557	0	13	18	23	58	90	210	412	0	0.901441	1.06064	1.19898	1.90396	2.37163	3.62287	1.57993
contig7500	218	59	45	37	37	3	9	408	3.69121	1.92031	1.67706	1.5207	1.52071	0.433035	0.749953	1.64471
scaffold1	3	12	346	1	1	3	35	401	0.433082	0.865984	4.65026	0.249971	0.250109	0.433035	1.47896	1.19449
JU064935	102	75	59	58	42	15	38	389	2.5249	2.16508	1.92027	1.90392	1.6202	0.968199	1.54108	1.80623
JU062747	8	60	71	41	70	45	92	387	0.707048	1.93651	2.10655	1.60077	2.09165	1.677	2.3979	1.7882
JU071391	0	42	10	11	31	119	169	382	0	1.62017	0.790644	0.829174	1.39194	2.72708	3.25002	1.51558
JU062817	365	4	2	3	0	0	0	374	4.77625	0.500046	0.353587	0.432962	0	0	0	0.86612
JU065710	137	52	65	45	31	16	20	366	2.92619	1.80277	2.01556	1.67703	1.39194	0.999989	1.11807	1.70451
JU063947	51	55	59	56	34	33	76	364	1.78449	1.85879	1.92334	1.87314	1.44756	1.42746	2.18331	1.78544
JU065678	24	30	45	22	27	11	190	349	1.22474	1.36932	1.67706	1.17263	1.29906	0.829105	3.44603	1.57399
scaffold594	0	11	1	3	17	17	298	347	0	0.829138	0.250023	0.432962	1.03075	1.03075	4.31568	1.12704
JU071623	32	41	75	55	20	72	49	344	1.41418	1.60078	2.16509	1.85404	1.11802	2.12125	1.75002	1.71763
JU064123	51	25	93	72	30	13	58	342	1.78537	1.25001	2.41093	2.12134	1.36929	0.901365	1.90395	1.67746
JU064057	0	36	50	50	15	50	140	341	0	1.5	1.76779	1.76778	0.968232	1.76771	2.95806	1.53279
JU069787	0	37	131	110	24	33	0	335	0	1.52068	2.86138	2.62201	1.22476	1.43608	0	1.3807
JU062796	0	3	2	1	7	3	318	334	0	0.433113	0.353587	0.249971	0.661407	0.433035	4.45816	0.941325
JU067035	0	3	0	0	2	0	314	319	0	0.433113	0	0	0.353509	0	4.43003	0.745236
JU063036	0	91	57	25	60	20	66	319	0	2.38486	1.88743	1.25001	1.9365	1.11798	2.03102	1.5154
JU066757	0	0	0	0	0	1	309	310	0	0	0	0	0	0.249951	4.39458	0.663505
JU062832	56	35	61	41	40	18	56	307	1.8708	1.47903	1.95255	1.60077	1.58116	1.06063	1.87077	1.63082
JU063011	0	16	22	30	16	141	81	306	0	0.999987	1.1726	1.36929	1.00001	2.96849	2.24995	1.39433
JU063615	4	23	14	33	6	15	209	304	0.50008	1.19892	0.935365	1.43617	0.612409	0.968199	3.61419	1.32362
JU071283	0	32	106	129	8	10	17	302	0	1.4142	2.5739	2.83946	0.707116	0.790531	1.03076	1.33657
JU063589	1	19	74	49	21	55	82	301	0.25004	1.08975	2.1506	1.75001	1.14565	1.85399	2.26387	1.50056
JU062670	0	60	93	56	42	34	16	301	0	1.93651	2.41093	1.87081	1.6202	1.45767	1.00003	1.47088
JU062764	167	37	39	19	25	0	12	299	3.2307	1.52068	1.56123	1.08969	1.24998	0	0.866053	1.35976
JU062914	0	41	100	100	13	9	35	298	0	1.60078	2.49998	2.50001	0.90139	0.749976	1.47896	1.39016
JU062698	91	68	46	43	11	17	21	297	2.38482	2.06154	1.69559	1.63934	0.829178	1.03075	1.14563	1.54098
JU071674	0	49	67	64	54	47	11	292	0	1.75003	2.04634	2	1.83711	1.71385	0.829246	1.4538
scaffold101	7	53	58	41	34	9	88	290	0.66136	1.82001	1.90392	1.60077	1.45775	0.749976	2.34519	1.50557
JU071626	24	98	68	48	31	11	6	286	1.22474	2.47487	2.06156	1.73207	1.39194	0.829105	0.612218	1.47521
JU071740	44	88	61	52	25	8	4	282	1.65829	2.3452	1.95255	1.80278	1.24998	0.707099	0.500016	1.45942
JU071592	25	42	19	31	20	21	123	281	1.25001	1.62017	1.08971	1.39192	1.11802	1.14562	2.77266	1.48402
JU062752	49	67	37	71	23	6	27	280	1.75	2.04633	1.52066	2.10652	1.19895	0.612328	1.29896	1.50482
JU071729	0	32	64	79	29	46	28	278	0	1.4142	2	2.22205	1.3463	1.69552	1.32292	1.42871
JU071647	0	6	0	0	0	1	266	273	0	0.612343	0	0	0	0.249951	4.07738	0.705667
JU071630	0	7	2	0	8	0	254	271	0	0.66138	0.353587	0	0.707116	0	3.98434	0.815203
JU062890	0	18	14	3	8	99	128	270	0	1.06071	0.935365	0.432962	0.707116	2.48739	2.82844	1.20743
JU066569	0	7	4	8	5	100	145	269	0	0.66138	0.500047	0.707159	0.559009	2.49992	3.01041	1.13399
JU064174	1	33	34	31	39	6	114	258	0.25004	1.43611	1.4577	1.39192	1.56125	0.612328	2.66923	1.3398
JU062738	0	47	45	29	32	53	49	255	0	1.7139	1.67706	1.34628	1.41423	1.81998	1.75002	1.38878
JU062790	40	46	31	32	81	8	16	254	1.58116	1.69028	1.39198	1.41418	2.24836	0.707099	1.00003	1.4333
JU071575	137	31	27	18	16	3	18	250	2.92619	1.39194	1.29906	1.06063	1.00001	0.433035	1.06059	1.31021
JU062789	41	55	43	46	39	14	10	248	1.60081	1.85406	1.63936	1.69561	1.56125	0.935379	0.79046	1.43956
JU062705	0	30	62	66	25	23	42	248	0	1.36932	1.96849	2.03101	1.24998	1.19892	1.62017	1.34827
JU063065	0	10	14	7	11	52	148	242	0	0.790576	0.935365	0.661504	0.829178	1.8027	3.04141	1.15153
JU063719	90	35	46	47	18	4	0	240	2.37173	1.47903	1.69559	1.71394	1.06066	0.499995	0	1.26013
JU071687	0	29	2	5	6	45	149	236	0	1.34632	0.353587	0.558952	0.612409	1.677	3.05165	1.0857
JU063899	29	66	37	69	16	5	13	235	1.34633	2.03102	1.52066	2.07664	1.00001	0.55899	0.901357	1.34786
JU062710	17	6	24	35	14	5	133	234	1.03082	0.612343	1.22475	1.47904	0.935446	0.55899	2.88314	1.24636
JU065613	5	9	37	48	15	30	87	231	0.559107	0.750034	1.52066	1.73207	0.968232	1.36927	2.33185	1.31875
JU071662	0	54	22	15	64	34	41	230	0	1.83714	1.1726	0.968231	1.99999	1.45767	1.6008	1.29092
JU071610	8	29	46	10	26	8	101	228	0.707048	1.34632	1.69559	0.790597	1.27476	0.707099	2.51244	1.29055
JU068504	182	20	3	15	5	1	0	226	3.37268	1.11804	0.433053	0.968231	0.559009	0.249951	0	0.957282
JU062800	0	23	47	10	63	30	52	225	0	1.19892	1.71392	0.790597	1.98433	1.36927	1.80283	1.2657
JU062885	0	36	69	63	37	18	0	223	0	1.5	2.07667	1.98432	1.52071	1.06063	0	1.16319
JU062855	6	17	30	20	21	5	122	221	0.612471	1.03074	1.36934	1.11807	1.14565	0.55899	2.76131	1.22808
JU063922	42	13	37	31	15	19	63	220	1.62022	0.901441	1.52066	1.39192	0.968232	1.08968	1.9843	1.35378
contig2750	72	45	17	41	37	3	3	218	2.12132	1.67706	1.03075	1.60077	1.52071	0.433035	0.433149	1.25954
JU071581	2	9	35	18	12	35	104	215	0.35361	0.750034	1.47899	1.06063	0.865997	1.47898	2.54951	1.21968
JU064216	45	18	19	17	7	6	100	212	1.67703	1.06071	1.08971	1.03075	0.661407	0.612328	2.49999	1.23313
JU063025	0	3	4	3	0	1	197	208	0	0.433113	0.500047	0.432962	0	0.249951	3.50889	0.732138
JU063684	10	38	45	27	36	24	28	208	0.790542	1.54108	1.67706	1.29903	1.5	1.22469	1.32292	1.33647
JU071650	5	41	40	45	30	13	32	206	0.559107	1.60078	1.58112	1.67703	1.36929	0.901365	1.41426	1.30042
JU064491	11	38	13	13	40	9	81	205	0.829143	1.54108	0.90133	0.901388	1.58116	0.749976	2.24995	1.25058
JU064178	137	16	17	11	6	0	17	204	2.92619	0.999987	1.03075	0.829174	0.612409	0	1.03076	1.06132
JU065909	32	55	60	18	28	1	8	202	1.41418	1.85406	1.93647	1.06063	1.32287	0.249951	0.707129	1.22076
JU062879	113	27	20	19	7	4	11	201	2.65755	1.29902	1.11802	1.08969	0.661407	0.499995	0.829246	1.16499
JU064492	6	32	48	40	16	15	43	200	0.612471	1.4142	1.73207	1.58114	1.00001	0.968199	1.63931	1.2782
JU064374	46	41	36	43	18	0	16	200	1.69557	1.60078	1.49997	1.63934	1.06066	0	1.00003	1.21376
JU062693	2	29	45	43	39	16	23	197	0.35361	1.34632	1.67706	1.63934	1.56125	0.999989	1.19904	1.2538
JU065612	16	19	24	13	17	26	82	197	1.00004	1.08975	1.22475	0.901388	1.03075	1.27472	2.26387	1.25504
JU063420	159	8	2	13	11	0	2	195	3.15238	0.707172	0.353587	0.901388	0.829178	0	0.353264	0.899568
JU063017	0	34	45	45	31	36	4	195	0	1.45776	1.67706	1.67703	1.39194	1.49995	0.500016	1.17196
JU062903	0	6	1	0	0	4	183	194	0	0.612343	0.250023	0	0	0.499995	3.38193	0.677757
JU071653	106	10	23	9	12	5	29	194	2.5739	0.790576	1.19896	0.750039	0.865997	0.55899	1.34629	1.15496
JU066605	0	0	0	1	0	0	192	193	0	0	0	0.249971	0	0	3.46409	0.53058
JU062775	0	37	64	41	29	16	5	192	0	1.52068	2	1.60077	1.3463	0.999989	0.55894	1.14667
JU071632	0	26	54	35	36	16	23	190	0	1.27475	1.83715	1.47904	1.5	0.999989	1.19904	1.18428
JU070941	0	52	49	51	15	22	1	190	0	1.80277	1.75002	1.78536	0.968232	1.17257	0.249796	1.10411
JU071595	78	27	29	27	13	3	12	189	2.20796	1.29902	1.34632	1.29903	0.90139	0.433035	0.866053	1.19326
JU064606	6	21	39	44	27	11	40	188	0.612471	1.14563	1.56123	1.65829	1.29906	0.829105	1.58119	1.241
JU069424	92	15	27	45	4	2	3	188	2.39789	0.968254	1.29906	1.67703	0.499937	0.353484	0.433149	1.08983
JU071607	14	19	14	23	11	24	82	187	0.935434	1.08975	0.935365	1.19898	0.829178	1.22469	2.26387	1.21104
JU062827	0	31	74	54	14	7	4	184	0	1.39194	2.1506	1.83711	0.935446	0.661448	0.500016	1.06808
scaffold508	0	1	172	0	2	2	7	184	0	0.249918	3.27871	0	0.353509	0.353484	0.661539	0.699595
JU063449	0	21	6	15	17	69	56	184	0	1.14563	0.61243	0.968231	1.03075	2.07658	1.87077	1.10063
JU063686	0	37	56	22	31	26	11	183	0	1.52068	1.8708	1.17263	1.39194	1.27472	0.829246	1.15143
JU065967	80	18	24	23	9	11	14	179	2.23605	1.06071	1.22475	1.19898	0.750045	0.829105	0.93533	1.17642
JU069805	176	1	1	1	0	0	0	179	3.31661	0.249918	0.250023	0.249971	0	0	0	0.580931
JU063276	0	0	1	0	0	3	173	177	0	0	0.250023	0	0	0.433035	3.28826	0.567331
JU062911	19	56	30	34	11	15	9	174	1.08968	1.87083	1.36934	1.45776	0.829178	0.968199	0.749953	1.19071
JU071634	5	20	17	24	11	12	85	174	0.559107	1.11804	1.03075	1.22476	0.829178	0.866016	2.30484	1.13324
contig6337	4	34	40	29	20	17	25	169	0.50008	1.45776	1.58112	1.34628	1.11802	1.03075	1.25	1.18343
JU062905	0	1	0	0	0	1	166	168	0	0.249918	0	0	0	0.249951	3.22103	0.531557
JU071751	0	27	8	2	53	15	63	168	0	1.29902	0.707173	0.353512	1.82001	0.968199	1.9843	1.01889
JU069013	0	21	27	61	20	12	25	166	0	1.14563	1.29906	1.95258	1.11802	0.866016	1.25	1.09019
JU064245	0	0	2	0	2	0	161	165	0	0	0.353587	0	0.353509	0	3.17216	0.554179
JU063792	7	22	47	25	5	3	56	165	0.66136	1.17258	1.71392	1.25001	0.559009	0.433035	1.87077	1.09438
JU062866	76	14	17	17	14	4	22	164	2.17946	0.935444	1.03075	1.03075	0.935446	0.499995	1.17255	1.11206
JU063623	0	24	26	16	26	16	56	164	0	1.22477	1.27477	0.999979	1.27476	0.999989	1.87077	1.09215
contig3751	146	3	7	4	0	0	0	160	3.02076	0.433113	0.6615	0.499942	0	0	0	0.659331
JU062751	104	6	3	4	5	0	38	160	2.54949	0.612343	0.433053	0.499942	0.559009	0	1.54108	0.884989
JU063191	0	11	5	3	15	4	120	158	0	0.829138	0.55907	0.432962	0.968232	0.499995	2.73862	0.861145
JU064781	0	8	3	0	8	0	139	158	0	0.707172	0.433053	0	0.707116	0	2.94742	0.684966
JU062942	0	33	60	37	18	8	2	158	0	1.43611	1.93647	1.5207	1.06066	0.707099	0.353264	1.00204
JU062895	0	38	10	3	60	31	14	156	0	1.54108	0.790644	0.432962	1.9365	1.3919	0.93533	1.00406
JU066073	0	26	33	29	28	15	25	156	0	1.27475	1.4361	1.34628	1.32287	0.968199	1.25	1.08545
JU062935	24	56	28	27	6	3	11	155	1.22474	1.87083	1.3229	1.29903	0.612409	0.433035	0.829246	1.0846
JU065332	7	13	14	11	16	17	77	155	0.66136	0.901441	0.935365	0.829174	1.00001	1.03075	2.19379	1.07884
JU063743	84	18	18	14	10	2	8	154	2.29128	1.06071	1.06064	0.935407	0.790558	0.353484	0.707129	1.02846
JU071684	0	27	45	31	24	18	9	154	0	1.29902	1.67706	1.39192	1.22476	1.06063	0.749953	1.05762
JU064147	22	19	44	12	10	10	36	153	1.17258	1.08975	1.65831	0.866034	0.790558	0.790531	1.50005	1.12397
JU071736	97	25	9	18	3	0	0	152	2.46221	1.25001	0.75007	1.06063	0.433039	0	0	0.850851
JU064249	0	18	13	17	16	11	77	152	0	1.06071	0.90133	1.03075	1.00001	0.829105	2.19379	1.00224
JU062748	1	15	17	12	14	26	67	152	0.25004	0.968254	1.03075	0.866034	0.935446	1.27472	2.04632	1.05308
JU066045	45	13	14	7	11	4	55	149	1.67703	0.901441	0.935365	0.661504	0.829178	0.499995	1.85402	1.05122
JU071576	20	16	27	13	20	10	41	147	1.118	1.00965	1.30597	0.897072	1.10591	0.777984	1.59854	1.11616
JU068226	0	5	3	2	4	2	129	145	0	0.559022	0.433053	0.353512	0.499937	0.353484	2.83945	0.71978
JU064068	0	4	12	4	6	8	110	144	0	0.500046	0.865958	0.499942	0.612409	0.707099	2.62198	0.829634
JU062754	6	16	45	46	12	6	11	142	0.612471	0.999987	1.67706	1.69561	0.865997	0.612328	0.829246	1.04181
JU064102	18	21	29	16	35	14	9	142	1.06072	1.14563	1.34632	0.999979	1.479	0.935379	0.749953	1.10243
JU063746	1	5	13	17	4	1	101	142	0.25004	0.559022	0.90133	1.03075	0.499937	0.249951	2.51244	0.857639
JU062956	0	0	6	2	0	1	132	141	0	0	0.61243	0.353512	0	0.249951	2.8723	0.584027
JU063184	0	0	0	0	0	0	141	141	0	0	0	0	0	0	2.96859	0.424084
JU063689	12	14	11	12	18	14	60	141	0.866024	0.935444	0.829079	0.866034	1.06066	0.935379	1.93644	1.06129
JU065431	1	17	25	39	29	18	11	140	0.25004	1.03074	1.25001	1.56125	1.3463	1.06063	0.829246	1.04689
JU062842	54	24	15	18	15	6	7	139	1.83715	1.22477	0.968204	1.06063	0.968232	0.612328	0.661539	1.04755
JU071580	9	20	17	17	16	22	38	139	0.749958	1.11804	1.03075	1.03075	1.00001	1.17257	1.54108	1.09188
JU062851	12	19	10	4	11	10	71	137	0.866024	1.08975	0.790644	0.499942	0.829178	0.790531	2.10653	0.996086
JU063277	0	0	0	0	0	3	134	137	0	0	0	0	0	0.433035	2.89394	0.475282
JU071608	5	24	20	24	19	6	38	136	0.559107	1.22477	1.11802	1.22476	1.08975	0.612328	1.54108	1.05283
JU063973	0	11	7	3	6	18	91	136	0	0.829138	0.6615	0.432962	0.612409	1.06063	2.38486	0.854499
JU066094	73	21	9	11	12	2	7	135	2.136	1.14563	0.75007	0.829174	0.865997	0.353484	0.661539	0.963129
JU065228	30	29	35	23	10	4	3	134	1.36935	1.34632	1.47899	1.19898	0.790558	0.499995	0.433149	1.01676
JU065937	0	5	4	2	20	61	42	134	0	0.559022	0.500047	0.353512	1.11802	1.95249	1.62017	0.871894
JU071601	18	17	14	8	13	5	56	131	1.06072	1.03074	0.935365	0.707159	0.90139	0.55899	1.87077	1.00931
JU071666	0	4	7	6	10	11	92	130	0	0.500046	0.6615	0.612301	0.790558	0.829105	2.3979	0.827345
JU065605	102	10	6	5	6	0	0	129	2.5249	0.790576	0.61243	0.558952	0.612409	0	0	0.728466
JU064591	4	17	31	32	17	13	15	129	0.50008	1.03074	1.39198	1.41418	1.03075	0.901365	0.968331	1.03392
JU071700	0	0	0	0	0	0	129	129	0	0	0	0	0	0	2.83945	0.405636
JU062837	16	56	23	16	8	4	5	128	1.00004	1.87083	1.19896	0.999979	0.707116	0.499995	0.55894	0.976552
JU065045	60	16	3	2	7	16	23	127	1.93649	0.999987	0.433053	0.353512	0.661407	0.999989	1.19904	0.940497
JU062893	24	21	23	21	9	3	26	127	1.22474	1.14563	1.19896	1.14568	0.750045	0.433035	1.27471	1.02469
JU062950	0	23	24	40	24	7	9	127	0	1.19892	1.22475	1.58114	1.22476	0.661448	0.749953	0.94871
JU071668	10	24	22	12	14	4	40	126	0.790542	1.22477	1.1726	0.866034	0.935446	0.499995	1.58119	1.01008
JU071561	100	12	3	4	4	1	2	126	2.50001	0.865984	0.433053	0.499942	0.499937	0.249951	0.353264	0.771735
JU071679	0	34	39	34	9	8	1	125	0	1.45776	1.56123	1.45776	0.750045	0.707099	0.249796	0.883386
JU063871	3	21	20	26	23	20	12	125	0.433082	1.14563	1.11802	1.27476	1.19895	1.11798	0.866053	1.02207
JU066135	8	11	16	29	7	7	47	125	0.707048	0.829138	0.999965	1.34628	0.661407	0.661448	1.71387	0.988451
JU062828	1	30	21	23	11	10	28	124	0.25004	1.36932	1.14564	1.19898	0.829178	0.790531	1.32292	0.986657
JU064739	2	13	28	30	18	15	18	124	0.35361	0.901441	1.3229	1.36929	1.06066	0.968199	1.06059	1.00524
JU067895	20	7	20	22	9	8	38	124	1.118	0.66138	1.11802	1.17263	0.750045	0.707099	1.54108	1.00975
JU071584	0	10	11	0	14	39	49	123	0	0.790576	0.829079	0	0.935446	1.56121	1.75002	0.838048
JU069247	78	7	10	25	2	0	0	122	2.20796	0.66138	0.790644	1.25001	0.353509	0	0	0.751929
JU063858	22	19	23	16	12	1	29	122	1.17258	1.08975	1.19896	0.999979	0.865997	0.249951	1.34629	0.989074
JU062907	0	13	38	53	9	7	1	121	0	0.901441	1.54108	1.82002	0.750045	0.661448	0.249796	0.846262
JU064001	13	5	19	8	19	27	30	121	0.901398	0.559022	1.08971	0.707159	1.08975	1.299	1.36927	1.00219
JU062857	57	9	17	8	14	2	13	120	1.88744	0.750034	1.03075	0.707159	0.935446	0.353484	0.901357	0.937953
JU064488	16	8	11	17	11	4	52	119	1.00004	0.707172	0.829079	1.03075	0.829178	0.499995	1.80283	0.957006
JU063831	14	27	15	12	12	3	36	119	0.935434	1.29902	0.968204	0.866034	0.865997	0.433035	1.50005	0.98111
JU071646	0	29	33	14	20	3	20	119	0	1.34632	1.4361	0.935407	1.11802	0.433035	1.11807	0.91242
JU071659	10	25	28	4	13	10	28	118	0.790542	1.25001	1.3229	0.499942	0.90139	0.790531	1.32292	0.982605
JU064307	58	23	14	9	13	0	1	118	1.90393	1.19892	0.935365	0.750039	0.90139	0	0.249796	0.848491
contig5709	82	7	7	12	4	4	1	117	2.26383	0.66138	0.6615	0.866034	0.499937	0.499995	0.249796	0.814639
JU064909	16	9	13	10	7	9	52	116	1.00004	0.750034	0.90133	0.790597	0.661407	0.749976	1.80283	0.950888
JU064116	12	10	19	7	5	5	57	115	0.866024	0.790576	1.08971	0.661504	0.559009	0.55899	1.88749	0.916186
JU069916	0	1	1	0	0	0	113	115	0	0.249918	0.250023	0	0	0	2.65752	0.451066
JU062941	0	13	9	10	25	24	33	114	0	0.901441	0.75007	0.790597	1.24998	1.22469	1.43615	0.907562
JU062865	32	8	16	13	4	6	35	114	1.41418	0.707172	0.999965	0.901388	0.499937	0.612328	1.47896	0.944847
JU070099	0	3	25	42	3	11	29	113	0	0.433113	1.25001	1.62017	0.433039	0.829105	1.34629	0.844534
JU064684	21	23	28	17	16	1	7	113	1.14562	1.19892	1.3229	1.03075	1.00001	0.249951	0.661539	0.944241
JU064207	2	23	17	22	15	5	29	113	0.35361	1.19892	1.03075	1.17263	0.968232	0.55899	1.34629	0.94706
JU064349	0	14	31	26	12	10	19	112	0	0.935444	1.39198	1.27476	0.865997	0.790531	1.08981	0.906931
JU062861	0	2	1	11	0	0	98	112	0	0.353438	0.250023	0.829174	0	0	2.47491	0.558221
JU062830	0	1	0	0	0	0	111	112	0	0.249918	0	0	0	0	2.63394	0.411979
scaffold505	20	54	15	9	5	3	6	112	1.118	1.83714	0.968204	0.750039	0.559009	0.433035	0.612218	0.896806
JU064429	1	9	13	15	15	16	43	112	0.25004	0.750034	0.90133	0.968231	0.968232	0.999989	1.63931	0.92531
JU065538	1	0	2	2	0	12	94	111	0.25004	0	0.353587	0.353512	0	0.866016	2.42387	0.606718
JU062708	0	19	23	19	22	13	15	111	0	1.08975	1.19896	1.08969	1.17257	0.901365	0.968331	0.917239
JU062699	13	41	13	14	15	4	11	111	0.901398	1.60078	0.90133	0.935407	0.968232	0.499995	0.829246	0.948055
JU071605	31	10	18	5	6	6	35	111	1.3919	0.790576	1.06064	0.558952	0.612409	0.612328	1.47896	0.929395
JU062852	4	27	23	24	6	4	22	110	0.50008	1.29902	1.19896	1.22476	0.612409	0.499995	1.17255	0.929682
contig1565	5	25	19	28	12	11	9	109	0.559107	1.25001	1.08971	1.32287	0.865997	0.829105	0.749953	0.952392
JU063405	2	10	8	13	7	5	63	108	0.35361	0.790576	0.707173	0.901388	0.661407	0.55899	1.9843	0.851063
JU062805	33	10	8	31	6	3	17	108	1.43612	0.790576	0.707173	1.39192	0.612409	0.433035	1.03076	0.914569
JU064716	1	18	14	13	12	13	36	107	0.25004	1.06071	0.935365	0.901388	0.865997	0.901365	1.50005	0.916416
JU063571	28	8	13	33	10	7	7	106	1.3229	0.707172	0.90133	1.43617	0.790558	0.661448	0.661539	0.925875
JU063828	77	15	3	5	3	0	3	106	2.19376	0.968254	0.433053	0.558952	0.433039	0	0.433149	0.717173
JU063050	0	35	0	4	25	7	35	106	0	1.47903	0	0.499942	1.24998	0.661448	1.47896	0.767052
JU063294	34	22	22	14	6	2	6	106	1.45772	1.17258	1.1726	0.935407	0.612409	0.353484	0.612218	0.902346
JU062920	0	10	25	27	3	7	32	104	0	0.790576	1.25001	1.29903	0.433039	0.661448	1.41426	0.835481
JU063643	6	4	14	30	6	12	32	104	0.612471	0.500046	0.935365	1.36929	0.612409	0.866016	1.41426	0.901407
JU064904	16	6	6	14	14	5	43	104	1.00004	0.612343	0.61243	0.935407	0.935446	0.55899	1.63931	0.899138
JU071562	0	13	28	55	5	2	1	104	0	0.901441	1.3229	1.85404	0.559009	0.353484	0.249796	0.748667
JU062681	0	14	8	2	3	22	55	104	0	0.935444	0.707173	0.353512	0.433039	1.17257	1.85402	0.779395
JU063956	1	14	14	8	15	7	44	103	0.25004	0.935444	0.935365	0.707159	0.968232	0.661448	1.65836	0.873722
JU062840	7	11	22	5	11	12	35	103	0.66136	0.829138	1.1726	0.558952	0.829178	0.866016	1.47896	0.913744
JU064125	13	11	18	13	13	2	32	102	0.901398	0.829138	1.06064	0.901388	0.90139	0.353484	1.41426	0.908814
JU063251	39	8	12	13	12	6	12	102	1.56127	0.707172	0.865958	0.901388	0.865997	0.612328	0.866053	0.911452
JU069831	0	18	12	2	22	23	24	101	0	1.06071	0.865958	0.353512	1.17257	1.19892	1.22478	0.839493
JU063908	27	19	16	7	21	7	3	100	1.29906	1.08975	0.999965	0.661504	1.14565	0.661448	0.433149	0.898647
JU064471	3	6	9	5	4	7	66	100	0.433082	0.612343	0.75007	0.558952	0.499937	0.661448	2.03102	0.792408
JU062750	36	9	16	8	15	6	10	100	1.5	0.750034	0.999965	0.707159	0.968232	0.612328	0.79046	0.904025
JU063829	7	14	4	3	6	4	61	99	0.66136	0.935444	0.500047	0.432962	0.612409	0.499995	1.9526	0.799259
JU065263	1	15	11	15	8	6	43	99	0.25004	0.968254	0.829079	0.968231	0.707116	0.612328	1.63931	0.85348
JU064818	14	15	17	6	4	2	40	98	0.935434	0.968254	1.03075	0.612301	0.499937	0.353484	1.58119	0.854478
JU068158	0	1	1	0	3	0	93	98	0	0.249918	0.250023	0	0.433039	0	2.41088	0.477694
JU063067	46	17	15	14	5	1	0	98	1.69557	1.03074	0.968204	0.935407	0.559009	0.233832	0	0.774681
JU065434	3	17	15	11	7	17	28	98	0.409702	1.03721	0.954288	0.831341	0.682386	1.02284	1.32083	0.894086
JU063711	0	14	21	8	20	5	29	97	0	0.935444	1.14564	0.707159	1.11802	0.55899	1.34629	0.830221
JU062802	2	3	35	0	8	3	46	97	0.35361	0.433113	1.47899	0	0.707116	0.433035	1.69557	0.728776
JU063986	6	13	15	7	19	6	31	97	0.612471	0.901441	0.968204	0.661504	1.08975	0.612328	1.39187	0.891081
JU065483	84	9	1	1	2	0	0	97	2.29128	0.750034	0.250023	0.249971	0.353509	0	0	0.556403
JU064807	10	25	18	17	10	3	13	96	0.790542	1.25001	1.06064	1.03075	0.790558	0.433035	0.901357	0.893841
JU071755	30	16	11	17	11	2	9	96	1.36935	0.999987	0.829079	1.03075	0.829178	0.353484	0.749953	0.880254
JU062765	6	20	17	10	27	3	12	95	0.612471	1.11804	1.03075	0.790597	1.29906	0.433035	0.866053	0.878573
JU071677	6	6	5	9	5	2	62	95	0.612471	0.612343	0.55907	0.750039	0.559009	0.353484	1.96851	0.773561
JU063243	0	10	8	1	1	21	54	95	0	0.790576	0.707173	0.249971	0.250109	1.14562	1.83712	0.71151
JU063835	6	12	10	19	5	15	28	95	0.612471	0.865984	0.790644	1.08969	0.559009	0.968199	1.32292	0.886987
JU071220	0	0	0	0	0	0	94	94	0	0	0	0	0	0	2.42387	0.346268
JU064141	6	20	7	8	13	11	28	93	0.612471	1.11804	0.6615	0.707159	0.90139	0.829105	1.32292	0.878941
JU062938	0	0	0	2	0	0	91	93	0	0	0	0.353512	0	0	2.38486	0.391196
JU071183	0	1	1	0	0	0	91	93	0	0.249918	0.250023	0	0	0	2.38486	0.412114
JU065397	11	8	12	14	9	26	13	93	0.829143	0.707172	0.865958	0.935407	0.750045	1.27472	0.901357	0.894829
JU067070	0	0	1	1	0	0	90	92	0	0	0.250023	0.249971	0	0	2.37174	0.410248
JU071633	25	21	20	7	12	1	6	92	1.25001	1.14563	1.11802	0.661504	0.865997	0.249951	0.612218	0.843334
JU062811	58	11	12	5	4	2	0	92	1.90393	0.829138	0.865958	0.558952	0.499937	0.353484	0	0.715914
JU062745	5	8	10	14	11	10	33	91	0.559107	0.707172	0.790644	0.935407	0.829178	0.790531	1.43615	0.864027
JU066238	0	13	31	34	3	8	2	91	0	0.901441	1.39198	1.45776	0.433039	0.707099	0.353264	0.749227
JU071579	11	17	11	5	6	4	37	91	0.829143	1.03074	0.829079	0.558952	0.612409	0.499995	1.5207	0.840147
JU064176	15	10	7	9	4	3	42	90	0.968276	0.790576	0.6615	0.750039	0.499937	0.433035	1.62017	0.817648
JU063979	8	8	4	10	8	6	46	90	0.707048	0.707172	0.500047	0.790597	0.707116	0.612328	1.69557	0.817126
JU071245	0	15	9	11	14	15	26	90	0	0.968254	0.75007	0.829174	0.935446	0.968199	1.27471	0.817979
JU064579	1	13	19	16	9	5	27	90	0.25004	0.901441	1.08971	0.999979	0.750045	0.55899	1.29896	0.835594
JU071631	40	13	7	7	4	6	12	89	1.58116	0.901441	0.6615	0.661504	0.499937	0.612328	0.866053	0.826275
JU071717	21	6	9	4	3	1	45	89	1.14562	0.612343	0.75007	0.499942	0.433039	0.249951	1.67707	0.766862
JU068813	17	12	19	38	2	1	0	89	1.03082	0.865984	1.08971	1.54111	0.353509	0.249951	0	0.733012
JU071567	0	2	0	0	0	0	87	89	0	0.353438	0	0	0	0	2.33185	0.383613
JU071667	0	14	19	19	5	7	25	89	0	0.935444	1.08971	1.08969	0.559009	0.661448	1.25	0.797899
JU062892	43	7	15	12	6	3	3	89	1.63933	0.66138	0.968204	0.866034	0.612409	0.433035	0.433149	0.801934
JU064136	10	36	5	2	6	4	26	89	0.790542	1.5	0.55907	0.353512	0.612409	0.499995	1.27471	0.798605
JU066329	50	7	11	7	7	3	3	88	1.76778	0.66138	0.829079	0.661504	0.661407	0.433035	0.433149	0.77819
JU062836	0	7	21	25	7	4	24	88	0	0.66138	1.14564	1.25001	0.661407	0.499995	1.22478	0.777602
JU064164	23	12	11	5	2	2	33	88	1.19895	0.865984	0.829079	0.558952	0.353509	0.353484	1.43615	0.799443
JU064782	2	22	5	8	7	7	36	87	0.35361	1.17258	0.55907	0.707159	0.661407	0.661448	1.50005	0.802188
JU064212	0	14	26	24	4	8	11	87	0	0.935444	1.27477	1.22476	0.499937	0.707099	0.829246	0.781608
JU062999	0	1	0	0	0	0	86	87	0	0.249918	0	0	0	0	2.31843	0.366907
JU071710	0	1	0	0	0	0	86	87	0	0.249918	0	0	0	0	2.31843	0.366907
JU064041	13	21	19	9	16	1	8	87	0.901398	1.14563	1.08971	0.750039	1.00001	0.249951	0.707129	0.834839
JU062770	1	11	25	5	20	6	19	87	0.25004	0.829138	1.25001	0.558952	1.11802	0.612328	1.08981	0.815471
JU071625	14	18	15	11	10	2	17	87	0.935434	1.06071	0.968204	0.829174	0.790558	0.353484	1.03076	0.852617
JU064025	35	10	5	5	3	3	26	87	1.47901	0.790576	0.55907	0.558952	0.433039	0.433035	1.27471	0.789771
JU066075	35	8	11	28	4	0	1	87	1.47901	0.707172	0.829079	1.32287	0.499937	0	0.249796	0.726837
scaffold515	25	26	14	11	6	2	2	86	1.25001	1.27475	0.935365	0.829174	0.612409	0.353484	0.353264	0.801207
JU062860	2	5	39	3	5	1	31	86	0.35361	0.559022	1.56123	0.432962	0.559009	0.249951	1.39187	0.729665
JU063298	0	5	15	4	10	3	48	85	0	0.559022	0.968204	0.499942	0.790558	0.433035	1.73211	0.711838
JU071691	42	7	4	5	2	5	20	85	1.62022	0.66138	0.500047	0.558952	0.353509	0.55899	1.11807	0.76731
JU062675	0	0	0	0	1	0	84	85	0	0	0	0	0.250109	0	2.29127	0.363054
JU064105	5	9	18	17	5	4	27	85	0.559107	0.750034	1.06064	1.03075	0.559009	0.499995	1.29896	0.822641
JU069689	8	14	12	15	15	13	8	85	0.707048	0.935444	0.865958	0.968231	0.968232	0.901365	0.707129	0.864773
JU062810	15	20	10	14	14	4	7	84	0.968276	1.11804	0.790644	0.935407	0.935446	0.499995	0.661539	0.844193
JU063612	0	0	0	0	0	2	82	84	0	0	0	0	0	0.353484	2.26387	0.373908
JU062741	0	14	14	11	7	2	36	84	0	0.935444	0.935365	0.829174	0.661407	0.353484	1.50005	0.744989
JU062985	0	16	22	33	12	1	0	84	0	0.999987	1.1726	1.43617	0.865997	0.249951	0	0.674959
JU062945	7	6	16	13	4	10	28	84	0.66136	0.612343	0.999965	0.901388	0.499937	0.790531	1.32292	0.82692
JU069838	2	15	8	10	13	7	28	83	0.35361	0.968254	0.707173	0.790597	0.90139	0.661448	1.32292	0.815056
JU071743	0	10	27	21	7	3	15	83	0	0.790576	1.29906	1.14568	0.661407	0.433035	0.968331	0.756869
JU066682	0	19	29	13	16	6	0	83	0	1.08975	1.34632	0.901388	1.00001	0.612328	0	0.707115
JU069775	0	1	0	0	0	0	82	83	0	0.249918	0	0	0	0	2.26387	0.359113
JU062778	3	13	22	6	4	5	30	83	0.433082	0.901441	1.1726	0.612301	0.499937	0.55899	1.36927	0.792518
JU064422	20	16	12	19	10	3	3	83	1.118	0.999987	0.865958	1.08969	0.790558	0.433035	0.433149	0.818624
JU065831	24	8	11	12	4	3	20	82	1.22474	0.707172	0.829079	0.866034	0.499937	0.433035	1.11807	0.811153
JU062984	0	1	2	6	0	7	65	81	0	0.249918	0.353587	0.612301	0	0.661448	2.0156	0.556122
JU063663	2	2	8	19	2	3	45	81	0.35361	0.353438	0.707173	1.08969	0.353509	0.433035	1.67707	0.709646
contig7673	32	11	21	11	2	4	0	81	1.41418	0.829138	1.14564	0.829174	0.353509	0.499995	0	0.72452
JU062841	31	19	11	8	5	2	5	81	1.3919	1.08975	0.829079	0.707159	0.559009	0.353484	0.55894	0.784189
JU062807	3	18	11	14	9	4	21	80	0.433082	1.06071	0.829079	0.935407	0.750045	0.499995	1.14563	0.807707
JU063004	0	15	16	13	6	19	11	80	0	0.968254	0.999965	0.901388	0.612409	1.08968	0.829246	0.771563
JU068682	0	0	0	0	0	1	79	80	0	0	0	0	0	0.249951	2.22205	0.353143
JU067932	0	0	0	1	0	0	78	79	0	0	0	0.249971	0	0	2.20796	0.351133
JU071660	4	4	29	13	5	6	17	78	0.50008	0.500046	1.34632	0.901388	0.559009	0.612328	1.03076	0.778562
JU064089	0	19	20	6	10	16	7	78	0	1.08975	1.11802	0.612301	0.790558	0.999989	0.661539	0.753166
JU063073	20	23	5	16	8	0	6	78	1.118	1.19892	0.55907	0.999979	0.707116	0	0.612218	0.742185
JU064788	52	5	10	4	1	0	5	77	1.8028	0.559022	0.790644	0.499942	0.250109	0	0.55894	0.63735
JU064339	1	9	5	10	6	0	45	76	0.25004	0.750034	0.55907	0.790597	0.612409	0	1.67707	0.662746
JU063000	0	13	34	7	9	12	1	76	0	0.901441	1.4577	0.661504	0.750045	0.866016	0.249796	0.698072
JU063980	11	12	6	5	5	8	29	76	0.829143	0.865984	0.61243	0.558952	0.559009	0.707099	1.34629	0.782702
JU070713	0	0	0	0	0	0	76	76	0	0	0	0	0	0	2.17942	0.311346
JU065536	57	7	4	6	2	0	0	76	1.88744	0.66138	0.500047	0.612301	0.353509	0	0	0.573525
JU062965	0	2	5	10	2	1	56	76	0	0.353438	0.55907	0.790597	0.353509	0.249951	1.87077	0.596763
JU062739	56	8	0	9	2	0	0	75	1.8708	0.707172	0	0.750039	0.353509	0	0	0.525932
JU065577	37	13	11	3	6	1	4	75	1.52069	0.901441	0.829079	0.432962	0.612409	0.249951	0.500016	0.720936
JU066502	7	4	20	5	4	3	32	75	0.66136	0.500046	1.11802	0.558952	0.499937	0.433035	1.41426	0.740802
JU066532	0	5	20	18	20	4	8	75	0	0.559022	1.11802	1.06063	1.11802	0.499995	0.707129	0.723259
JU065482	67	1	3	3	1	0	0	75	2.04631	0.249918	0.433053	0.432962	0.250109	0	0	0.487479
JU062922	14	8	14	4	4	2	29	75	0.935434	0.707172	0.935365	0.499942	0.499937	0.353484	1.34629	0.753947
JU062697	16	23	11	19	6	0	0	75	1.00004	1.19892	0.829079	1.08969	0.612409	0	0	0.675733
JU064617	28	16	11	12	5	2	0	74	1.3229	0.999987	0.829079	0.866034	0.559009	0.353484	0	0.704357
JU069370	0	4	17	24	5	10	14	74	0	0.500046	1.03075	1.22476	0.559009	0.790531	0.93533	0.72006
JU065679	6	5	13	4	4	1	40	73	0.612471	0.559022	0.90133	0.499942	0.499937	0.249951	1.58119	0.700549
JU065207	43	5	8	13	3	1	0	73	1.63933	0.559022	0.707173	0.901388	0.433039	0.249951	0	0.641414
JU065194	0	12	18	16	10	2	15	73	0	0.865984	1.06064	0.999979	0.790558	0.353484	0.968331	0.719853
JU069748	0	20	18	19	13	3	0	73	0	1.11804	1.06064	1.08969	0.90139	0.433035	0	0.657542
JU062676	0	8	15	4	7	6	33	73	0	0.707172	0.968204	0.499942	0.661407	0.612328	1.43615	0.697886
JU062876	0	5	33	13	11	10	1	73	0	0.559022	1.4361	0.901388	0.829178	0.790531	0.249796	0.680859
JU063632	2	4	13	18	2	3	31	73	0.35361	0.500046	0.90133	1.06063	0.353509	0.433035	1.39187	0.713432
JU064214	0	1	2	6	3	26	35	73	0	0.249918	0.353587	0.612301	0.433039	1.27472	1.47896	0.628932
JU064124	0	11	0	0	4	2	56	73	0	0.829138	0	0	0.499937	0.353484	1.87077	0.507619
JU063943	0	14	21	7	14	8	8	72	0	0.935444	1.14564	0.661504	0.935446	0.707099	0.707129	0.727466
JU067668	0	16	7	32	11	2	4	72	0	0.999987	0.6615	1.41418	0.829178	0.353484	0.500016	0.679764
JU062784	0	13	20	20	8	5	6	72	0	0.901441	1.11802	1.11807	0.707116	0.55899	0.612218	0.716552
JU065415	11	11	18	11	9	2	10	72	0.829143	0.829138	1.06064	0.829174	0.750045	0.353484	0.79046	0.77744
JU063300	32	18	7	6	5	0	3	71	1.41418	1.06071	0.6615	0.612301	0.559009	0	0.433149	0.677264
JU063196	0	0	0	0	0	0	71	71	0	0	0	0	0	0	2.10653	0.300933
JU062875	0	18	24	6	17	6	0	71	0	1.06071	1.22475	0.612301	1.03075	0.612328	0	0.648691
JU065794	6	12	12	4	4	2	31	71	0.612471	0.865984	0.865958	0.499942	0.499937	0.353484	1.39187	0.727092
JU063687	0	14	16	15	8	15	3	71	0	0.922062	1.01186	0.959292	0.724264	0.967336	0.417175	0.714569
JU065210	5	4	4	8	13	8	28	70	0.559107	0.500046	0.500047	0.707159	0.90139	0.707099	1.32292	0.742538
JU071588	0	5	9	1	10	4	41	70	0	0.559022	0.75007	0.249971	0.790558	0.499995	1.6008	0.635773
JU066158	11	5	8	9	2	5	30	70	0.829143	0.559022	0.707173	0.750039	0.353509	0.55899	1.36927	0.73245
JU071599	5	7	9	6	1	11	31	70	0.559107	0.66138	0.75007	0.612301	0.250109	0.829105	1.39187	0.721992
JU062689	25	11	12	5	4	6	7	70	1.25001	0.829138	0.865958	0.558952	0.499937	0.612328	0.661539	0.75398
JU064415	8	7	15	15	6	1	18	70	0.707048	0.66138	0.968204	0.968231	0.612409	0.249951	1.06059	0.746831
JU064122	1	13	6	8	9	4	28	69	0.25004	0.901441	0.61243	0.707159	0.750045	0.499995	1.32292	0.720575
JU068310	61	0	0	0	0	0	8	69	1.95256	0	0	0	0	0	0.707129	0.379956
JU066648	43	4	5	4	5	0	8	69	1.63933	0.500046	0.55907	0.499942	0.559009	0	0.707129	0.637789
JU066280	5	7	15	7	12	5	18	69	0.559107	0.66138	0.968204	0.661504	0.865997	0.55899	1.06059	0.762254
JU063631	0	13	4	3	17	3	28	68	0	0.901441	0.500047	0.432962	1.03075	0.433035	1.32292	0.660164
JU066222	5	2	4	3	1	15	38	68	0.559107	0.353438	0.500047	0.432962	0.250109	0.968199	1.54108	0.657849
JU063142	27	9	10	7	9	1	4	67	1.29906	0.750034	0.790644	0.661504	0.750045	0.249951	0.500016	0.714465
JU064857	29	5	10	2	1	3	17	67	1.34633	0.559022	0.790644	0.353512	0.250109	0.433035	1.03076	0.680486
JU062813	2	16	22	11	8	0	8	67	0.35361	0.999987	1.1726	0.829174	0.707116	0	0.707129	0.681374
JU063593	1	0	0	0	0	0	66	67	0.25004	0	0	0	0	0	2.03102	0.325866
JU071645	0	10	8	19	5	4	21	67	0	0.790576	0.707173	1.08969	0.559009	0.499995	1.14563	0.684582
JU064087	5	7	9	12	5	2	27	67	0.559107	0.66138	0.75007	0.866034	0.559009	0.353484	1.29896	0.721149
JU070554	0	2	7	0	10	1	47	67	0	0.353438	0.6615	0	0.790558	0.249951	1.71387	0.538475
JU062719	0	1	1	1	0	0	64	67	0	0.249918	0.250023	0.249971	0	0	1.99996	0.392839
JU063966	9	26	14	16	2	0	0	67	0.749958	1.27475	0.935365	0.999979	0.353509	0	0	0.616223
JU062737	0	9	13	8	9	3	24	66	0	0.750034	0.90133	0.707159	0.750045	0.433035	1.22478	0.680912
JU067956	0	6	1	1	1	9	48	66	0	0.612343	0.250023	0.249971	0.250109	0.749976	1.73211	0.549218
scaffold303	19	13	5	7	7	7	8	66	1.08968	0.901441	0.55907	0.661504	0.661407	0.661448	0.707129	0.748811
JU066009	0	6	1	0	4	1	54	66	0	0.612343	0.250023	0	0.499937	0.249951	1.83712	0.492767
JU064793	1	3	9	2	5	4	41	65	0.25004	0.433113	0.75007	0.353512	0.559009	0.499995	1.6008	0.63522
JU062798	36	5	4	10	5	1	4	65	1.5	0.559022	0.500047	0.790597	0.559009	0.249951	0.500016	0.66552
JU062724	0	10	10	19	8	6	12	65	0	0.790576	0.790644	1.08969	0.707116	0.612328	0.866053	0.693772
JU066282	36	8	4	4	4	1	8	65	1.5	0.707172	0.500047	0.499942	0.499937	0.249951	0.707129	0.666311
JU064632	3	4	11	6	12	5	24	65	0.433082	0.500046	0.829079	0.612301	0.865997	0.55899	1.22478	0.717754
JU065614	26	2	7	4	0	13	13	65	1.27477	0.353438	0.6615	0.499942	0	0.901365	0.901357	0.656053
JU070080	0	1	0	0	0	0	64	65	0	0.249918	0	0	0	0	1.99996	0.321411
JU071615	0	1	7	1	1	2	52	64	0	0.249918	0.6615	0.249971	0.250109	0.353484	1.80283	0.509688
JU063321	0	13	17	14	8	12	0	64	0	0.901441	1.03075	0.935407	0.707116	0.866016	0	0.63439
JU071609	4	23	5	6	10	4	12	64	0.50008	1.19892	0.55907	0.612301	0.790558	0.499995	0.866053	0.718139
JU066479	0	3	17	10	17	3	14	64	0	0.433113	1.03075	0.790597	1.03075	0.433035	0.93533	0.664796
JU063015	30	9	8	3	2	0	11	63	1.36935	0.750034	0.707173	0.432962	0.353509	0	0.829246	0.63461
JU062679	0	9	4	4	6	8	32	63	0	0.750034	0.500047	0.499942	0.612409	0.707099	1.41426	0.640541
JU063691	1	13	13	11	8	6	11	63	0.25004	0.901441	0.90133	0.829174	0.707116	0.612328	0.829246	0.718668
JU063647	0	4	7	11	12	0	29	63	0	0.500046	0.6615	0.829174	0.865997	0	1.34629	0.60043
JU071443	0	0	0	0	0	2	61	63	0	0	0	0	0	0.353484	1.9526	0.32944
JU063578	0	12	18	10	7	5	11	63	0	0.865984	1.06064	0.790597	0.661407	0.55899	0.829246	0.680981
JU062799	14	16	21	3	4	1	4	63	0.935434	0.999987	1.14564	0.432962	0.499937	0.249951	0.500016	0.680561
JU064633	5	14	6	5	4	15	14	63	0.559107	0.935444	0.61243	0.558952	0.499937	0.968199	0.93533	0.7242
JU071582	8	4	16	11	2	4	18	63	0.707048	0.500046	0.999965	0.829174	0.353509	0.499995	1.06059	0.70719
JU063343	0	9	24	8	14	7	0	62	0	0.750034	1.22475	0.707159	0.935446	0.661448	0	0.611263
JU065307	0	0	0	0	0	0	62	62	0	0	0	0	0	0	1.96851	0.281216
JU071661	0	2	3	11	3	19	24	62	0	0.353438	0.433053	0.829174	0.433039	1.08968	1.22478	0.62331
JU062958	0	13	12	8	1	15	13	62	0	0.901441	0.865958	0.707159	0.250109	0.968199	0.901357	0.656318
JU063783	8	12	9	4	7	2	20	62	0.707048	0.865984	0.75007	0.499942	0.661407	0.353484	1.11807	0.708001
JU064132	14	11	12	15	4	2	4	62	0.935434	0.829138	0.865958	0.968231	0.499937	0.353484	0.500016	0.707457
JU064128	19	6	7	22	2	4	2	62	1.08968	0.612343	0.6615	1.17263	0.353509	0.499995	0.353264	0.67756
JU064142	9	7	12	8	4	3	19	62	0.736539	0.673275	0.860744	0.718975	0.48252	0.406497	1.07845	0.708143
JU067178	0	8	22	13	5	2	11	61	0	0.707172	1.1726	0.901388	0.559009	0.353484	0.829246	0.646129
JU071023	0	0	0	0	0	0	61	61	0	0	0	0	0	0	1.9526	0.278942
JU064177	3	2	9	6	5	0	36	61	0.433082	0.353438	0.75007	0.612301	0.559009	0	1.50005	0.601135
JU063054	0	3	6	7	11	16	18	61	0	0.433113	0.61243	0.661504	0.829178	0.999989	1.06059	0.656687
JU064139	4	4	13	10	4	5	21	61	0.50008	0.500046	0.90133	0.790597	0.499937	0.55899	1.14563	0.699516
JU071715	0	13	13	8	16	1	10	61	0	0.901441	0.90133	0.707159	1.00001	0.249951	0.79046	0.650051
JU064140	9	5	19	7	7	1	13	61	0.749958	0.559022	1.08971	0.661504	0.661407	0.249951	0.901357	0.69613
JU066270	0	5	24	14	0	4	14	61	0	0.559022	1.22475	0.935407	0	0.499995	0.93533	0.593501
JU067947	0	11	19	8	11	6	6	61	0	0.829138	1.08971	0.707159	0.829178	0.612328	0.612218	0.668533
JU071181	0	4	26	11	11	8	0	60	0	0.500046	1.27477	0.829174	0.829178	0.707099	0	0.591467
JU062873	4	11	15	7	3	4	16	60	0.50008	0.829138	0.968204	0.661504	0.433039	0.499995	1.00003	0.698856
JU069185	0	1	2	3	8	6	40	60	0	0.249918	0.353587	0.432962	0.707116	0.612328	1.58119	0.562443
JU065586	2	17	12	11	6	4	8	60	0.35361	1.03074	0.865958	0.829174	0.612409	0.499995	0.707129	0.69986
JU068699	43	2	2	1	3	0	9	60	1.63933	0.353438	0.353587	0.249971	0.433039	0	0.749953	0.539902
JU065692	7	7	12	12	8	5	9	60	0.66136	0.66138	0.865958	0.866034	0.707116	0.55899	0.749953	0.724399
JU063350	0	0	1	0	1	0	57	59	0	0	0.250023	0	0.250109	0	1.88749	0.341089
JU062869	4	7	14	9	11	7	7	59	0.50008	0.66138	0.935365	0.750039	0.829178	0.661448	0.661539	0.714147
JU063779	4	12	7	5	6	5	20	59	0.50008	0.865984	0.6615	0.558952	0.612409	0.55899	1.11807	0.696569
JU062787	1	0	2	1	0	2	53	59	0.25004	0	0.353587	0.249971	0	0.353484	1.82006	0.432448
JU065436	6	13	7	4	2	9	18	59	0.612471	0.901441	0.6615	0.499942	0.353509	0.749976	1.06059	0.691348
scaffold31	0	3	2	0	0	33	21	59	0	0.433113	0.353587	0	0	1.43608	1.14563	0.481203
JU065871	48	2	3	5	1	0	0	59	1.73205	0.353438	0.433053	0.558952	0.250109	0	0	0.475371
JU065959	0	12	9	7	5	16	10	59	0	0.865984	0.75007	0.661504	0.559009	0.999989	0.79046	0.661002
JU067020	32	8	2	10	5	0	2	59	1.41418	0.707172	0.353587	0.790597	0.559009	0	0.353264	0.59683
JU067798	9	12	21	7	3	2	5	59	0.749958	0.865984	1.14564	0.661504	0.433039	0.353484	0.55894	0.681221
JU062931	0	4	20	13	2	10	10	59	0	0.500046	1.11802	0.901388	0.353509	0.790531	0.79046	0.63628
JU063633	6	3	9	11	9	0	20	58	0.612471	0.433113	0.75007	0.829174	0.750045	0	1.11807	0.641849
JU071703	0	0	1	5	0	0	52	58	0	0	0.250023	0.558952	0	0	1.80283	0.373115
JU062733	17	9	11	12	5	0	4	58	1.03082	0.750034	0.829079	0.866034	0.559009	0	0.500016	0.647857
JU063920	0	0	0	0	0	0	58	58	0	0	0	0	0	0	1.90395	0.271993
JU064497	0	0	3	2	1	2	50	58	0	0	0.433053	0.353512	0.250109	0.353484	1.76776	0.451132
JU064640	0	11	9	7	8	9	14	58	0	0.829138	0.75007	0.661504	0.707116	0.749976	0.93533	0.661877
JU063786	9	3	4	0	2	1	39	58	0.749958	0.433113	0.500047	0	0.353509	0.249951	1.5612	0.549682
JU071591	4	5	4	5	5	4	31	58	0.50008	0.559022	0.500047	0.558952	0.559009	0.499995	1.39187	0.652711
JU063053	21	7	9	4	6	2	9	58	1.14562	0.66138	0.75007	0.499942	0.612409	0.353484	0.749953	0.681836
JU064961	12	9	11	8	0	4	14	58	0.866024	0.750034	0.829079	0.707159	0	0.499995	0.93533	0.655374
JU062825	3	1	11	4	4	0	35	58	0.433082	0.249918	0.829079	0.499942	0.499937	0	1.47896	0.570131
JU064002	0	8	7	6	9	4	23	57	0	0.707172	0.6615	0.612301	0.750045	0.499995	1.19904	0.632865
JU071638	2	4	4	6	9	4	28	57	0.35361	0.500046	0.500047	0.612301	0.750045	0.499995	1.32292	0.648423
JU069525	1	1	5	30	3	2	15	57	0.25004	0.249918	0.55907	1.36929	0.433039	0.353484	0.968331	0.597595
JU071292	0	1	0	0	0	1	55	57	0	0.249918	0	0	0	0.249951	1.85402	0.33627
JU065632	4	5	14	6	5	2	21	57	0.50008	0.559022	0.935365	0.612301	0.559009	0.353484	1.14563	0.666413
JU066380	0	0	0	0	0	1	56	57	0	0	0	0	0	0.249951	1.87077	0.302961
JU062951	0	2	25	6	7	4	13	57	0	0.353438	1.25001	0.612301	0.661407	0.499995	0.901357	0.611216
JU065520	4	8	5	13	1	3	22	56	0.50008	0.707172	0.55907	0.901388	0.250109	0.433035	1.17255	0.6462
JU063031	2	10	9	4	3	3	25	56	0.35361	0.790576	0.75007	0.499942	0.433039	0.433035	1.25	0.644324
JU062870	0	8	10	1	5	2	30	56	0	0.707172	0.790644	0.249971	0.559009	0.353484	1.36927	0.57565
JU068301	0	3	9	19	7	14	4	56	0	0.433113	0.75007	1.08969	0.661407	0.935379	0.500016	0.624239
JU063275	51	2	2	1	0	0	0	56	1.78537	0.353438	0.353587	0.249971	0	0	0	0.391767
JU062996	0	3	7	1	5	14	26	56	0	0.433113	0.6615	0.249971	0.559009	0.935379	1.27471	0.587669
JU067191	0	4	24	18	1	4	5	56	0	0.500046	1.22475	1.06063	0.250109	0.499995	0.55894	0.584924
JU064941	5	2	10	17	3	5	14	56	0.559107	0.353438	0.790644	1.03075	0.433039	0.55899	0.93533	0.6659
JU069174	0	1	0	4	2	3	46	56	0	0.249918	0	0.499942	0.353509	0.433035	1.69557	0.461711
JU065623	41	3	7	2	0	2	0	55	1.60081	0.433113	0.6615	0.353512	0	0.353484	0	0.48606
JU066052	3	9	7	3	7	6	20	55	0.433082	0.750034	0.6615	0.432962	0.661407	0.612328	1.11807	0.667055
JU065122	0	12	17	9	9	1	7	55	0	0.865984	1.03075	0.750039	0.750045	0.249951	0.661539	0.615472
JU066310	0	2	24	6	2	1	20	55	0	0.353438	1.22475	0.612301	0.353509	0.249951	1.11807	0.55886
JU065292	13	16	11	7	5	2	1	55	0.901398	0.999987	0.829079	0.661504	0.559009	0.353484	0.249796	0.650608
scaffold437	7	7	15	4	5	4	13	55	0.66136	0.66138	0.968204	0.499942	0.559009	0.499995	0.901357	0.67875
JU063967	3	4	8	15	12	1	11	54	0.433082	0.500046	0.707173	0.968231	0.865997	0.249951	0.829246	0.650532
JU065291	5	2	7	20	3	0	17	54	0.559107	0.353438	0.6615	1.11807	0.433039	0	1.03076	0.593702
JU065743	3	5	15	11	5	0	15	54	0.433082	0.559022	0.968204	0.829174	0.559009	0	0.968331	0.616689
JU071606	0	1	0	1	0	0	52	54	0	0.249918	0	0.249971	0	0	1.80283	0.32896
JU071750	0	8	4	7	31	3	1	54	0	0.707172	0.500047	0.661504	1.39194	0.433035	0.249796	0.563356
JU064715	6	5	13	10	4	1	15	54	0.612471	0.559022	0.90133	0.790597	0.499937	0.249951	0.968331	0.65452
JU063919	0	1	9	2	9	4	29	54	0	0.249918	0.75007	0.353512	0.750045	0.499995	1.34629	0.564262
JU063609	0	1	0	0	0	0	53	54	0	0.249918	0	0	0	0	1.82006	0.295711
JU064560	0	11	19	11	7	3	3	54	0	0.829138	1.08971	0.829174	0.661407	0.433035	0.433149	0.610802
JU064561	5	9	15	19	1	1	4	54	0.559107	0.750034	0.968204	1.08969	0.250109	0.249951	0.500016	0.623872
JU071681	0	8	4	6	5	6	25	54	0	0.707172	0.500047	0.612301	0.559009	0.612328	1.25	0.605836
JU065471	1	16	12	4	16	2	3	54	0.25004	0.999987	0.865958	0.499942	1.00001	0.353484	0.433149	0.628939
JU065878	16	6	18	6	2	1	5	54	1.00004	0.612343	1.06064	0.612301	0.353509	0.249951	0.55894	0.635389
JU064592	3	9	8	9	3	6	15	53	0.433082	0.750034	0.707173	0.750039	0.433039	0.612328	0.968331	0.664861
JU067828	0	0	0	1	0	0	52	53	0	0	0	0.249971	0	0	1.80283	0.293258
JU066136	0	4	6	12	12	3	16	53	0	0.500046	0.61243	0.866034	0.865997	0.433035	1.00003	0.611082
JU064645	1	11	6	5	10	5	15	53	0.25004	0.829138	0.61243	0.558952	0.790558	0.55899	0.968331	0.652634
JU062721	5	4	14	12	1	8	9	53	0.559107	0.500046	0.935365	0.866034	0.250109	0.707099	0.749953	0.65253
JU063016	0	2	10	17	1	1	22	53	0	0.353438	0.790644	1.03075	0.250109	0.249951	1.17255	0.549634
JU065760	0	13	4	5	0	0	31	53	0	0.901441	0.500047	0.558952	0	0	1.39187	0.478902
scaffold474	15	17	11	4	2	0	4	53	0.968276	1.03074	0.829079	0.499942	0.353509	0	0.500016	0.597366
JU062882	0	20	8	0	4	9	11	52	0	1.11804	0.707173	0	0.499937	0.749976	0.829246	0.557768
JU069224	0	3	15	7	13	14	0	52	0	0.433113	0.968204	0.661504	0.90139	0.935379	0	0.557084
JU064230	28	5	14	4	1	0	0	52	1.3229	0.559022	0.935365	0.499942	0.250109	0	0	0.50962
JU071658	3	7	11	4	10	2	15	52	0.433082	0.66138	0.829079	0.499942	0.790558	0.353484	0.968331	0.647979
scaffold10	18	20	2	2	2	2	6	52	1.06072	1.11804	0.353587	0.353512	0.353509	0.353484	0.612218	0.600724
JU066753	0	9	11	11	6	1	14	52	0	0.750034	0.829079	0.829174	0.612409	0.249951	0.93533	0.600854
JU065850	8	5	9	13	2	1	14	52	0.707048	0.559022	0.75007	0.901388	0.353509	0.249951	0.93533	0.636617
JU065156	14	15	1	4	10	2	6	52	0.935434	0.968254	0.250023	0.499942	0.790558	0.353484	0.612218	0.629988
JU063359	10	5	11	9	6	5	6	52	0.790542	0.559022	0.829079	0.750039	0.612409	0.55899	0.612218	0.673186
JU062888	1	4	9	9	2	11	15	51	0.25004	0.500046	0.75007	0.750039	0.353509	0.829105	0.968331	0.628734
JU062753	0	4	1	0	0	2	44	51	0	0.500046	0.250023	0	0	0.353484	1.65836	0.39456
JU064477	3	19	8	6	4	3	8	51	0.433082	1.08975	0.707173	0.612301	0.499937	0.433035	0.707129	0.640344
JU063748	11	5	8	5	3	3	16	51	0.829143	0.559022	0.707173	0.558952	0.433039	0.433035	1.00003	0.645771
JU062896	3	4	7	4	1	2	30	51	0.433082	0.500046	0.6615	0.499942	0.250109	0.353484	1.36927	0.581062
JU063944	26	6	8	8	2	0	1	51	1.27477	0.612343	0.707173	0.707159	0.353509	0	0.249796	0.557821
JU064526	8	3	13	7	4	0	16	51	0.707048	0.433113	0.90133	0.661504	0.499937	0	1.00003	0.600423
JU064583	49	1	1	0	0	0	0	51	1.75	0.249918	0.250023	0	0	0	0	0.321421
JU066085	0	0	0	0	0	0	51	51	0	0	0	0	0	0	1.78532	0.255046
JU071422	0	0	0	0	0	2	48	50	0	0	0	0	0	0.353484	1.73211	0.297941
JU066218	0	0	0	1	0	3	46	50	0	0	0	0.249971	0	0.433035	1.69557	0.339797
JU062808	20	12	7	9	2	0	0	50	1.118	0.865984	0.6615	0.750039	0.353509	0	0	0.535575
JU065204	1	0	3	3	5	4	34	50	0.25004	0	0.433053	0.432962	0.559009	0.499995	1.45771	0.518967
JU063706	1	4	13	4	8	3	17	50	0.25004	0.500046	0.90133	0.499942	0.707116	0.433035	1.03076	0.617467
JU062886	0	5	12	13	1	2	17	50	0	0.559022	0.865958	0.901388	0.250109	0.353484	1.03076	0.565817
JU062918	0	4	20	17	4	0	5	50	0	0.500046	1.11802	1.03075	0.499937	0	0.55894	0.529671
JU063938	11	6	12	2	14	3	2	50	0.829143	0.612343	0.865958	0.353512	0.935446	0.433035	0.353264	0.6261
JU071673	6	5	11	4	5	3	15	49	0.612471	0.559022	0.829079	0.499942	0.559009	0.433035	0.968331	0.63727
JU069086	32	4	0	6	1	3	3	49	1.41418	0.500046	0	0.612301	0.250109	0.433035	0.433149	0.520403
JU068493	0	5	0	0	9	2	33	49	0	0.559022	0	0	0.750045	0.353484	1.43615	0.442671
JU064149	0	0	0	49	0	0	0	49	0	0	0	1.75001	0	0	0	0.250002
JU071569	0	8	17	18	0	2	4	49	0	0.707172	1.03075	1.06063	0	0.353484	0.500016	0.521721
JU063345	27	8	6	5	0	1	2	49	1.29906	0.707172	0.61243	0.558952	0	0.249951	0.353264	0.540118
JU068969	0	4	10	5	4	4	22	49	0	0.500046	0.790644	0.558952	0.499937	0.499995	1.17255	0.574589
JU062997	10	8	7	8	2	2	11	48	0.790542	0.707172	0.6615	0.707159	0.353509	0.353484	0.829246	0.628945
JU065704	7	6	7	9	0	3	16	48	0.66136	0.612343	0.6615	0.750039	0	0.433035	1.00003	0.58833
JU066193	1	6	4	5	4	5	23	48	0.25004	0.612343	0.500047	0.558952	0.499937	0.55899	1.19904	0.59705
JU071748	0	12	8	19	9	0	0	48	0	0.865984	0.707173	1.08969	0.750045	0	0	0.487555
JU062692	0	1	0	1	0	1	45	48	0	0.249918	0	0.249971	0	0.249951	1.67707	0.346702
JU066151	8	11	3	4	5	1	16	48	0.707048	0.829138	0.433053	0.499942	0.559009	0.249951	1.00003	0.611168
JU065954	1	9	11	6	9	3	9	48	0.25004	0.750034	0.829079	0.612301	0.750045	0.433035	0.749953	0.624927
JU066125	18	9	3	8	3	2	4	47	1.06072	0.750034	0.433053	0.707159	0.433039	0.353484	0.500016	0.605357
JU066403	0	3	5	1	13	8	17	47	0	0.433113	0.55907	0.249971	0.90139	0.707099	1.03076	0.554486
scaffold64	12	4	12	8	6	1	4	47	0.866024	0.500046	0.865958	0.707159	0.612409	0.249951	0.500016	0.614509
JU063012	0	1	0	0	0	1	45	47	0	0.249918	0	0	0	0.249951	1.67707	0.310992
JU064648	5	6	10	7	4	5	10	47	0.559107	0.612343	0.790644	0.661504	0.499937	0.55899	0.79046	0.638998
JU063690	0	5	4	1	4	0	33	47	0	0.559022	0.500047	0.249971	0.499937	0	1.43615	0.463589
JU066244	0	12	7	0	4	12	12	47	0	0.865984	0.6615	0	0.499937	0.866016	0.866053	0.53707
JU063641	0	3	1	0	3	1	39	47	0	0.433113	0.250023	0	0.433039	0.249951	1.5612	0.418189
JU064338	0	0	0	0	0	0	47	47	0	0	0	0	0	0	1.71387	0.244839
JU066079	0	5	14	9	10	3	6	47	0	0.559022	0.935365	0.750039	0.790558	0.433035	0.612218	0.582891
JU062972	0	3	4	6	15	11	7	46	0	0.433113	0.500047	0.612301	0.968232	0.829105	0.661539	0.572048
JU066030	34	3	8	0	0	0	1	46	1.45772	0.433113	0.707173	0	0	0	0.249796	0.406829
JU062762	1	3	8	1	1	1	31	46	0.25004	0.433113	0.707173	0.249971	0.250109	0.249951	1.39187	0.504604
JU065666	13	5	2	2	4	4	16	46	0.901398	0.559022	0.353587	0.353512	0.499937	0.499995	1.00003	0.595354
contig9409	46	0	0	0	0	0	0	46	1.69557	0	0	0	0	0	0	0.242224
JU062877	22	1	9	6	3	1	4	46	1.17258	0.249918	0.75007	0.612301	0.433039	0.249951	0.500016	0.56684
JU062867	0	3	4	3	6	3	27	46	0	0.433113	0.500047	0.432962	0.612409	0.433035	1.29896	0.530075
JU062968	0	2	12	1	2	6	23	46	0	0.353438	0.865958	0.249971	0.353509	0.612328	1.19904	0.519178
JU063391	0	11	9	16	7	2	1	46	0	0.829138	0.75007	0.999979	0.661407	0.353484	0.249796	0.549125
JU069365	0	15	12	0	7	3	9	46	0	0.968254	0.865958	0	0.661407	0.433035	0.749953	0.525515
JU071062	0	8	7	10	6	10	4	45	0	0.707172	0.6615	0.790597	0.612409	0.790531	0.500016	0.580318
JU063543	4	7	9	3	2	1	19	45	0.50008	0.66138	0.75007	0.432962	0.353509	0.249951	1.08981	0.576823
JU071617	15	6	4	2	6	4	8	45	0.968276	0.612343	0.500047	0.353512	0.612409	0.499995	0.707129	0.607673
JU065800	38	3	1	1	2	0	0	45	1.54111	0.433113	0.250023	0.249971	0.353509	0	0	0.403961
JU064498	0	0	0	0	0	0	45	45	0	0	0	0	0	0	1.67707	0.239582
JU062700	3	3	8	0	0	0	31	45	0.433082	0.433113	0.707173	0	0	0	1.39187	0.423606
JU070095	0	7	14	9	4	0	11	45	0	0.66138	0.935365	0.750039	0.499937	0	0.829246	0.525138
JU063889	0	2	8	2	3	5	25	45	0	0.353438	0.707173	0.353512	0.433039	0.55899	1.25	0.522307
JU063570	16	4	4	1	1	2	16	44	1.00004	0.500046	0.500047	0.249971	0.250109	0.353484	1.00003	0.550532
JU071573	0	2	1	0	0	1	40	44	0	0.353438	0.250023	0	0	0.249951	1.58119	0.3478
JU065708	3	12	5	5	6	5	8	44	0.433082	0.865984	0.55907	0.558952	0.612409	0.55899	0.707129	0.61366
JU064340	2	2	5	4	5	2	24	44	0.35361	0.353438	0.55907	0.499942	0.559009	0.353484	1.22478	0.557619
JU069968	6	13	7	4	2	2	10	44	0.612471	0.901441	0.6615	0.499942	0.353509	0.353484	0.79046	0.596115
JU065201	1	11	6	10	3	3	10	44	0.25004	0.829138	0.61243	0.790597	0.433039	0.433035	0.79046	0.591248
JU068324	40	2	0	0	2	0	0	44	1.58116	0.353438	0	0	0.353509	0	0	0.326873
JU069274	0	1	4	4	11	7	17	44	0	0.249918	0.500047	0.499942	0.829178	0.661448	1.03076	0.538756
JU065015	0	8	5	2	5	2	22	44	0	0.707172	0.55907	0.353512	0.559009	0.353484	1.17255	0.529257
JU063403	3	1	6	2	2	4	26	44	0.433082	0.249918	0.61243	0.353512	0.353509	0.499995	1.27471	0.539594
JU062963	0	2	6	2	5	3	26	44	0	0.353438	0.61243	0.353512	0.559009	0.433035	1.27471	0.512305
JU063252	0	7	5	4	3	7	18	44	0	0.66138	0.55907	0.499942	0.433039	0.661448	1.06059	0.553639
JU071330	13	7	8	3	5	2	6	44	0.901398	0.66138	0.707173	0.432962	0.559009	0.353484	0.612218	0.603946
JU071665	7	6	11	6	5	1	8	44	0.66136	0.612343	0.829079	0.612301	0.559009	0.249951	0.707129	0.604453
JU065258	3	8	10	1	1	0	20	43	0.433082	0.707172	0.790644	0.249971	0.250109	0	1.11807	0.507007
JU062953	0	3	8	3	1	5	23	43	0	0.433113	0.707173	0.432962	0.250109	0.55899	1.19904	0.511627
JU062759	1	4	7	4	3	4	20	43	0.25004	0.500046	0.6615	0.499942	0.433039	0.499995	1.11807	0.56609
JU066750	1	9	16	4	5	1	7	43	0.25004	0.750034	0.999965	0.499942	0.559009	0.249951	0.661539	0.567211
JU065257	2	10	6	9	9	1	6	43	0.35361	0.790576	0.61243	0.750039	0.750045	0.249951	0.612218	0.58841
JU062786	5	7	14	4	2	0	11	43	0.559107	0.66138	0.935365	0.499942	0.353509	0	0.829246	0.548364
JU062919	0	0	2	0	3	0	38	43	0	0	0.353587	0	0.433039	0	1.54108	0.33253
JU065303	3	4	5	5	3	1	22	43	0.433082	0.500046	0.55907	0.558952	0.433039	0.249951	1.17255	0.558099
JU062978	0	3	16	2	13	9	0	43	0	0.433113	0.999965	0.353512	0.90139	0.749976	0	0.491137
JU066091	0	7	9	9	3	1	14	43	0	0.66138	0.75007	0.750039	0.433039	0.249951	0.93533	0.539973
JU071657	0	5	0	0	3	1	34	43	0	0.559022	0	0	0.433039	0.249951	1.45771	0.385675
JU065504	0	1	1	0	1	2	38	43	0	0.249918	0.250023	0	0.250109	0.353484	1.54108	0.377803
JU063020	8	4	7	1	2	3	18	43	0.707048	0.500046	0.6615	0.249971	0.353509	0.433035	1.06059	0.566529
JU063939	2	12	5	1	3	2	18	43	0.35361	0.865984	0.55907	0.249971	0.433039	0.353484	1.06059	0.553679
JU064626	0	4	1	3	0	0	35	43	0	0.500046	0.250023	0.432962	0	0	1.47896	0.380284
JU067638	0	2	0	0	1	1	39	43	0	0.353438	0	0	0.250109	0.249951	1.5612	0.344956
JU062706	0	0	1	0	1	0	40	42	0	0	0.250023	0	0.250109	0	1.58119	0.297332
JU071742	0	0	0	1	1	0	40	42	0	0	0	0.249971	0.250109	0	1.58119	0.297324
JU062859	13	5	4	8	4	1	7	42	0.901398	0.559022	0.500047	0.707159	0.499937	0.249951	0.661539	0.582722
JU063171	0	0	2	0	0	0	40	42	0	0	0.353587	0	0	0	1.58119	0.276396
JU064118	15	4	5	3	1	1	13	42	0.968276	0.500046	0.55907	0.432962	0.250109	0.249951	0.901357	0.551681
JU066634	0	5	18	8	4	7	0	42	0	0.559022	1.06064	0.707159	0.499937	0.661448	0	0.498315
JU063807	0	6	7	4	3	1	21	42	0	0.612343	0.6615	0.499942	0.433039	0.249951	1.14563	0.51463
JU063213	0	0	0	0	0	0	42	42	0	0	0	0	0	0	1.62017	0.231453
JU070516	0	0	0	0	0	0	42	42	0	0	0	0	0	0	1.62017	0.231453
JU064130	7	12	8	8	5	2	0	42	0.66136	0.865984	0.707173	0.707159	0.559009	0.353484	0	0.550596
JU065231	3	6	4	2	3	11	13	42	0.433082	0.612343	0.500047	0.353512	0.433039	0.829105	0.901357	0.580355
JU062776	26	6	2	6	2	0	0	42	1.27477	0.612343	0.353587	0.612301	0.353509	0	0	0.458073
JU063250	0	2	1	0	0	10	29	42	0	0.353438	0.250023	0	0	0.790531	1.34629	0.39147
JU064104	0	6	8	5	5	9	9	42	0	0.612343	0.707173	0.558952	0.559009	0.749976	0.749953	0.562487
JU062957	0	1	0	0	1	1	39	42	0	0.249918	0	0	0.250109	0.249951	1.5612	0.330168
JU071683	0	0	1	0	0	2	39	42	0	0	0.250023	0	0	0.353484	1.5612	0.309243
JU068395	7	12	6	6	1	1	9	42	0.66136	0.865984	0.61243	0.612301	0.250109	0.249951	0.749953	0.571727
JU070794	0	1	18	4	5	1	13	42	0	0.249918	1.06064	0.499942	0.559009	0.249951	0.901357	0.502974
JU071590	3	3	6	3	7	3	16	41	0.433082	0.433113	0.61243	0.432962	0.661407	0.433035	1.00003	0.572294
JU064829	1	4	6	14	8	0	8	41	0.25004	0.500046	0.61243	0.935407	0.707116	0	0.707129	0.53031
JU066061	1	0	6	2	2	11	19	41	0.25004	0	0.61243	0.353512	0.353509	0.829105	1.08981	0.498343
JU062900	12	8	1	7	4	5	4	41	0.866024	0.707172	0.250023	0.661504	0.499937	0.55899	0.500016	0.577667
JU062720	0	7	6	1	2	2	23	41	0	0.66138	0.61243	0.249971	0.353509	0.353484	1.19904	0.489973
JU063204	0	0	0	0	0	0	41	41	0	0	0	0	0	0	1.6008	0.228685
JU066537	0	3	3	4	2	4	25	41	0	0.433113	0.433053	0.499942	0.353509	0.499995	1.25	0.495658
JU069508	0	3	3	2	9	2	22	41	0	0.433113	0.433053	0.353512	0.750045	0.353484	1.17255	0.499394
JU067693	40	0	0	0	0	0	1	41	1.58116	0	0	0	0	0	0.249796	0.261565
JU066342	0	0	41	0	0	0	0	41	0	0	1.60077	0	0	0	0	0.228682
scaffold571	23	4	8	3	2	0	1	41	1.19895	0.500046	0.707173	0.432962	0.353509	0	0.249796	0.491776
JU069301	31	3	1	2	3	0	1	41	1.3919	0.433113	0.250023	0.353512	0.433039	0	0.249796	0.444484
JU066707	0	9	15	6	7	4	0	41	0	0.750034	0.968204	0.612301	0.661407	0.499995	0	0.498849
JU063903	0	0	1	0	0	1	39	41	0	0	0.250023	0	0	0.249951	1.5612	0.294453
JU065898	7	9	12	2	1	0	10	41	0.66136	0.750034	0.865958	0.353512	0.250109	0	0.79046	0.52449
JU062847	20	2	3	3	2	2	9	41	1.118	0.353438	0.433053	0.432962	0.353509	0.353484	0.749953	0.542056
JU065116	1	5	7	7	2	3	15	40	0.25004	0.559022	0.6615	0.661504	0.353509	0.433035	0.968331	0.555277
JU068639	0	3	1	2	3	12	19	40	0	0.433113	0.250023	0.353512	0.433039	0.866016	1.08981	0.489359
JU062838	0	3	9	4	0	0	24	40	0	0.433113	0.75007	0.499942	0	0	1.22478	0.415416
JU063086	4	8	9	3	6	1	9	40	0.50008	0.707172	0.75007	0.432962	0.612409	0.249951	0.749953	0.5718
scaffold264	3	3	7	4	1	1	21	40	0.433082	0.433113	0.6615	0.499942	0.250109	0.249951	1.14563	0.524761
JU064630	15	5	3	7	2	4	4	40	0.968276	0.559022	0.433053	0.661504	0.353509	0.499995	0.500016	0.567911
JU063486	2	4	7	9	2	3	13	40	0.35361	0.500046	0.6615	0.750039	0.353509	0.433035	0.901357	0.564728
JU063580	0	9	1	2	3	1	24	40	0	0.750034	0.250023	0.353512	0.433039	0.249951	1.22478	0.465906
JU062835	0	4	4	4	4	0	24	40	0	0.500046	0.500047	0.499942	0.499937	0	1.22478	0.460679
JU067867	2	9	7	4	8	1	9	40	0.35361	0.750034	0.6615	0.499942	0.707116	0.249951	0.749953	0.567444
JU066328	3	4	8	5	2	4	14	40	0.433082	0.500046	0.707173	0.558952	0.353509	0.499995	0.93533	0.569727
JU064975	0	0	0	0	2	0	38	40	0	0	0	0	0.353509	0	1.54108	0.270656
JU070377	3	5	12	1	5	6	8	40	0.433082	0.559022	0.865958	0.249971	0.559009	0.612328	0.707129	0.5695
scaffold328	0	33	2	0	4	1	0	40	0	1.43611	0.353587	0	0.499937	0.249951	0	0.362798
JU063742	0	5	11	7	1	2	14	40	0	0.559022	0.829079	0.661504	0.250109	0.353484	0.93533	0.512647
JU064646	14	11	5	5	2	2	1	40	0.935434	0.829138	0.55907	0.558952	0.353509	0.353484	0.249796	0.548483
JU064100	4	9	8	9	3	3	3	39	0.50008	0.750034	0.707173	0.750039	0.433039	0.433035	0.433149	0.572364
JU063147	1	3	8	5	3	4	15	39	0.25004	0.433113	0.707173	0.558952	0.433039	0.499995	0.968331	0.550092
JU070379	0	1	0	0	1	1	36	39	0	0.249918	0	0	0.250109	0.249951	1.50005	0.321432
JU069828	0	12	5	8	9	5	0	39	0	0.865984	0.55907	0.707159	0.750045	0.55899	0	0.491607
JU063119	0	8	8	1	3	1	18	39	0	0.707172	0.707173	0.249971	0.433039	0.249951	1.06059	0.486843
JU065862	2	2	13	7	7	1	7	39	0.35361	0.353438	0.90133	0.661504	0.661407	0.249951	0.661539	0.548968
JU069921	0	0	0	0	1	0	38	39	0	0	0	0	0.250109	0	1.54108	0.255885
JU065016	5	5	12	8	4	1	4	39	0.559107	0.559022	0.865958	0.707159	0.499937	0.249951	0.500016	0.563021
JU065338	11	9	6	6	4	3	0	39	0.829143	0.750034	0.61243	0.612301	0.499937	0.433035	0	0.53384
JU065982	26	6	2	5	0	0	0	39	1.27477	0.612343	0.353587	0.558952	0	0	0	0.39995
JU063584	3	4	2	5	6	1	18	39	0.433082	0.500046	0.353587	0.558952	0.612409	0.249951	1.06059	0.538374
JU064955	0	12	3	8	4	3	9	39	0	0.865984	0.433053	0.707159	0.499937	0.433035	0.749953	0.527017
JU062701	0	0	0	0	0	0	39	39	0	0	0	0	0	0	1.5612	0.223028
JU063487	0	6	4	5	7	3	14	39	0	0.612343	0.500047	0.558952	0.661407	0.433035	0.93533	0.528731
JU069502	0	7	6	5	5	2	14	39	0	0.66138	0.61243	0.558952	0.559009	0.353484	0.93533	0.525798
JU064159	0	4	7	10	5	1	11	38	0	0.500046	0.6615	0.790597	0.559009	0.249951	0.829246	0.512907
JU064029	13	4	5	0	3	2	11	38	0.901398	0.500046	0.55907	0	0.433039	0.353484	0.829246	0.510897
JU070178	6	5	4	11	7	2	3	38	0.612471	0.559022	0.500047	0.829174	0.661407	0.353484	0.433149	0.564108
JU071564	1	7	7	8	6	2	7	38	0.25004	0.66138	0.6615	0.707159	0.612409	0.353484	0.661539	0.558216
JU064049	1	5	6	7	3	8	8	38	0.25004	0.559022	0.61243	0.661504	0.433039	0.707099	0.707129	0.561466
scaffold310	2	4	9	5	10	5	3	38	0.35361	0.500046	0.75007	0.558952	0.790558	0.55899	0.433149	0.563625
JU062746	3	4	7	6	10	5	3	38	0.433082	0.500046	0.6615	0.612301	0.790558	0.55899	0.433149	0.569947
JU065548	3	9	4	7	5	1	9	38	0.433082	0.750034	0.500047	0.661504	0.559009	0.249951	0.749953	0.557654
JU065780	2	0	5	12	4	3	12	38	0.35361	0	0.55907	0.866034	0.499937	0.433035	0.866053	0.511105
JU064692	1	4	2	0	5	1	25	38	0.25004	0.500046	0.353587	0	0.559009	0.249951	1.25	0.451804
JU065211	6	5	4	3	2	1	17	38	0.612471	0.559022	0.500047	0.432962	0.353509	0.249951	1.03076	0.534103
JU070069	38	0	0	0	0	0	0	38	1.54111	0	0	0	0	0	0	0.220159
JU064394	37	0	1	0	0	0	0	38	1.52069	0	0.250023	0	0	0	0	0.25296
JU064605	1	2	8	10	3	1	13	38	0.25004	0.353438	0.707173	0.790597	0.433039	0.249951	0.901357	0.526514
JU069220	0	0	0	0	0	1	37	38	0	0	0	0	0	0.249951	1.5207	0.252951
JU066175	1	2	1	10	1	11	12	38	0.25004	0.353438	0.250023	0.790597	0.250109	0.829105	0.866053	0.512767
JU065665	0	7	7	6	6	4	8	38	0	0.66138	0.6615	0.612301	0.612409	0.499995	0.707129	0.536388
JU071635	14	5	5	8	0	0	6	38	0.935434	0.559022	0.55907	0.707159	0	0	0.612218	0.481843
JU064031	0	2	0	0	1	2	33	38	0	0.353438	0	0	0.250109	0.353484	1.43615	0.341883
JU069656	0	0	38	0	0	0	0	38	0	0	1.54108	0	0	0	0	0.220154
JU062766	2	6	3	2	3	0	22	38	0.35361	0.612343	0.433053	0.353512	0.433039	0	1.17255	0.47973
JU065294	3	0	17	5	4	1	8	38	0.433082	0	1.03075	0.558952	0.499937	0.249951	0.707129	0.497114
JU064146	9	4	10	3	2	0	10	38	0.749958	0.500046	0.790644	0.432962	0.353509	0	0.79046	0.516797
scaffold450	2	0	2	0	4	3	27	38	0.35361	0	0.353587	0	0.499937	0.433035	1.29896	0.419875
JU069953	0	0	1	1	0	9	27	38	0	0	0.250023	0.249971	0	0.749976	1.29896	0.364132
JU064271	1	8	5	14	1	1	7	37	0.25004	0.707172	0.55907	0.935407	0.250109	0.249951	0.661539	0.516184
JU068498	0	3	4	0	1	8	21	37	0	0.433113	0.500047	0	0.250109	0.707099	1.14563	0.433714
JU064496	0	0	0	1	0	0	36	37	0	0	0	0.249971	0	0	1.50005	0.250003
JU071202	14	20	1	1	1	0	0	37	0.935434	1.11804	0.250023	0.249971	0.250109	0	0	0.400512
JU064891	25	4	3	0	5	0	0	37	1.25001	0.500046	0.433053	0	0.559009	0	0	0.391731
JU069865	0	0	0	0	0	0	37	37	0	0	0	0	0	0	1.5207	0.217243
JU065405	10	8	7	7	3	0	2	37	0.790542	0.707172	0.6615	0.661504	0.433039	0	0.353264	0.515289
JU071221	28	4	0	3	1	0	1	37	1.3229	0.500046	0	0.432962	0.250109	0	0.249796	0.393688
JU064707	2	4	7	6	2	3	13	37	0.35361	0.500046	0.6615	0.612301	0.353509	0.433035	0.901357	0.545051
JU070270	0	2	1	4	5	2	23	37	0	0.353438	0.250023	0.499942	0.559009	0.353484	1.19904	0.459277
JU063585	9	1	9	4	2	4	8	37	0.749958	0.249918	0.75007	0.499942	0.353509	0.499995	0.707129	0.54436
JU063941	0	3	17	11	0	5	1	37	0	0.433113	1.03075	0.829174	0	0.55899	0.249796	0.443117
JU070719	0	7	5	10	8	2	5	37	0	0.66138	0.55907	0.790597	0.707116	0.353484	0.55894	0.518655
JU066068	7	5	3	6	3	1	12	37	0.66136	0.559022	0.433053	0.612301	0.433039	0.249951	0.866053	0.544968
JU063724	2	5	6	4	7	3	10	37	0.35361	0.559022	0.61243	0.499942	0.661407	0.433035	0.79046	0.558558
JU063360	20	2	9	1	0	0	5	37	1.118	0.353438	0.75007	0.249971	0	0	0.55894	0.432916
JU063156	21	2	1	10	1	1	1	37	1.14562	0.353438	0.250023	0.790597	0.250109	0.249951	0.249796	0.469933
JU069016	0	1	0	0	1	0	35	37	0	0.249918	0	0	0.250109	0	1.47896	0.282712
JU064426	0	2	2	2	0	1	30	37	0	0.353438	0.353587	0.353512	0	0.249951	1.36927	0.382823
JU068583	0	1	0	1	0	0	35	37	0	0.249918	0	0.249971	0	0	1.47896	0.282693
JU065009	2	3	5	3	2	2	19	36	0.35361	0.433113	0.55907	0.432962	0.353509	0.353484	1.08981	0.510794
contig15	1	15	6	8	2	1	3	36	0.25004	0.968254	0.61243	0.707159	0.353509	0.249951	0.433149	0.510642
JU063135	0	8	8	5	4	4	7	36	0	0.707172	0.707173	0.558952	0.499937	0.499995	0.661539	0.519252
JU071656	7	10	5	9	1	1	3	36	0.66136	0.790576	0.55907	0.750039	0.250109	0.249951	0.433149	0.52775
scaffold616	1	4	4	4	2	2	19	36	0.25004	0.500046	0.500047	0.499942	0.353509	0.353484	1.08981	0.506696
JU070103	0	0	1	3	2	7	23	36	0	0	0.250023	0.432962	0.353509	0.661448	1.19904	0.413855
JU063346	2	6	6	5	5	1	11	36	0.35361	0.612343	0.61243	0.558952	0.559009	0.249951	0.829246	0.539363
JU068262	3	4	6	1	3	6	13	36	0.433082	0.500046	0.61243	0.249971	0.433039	0.612328	0.901357	0.534608
JU063225	1	0	2	0	0	0	33	36	0.25004	0	0.353587	0	0	0	1.43615	0.291397
JU064544	0	7	3	6	6	7	7	36	0	0.66138	0.433053	0.612301	0.612409	0.661448	0.661539	0.520304
JU068018	30	2	0	3	1	0	0	36	1.36935	0.353438	0	0.432962	0.250109	0	0	0.343694
JU064265	0	5	3	0	8	3	17	36	0	0.559022	0.433053	0	0.707116	0.433035	1.03076	0.451855
JU062783	0	3	8	9	7	7	2	36	0	0.433113	0.707173	0.750039	0.661407	0.661448	0.353264	0.509492
contig7137	36	0	0	0	0	0	0	36	1.5	0	0	0	0	0	0	0.214285
scaffold169	12	0	7	2	2	0	13	36	0.866024	0	0.6615	0.353512	0.353509	0	0.901357	0.447986
JU062781	2	8	4	1	5	2	14	36	0.35361	0.707172	0.500047	0.249971	0.559009	0.353484	0.93533	0.52266
JU063006	15	9	1	4	2	0	5	36	0.968276	0.750034	0.250023	0.499942	0.353509	0	0.55894	0.48296
JU071678	11	6	4	2	4	1	8	36	0.829143	0.612343	0.500047	0.353512	0.499937	0.249951	0.707129	0.536009
contig4072	35	0	0	0	0	0	1	36	1.47901	0	0	0	0	0	0.249796	0.246972
JU063744	0	8	3	1	4	2	18	36	0	0.707172	0.433053	0.249971	0.499937	0.353484	1.06059	0.47203
scaffold439	7	4	12	3	6	0	4	36	0.66136	0.500046	0.865958	0.432962	0.612409	0	0.500016	0.510393
JU065352	0	0	1	0	0	0	35	36	0	0	0.250023	0	0	0	1.47896	0.246997
scaffold138	7	12	5	4	6	1	1	36	0.66136	0.865984	0.55907	0.499942	0.612409	0.249951	0.249796	0.528359
JU063971	2	7	9	6	4	2	6	36	0.35361	0.66138	0.75007	0.612301	0.499937	0.353484	0.612218	0.549
JU066104	1	3	2	3	6	0	20	35	0.25004	0.433113	0.353587	0.432962	0.612409	0	1.11807	0.457169
JU062804	7	9	5	7	3	0	4	35	0.66136	0.750034	0.55907	0.661504	0.433039	0	0.500016	0.509289
JU065914	5	2	10	11	1	1	5	35	0.559107	0.353438	0.790644	0.829174	0.250109	0.249951	0.55894	0.513052
JU065107	26	1	1	2	1	0	4	35	1.27477	0.249918	0.250023	0.353512	0.250109	0	0.500016	0.411192
JU065358	0	0	0	0	1	0	34	35	0	0	0	0	0.250109	0	1.45771	0.243974
JU067098	0	0	0	0	0	2	33	35	0	0	0	0	0	0.353484	1.43615	0.255662
contig1196	22	6	2	1	3	1	0	35	1.17258	0.612343	0.353587	0.249971	0.433039	0.249951	0	0.438782
JU062910	0	10	20	5	0	0	0	35	0	0.790576	1.11802	0.558952	0	0	0	0.352507
JU070210	0	3	2	5	3	12	10	35	0	0.433113	0.353587	0.558952	0.433039	0.866016	0.79046	0.490738
JU065540	7	8	3	2	6	3	6	35	0.66136	0.707172	0.433053	0.353512	0.612409	0.433035	0.612218	0.54468
JU065012	10	4	5	4	2	5	5	35	0.790542	0.500046	0.55907	0.499942	0.353509	0.55899	0.55894	0.545863
JU063958	0	4	11	0	0	2	18	35	0	0.500046	0.829079	0	0	0.353484	1.06059	0.391886
JU071732	0	2	14	16	1	0	2	35	0	0.353438	0.935365	0.999979	0.250109	0	0.353264	0.413165
JU065336	4	3	5	11	2	1	8	34	0.50008	0.433113	0.55907	0.829174	0.353509	0.249951	0.707129	0.518861
JU071603	7	0	6	9	1	0	11	34	0.66136	0	0.61243	0.750039	0.250109	0	0.829246	0.443312
JU064895	2	3	3	2	3	9	12	34	0.35361	0.433113	0.433053	0.353512	0.433039	0.749976	0.866053	0.517479
JU062921	0	3	10	17	0	0	4	34	0	0.433113	0.790644	1.03075	0	0	0.500016	0.393503
JU069578	16	9	2	4	3	0	0	34	1.00004	0.750034	0.353587	0.499942	0.433039	0	0	0.433806
JU063424	19	0	5	3	0	0	7	34	1.08968	0	0.55907	0.432962	0	0	0.661539	0.391892
JU062713	0	3	8	2	7	1	13	34	0	0.433113	0.707173	0.353512	0.661407	0.249951	0.901357	0.472359
JU064571	0	1	4	1	3	13	12	34	0	0.249918	0.500047	0.249971	0.433039	0.901365	0.866053	0.457199
scaffold623	4	5	6	2	4	0	13	34	0.50008	0.559022	0.61243	0.353512	0.499937	0	0.901357	0.489477
JU063791	4	2	6	9	3	0	10	34	0.50008	0.353438	0.61243	0.750039	0.433039	0	0.79046	0.491355
JU065200	0	5	2	3	19	0	5	34	0	0.559022	0.353587	0.432962	1.08975	0	0.55894	0.427751
JU071664	18	7	2	4	1	1	1	34	1.06072	0.66138	0.353587	0.499942	0.250109	0.249951	0.249796	0.475068
JU070839	5	4	2	4	8	1	10	34	0.559107	0.500046	0.353587	0.499942	0.707116	0.249951	0.79046	0.522887
JU066550	0	0	0	0	0	0	34	34	0	0	0	0	0	0	1.45771	0.208244
JU069588	0	0	0	0	0	0	34	34	0	0	0	0	0	0	1.45771	0.208244
JU071589	0	0	2	1	0	1	30	34	0	0	0.353587	0.249971	0	0.249951	1.36927	0.31754
JU066293	0	0	34	0	0	0	0	34	0	0	1.4577	0	0	0	0	0.208243
JU068607	3	7	2	2	4	3	13	34	0.433082	0.66138	0.353587	0.353512	0.499937	0.433035	0.901357	0.519413
JU065549	2	8	5	3	4	6	6	34	0.35361	0.707172	0.55907	0.432962	0.499937	0.612328	0.612218	0.539614
JU068568	0	1	0	1	1	0	31	34	0	0.249918	0	0.249971	0.250109	0	1.39187	0.305981
JU066022	1	12	7	5	0	3	6	34	0.25004	0.865984	0.6615	0.558952	0	0.433035	0.612218	0.483104
JU067419	0	11	2	2	3	2	14	34	0	0.829138	0.353587	0.353512	0.433039	0.353484	0.93533	0.465441
JU065118	1	6	6	4	4	3	10	34	0.25004	0.612343	0.61243	0.499942	0.499937	0.433035	0.79046	0.528312
JU065085	21	1	8	2	0	0	2	34	1.14562	0.249918	0.707173	0.353512	0	0	0.353264	0.401355
JU071616	0	7	3	1	5	8	10	34	0	0.66138	0.433053	0.249971	0.559009	0.707099	0.79046	0.485853
JU065830	6	4	6	7	6	0	4	33	0.612471	0.500046	0.61243	0.661504	0.612409	0	0.500016	0.499839
JU063116	6	4	6	2	3	1	11	33	0.612471	0.500046	0.61243	0.353512	0.433039	0.249951	0.829246	0.512956
JU066121	5	10	4	8	1	0	5	33	0.559107	0.790576	0.500047	0.707159	0.250109	0	0.55894	0.480848
JU065844	2	5	4	6	3	2	11	33	0.35361	0.559022	0.500047	0.612301	0.433039	0.353484	0.829246	0.520107
JU071583	0	3	10	2	3	2	13	33	0	0.433113	0.790644	0.353512	0.433039	0.353484	0.901357	0.46645
JU063813	0	7	5	2	0	8	11	33	0	0.66138	0.55907	0.353512	0	0.707099	0.829246	0.44433
JU069081	0	11	6	2	3	3	8	33	0	0.829138	0.61243	0.353512	0.433039	0.433035	0.707129	0.481183
JU063618	8	0	3	4	3	4	11	33	0.707048	0	0.433053	0.499942	0.433039	0.499995	0.829246	0.486046
JU071342	3	2	5	1	1	0	21	33	0.433082	0.353438	0.55907	0.249971	0.250109	0	1.14563	0.427329
JU066729	1	4	2	0	1	3	22	33	0.25004	0.500046	0.353587	0	0.250109	0.433035	1.17255	0.422767
JU063265	4	3	2	5	1	0	18	33	0.50008	0.433113	0.353587	0.558952	0.250109	0	1.06059	0.450919
JU070769	6	5	0	5	4	1	12	33	0.612471	0.559022	0	0.558952	0.499937	0.249951	0.866053	0.478055
JU063333	0	3	12	3	11	0	4	33	0	0.433113	0.865958	0.432962	0.829178	0	0.500016	0.437318
JU065639	7	5	4	9	7	1	0	33	0.66136	0.559022	0.500047	0.750039	0.661407	0.249951	0	0.483118
JU065932	0	5	4	1	2	3	18	33	0	0.559022	0.500047	0.249971	0.353509	0.433035	1.06059	0.450882
JU063170	0	1	0	0	1	0	31	33	0	0.249918	0	0	0.250109	0	1.39187	0.270271
JU063348	0	4	3	4	4	4	14	33	0	0.500046	0.433053	0.499942	0.499937	0.499995	0.93533	0.481186
JU064284	0	2	2	0	2	1	26	33	0	0.353438	0.353587	0	0.353509	0.249951	1.27471	0.369314
scaffold500	3	2	13	1	1	3	10	33	0.433082	0.353438	0.90133	0.249971	0.250109	0.433035	0.79046	0.487346
JU064862	7	2	1	3	4	3	13	33	0.66136	0.353438	0.250023	0.432962	0.499937	0.433035	0.901357	0.504588
JU063327	1	9	6	7	3	3	3	32	0.25004	0.750034	0.61243	0.661504	0.433039	0.433035	0.433149	0.510462
JU069108	2	3	2	1	3	2	19	32	0.35361	0.433113	0.353587	0.249971	0.433039	0.353484	1.08981	0.466659
JU063804	0	4	8	5	1	7	7	32	0	0.500046	0.707173	0.558952	0.250109	0.661448	0.661539	0.477038
JU070001	0	3	6	5	6	1	11	32	0	0.433113	0.61243	0.558952	0.612409	0.249951	0.829246	0.470872
scaffold114	5	3	6	7	5	1	5	32	0.559107	0.433113	0.61243	0.661504	0.559009	0.249951	0.55894	0.51915
JU070187	6	9	3	4	5	2	3	32	0.612471	0.750034	0.433053	0.499942	0.559009	0.353484	0.433149	0.520163
JU062791	0	4	6	3	2	2	15	32	0	0.500046	0.61243	0.432962	0.353509	0.353484	0.968331	0.460109
JU063859	1	0	0	1	1	1	28	32	0.25004	0	0	0.249971	0.250109	0.249951	1.32292	0.331855
JU065128	0	3	2	2	0	5	20	32	0	0.433113	0.353587	0.353512	0	0.55899	1.11807	0.402467
JU063033	0	3	10	17	2	0	0	32	0	0.433113	0.790644	1.03075	0.353509	0	0	0.372573
JU062809	0	1	1	1	1	8	20	32	0	0.249918	0.250023	0.249971	0.250109	0.707099	1.11807	0.403599
JU064998	0	3	4	10	1	4	10	32	0	0.433113	0.500047	0.790597	0.250109	0.499995	0.79046	0.466331
JU067186	30	0	1	0	0	0	1	32	1.36935	0	0.250023	0	0	0	0.249796	0.267024
JU069610	3	4	8	7	2	2	6	32	0.433082	0.500046	0.707173	0.661504	0.353509	0.353484	0.612218	0.517288
JU064131	9	3	5	11	1	2	1	32	0.749958	0.433113	0.55907	0.829174	0.250109	0.353484	0.249796	0.489243
JU066015	3	2	2	19	1	1	4	32	0.433082	0.353438	0.353587	1.08969	0.250109	0.249951	0.500016	0.46141
JU064208	6	2	3	2	18	0	1	32	0.612471	0.353438	0.433053	0.353512	1.06066	0	0.249796	0.437561
JU070921	1	3	5	6	1	2	14	32	0.25004	0.433113	0.55907	0.612301	0.250109	0.353484	0.93533	0.484778
JU065315	13	3	3	3	0	0	10	32	0.901398	0.433113	0.433053	0.432962	0	0	0.79046	0.427284
JU066554	0	1	0	0	0	0	31	32	0	0.249918	0	0	0	0	1.39187	0.234541
JU071565	11	2	4	3	1	1	10	32	0.829143	0.353438	0.500047	0.432962	0.250109	0.249951	0.79046	0.486587
JU071756	1	0	15	4	2	0	10	32	0.25004	0	0.968204	0.499942	0.353509	0	0.79046	0.408879
scaffold40	2	8	4	8	3	2	4	31	0.35361	0.707172	0.500047	0.707159	0.433039	0.353484	0.500016	0.507789
JU064309	2	3	9	6	3	4	4	31	0.35361	0.433113	0.75007	0.612301	0.433039	0.499995	0.500016	0.511735
scaffold533	0	5	7	1	1	1	16	31	0	0.559022	0.6615	0.249971	0.250109	0.249951	1.00003	0.424369
JU062687	0	0	0	0	3	0	28	31	0	0	0	0	0.433039	0	1.32292	0.250851
JU071708	0	12	8	10	1	0	0	31	0	0.865984	0.707173	0.790597	0.250109	0	0	0.373409
scaffold520	13	5	2	5	3	0	3	31	0.901398	0.559022	0.353587	0.558952	0.433039	0	0.433149	0.462735
JU067143	1	13	3	8	2	3	1	31	0.25004	0.901441	0.433053	0.707159	0.353509	0.433035	0.249796	0.475433
JU064227	0	0	0	3	0	0	28	31	0	0	0	0.432962	0	0	1.32292	0.25084
JU070233	0	5	4	13	3	2	4	31	0	0.559022	0.500047	0.901388	0.433039	0.353484	0.500016	0.463856
JU065905	4	2	5	14	2	0	4	31	0.50008	0.353438	0.55907	0.935407	0.353509	0	0.500016	0.45736
JU063146	3	3	13	7	3	1	1	31	0.433082	0.433113	0.90133	0.661504	0.433039	0.249951	0.249796	0.480259
scaffold583	0	2	0	0	2	3	24	31	0	0.353438	0	0	0.353509	0.433035	1.22478	0.337824
JU064423	0	0	0	2	0	0	29	31	0	0	0	0.353512	0	0	1.34629	0.24283
scaffold21	0	8	3	4	1	1	14	31	0	0.707172	0.433053	0.499942	0.250109	0.249951	0.93533	0.439365
JU062826	2	5	4	11	1	2	6	31	0.35361	0.559022	0.500047	0.829174	0.250109	0.353484	0.612218	0.493952
JU062683	0	6	12	7	5	1	0	31	0	0.612343	0.865958	0.661504	0.559009	0.249951	0	0.421252
JU063588	6	0	7	5	2	1	10	31	0.612471	0	0.6615	0.558952	0.353509	0.249951	0.79046	0.460977
JU064306	4	2	8	3	4	1	9	31	0.50008	0.353438	0.707173	0.432962	0.499937	0.249951	0.749953	0.499071
JU065913	0	2	5	1	5	1	17	31	0	0.353438	0.55907	0.249971	0.559009	0.249951	1.03076	0.428885
JU062718	0	2	28	0	0	0	1	31	0	0.353438	1.3229	0	0	0	0.249796	0.275162
contig3904	0	16	3	5	1	5	1	31	0	0.999987	0.433053	0.558952	0.250109	0.55899	0.249796	0.435841
JU067596	0	3	1	4	19	2	2	31	0	0.433113	0.250023	0.499942	1.08975	0.353484	0.353264	0.425653
JU066105	6	6	8	6	2	1	2	31	0.612471	0.612343	0.707173	0.612301	0.353509	0.249951	0.353264	0.500145
JU065643	0	0	0	0	0	0	31	31	0	0	0	0	0	0	1.39187	0.198839
JU066772	0	0	0	0	0	0	31	31	0	0	0	0	0	0	1.39187	0.198839
JU069952	0	0	0	0	0	0	31	31	0	0	0	0	0	0	1.39187	0.198839
JU062806	1	7	3	1	3	2	14	31	0.25004	0.66138	0.433053	0.249971	0.433039	0.353484	0.93533	0.473757
JU064580	0	5	11	1	9	3	2	31	0	0.559022	0.829079	0.249971	0.750045	0.433035	0.353264	0.453488
JU067174	17	2	3	5	2	0	2	31	1.03082	0.353438	0.433053	0.558952	0.353509	0	0.353264	0.440434
JU063769	3	0	12	5	6	3	2	31	0.433082	0	0.865958	0.558952	0.612409	0.433035	0.353264	0.465243
JU065024	13	2	4	2	4	0	6	31	0.901398	0.353438	0.500047	0.353512	0.499937	0	0.612218	0.460079
JU071611	5	4	4	3	3	0	11	30	0.559107	0.500046	0.500047	0.432962	0.433039	0	0.829246	0.464921
JU071652	5	13	4	2	2	1	3	30	0.559107	0.901441	0.500047	0.353512	0.353509	0.249951	0.433149	0.478674
JU065223	0	0	3	21	3	0	3	30	0	0	0.433053	1.14568	0.433039	0	0.433149	0.349274
JU065859	3	0	4	1	2	1	19	30	0.433082	0	0.500047	0.249971	0.353509	0.249951	1.08981	0.41091
JU067645	6	6	1	10	2	2	3	30	0.612471	0.612343	0.250023	0.790597	0.353509	0.353484	0.433149	0.486511
JU066133	9	4	4	5	1	0	7	30	0.749958	0.500046	0.500047	0.558952	0.250109	0	0.661539	0.460093
contig8651	25	3	0	1	1	0	0	30	1.25001	0.433113	0	0.249971	0.250109	0	0	0.311885
JU062761	0	6	0	2	3	0	19	30	0	0.612343	0	0.353512	0.433039	0	1.08981	0.355529
JU063035	0	1	7	7	7	0	8	30	0	0.249918	0.6615	0.661504	0.661407	0	0.707129	0.420208
JU068623	0	0	1	0	0	1	28	30	0	0	0.250023	0	0	0.249951	1.32292	0.260413
JU071417	0	12	6	9	3	0	0	30	0	0.865984	0.61243	0.750039	0.433039	0	0	0.380213
JU066003	18	1	5	6	0	0	0	30	1.06072	0.249918	0.55907	0.612301	0	0	0	0.354572
JU063738	0	5	8	2	5	2	8	30	0	0.559022	0.707173	0.353512	0.559009	0.353484	0.707129	0.462761
JU068084	0	7	3	4	2	7	7	30	0	0.66138	0.433053	0.499942	0.353509	0.661448	0.661539	0.467267
JU065703	0	3	5	4	1	3	14	30	0	0.433113	0.55907	0.499942	0.250109	0.433035	0.93533	0.444371
JU071719	0	5	7	1	6	2	9	30	0	0.559022	0.6615	0.249971	0.612409	0.353484	0.749953	0.455191
scaffold75	1	5	6	2	2	1	13	30	0.25004	0.559022	0.61243	0.353512	0.353509	0.249951	0.901357	0.468546
JU068015	0	0	0	0	0	0	30	30	0	0	0	0	0	0	1.36927	0.19561
JU068488	0	0	0	0	0	0	30	30	0	0	0	0	0	0	1.36927	0.19561
JU062777	0	7	7	1	1	0	14	30	0	0.66138	0.6615	0.249971	0.250109	0	0.93533	0.394041
scaffold41	0	9	16	1	2	2	0	30	0	0.750034	0.999965	0.249971	0.353509	0.353484	0	0.386709
JU066264	0	1	6	1	0	8	14	30	0	0.249918	0.61243	0.249971	0	0.707099	0.93533	0.393536
JU065858	10	6	2	3	0	0	9	30	0.790542	0.612343	0.353587	0.432962	0	0	0.749953	0.419913
JU062906	3	2	14	1	2	3	5	30	0.433082	0.353438	0.935365	0.249971	0.353509	0.433035	0.55894	0.473906
JU071267	0	5	4	3	7	1	10	30	0	0.559022	0.500047	0.432962	0.661407	0.249951	0.79046	0.456264
JU062684	0	5	6	8	1	5	4	29	0	0.559022	0.61243	0.707159	0.250109	0.55899	0.500016	0.455389
JU064687	0	6	6	8	4	2	3	29	0	0.612343	0.61243	0.707159	0.499937	0.353484	0.433149	0.459786
contig8701	28	0	0	1	0	0	0	29	1.3229	0	0	0.249971	0	0	0	0.224696
JU063436	3	2	5	5	2	1	11	29	0.433082	0.353438	0.55907	0.558952	0.353509	0.249951	0.829246	0.47675
JU068574	1	0	26	1	0	1	0	29	0.25004	0	1.27477	0.249971	0	0.249951	0	0.289248
JU069570	0	7	8	2	3	1	8	29	0	0.66138	0.707173	0.353512	0.433039	0.249951	0.707129	0.444598
JU066189	0	0	0	0	0	0	29	29	0	0	0	0	0	0	1.34629	0.192328
JU068554	2	7	7	5	3	1	4	29	0.35361	0.66138	0.6615	0.558952	0.433039	0.249951	0.500016	0.48835
JU071462	0	2	4	3	3	1	16	29	0	0.353438	0.500047	0.432962	0.433039	0.249951	1.00003	0.42421
JU063692	0	0	7	1	3	13	5	29	0	0	0.6615	0.249971	0.433039	0.901365	0.55894	0.400688
JU070555	0	3	5	3	3	1	14	29	0	0.433113	0.55907	0.432962	0.433039	0.249951	0.93533	0.434781
JU062839	3	1	6	5	5	0	9	29	0.433082	0.249918	0.61243	0.558952	0.559009	0	0.749953	0.451906
JU064776	0	7	6	6	5	1	4	29	0	0.66138	0.61243	0.612301	0.559009	0.249951	0.500016	0.456441
JU065175	10	6	4	1	0	3	5	29	0.790542	0.612343	0.500047	0.249971	0	0.433035	0.55894	0.449268
JU063937	0	0	1	0	2	0	26	29	0	0	0.250023	0	0.353509	0	1.27471	0.268321
JU071640	0	3	8	4	12	0	2	29	0	0.433113	0.707173	0.499942	0.865997	0	0.353264	0.408498
JU064364	12	6	6	1	2	1	1	29	0.866024	0.612343	0.61243	0.249971	0.353509	0.249951	0.249796	0.456289
JU065836	0	2	2	2	2	0	21	29	0	0.353438	0.353587	0.353512	0.353509	0	1.14563	0.365668
JU064816	9	1	3	6	2	0	8	29	0.749958	0.249918	0.433053	0.612301	0.353509	0	0.707129	0.443696
JU064240	8	2	2	6	4	0	7	29	0.707048	0.353438	0.353587	0.612301	0.499937	0	0.661539	0.455407
JU065960	0	1	0	0	2	0	26	29	0	0.249918	0	0	0.353509	0	1.27471	0.268306
JU066472	0	6	1	8	4	0	10	29	0	0.612343	0.250023	0.707159	0.499937	0	0.79046	0.40856
scaffold524	1	2	11	5	1	1	8	29	0.25004	0.353438	0.829079	0.558952	0.250109	0.249951	0.707129	0.456957
JU066041	0	2	10	4	2	1	10	29	0	0.353438	0.790644	0.499942	0.353509	0.249951	0.79046	0.433992
JU064732	2	1	14	4	7	0	1	29	0.35361	0.249918	0.935365	0.499942	0.661407	0	0.249796	0.421434
JU063032	8	2	3	6	4	0	6	29	0.707048	0.353438	0.433053	0.612301	0.499937	0	0.612218	0.459714
JU071727	0	3	10	8	0	4	3	28	0	0.433113	0.790644	0.707159	0	0.499995	0.433149	0.409151
JU071649	0	0	5	7	0	5	11	28	0	0	0.55907	0.661504	0	0.55899	0.829246	0.372687
JU069807	0	8	9	8	2	1	0	28	0	0.707172	0.75007	0.707159	0.353509	0.249951	0	0.395409
JU064474	1	0	2	2	3	1	19	28	0.25004	0	0.353587	0.353512	0.433039	0.249951	1.08981	0.389991
JU066849	0	5	8	2	1	0	12	28	0	0.559022	0.707173	0.353512	0.250109	0	0.866053	0.390838
scaffold460	1	3	5	6	2	8	3	28	0.25004	0.433113	0.55907	0.612301	0.353509	0.707099	0.433149	0.478326
JU070983	3	3	5	17	0	0	0	28	0.433082	0.433113	0.55907	1.03075	0	0	0	0.350859
JU070195	12	2	10	1	0	0	3	28	0.866024	0.353438	0.790644	0.249971	0	0	0.433149	0.384747
JU063646	0	0	0	0	0	0	28	28	0	0	0	0	0	0	1.32292	0.188988
JU063270	0	0	0	0	0	0	28	28	0	0	0	0	0	0	1.32292	0.188988
JU070334	0	0	0	0	0	0	28	28	0	0	0	0	0	0	1.32292	0.188988
JU071117	0	0	0	0	0	0	28	28	0	0	0	0	0	0	1.32292	0.188988
JU063115	0	0	28	0	0	0	0	28	0	0	1.3229	0	0	0	0	0.188986
JU069377	0	0	3	8	0	0	17	28	0	0	0.433053	0.707159	0	0	1.03076	0.310139
JU069841	3	4	2	4	2	1	12	28	0.433082	0.500046	0.353587	0.499942	0.353509	0.249951	0.866053	0.465167
JU066398	4	2	2	6	2	1	11	28	0.50008	0.353438	0.353587	0.612301	0.353509	0.249951	0.829246	0.464587
JU070642	0	6	4	0	5	9	4	28	0	0.612343	0.500047	0	0.559009	0.749976	0.500016	0.417342
JU064274	14	1	9	1	1	0	2	28	0.935434	0.249918	0.75007	0.249971	0.250109	0	0.353264	0.398395
JU064981	16	4	1	1	3	1	2	28	1.00004	0.500046	0.250023	0.249971	0.433039	0.249951	0.353264	0.433762
scaffold93	8	3	2	4	1	8	2	28	0.707048	0.433113	0.353587	0.499942	0.250109	0.707099	0.353264	0.472023
JU065174	9	5	1	3	4	1	5	28	0.749958	0.559022	0.250023	0.432962	0.499937	0.249951	0.55894	0.471542
JU069345	8	5	2	5	2	1	5	28	0.707048	0.559022	0.353587	0.558952	0.353509	0.249951	0.55894	0.477287
JU064644	19	2	3	0	2	0	2	28	1.08968	0.353438	0.433053	0	0.353509	0	0.353264	0.368992
JU062926	1	3	3	0	0	1	19	27	0.25004	0.433113	0.433053	0	0	0.249951	1.08981	0.350852
scaffold401	6	2	4	7	5	0	3	27	0.612471	0.353438	0.500047	0.661504	0.559009	0	0.433149	0.44566
scaffold374	4	5	7	5	3	0	3	27	0.50008	0.559022	0.6615	0.558952	0.433039	0	0.433149	0.449392
JU067318	4	9	2	2	2	1	7	27	0.50008	0.750034	0.353587	0.353512	0.353509	0.249951	0.661539	0.460316
JU066053	0	0	2	0	1	0	24	27	0	0	0.353587	0	0.250109	0	1.22478	0.261211
JU065735	0	3	5	6	5	1	7	27	0	0.433113	0.55907	0.612301	0.559009	0.249951	0.661539	0.439283
JU064570	0	5	0	9	5	5	3	27	0	0.559022	0	0.750039	0.559009	0.55899	0.433149	0.408601
JU069020	15	2	3	3	1	0	3	27	0.968276	0.353438	0.433053	0.432962	0.250109	0	0.433149	0.410141
JU068234	0	4	4	0	1	6	12	27	0	0.500046	0.500047	0	0.250109	0.612328	0.866053	0.389797
scaffold352	6	5	4	4	3	1	4	27	0.612471	0.559022	0.500047	0.499942	0.433039	0.249951	0.500016	0.479212
scaffold178	17	4	3	1	1	0	1	27	1.03082	0.500046	0.433053	0.249971	0.250109	0	0.249796	0.387685
JU069597	7	4	7	7	1	0	1	27	0.66136	0.500046	0.6615	0.661504	0.250109	0	0.249796	0.426331
JU063810	0	6	5	1	6	1	8	27	0	0.612343	0.55907	0.249971	0.612409	0.249951	0.707129	0.427268
JU063242	0	0	27	0	0	0	0	27	0	0	1.29906	0	0	0	0	0.18558
JU070576	0	0	27	0	0	0	0	27	0	0	1.29906	0	0	0	0	0.18558
JU065076	1	5	1	6	2	1	11	27	0.25004	0.559022	0.250023	0.612301	0.353509	0.249951	0.829246	0.443442
JU071255	3	8	2	2	5	2	5	27	0.433082	0.707172	0.353587	0.353512	0.559009	0.353484	0.55894	0.474112
JU065888	0	4	1	2	1	2	17	27	0	0.500046	0.250023	0.353512	0.250109	0.353484	1.03076	0.391133
JU065707	4	2	5	7	3	0	6	27	0.50008	0.353438	0.55907	0.661504	0.433039	0	0.612218	0.445621
JU068007	0	6	4	0	4	1	12	27	0	0.612343	0.500047	0	0.499937	0.249951	0.866053	0.389761
JU063640	0	0	0	0	1	0	26	27	0	0	0	0	0.250109	0	1.27471	0.217831
JU064310	2	4	8	4	6	1	2	27	0.35361	0.500046	0.707173	0.499942	0.612409	0.249951	0.353264	0.468057
JU065510	25	2	0	0	0	0	0	27	1.25001	0.353438	0	0	0	0	0	0.229063
JU069879	0	3	1	14	1	2	6	27	0	0.433113	0.250023	0.935407	0.250109	0.353484	0.612218	0.404908
JU066439	0	3	11	1	6	1	5	27	0	0.433113	0.829079	0.249971	0.612409	0.249951	0.55894	0.419066
JU067119	2	5	3	0	7	0	10	27	0.35361	0.559022	0.433053	0	0.661407	0	0.79046	0.39965
JU064774	8	7	5	4	3	0	0	27	0.707048	0.66138	0.55907	0.499942	0.433039	0	0	0.40864
JU062849	16	4	1	3	0	1	2	27	1.00004	0.500046	0.250023	0.432962	0	0.249951	0.353264	0.398041
JU071164	0	7	1	2	5	3	9	27	0	0.66138	0.250023	0.353512	0.559009	0.433035	0.749953	0.429559
JU065144	0	0	0	1	0	8	18	27	0	0	0	0.249971	0	0.707099	1.06059	0.288238
JU064202	0	2	0	0	2	10	13	27	0	0.353438	0	0	0.353509	0.790531	0.901357	0.342691
JU065317	2	2	12	6	0	0	5	27	0.35361	0.353438	0.865958	0.612301	0	0	0.55894	0.392035
JU071713	0	3	4	7	1	4	7	26	0	0.433113	0.500047	0.661504	0.250109	0.499995	0.661539	0.429472
JU071578	5	14	4	1	1	0	1	26	0.559107	0.935444	0.500047	0.249971	0.250109	0	0.249796	0.392068
JU064417	0	1	4	0	1	0	20	26	0	0.249918	0.500047	0	0.250109	0	1.11807	0.302592
JU071414	12	3	5	3	1	2	0	26	0.866024	0.433113	0.55907	0.432962	0.250109	0.353484	0	0.413537
JU064761	0	1	22	0	0	0	3	26	0	0.249918	1.1726	0	0	0	0.433149	0.265096
JU071724	17	0	7	1	0	0	1	26	1.03082	0	0.6615	0.249971	0	0	0.249796	0.313156
JU063884	0	0	0	0	1	0	25	26	0	0	0	0	0.250109	0	1.25	0.214301
JU066657	0	0	0	0	1	0	25	26	0	0	0	0	0.250109	0	1.25	0.214301
JU071641	2	2	5	1	5	3	8	26	0.35361	0.353438	0.55907	0.249971	0.559009	0.433035	0.707129	0.459323
JU070246	0	3	6	6	2	5	4	26	0	0.433113	0.61243	0.612301	0.353509	0.55899	0.500016	0.438623
JU064542	3	4	4	10	3	0	2	26	0.433082	0.500046	0.500047	0.790597	0.433039	0	0.353264	0.430011
JU067572	1	13	3	4	4	1	0	26	0.25004	0.901441	0.433053	0.499942	0.499937	0.249951	0	0.404909
JU062848	0	5	4	4	5	8	0	26	0	0.559022	0.500047	0.499942	0.559009	0.707099	0	0.403588
JU062803	0	6	1	2	3	6	8	26	0	0.612343	0.250023	0.353512	0.433039	0.612328	0.707129	0.424054
JU071113	0	3	0	0	0	1	22	26	0	0.433113	0	0	0	0.249951	1.17255	0.265088
scaffold90	6	4	1	4	5	4	2	26	0.612471	0.500046	0.250023	0.499942	0.559009	0.499995	0.353264	0.467821
JU068724	0	0	0	0	0	0	26	26	0	0	0	0	0	0	1.27471	0.182102
JU067225	21	1	2	2	0	0	0	26	1.14562	0.249918	0.353587	0.353512	0	0	0	0.300376
JU065079	1	2	3	2	0	1	17	26	0.25004	0.353438	0.433053	0.353512	0	0.249951	1.03076	0.381536
JU071290	4	6	6	3	4	2	1	26	0.50008	0.612343	0.61243	0.432962	0.499937	0.353484	0.249796	0.465862
JU062845	8	4	7	2	1	2	2	26	0.707048	0.500046	0.6615	0.353512	0.250109	0.353484	0.353264	0.454138
JU067644	0	7	0	0	6	3	10	26	0	0.66138	0	0	0.612409	0.433035	0.79046	0.356755
JU062937	0	6	3	4	10	2	1	26	0	0.612343	0.433053	0.499942	0.790558	0.353484	0.249796	0.419882
JU071227	10	6	3	2	3	0	2	26	0.790542	0.612343	0.433053	0.353512	0.433039	0	0.353264	0.425108
JU069311	0	2	14	1	3	0	6	26	0	0.353438	0.935365	0.249971	0.433039	0	0.612218	0.369147
JU070750	0	0	8	8	1	0	8	25	0	0	0.707173	0.707159	0.250109	0	0.707129	0.338796
JU064160	0	5	1	2	1	1	15	25	0	0.559022	0.250023	0.353512	0.250109	0.249951	0.968331	0.37585
JU063820	16	3	3	3	0	0	0	25	1.00004	0.433113	0.433053	0.432962	0	0	0	0.328452
JU065766	6	4	8	5	2	0	0	25	0.612471	0.500046	0.707173	0.558952	0.353509	0	0	0.390307
JU063136	0	0	1	0	0	9	15	25	0	0	0.250023	0	0	0.749976	0.968331	0.28119
JU065958	0	2	2	0	2	0	19	25	0	0.353438	0.353587	0	0.353509	0	1.08981	0.307192
JU068427	0	0	8	11	5	1	0	25	0	0	0.707173	0.829174	0.559009	0.249951	0	0.335044
JU065042	17	1	2	1	3	1	0	25	1.03082	0.249918	0.353587	0.249971	0.433039	0.249951	0	0.366756
JU071744	4	4	3	0	1	3	10	25	0.50008	0.500046	0.433053	0	0.250109	0.433035	0.79046	0.415255
JU063662	5	2	0	3	2	2	11	25	0.559107	0.353438	0	0.432962	0.353509	0.353484	0.829246	0.411678
JU064711	0	0	25	0	0	0	0	25	0	0	1.25001	0	0	0	0	0.178574
JU071643	0	3	1	0	0	8	13	25	0	0.433113	0.250023	0	0	0.707099	0.901357	0.32737
JU064799	18	4	0	0	2	0	1	25	1.06072	0.500046	0	0	0.353509	0	0.249796	0.309152
JU063428	11	3	2	1	4	0	4	25	0.829143	0.433113	0.353587	0.249971	0.499937	0	0.500016	0.409395
JU069945	4	5	4	4	3	0	5	25	0.50008	0.559022	0.500047	0.499942	0.433039	0	0.55894	0.435867
JU065944	23	0	2	0	0	0	0	25	1.19895	0	0.353587	0	0	0	0	0.221791
JU062673	0	0	0	0	0	0	25	25	0	0	0	0	0	0	1.25	0.178571
JU063214	0	0	0	0	0	0	25	25	0	0	0	0	0	0	1.25	0.178571
JU071671	0	0	0	0	0	0	25	25	0	0	0	0	0	0	1.25	0.178571
JU070081	0	1	6	7	0	6	5	25	0	0.249918	0.61243	0.661504	0	0.612328	0.55894	0.385017
JU065181	4	1	9	2	4	0	5	25	0.50008	0.249918	0.75007	0.353512	0.499937	0	0.55894	0.416065
JU063071	2	3	9	2	2	1	6	25	0.35361	0.433113	0.75007	0.353512	0.353509	0.249951	0.612218	0.443712
JU070699	0	9	2	11	1	0	2	25	0	0.750034	0.353587	0.829174	0.250109	0	0.353264	0.36231
JU065629	2	5	6	3	3	0	6	25	0.35361	0.559022	0.61243	0.432962	0.433039	0	0.612218	0.42904
JU063635	0	8	2	1	3	5	6	25	0	0.707172	0.353587	0.249971	0.433039	0.55899	0.612218	0.416425
JU062694	1	2	5	2	1	0	14	25	0.25004	0.353438	0.55907	0.353512	0.250109	0	0.93533	0.385928
JU069978	3	6	2	4	4	1	5	25	0.433082	0.612343	0.353587	0.499942	0.499937	0.249951	0.55894	0.458254
JU070041	0	2	5	4	2	7	5	25	0	0.353438	0.55907	0.499942	0.353509	0.661448	0.55894	0.426621
JU071746	1	4	6	6	5	1	2	25	0.25004	0.500046	0.61243	0.612301	0.559009	0.249951	0.353264	0.448149
JU062970	0	11	2	4	7	0	1	25	0	0.829138	0.353587	0.499942	0.661407	0	0.249796	0.370553
JU067654	4	6	5	5	2	1	2	25	0.50008	0.612343	0.55907	0.558952	0.353509	0.249951	0.353264	0.45531
JU068457	0	7	5	4	4	4	1	25	0	0.66138	0.55907	0.499942	0.499937	0.499995	0.249796	0.424303
JU066684	0	2	2	3	3	5	10	25	0	0.353438	0.353587	0.432962	0.433039	0.55899	0.79046	0.417497
JU066565	0	1	2	5	2	5	10	25	0	0.249918	0.353587	0.558952	0.353509	0.55899	0.79046	0.409345
JU064786	11	3	7	0	0	0	3	24	0.829143	0.433113	0.6615	0	0	0	0.433149	0.336701
JU064327	17	3	1	2	1	0	0	24	1.03082	0.433113	0.250023	0.353512	0.250109	0	0	0.331083
JU069567	0	7	8	2	1	3	3	24	0	0.66138	0.707173	0.353512	0.250109	0.433035	0.433149	0.40548
JU071073	0	3	8	12	0	1	0	24	0	0.433113	0.707173	0.866034	0	0.249951	0	0.322324
JU064304	1	6	2	1	1	2	11	24	0.25004	0.612343	0.353587	0.249971	0.250109	0.353484	0.829246	0.414111
JU068277	0	1	1	0	1	6	15	24	0	0.249918	0.250023	0	0.250109	0.612328	0.968331	0.332959
JU064330	0	2	3	1	3	4	11	24	0	0.353438	0.433053	0.249971	0.433039	0.499995	0.829246	0.39982
JU063198	2	7	5	4	3	0	3	24	0.35361	0.66138	0.55907	0.499942	0.433039	0	0.433149	0.420027
JU064184	0	0	0	0	0	0	24	24	0	0	0	0	0	0	1.22478	0.174969
JU066548	0	0	0	0	0	0	24	24	0	0	0	0	0	0	1.22478	0.174969
JU063047	0	0	9	13	2	0	0	24	0	0	0.75007	0.901388	0.353509	0	0	0.286424
JU068690	16	6	2	0	0	0	0	24	1.00004	0.612343	0.353587	0	0	0	0	0.280853
JU068144	4	5	2	4	5	0	4	24	0.50008	0.559022	0.353587	0.499942	0.559009	0	0.500016	0.424522
JU066103	0	3	15	0	3	3	0	24	0	0.433113	0.968204	0	0.433039	0.433035	0	0.323913
JU063586	8	4	7	4	1	0	0	24	0.707048	0.500046	0.6615	0.499942	0.250109	0	0	0.374092
JU064430	0	2	5	3	4	3	7	24	0	0.353438	0.55907	0.432962	0.499937	0.433035	0.661539	0.419997
JU067221	0	4	4	7	2	2	5	24	0	0.500046	0.500047	0.661504	0.353509	0.353484	0.55894	0.418218
JU068096	24	0	0	0	0	0	0	24	1.22474	0	0	0	0	0	0	0.174963
JU064731	0	13	6	2	1	0	2	24	0	0.901441	0.61243	0.353512	0.250109	0	0.353264	0.352965
JU063885	0	1	2	5	0	0	16	24	0	0.249918	0.353587	0.558952	0	0	1.00003	0.308927
JU066694	0	7	8	0	4	1	4	24	0	0.66138	0.707173	0	0.499937	0.249951	0.500016	0.374065
JU063477	11	3	1	6	2	1	0	24	0.829143	0.433113	0.250023	0.612301	0.353509	0.249951	0	0.38972
JU069411	0	2	3	0	9	1	9	24	0	0.353438	0.433053	0	0.750045	0.249951	0.749953	0.362349
JU063750	5	1	6	5	0	2	5	24	0.559107	0.249918	0.61243	0.558952	0	0.353484	0.55894	0.413262
JU068843	0	1	0	4	5	6	8	24	0	0.249918	0	0.499942	0.559009	0.612328	0.707129	0.375475
JU064629	4	0	1	5	4	1	9	24	0.50008	0	0.250023	0.558952	0.499937	0.249951	0.749953	0.401271
scaffold395	10	3	2	3	4	1	1	24	0.790542	0.433113	0.353587	0.432962	0.499937	0.249951	0.249796	0.429984
scaffold653	1	5	7	5	3	1	2	24	0.25004	0.559022	0.6615	0.558952	0.433039	0.249951	0.353264	0.437967
JU065852	22	1	0	0	0	0	1	24	1.17258	0.249918	0	0	0	0	0.249796	0.2389
JU064548	7	3	2	3	0	3	6	24	0.66136	0.433113	0.353587	0.432962	0	0.433035	0.612218	0.418039
JU071237	0	2	1	0	1	6	14	24	0	0.353438	0.250023	0	0.250109	0.612328	0.93533	0.343033
JU066576	0	4	1	1	2	10	6	24	0	0.500046	0.250023	0.249971	0.353509	0.790531	0.612218	0.393757
JU066892	0	7	3	6	2	0	6	24	0	0.66138	0.433053	0.612301	0.353509	0	0.612218	0.38178
JU063760	2	0	5	7	6	0	3	23	0.35361	0	0.55907	0.661504	0.612409	0	0.433149	0.374249
JU064898	18	3	1	0	1	0	0	23	1.06072	0.433113	0.250023	0	0.250109	0	0	0.284852
JU067972	0	4	2	1	1	4	11	23	0	0.500046	0.353587	0.249971	0.250109	0.499995	0.829246	0.383279
JU063904	0	0	2	1	1	8	11	23	0	0	0.353587	0.249971	0.250109	0.707099	0.829246	0.34143
JU065087	0	0	0	0	0	0	23	23	0	0	0	0	0	0	1.19904	0.171291
JU065135	0	0	0	0	0	0	23	23	0	0	0	0	0	0	1.19904	0.171291
JU063041	0	0	0	0	0	0	23	23	0	0	0	0	0	0	1.19904	0.171291
JU063262	1	4	4	0	1	1	12	23	0.25004	0.500046	0.500047	0	0.250109	0.249951	0.866053	0.373749
JU064065	3	2	8	6	1	0	3	23	0.433082	0.353438	0.707173	0.612301	0.250109	0	0.433149	0.398465
JU070331	0	0	2	0	1	0	20	23	0	0	0.353587	0	0.250109	0	1.11807	0.245966
scaffold364	2	8	1	7	0	0	5	23	0.35361	0.707172	0.250023	0.661504	0	0	0.55894	0.361607
JU071739	1	13	0	1	0	0	8	23	0.25004	0.901441	0	0.249971	0	0	0.707129	0.301226
JU066628	2	8	5	4	3	1	0	23	0.35361	0.707172	0.55907	0.499942	0.433039	0.249951	0	0.400398
JU067242	0	3	7	7	1	3	2	23	0	0.433113	0.6615	0.661504	0.250109	0.433035	0.353264	0.398932
JU071325	0	3	4	5	4	4	3	23	0	0.433113	0.500047	0.558952	0.499937	0.499995	0.433149	0.417885
JU071553	0	0	0	0	1	2	20	23	0	0	0	0	0.250109	0.353484	1.11807	0.245952
JU071131	2	0	7	4	0	2	8	23	0.35361	0	0.6615	0.499942	0	0.353484	0.707129	0.367952
JU070485	0	1	8	14	0	0	0	23	0	0.249918	0.707173	0.935407	0	0	0	0.270357
JU067341	0	13	3	5	2	0	0	23	0	0.901441	0.433053	0.558952	0.353509	0	0	0.320994
JU063418	0	3	0	1	9	5	5	23	0	0.433113	0	0.249971	0.750045	0.55899	0.55894	0.364437
JU071125	0	18	3	1	0	0	1	23	0	1.06071	0.433053	0.249971	0	0	0.249796	0.28479
JU065010	13	3	1	2	3	0	1	23	0.901398	0.433113	0.250023	0.353512	0.433039	0	0.249796	0.374412
JU064686	0	4	4	5	0	2	8	23	0	0.500046	0.500047	0.558952	0	0.353484	0.707129	0.374237
JU062788	0	1	7	9	0	1	5	23	0	0.249918	0.6615	0.750039	0	0.249951	0.55894	0.352907
JU070352	0	1	22	0	0	0	0	23	0	0.249918	1.1726	0	0	0	0	0.203218
JU066221	1	3	1	0	3	1	14	23	0.25004	0.433113	0.250023	0	0.433039	0.249951	0.93533	0.364499
JU064027	0	1	7	2	5	3	5	23	0	0.249918	0.6615	0.353512	0.559009	0.433035	0.55894	0.402273
JU066977	0	0	0	0	1	0	22	23	0	0	0	0	0.250109	0	1.17255	0.203237
JU069389	0	16	1	6	0	0	0	23	0	0.999987	0.250023	0.612301	0	0	0	0.266045
JU063046	0	0	0	0	0	1	22	23	0	0	0	0	0	0.249951	1.17255	0.203214
JU064335	1	7	1	6	4	0	4	23	0.25004	0.66138	0.250023	0.612301	0.499937	0	0.500016	0.396242
JU068753	0	2	1	1	0	6	13	23	0	0.353438	0.250023	0.249971	0	0.612328	0.901357	0.33816
JU064051	0	1	2	0	0	2	18	23	0	0.249918	0.353587	0	0	0.353484	1.06059	0.288226
JU064408	0	6	7	1	2	1	6	23	0	0.612343	0.6615	0.249971	0.353509	0.249951	0.612218	0.391356
JU065838	4	7	5	5	0	0	2	23	0.50008	0.66138	0.55907	0.558952	0	0	0.353264	0.376107
JU070192	2	6	4	0	7	2	2	23	0.35361	0.612343	0.500047	0	0.661407	0.353484	0.353264	0.404879
JU071655	5	8	1	0	0	4	4	22	0.559107	0.707172	0.250023	0	0	0.499995	0.500016	0.359473
JU068673	5	3	4	4	1	5	0	22	0.559107	0.433113	0.500047	0.499942	0.250109	0.55899	0	0.400187
JU063052	0	1	0	1	1	0	19	22	0	0.249918	0	0.249971	0.250109	0	1.08981	0.262829
JU064864	0	2	9	0	3	1	7	22	0	0.353438	0.75007	0	0.433039	0.249951	0.661539	0.34972
JU065070	0	3	1	10	5	3	0	22	0	0.433113	0.250023	0.790597	0.559009	0.433035	0	0.352254
JU065089	2	3	4	7	2	3	1	22	0.35361	0.433113	0.500047	0.661504	0.353509	0.433035	0.249796	0.426373
JU070595	1	3	3	2	0	1	12	22	0.25004	0.433113	0.433053	0.353512	0	0.249951	0.866053	0.369389
JU070319	1	1	0	0	2	3	15	22	0.25004	0.249918	0	0	0.353509	0.433035	0.968331	0.322119
JU069352	9	4	1	1	3	1	3	22	0.749958	0.500046	0.250023	0.249971	0.433039	0.249951	0.433149	0.409448
JU069433	0	0	4	9	0	5	4	22	0	0	0.500047	0.750039	0	0.55899	0.500016	0.32987
JU065899	0	1	0	0	0	2	19	22	0	0.249918	0	0	0	0.353484	1.08981	0.241887
JU071676	0	0	5	0	3	2	12	22	0	0	0.55907	0	0.433039	0.353484	0.866053	0.315949
JU069223	0	2	3	1	1	3	12	22	0	0.353438	0.433053	0.249971	0.250109	0.433035	0.866053	0.36938
JU069298	0	12	4	0	1	1	4	22	0	0.865984	0.500047	0	0.250109	0.249951	0.500016	0.338015
JU064369	5	2	0	1	2	0	12	22	0.559107	0.353438	0	0.249971	0.353509	0	0.866053	0.340297
JU067984	0	0	0	0	18	0	4	22	0	0	0	0	1.06066	0	0.500016	0.222953
JU071757	0	5	2	0	6	0	9	22	0	0.559022	0.353587	0	0.612409	0	0.749953	0.324996
JU062716	0	0	1	0	0	0	21	22	0	0	0.250023	0	0	0	1.14563	0.19938
JU066922	0	0	1	0	0	0	21	22	0	0	0.250023	0	0	0	1.14563	0.19938
JU064406	0	1	6	2	3	6	4	22	0	0.249918	0.61243	0.353512	0.433039	0.612328	0.500016	0.394463
JU071083	0	3	11	1	3	4	0	22	0	0.433113	0.829079	0.249971	0.433039	0.499995	0	0.349314
JU066023	1	1	6	1	5	3	5	22	0.25004	0.249918	0.61243	0.249971	0.559009	0.433035	0.55894	0.416192
JU063698	5	2	4	3	2	2	4	22	0.559107	0.353438	0.500047	0.432962	0.353509	0.353484	0.500016	0.43608
JU071753	0	1	7	1	8	0	5	22	0	0.249918	0.6615	0.249971	0.707116	0	0.55894	0.346778
JU065842	12	5	1	2	2	0	0	22	0.866024	0.559022	0.250023	0.353512	0.353509	0	0	0.340299
JU062858	15	4	0	0	1	0	2	22	0.968276	0.500046	0	0	0.250109	0	0.353264	0.295956
JU062703	0	0	0	0	5	0	17	22	0	0	0	0	0.559009	0	1.03076	0.227109
JU063312	1	4	5	1	2	3	6	22	0.25004	0.500046	0.55907	0.249971	0.353509	0.433035	0.612218	0.422555
JU065177	10	2	4	0	2	0	4	22	0.790542	0.353438	0.500047	0	0.353509	0	0.500016	0.356793
JU067246	0	3	2	4	3	0	10	22	0	0.433113	0.353587	0.499942	0.433039	0	0.79046	0.358591
JU068197	0	11	4	3	3	0	1	22	0	0.829138	0.500047	0.432962	0.433039	0	0.249796	0.349283
JU069087	0	1	3	10	3	3	2	22	0	0.249918	0.433053	0.790597	0.433039	0.433035	0.353264	0.384701
JU070945	0	0	0	0	0	0	22	22	0	0	0	0	0	0	1.17255	0.167507
JU071587	0	2	4	1	2	0	13	22	0	0.353438	0.500047	0.249971	0.353509	0	0.901357	0.336903
JU064064	8	0	9	3	0	1	1	22	0.707048	0	0.75007	0.432962	0	0.249951	0.249796	0.341404
JU062955	0	4	7	1	2	2	6	22	0	0.500046	0.6615	0.249971	0.353509	0.353484	0.612218	0.390104
JU067271	0	7	1	9	3	0	2	22	0	0.66138	0.250023	0.750039	0.433039	0	0.353264	0.349678
JU062854	0	2	3	1	1	1	14	22	0	0.353438	0.433053	0.249971	0.250109	0.249951	0.93533	0.353122
JU067456	2	5	11	1	1	0	2	22	0.35361	0.559022	0.829079	0.249971	0.250109	0	0.353264	0.370722
JU068893	0	6	0	3	10	2	1	22	0	0.612343	0	0.432962	0.790558	0.353484	0.249796	0.348449
scaffold154	2	2	1	1	5	1	10	22	0.35361	0.353438	0.250023	0.249971	0.559009	0.249951	0.79046	0.400923
JU068897	9	4	1	3	2	1	2	22	0.749958	0.500046	0.250023	0.432962	0.353509	0.249951	0.353264	0.412816
JU064522	7	1	1	5	2	0	6	22	0.66136	0.249918	0.250023	0.558952	0.353509	0	0.612218	0.383712
JU064232	4	3	0	1	2	0	11	21	0.50008	0.433113	0	0.249971	0.353509	0	0.829246	0.337988
JU064964	5	0	3	1	0	1	11	21	0.559107	0	0.433053	0.249971	0	0.249951	0.829246	0.331618
JU062874	0	4	4	7	3	3	0	21	0	0.500046	0.500047	0.661504	0.433039	0.433035	0	0.361096
JU065677	0	0	1	1	0	0	19	21	0	0	0.250023	0.249971	0	0	1.08981	0.227115
JU066181	0	0	6	9	1	1	4	21	0	0	0.61243	0.750039	0.250109	0.249951	0.500016	0.337506
JU063447	5	1	7	3	1	0	4	21	0.559107	0.249918	0.6615	0.432962	0.250109	0	0.500016	0.379087
JU065887	0	3	6	7	4	1	0	21	0	0.433113	0.61243	0.661504	0.499937	0.249951	0	0.350991
JU063282	15	0	5	1	0	0	0	21	0.968276	0	0.55907	0.249971	0	0	0	0.253902
JU064317	1	3	4	2	2	1	8	21	0.25004	0.433113	0.500047	0.353512	0.353509	0.249951	0.707129	0.406757
JU068216	0	3	5	6	3	0	4	21	0	0.433113	0.55907	0.612301	0.433039	0	0.500016	0.362505
JU068626	0	4	1	1	1	2	12	21	0	0.500046	0.250023	0.249971	0.250109	0.353484	0.866053	0.352812
scaffold189	2	4	2	3	2	0	8	21	0.35361	0.500046	0.353587	0.432962	0.353509	0	0.707129	0.385835
JU063303	3	3	3	5	4	3	0	21	0.433082	0.433113	0.433053	0.558952	0.499937	0.433035	0	0.398739
JU063843	0	4	10	2	0	0	5	21	0	0.500046	0.790644	0.353512	0	0	0.55894	0.314735
JU069021	17	0	1	1	1	0	1	21	1.03082	0	0.250023	0.249971	0.250109	0	0.249796	0.290103
JU071537	0	8	2	8	1	0	2	21	0	0.707172	0.353587	0.707159	0.250109	0	0.353264	0.338756
JU068126	0	1	0	3	1	0	16	21	0	0.249918	0	0.432962	0.250109	0	1.00003	0.276146
JU065445	6	3	4	5	1	0	2	21	0.612471	0.433113	0.500047	0.558952	0.250109	0	0.353264	0.386851
JU064986	3	1	4	6	3	0	4	21	0.433082	0.249918	0.500047	0.612301	0.433039	0	0.500016	0.389772
JU071758	4	0	7	4	0	1	5	21	0.50008	0	0.6615	0.499942	0	0.249951	0.55894	0.352916
JU070254	1	7	3	5	2	0	3	21	0.25004	0.66138	0.433053	0.558952	0.353509	0	0.433149	0.384298
JU069145	0	0	21	0	0	0	0	21	0	0	1.14564	0	0	0	0	0.163663
JU067710	0	0	0	0	0	0	21	21	0	0	0	0	0	0	1.14563	0.163662
JU068889	0	0	0	0	0	0	21	21	0	0	0	0	0	0	1.14563	0.163662
scaffold619	0	3	1	0	2	2	13	21	0	0.433113	0.250023	0	0.353509	0.353484	0.901357	0.327355
JU067877	0	8	2	0	1	8	2	21	0	0.707172	0.353587	0	0.250109	0.707099	0.353264	0.338747
JU064329	0	0	2	0	0	2	17	21	0	0	0.353587	0	0	0.353484	1.03076	0.248261
JU069855	21	0	0	0	0	0	0	21	1.14562	0	0	0	0	0	0	0.163659
JU064719	5	2	2	3	0	0	9	21	0.559107	0.353438	0.353587	0.432962	0	0	0.749953	0.349864
JU063280	0	3	0	0	0	4	14	21	0	0.433113	0	0	0	0.499995	0.93533	0.26692
JU068697	0	1	6	9	4	0	1	21	0	0.249918	0.61243	0.750039	0.499937	0	0.249796	0.337446
JU066506	0	2	2	3	0	2	12	21	0	0.353438	0.353587	0.432962	0	0.353484	0.866053	0.337075
JU065193	3	3	3	2	2	2	6	21	0.433082	0.433113	0.433053	0.353512	0.353509	0.353484	0.612218	0.424567
JU064971	1	5	7	3	3	0	2	21	0.25004	0.559022	0.6615	0.432962	0.433039	0	0.353264	0.384261
JU068150	0	1	3	0	3	0	14	21	0	0.249918	0.433053	0	0.433039	0	0.93533	0.293049
JU064754	11	4	1	2	1	0	2	21	0.829143	0.500046	0.250023	0.353512	0.250109	0	0.353264	0.3623
JU065965	0	0	4	3	0	0	14	21	0	0	0.500047	0.432962	0	0	0.93533	0.266906
JU062712	0	1	8	2	8	0	2	21	0	0.249918	0.707173	0.353512	0.707116	0	0.353264	0.338712
JU071749	0	4	0	3	5	3	6	21	0	0.500046	0	0.432962	0.559009	0.433035	0.612218	0.362467
JU069321	0	0	18	0	2	0	1	21	0	0	1.06064	0	0.353509	0	0.249796	0.237706
JU063957	0	1	4	0	2	0	14	21	0	0.249918	0.500047	0	0.353509	0	0.93533	0.291258
scaffold188	9	2	5	2	1	1	1	21	0.749958	0.353438	0.55907	0.353512	0.250109	0.249951	0.249796	0.395119
JU071368	0	2	3	1	2	8	5	21	0	0.353438	0.433053	0.249971	0.353509	0.707099	0.55894	0.37943
scaffold539	0	2	2	1	9	1	6	21	0	0.353438	0.353587	0.249971	0.750045	0.249951	0.612218	0.36703
JU071597	1	2	1	5	2	1	9	21	0.25004	0.353438	0.250023	0.558952	0.353509	0.249951	0.749953	0.395124
JU066028	7	1	8	3	0	0	2	21	0.66136	0.249918	0.707173	0.432962	0	0	0.353264	0.343526
JU064663	3	1	0	1	12	2	2	21	0.433082	0.249918	0	0.249971	0.865997	0.353484	0.353264	0.357959
JU065846	14	2	0	0	2	1	2	21	0.935434	0.353438	0	0	0.353509	0.249951	0.353264	0.320799
JU062794	4	3	1	1	1	3	7	20	0.50008	0.433113	0.250023	0.249971	0.250109	0.433035	0.661539	0.396839
JU069685	3	3	3	2	6	0	3	20	0.433082	0.433113	0.433053	0.353512	0.612409	0	0.433149	0.385474
JU063363	5	5	4	2	1	0	3	20	0.559107	0.559022	0.500047	0.353512	0.250109	0	0.433149	0.379278
JU069825	0	0	10	2	1	0	7	20	0	0	0.790644	0.353512	0.250109	0	0.661539	0.293686
JU062743	0	3	3	7	3	0	4	20	0	0.433113	0.433053	0.661504	0.433039	0	0.500016	0.351532
JU063450	0	4	4	3	6	0	3	20	0	0.500046	0.500047	0.432962	0.612409	0	0.433149	0.354088
JU062991	0	3	3	1	0	6	7	20	0	0.433113	0.433053	0.249971	0	0.612328	0.661539	0.341429
JU069903	12	3	0	2	0	0	3	20	0.866024	0.433113	0	0.353512	0	0	0.433149	0.297971
JU064297	6	3	3	1	5	2	0	20	0.612471	0.433113	0.433053	0.249971	0.559009	0.353484	0	0.3773
JU064578	0	1	6	5	1	0	7	20	0	0.249918	0.61243	0.558952	0.250109	0	0.661539	0.333278
JU062976	15	3	1	1	0	0	0	20	0.968276	0.433113	0.250023	0.249971	0	0	0	0.271626
JU062696	0	1	0	0	0	0	19	20	0	0.249918	0	0	0	0	1.08981	0.191389
JU068325	0	1	0	0	0	0	19	20	0	0.249918	0	0	0	0	1.08981	0.191389
JU062960	0	5	5	0	1	1	8	20	0	0.559022	0.55907	0	0.250109	0.249951	0.707129	0.332183
JU065814	2	0	4	4	2	1	7	20	0.35361	0	0.500047	0.499942	0.353509	0.249951	0.661539	0.374085
JU064461	6	8	3	1	0	1	1	20	0.612471	0.707172	0.433053	0.249971	0	0.249951	0.249796	0.357488
scaffold136	1	3	6	5	0	1	4	20	0.25004	0.433113	0.61243	0.558952	0	0.249951	0.500016	0.372072
JU062674	18	0	0	0	2	0	0	20	1.06072	0	0	0	0.353509	0	0	0.202032
JU070089	0	1	4	1	4	3	7	20	0	0.249918	0.500047	0.249971	0.499937	0.433035	0.661539	0.370635
JU063704	0	0	0	0	0	0	20	20	0	0	0	0	0	0	1.11807	0.159724
JU069630	0	0	0	0	0	0	20	20	0	0	0	0	0	0	1.11807	0.159724
JU064518	5	2	7	1	0	1	4	20	0.559107	0.353438	0.6615	0.249971	0	0.249951	0.500016	0.367712
JU064037	0	3	2	1	1	4	9	20	0	0.433113	0.353587	0.249971	0.250109	0.499995	0.749953	0.362389
JU064180	8	4	1	7	0	0	0	20	0.707048	0.500046	0.250023	0.661504	0	0	0	0.30266
JU068053	3	7	6	1	3	0	0	20	0.433082	0.66138	0.61243	0.249971	0.433039	0	0	0.341415
JU063482	2	1	4	1	3	1	8	20	0.35361	0.249918	0.500047	0.249971	0.433039	0.249951	0.707129	0.391952
JU063030	0	8	6	2	3	0	1	20	0	0.707172	0.61243	0.353512	0.433039	0	0.249796	0.336564
JU064469	0	4	4	1	7	0	4	20	0	0.500046	0.500047	0.249971	0.661407	0	0.500016	0.344498
JU063547	0	1	6	4	9	0	0	20	0	0.249918	0.61243	0.499942	0.750045	0	0	0.301762
JU065528	3	3	4	3	0	2	5	20	0.433082	0.433113	0.500047	0.432962	0	0.353484	0.55894	0.387375
JU067064	16	2	1	0	0	1	0	20	1.00004	0.353438	0.250023	0	0	0.249951	0	0.264779
JU066570	0	0	20	0	0	0	0	20	0	0	1.11802	0	0	0	0	0.159718
JU063018	0	1	0	3	3	1	12	20	0	0.249918	0	0.432962	0.433039	0.249951	0.866053	0.318846
JU062883	0	17	0	2	1	0	0	20	0	1.03074	0	0.353512	0.250109	0	0	0.233481
JU069147	3	4	5	3	4	0	1	20	0.433082	0.500046	0.55907	0.432962	0.499937	0	0.249796	0.382127
JU063117	4	12	1	0	1	1	1	20	0.50008	0.865984	0.250023	0	0.250109	0.249951	0.249796	0.337992
JU069859	0	2	6	2	5	5	0	20	0	0.353438	0.61243	0.353512	0.559009	0.55899	0	0.348197
JU063560	0	1	1	5	4	2	7	20	0	0.249918	0.250023	0.558952	0.499937	0.353484	0.661539	0.367693
JU063433	20	0	0	0	0	0	0	20	1.118	0	0	0	0	0	0	0.159714
JU063060	0	3	2	4	6	3	2	20	0	0.433113	0.353587	0.499942	0.612409	0.433035	0.353264	0.383621
JU065917	0	3	4	2	4	2	5	20	0	0.433113	0.500047	0.353512	0.499937	0.353484	0.55894	0.385576
JU063891	7	2	4	2	1	0	4	20	0.66136	0.353438	0.500047	0.353512	0.250109	0	0.500016	0.374069
JU065927	0	2	7	6	3	2	0	20	0	0.353438	0.6615	0.612301	0.433039	0.353484	0	0.344823
JU069598	6	2	2	4	1	3	2	20	0.612471	0.353438	0.353587	0.499942	0.250109	0.433035	0.353264	0.407978
JU070948	0	7	0	1	3	0	9	20	0	0.66138	0	0.249971	0.433039	0	0.749953	0.299192
JU063741	0	0	1	0	0	1	18	20	0	0	0.250023	0	0	0.249951	1.06059	0.222938
JU066082	11	2	5	0	0	1	1	20	0.829143	0.353438	0.55907	0	0	0.249951	0.249796	0.3202
scaffold636	0	2	10	2	0	0	6	20	0	0.353438	0.790644	0.353512	0	0	0.612218	0.301402
JU064524	0	1	1	0	3	1	14	20	0	0.249918	0.250023	0	0.433039	0.249951	0.93533	0.302609
JU063227	9	0	1	6	4	0	0	20	0.749958	0	0.250023	0.612301	0.499937	0	0	0.301746
JU063462	0	2	0	0	0	0	18	20	0	0.353438	0	0	0	0	1.06059	0.202005
scaffold206	2	6	0	3	2	1	6	20	0.35361	0.612343	0	0.432962	0.353509	0.249951	0.612218	0.373513
JU063045	0	2	1	3	3	1	10	20	0	0.353438	0.250023	0.432962	0.433039	0.249951	0.79046	0.358553
JU069313	6	3	3	1	2	1	3	19	0.612471	0.433113	0.433053	0.249971	0.353509	0.249951	0.433149	0.395031
JU063019	6	0	1	0	0	1	11	19	0.612471	0	0.250023	0	0	0.249951	0.829246	0.277384
JU064701	0	0	1	2	1	0	15	19	0	0	0.250023	0.353512	0.250109	0	0.968331	0.260282
JU066480	0	3	10	2	0	0	4	19	0	0.433113	0.790644	0.353512	0	0	0.500016	0.296755
JU066161	5	3	4	1	1	0	5	19	0.559107	0.433113	0.500047	0.249971	0.250109	0	0.55894	0.364469
JU064508	0	0	0	0	0	0	19	19	0	0	0	0	0	0	1.08981	0.155687
JU068514	0	0	0	0	0	0	19	19	0	0	0	0	0	0	1.08981	0.155687
JU068783	3	1	1	6	1	0	7	19	0.433082	0.249918	0.250023	0.612301	0.250109	0	0.661539	0.350996
JU063567	5	2	2	1	2	0	7	19	0.559107	0.353438	0.353587	0.249971	0.353509	0	0.661539	0.361593
JU064743	2	2	9	1	1	0	4	19	0.35361	0.353438	0.75007	0.249971	0.250109	0	0.500016	0.351031
JU065886	2	2	3	0	0	1	11	19	0.35361	0.353438	0.433053	0	0	0.249951	0.829246	0.317043
JU067799	16	0	3	0	0	0	0	19	1.00004	0	0.433053	0	0	0	0	0.204727
JU068073	0	5	2	7	3	2	0	19	0	0.559022	0.353587	0.661504	0.433039	0.353484	0	0.337234
JU065109	0	3	3	4	5	0	4	19	0	0.433113	0.433053	0.499942	0.559009	0	0.500016	0.346448
JU063563	1	3	8	0	0	2	5	19	0.25004	0.433113	0.707173	0	0	0.353484	0.55894	0.328964
JU066823	1	3	4	6	1	3	1	19	0.25004	0.433113	0.500047	0.612301	0.250109	0.433035	0.249796	0.389777
JU070673	0	5	5	8	0	0	1	19	0	0.559022	0.55907	0.707159	0	0	0.249796	0.296435
JU066535	2	1	2	5	5	1	3	19	0.35361	0.249918	0.353587	0.558952	0.559009	0.249951	0.433149	0.394025
JU070814	1	0	0	17	1	0	0	19	0.25004	0	0	1.03075	0.250109	0	0	0.2187
JU063504	13	5	0	1	0	0	0	19	0.901398	0.559022	0	0.249971	0	0	0	0.244341
JU066594	0	1	0	1	0	1	16	19	0	0.249918	0	0.249971	0	0.249951	1.00003	0.249982
JU064366	1	0	3	5	2	0	8	19	0.25004	0	0.433053	0.558952	0.353509	0	0.707129	0.328955
JU070865	0	5	1	5	4	1	3	19	0	0.559022	0.250023	0.558952	0.499937	0.249951	0.433149	0.364433
JU064775	2	4	6	2	4	0	1	19	0.35361	0.500046	0.61243	0.353512	0.499937	0	0.249796	0.367047
JU063975	0	0	7	1	1	0	10	19	0	0	0.6615	0.249971	0.250109	0	0.79046	0.278863
JU064994	1	6	3	4	2	3	0	19	0.25004	0.612343	0.433053	0.499942	0.353509	0.433035	0	0.368846
JU064181	1	0	1	0	4	0	13	19	0.25004	0	0.250023	0	0.499937	0	0.901357	0.271623
JU068044	4	3	4	3	2	1	2	19	0.50008	0.433113	0.500047	0.432962	0.353509	0.249951	0.353264	0.403275
scaffold108	1	2	2	4	2	0	8	19	0.25004	0.353438	0.353587	0.499942	0.353509	0	0.707129	0.359663
JU063352	0	6	5	4	4	0	0	19	0	0.612343	0.55907	0.499942	0.499937	0	0	0.310184
JU063849	1	2	2	2	4	0	8	19	0.25004	0.353438	0.353587	0.353512	0.499937	0	0.707129	0.359663
JU067156	0	0	2	1	2	1	13	19	0	0	0.353587	0.249971	0.353509	0.249951	0.901357	0.301196
JU065742	19	0	0	0	0	0	0	19	1.08968	0	0	0	0	0	0	0.155668
JU063022	0	9	3	3	2	1	1	19	0	0.750034	0.433053	0.432962	0.353509	0.249951	0.249796	0.352758
JU064651	3	1	2	2	1	4	6	19	0.433082	0.249918	0.353587	0.353512	0.250109	0.499995	0.612218	0.393203
scaffold423	3	1	4	1	3	1	6	19	0.433082	0.249918	0.500047	0.249971	0.433039	0.249951	0.612218	0.389747
scaffold140	5	6	3	2	0	1	2	19	0.559107	0.612343	0.433053	0.353512	0	0.249951	0.353264	0.36589
JU069418	2	0	0	0	2	1	14	19	0.35361	0	0	0	0.353509	0.249951	0.93533	0.270343
JU065674	6	6	1	3	0	1	2	19	0.612471	0.612343	0.250023	0.432962	0	0.249951	0.353264	0.358716
JU067518	0	0	1	14	1	1	2	19	0	0	0.250023	0.935407	0.250109	0.249951	0.353264	0.291251
JU069550	0	1	0	0	0	0	18	19	0	0.249918	0	0	0	0	1.06059	0.187216
scaffold329	0	5	7	3	2	0	2	19	0	0.559022	0.6615	0.432962	0.353509	0	0.353264	0.33718
scaffold302	7	4	3	2	1	0	2	19	0.66136	0.500046	0.433053	0.353512	0.250109	0	0.353264	0.364478
JU067544	0	6	1	3	3	0	6	19	0	0.612343	0.250023	0.432962	0.433039	0	0.612218	0.334369
JU065880	0	0	0	0	17	0	2	19	0	0	0	0	1.03075	0	0.353264	0.197716
JU063010	0	1	1	2	2	7	6	19	0	0.249918	0.250023	0.353512	0.353509	0.661448	0.612218	0.354376
JU067076	0	3	12	0	2	0	2	19	0	0.433113	0.865958	0	0.353509	0	0.353264	0.286549
JU064685	0	0	11	1	1	0	6	19	0	0	0.829079	0.249971	0.250109	0	0.612218	0.27734
JU062936	0	1	12	4	0	0	2	19	0	0.249918	0.865958	0.499942	0	0	0.353264	0.281298
JU071494	5	3	1	7	2	0	0	18	0.559107	0.433113	0.250023	0.661504	0.353509	0	0	0.322465
JU066322	0	9	1	0	1	0	7	18	0	0.750034	0.250023	0	0.250109	0	0.661539	0.273101
JU069648	0	3	8	2	1	0	4	18	0	0.433113	0.707173	0.353512	0.250109	0	0.500016	0.32056
JU066357	9	3	1	1	1	0	3	18	0.749958	0.433113	0.250023	0.249971	0.250109	0	0.433149	0.338046
scaffold677	0	4	4	5	1	1	3	18	0	0.500046	0.500047	0.558952	0.250109	0.249951	0.433149	0.356036
JU064823	4	3	6	3	2	0	0	18	0.50008	0.433113	0.61243	0.432962	0.353509	0	0	0.333156
JU064269	1	3	4	2	8	0	0	18	0.25004	0.433113	0.500047	0.353512	0.707116	0	0	0.320547
JU063199	0	4	0	0	3	3	8	18	0	0.500046	0	0	0.433039	0.433035	0.707129	0.296178
JU065328	3	5	2	0	4	1	3	18	0.433082	0.559022	0.353587	0	0.499937	0.249951	0.433149	0.361247
JU063893	18	0	0	0	0	0	0	18	1.06072	0	0	0	0	0	0	0.151531
contig5701	18	0	0	0	0	0	0	18	1.06072	0	0	0	0	0	0	0.151531
JU071705	18	0	0	0	0	0	0	18	1.06072	0	0	0	0	0	0	0.151531
scaffold588	0	3	4	4	2	2	3	18	0	0.433113	0.500047	0.499942	0.353509	0.353484	0.433149	0.367606
JU064113	1	0	4	4	0	2	7	18	0.25004	0	0.500047	0.499942	0	0.353484	0.661539	0.323579
JU064985	1	8	2	5	1	1	0	18	0.25004	0.707172	0.353587	0.558952	0.250109	0.249951	0	0.338544
JU063697	0	3	9	2	3	0	1	18	0	0.433113	0.75007	0.353512	0.433039	0	0.249796	0.317076
JU066517	0	2	1	0	3	1	11	18	0	0.353438	0.250023	0	0.433039	0.249951	0.829246	0.302243
JU066179	4	4	2	0	6	1	1	18	0.50008	0.500046	0.353587	0	0.612409	0.249951	0.249796	0.352267
JU063162	4	3	6	1	2	1	1	18	0.50008	0.433113	0.61243	0.249971	0.353509	0.249951	0.249796	0.378407
JU064569	3	4	5	1	0	0	5	18	0.433082	0.500046	0.55907	0.249971	0	0	0.55894	0.32873
JU065233	0	0	1	1	0	0	16	18	0	0	0.250023	0.249971	0	0	1.00003	0.214289
JU070055	0	1	2	0	3	0	12	18	0	0.249918	0.353587	0	0.433039	0	0.866053	0.2718
JU067549	0	0	2	0	16	0	0	18	0	0	0.353587	0	1.00001	0	0	0.193371
JU064193	2	4	1	10	0	0	1	18	0.35361	0.500046	0.250023	0.790597	0	0	0.249796	0.306296
JU071621	0	1	1	0	0	0	16	18	0	0.249918	0.250023	0	0	0	1.00003	0.214282
JU067190	11	1	4	1	1	0	0	18	0.829143	0.249918	0.500047	0.249971	0.250109	0	0	0.297027
JU065470	2	9	1	3	1	1	1	18	0.35361	0.750034	0.250023	0.432962	0.250109	0.249951	0.249796	0.362355
JU069226	0	0	1	6	1	2	8	18	0	0	0.250023	0.612301	0.250109	0.353484	0.707129	0.310435
JU070616	0	4	0	1	3	1	9	18	0	0.500046	0	0.249971	0.433039	0.249951	0.749953	0.311851
JU066337	0	0	18	0	0	0	0	18	0	0	1.06064	0	0	0	0	0.15152
JU071709	1	1	0	1	3	3	9	18	0.25004	0.249918	0	0.249971	0.433039	0.433035	0.749953	0.337994
JU066925	0	1	1	0	0	3	13	18	0	0.249918	0.250023	0	0	0.433035	0.901357	0.262048
JU071188	0	6	1	0	6	0	5	18	0	0.612343	0.250023	0	0.612409	0	0.55894	0.290531
scaffold194	3	4	1	2	6	0	2	18	0.433082	0.500046	0.250023	0.353512	0.612409	0	0.353264	0.357477
JU065608	0	6	5	5	2	0	0	18	0	0.612343	0.55907	0.558952	0.353509	0	0	0.297696
JU065115	1	5	3	1	2	1	5	18	0.25004	0.559022	0.433053	0.249971	0.353509	0.249951	0.55894	0.379212
JU071689	0	1	2	1	0	1	13	18	0	0.249918	0.353587	0.249971	0	0.249951	0.901357	0.286398
JU062973	0	2	0	0	7	1	8	18	0	0.353438	0	0	0.661407	0.249951	0.707129	0.281704
JU063206	11	1	2	2	1	0	1	18	0.829143	0.249918	0.353587	0.353512	0.250109	0	0.249796	0.326581
JU069285	0	1	2	4	3	3	5	18	0	0.249918	0.353587	0.499942	0.433039	0.433035	0.55894	0.361209
JU065451	7	1	7	1	1	0	1	18	0.66136	0.249918	0.6615	0.249971	0.250109	0	0.249796	0.331808
JU065638	0	0	0	0	0	0	18	18	0	0	0	0	0	0	1.06059	0.151513
JU067116	0	0	0	0	0	0	18	18	0	0	0	0	0	0	1.06059	0.151513
JU065195	11	1	4	0	0	1	1	18	0.829143	0.249918	0.500047	0	0	0.249951	0.249796	0.296979
JU063895	4	1	5	1	3	2	2	18	0.50008	0.249918	0.55907	0.249971	0.433039	0.353484	0.353264	0.385547
JU066124	0	4	2	4	5	2	1	18	0	0.500046	0.353587	0.499942	0.559009	0.353484	0.249796	0.359409
JU067917	0	2	1	0	5	1	9	18	0	0.353438	0.250023	0	0.559009	0.249951	0.749953	0.308911
JU063617	0	1	2	1	0	0	14	18	0	0.249918	0.353587	0.249971	0	0	0.93533	0.255544
JU065816	1	4	4	5	2	0	2	18	0.25004	0.500046	0.500047	0.558952	0.353509	0	0.353264	0.359408
JU065785	9	1	1	6	0	1	0	18	0.749958	0.249918	0.250023	0.612301	0	0.249951	0	0.301736
JU071304	0	2	3	2	5	5	1	18	0	0.353438	0.433053	0.353512	0.559009	0.55899	0.249796	0.358257
JU065987	0	10	0	1	2	3	2	18	0	0.790576	0	0.249971	0.353509	0.433035	0.353264	0.311479
JU071572	0	2	7	2	0	1	6	18	0	0.353438	0.6615	0.353512	0	0.249951	0.612218	0.31866
JU067052	0	2	4	4	1	1	6	18	0	0.353438	0.500047	0.499942	0.250109	0.249951	0.612218	0.352244
JU065713	4	2	1	2	7	0	2	18	0.50008	0.353438	0.250023	0.353512	0.661407	0	0.353264	0.353104
JU065145	4	2	1	3	5	1	2	18	0.50008	0.353438	0.250023	0.432962	0.559009	0.249951	0.353264	0.385533
JU071069	10	2	0	3	0	1	2	18	0.790542	0.353438	0	0.432962	0	0.249951	0.353264	0.311451
JU063628	0	3	0	1	3	3	7	17	0	0.433113	0	0.249971	0.433039	0.433035	0.661539	0.315814
scaffold190	6	4	1	0	2	1	3	17	0.612471	0.500046	0.250023	0	0.353509	0.249951	0.433149	0.342735
JU063501	0	3	4	3	3	1	3	17	0	0.433113	0.500047	0.432962	0.433039	0.249951	0.433149	0.354609
JU068520	0	0	0	0	1	1	15	17	0	0	0	0	0.250109	0.249951	0.968331	0.20977
JU062862	5	3	0	1	3	1	4	17	0.559107	0.433113	0	0.249971	0.433039	0.249951	0.500016	0.346457
JU066055	0	2	10	0	1	1	3	17	0	0.353438	0.790644	0	0.250109	0.249951	0.433149	0.296756
JU066150	0	4	4	0	1	0	8	17	0	0.500046	0.500047	0	0.250109	0	0.707129	0.279619
JU065090	2	4	4	0	3	0	4	17	0.35361	0.500046	0.500047	0	0.433039	0	0.500016	0.32668
JU064826	6	3	3	3	2	0	0	17	0.612471	0.433113	0.433053	0.432962	0.353509	0	0	0.323587
JU063506	2	8	3	1	1	2	0	17	0.35361	0.707172	0.433053	0.249971	0.250109	0.353484	0	0.335343
JU066076	0	3	4	5	2	0	3	17	0	0.433113	0.500047	0.558952	0.353509	0	0.433149	0.325538
JU067646	0	4	1	0	3	6	3	17	0	0.500046	0.250023	0	0.433039	0.612328	0.433149	0.318369
JU063898	0	0	0	2	0	0	15	17	0	0	0	0.353512	0	0	0.968331	0.188835
JU064892	0	2	3	7	2	0	3	17	0	0.353438	0.433053	0.661504	0.353509	0	0.433149	0.319236
JU062913	0	3	0	6	0	1	7	17	0	0.433113	0	0.612301	0	0.249951	0.661539	0.279558
JU063113	3	1	3	1	1	4	4	17	0.433082	0.249918	0.433053	0.249971	0.250109	0.499995	0.500016	0.373735
JU071258	0	1	7	9	0	0	0	17	0	0.249918	0.6615	0.750039	0	0	0	0.237351
JU068990	0	1	0	1	0	4	11	17	0	0.249918	0	0.249971	0	0.499995	0.829246	0.261304
JU071619	4	0	4	5	0	0	4	17	0.50008	0	0.500047	0.558952	0	0	0.500016	0.294156
JU063700	3	3	1	0	1	3	6	17	0.433082	0.433113	0.250023	0	0.250109	0.433035	0.612218	0.344511
JU064660	3	0	5	0	3	1	5	17	0.433082	0	0.55907	0	0.433039	0.249951	0.55894	0.319154
JU070789	0	1	4	1	1	2	8	17	0	0.249918	0.500047	0.249971	0.250109	0.353484	0.707129	0.330094
JU064465	0	0	0	1	0	4	12	17	0	0	0	0.249971	0	0.499995	0.866053	0.23086
JU064397	0	1	3	1	4	1	7	17	0	0.249918	0.433053	0.249971	0.499937	0.249951	0.661539	0.33491
JU069467	0	1	0	0	0	0	16	17	0	0.249918	0	0	0	0	1.00003	0.178564
JU068336	1	1	0	6	1	0	8	17	0.25004	0.249918	0	0.612301	0.250109	0	0.707129	0.295643
JU065901	0	1	4	3	5	0	4	17	0	0.249918	0.500047	0.432962	0.559009	0	0.500016	0.320279
JU066571	0	0	0	0	0	0	17	17	0	0	0	0	0	0	1.03076	0.147251
JU067387	0	0	0	0	0	0	17	17	0	0	0	0	0	0	1.03076	0.147251
JU070544	0	0	0	0	0	0	17	17	0	0	0	0	0	0	1.03076	0.147251
JU070579	0	0	0	0	0	0	17	17	0	0	0	0	0	0	1.03076	0.147251
JU065160	13	1	1	2	0	0	0	17	0.901398	0.249918	0.250023	0.353512	0	0	0	0.250693
JU071090	0	4	4	5	4	0	0	17	0	0.500046	0.500047	0.558952	0.499937	0	0	0.29414
JU063402	0	3	4	6	1	2	1	17	0	0.433113	0.500047	0.612301	0.250109	0.353484	0.249796	0.342693
JU065562	13	1	0	3	0	0	0	17	0.901398	0.249918	0	0.432962	0	0	0	0.226326
JU068092	13	1	0	3	0	0	0	17	0.901398	0.249918	0	0.432962	0	0	0	0.226326
JU066117	5	4	0	2	0	0	6	17	0.559107	0.500046	0	0.353512	0	0	0.612218	0.289269
JU067379	2	3	3	3	3	1	2	17	0.35361	0.433113	0.433053	0.432962	0.433039	0.249951	0.353264	0.384142
JU065323	3	0	3	2	3	0	6	17	0.433082	0	0.433053	0.353512	0.433039	0	0.612218	0.323558
JU066274	1	2	1	5	8	0	0	17	0.25004	0.353438	0.250023	0.558952	0.707116	0	0	0.302796
JU065229	1	2	7	4	1	1	1	17	0.25004	0.353438	0.6615	0.499942	0.250109	0.249951	0.249796	0.359254
JU063058	0	1	16	0	0	0	0	17	0	0.249918	0.999965	0	0	0	0	0.178555
JU068435	3	6	1	0	0	6	1	17	0.433082	0.612343	0.250023	0	0	0.612328	0.249796	0.308225
JU071207	0	2	2	2	1	1	9	17	0	0.353438	0.353587	0.353512	0.250109	0.249951	0.749953	0.330078
JU071461	12	2	0	1	2	0	0	17	0.866024	0.353438	0	0.249971	0.353509	0	0	0.26042
JU063126	1	2	2	9	0	2	1	17	0.25004	0.353438	0.353587	0.750039	0	0.353484	0.249796	0.330055
JU064303	1	1	3	0	3	3	6	17	0.25004	0.249918	0.433053	0	0.433039	0.433035	0.612218	0.344472
JU070282	0	2	4	0	2	0	9	17	0	0.353438	0.500047	0	0.353509	0	0.749953	0.279564
JU067996	0	2	1	3	2	1	8	17	0	0.353438	0.250023	0.432962	0.353509	0.249951	0.707129	0.335288
JU062967	0	3	1	1	0	2	10	17	0	0.433113	0.250023	0.249971	0	0.353484	0.79046	0.296722
JU064999	4	1	3	6	2	0	1	17	0.50008	0.249918	0.433053	0.612301	0.353509	0	0.249796	0.342665
scaffold80	0	5	0	2	3	6	1	17	0	0.559022	0	0.353512	0.433039	0.612328	0.249796	0.315385
JU062818	7	2	3	2	0	3	0	17	0.66136	0.353438	0.433053	0.353512	0	0.433035	0	0.3192
JU063326	3	2	2	4	5	0	1	17	0.433082	0.353438	0.353587	0.499942	0.559009	0	0.249796	0.349836
scaffold298	0	1	4	5	2	0	5	17	0	0.249918	0.500047	0.558952	0.353509	0	0.55894	0.317338
JU064586	0	7	5	2	1	0	2	17	0	0.66138	0.55907	0.353512	0.250109	0	0.353264	0.311048
JU070980	9	2	2	2	1	0	1	17	0.749958	0.353438	0.353587	0.353512	0.250109	0	0.249796	0.330057
JU070209	0	0	1	6	0	9	1	17	0	0	0.250023	0.612301	0	0.749976	0.249796	0.266014
JU065180	0	2	0	7	0	2	6	17	0	0.353438	0	0.661504	0	0.353484	0.612218	0.282949
JU067904	0	5	4	4	0	2	2	17	0	0.559022	0.500047	0.499942	0	0.353484	0.353264	0.32368
JU064093	0	6	1	1	4	3	2	17	0	0.612343	0.250023	0.249971	0.499937	0.433035	0.353264	0.342653
JU067146	0	2	2	2	2	3	6	17	0	0.353438	0.353587	0.353512	0.353509	0.433035	0.612218	0.351328
scaffold79	6	1	0	1	1	0	7	16	0.612471	0.249918	0	0.249971	0.250109	0	0.661539	0.289144
JU063474	0	0	3	1	1	0	11	16	0	0	0.433053	0.249971	0.250109	0	0.829246	0.251768
JU064688	5	2	2	0	0	0	7	16	0.559107	0.353438	0.353587	0	0	0	0.661539	0.275381
JU068043	0	6	2	0	1	0	7	16	0	0.612343	0.353587	0	0.250109	0	0.661539	0.268225
JU064305	1	0	2	0	2	0	11	16	0.25004	0	0.353587	0	0.353509	0	0.829246	0.255197
JU064478	1	0	2	0	1	0	12	16	0.25004	0	0.353587	0	0.250109	0	0.866053	0.245684
JU065187	1	4	3	0	4	1	3	16	0.25004	0.500046	0.433053	0	0.499937	0.249951	0.433149	0.338025
JU066790	11	3	1	0	1	0	0	16	0.829143	0.433113	0.250023	0	0.250109	0	0	0.25177
JU070952	0	1	9	2	0	1	3	16	0	0.249918	0.75007	0.353512	0	0.249951	0.433149	0.290943
JU069644	0	1	0	0	0	0	15	16	0	0.249918	0	0	0	0	0.968331	0.174036
JU068913	0	2	4	2	1	0	7	16	0	0.353438	0.500047	0.353512	0.250109	0	0.661539	0.302664
JU064838	0	4	1	4	3	1	3	16	0	0.500046	0.250023	0.499942	0.433039	0.249951	0.433149	0.338021
scaffold353	3	0	1	3	5	1	3	16	0.433082	0	0.250023	0.432962	0.559009	0.249951	0.433149	0.336882
JU063396	1	1	3	2	2	0	7	16	0.25004	0.249918	0.433053	0.353512	0.353509	0	0.661539	0.328796
contig5875	16	0	0	0	0	0	0	16	1.00004	0	0	0	0	0	0	0.142863
JU068142	16	0	0	0	0	0	0	16	1.00004	0	0	0	0	0	0	0.142863
JU071566	0	0	0	0	0	0	16	16	0	0	0	0	0	0	1.00003	0.142862
JU063721	0	0	0	0	0	0	16	16	0	0	0	0	0	0	1.00003	0.142862
JU066488	0	0	0	0	0	0	16	16	0	0	0	0	0	0	1.00003	0.142862
JU068464	0	0	0	0	0	0	16	16	0	0	0	0	0	0	1.00003	0.142862
JU070572	0	0	0	0	0	0	16	16	0	0	0	0	0	0	1.00003	0.142862
JU070818	0	0	0	0	0	0	16	16	0	0	0	0	0	0	1.00003	0.142862
JU065857	9	1	1	0	1	1	3	16	0.749958	0.249918	0.250023	0	0.250109	0.249951	0.433149	0.311873
JU071697	6	4	0	0	0	1	5	16	0.612471	0.500046	0	0	0	0.249951	0.55894	0.274487
JU064236	1	3	5	0	2	0	5	16	0.25004	0.433113	0.55907	0	0.353509	0	0.55894	0.30781
JU063461	0	0	0	0	3	1	12	16	0	0	0	0	0.433039	0.249951	0.866053	0.221292
scaffold238	0	0	0	0	3	1	12	16	0	0	0	0	0.433039	0.249951	0.866053	0.221292
JU065579	0	0	2	5	1	0	8	16	0	0	0.353587	0.558952	0.250109	0	0.707129	0.267111
JU063731	1	1	2	2	3	3	4	16	0.25004	0.249918	0.353587	0.353512	0.433039	0.433035	0.500016	0.367592
JU065930	6	1	1	0	3	0	5	16	0.612471	0.249918	0.250023	0	0.433039	0	0.55894	0.300627
scaffold117	9	3	2	2	0	0	0	16	0.749958	0.433113	0.353587	0.353512	0	0	0	0.270024
JU069155	0	1	2	0	0	1	12	16	0	0.249918	0.353587	0	0	0.249951	0.866053	0.245644
JU062795	0	2	6	0	0	4	4	16	0	0.353438	0.61243	0	0	0.499995	0.500016	0.28084
JU066169	9	3	1	1	2	0	0	16	0.749958	0.433113	0.250023	0.249971	0.353509	0	0	0.290939
JU066816	0	5	6	0	0	0	5	16	0	0.559022	0.61243	0	0	0	0.55894	0.247199
JU065527	0	4	2	1	0	0	9	16	0	0.500046	0.353587	0.249971	0	0	0.749953	0.264794
JU062834	0	3	1	3	4	1	4	16	0	0.433113	0.250023	0.432962	0.499937	0.249951	0.500016	0.338
JU066406	1	1	8	5	0	1	0	16	0.25004	0.249918	0.707173	0.558952	0	0.249951	0	0.288005
JU066320	0	2	1	4	2	0	7	16	0	0.353438	0.250023	0.499942	0.353509	0	0.661539	0.302636
JU069006	0	3	1	4	0	3	5	16	0	0.433113	0.250023	0.499942	0	0.433035	0.55894	0.310722
JU063515	0	12	1	2	1	0	0	16	0	0.865984	0.250023	0.353512	0.250109	0	0	0.245661
JU063602	0	2	4	0	2	0	8	16	0	0.353438	0.500047	0	0.353509	0	0.707129	0.273446
JU064792	0	2	2	1	1	2	8	16	0	0.353438	0.353587	0.249971	0.250109	0.353484	0.707129	0.32396
JU062714	0	1	0	1	2	0	12	16	0	0.249918	0	0.249971	0.353509	0	0.866053	0.245636
scaffold541	0	2	4	3	1	2	4	16	0	0.353438	0.500047	0.432962	0.250109	0.353484	0.500016	0.341437
JU064076	1	6	4	1	3	0	1	16	0.25004	0.612343	0.500047	0.249971	0.433039	0	0.249796	0.327891
scaffold23	0	0	16	0	0	0	0	16	0	0	0.999965	0	0	0	0	0.142852
JU068628	0	0	16	0	0	0	0	16	0	0	0.999965	0	0	0	0	0.142852
JU066667	0	3	11	2	0	0	0	16	0	0.433113	0.829079	0.353512	0	0	0	0.230815
JU065942	0	1	2	0	0	0	13	16	0	0.249918	0.353587	0	0	0	0.901357	0.21498
JU067332	11	4	0	0	0	0	1	16	0.829143	0.500046	0	0	0	0	0.249796	0.225569
JU064266	0	2	3	6	1	4	0	16	0	0.353438	0.433053	0.612301	0.250109	0.499995	0	0.306985
JU071738	1	1	0	1	0	0	13	16	0.25004	0.249918	0	0.249971	0	0	0.901357	0.235898
JU064665	0	0	1	0	1	0	14	16	0	0	0.250023	0	0.250109	0	0.93533	0.205066
JU064362	8	1	5	2	0	0	0	16	0.707048	0.249918	0.55907	0.353512	0	0	0	0.267078
JU067333	0	2	2	3	3	2	4	16	0	0.353438	0.353587	0.432962	0.433039	0.353484	0.500016	0.346647
JU066039	0	0	0	1	1	0	14	16	0	0	0	0.249971	0.250109	0	0.93533	0.205059
scaffold2	0	0	3	0	0	3	10	16	0	0	0.433053	0	0	0.433035	0.79046	0.23665
JU062989	0	1	0	3	2	2	8	16	0	0.249918	0	0.432962	0.353509	0.353484	0.707129	0.299572
contig5438	11	0	0	1	1	2	1	16	0.829143	0	0	0.249971	0.250109	0.353484	0.249796	0.276072
JU064625	0	1	3	1	5	1	5	16	0	0.249918	0.433053	0.249971	0.559009	0.249951	0.55894	0.328692
JU064290	1	3	4	4	2	0	2	16	0.25004	0.433113	0.500047	0.499942	0.353509	0	0.353264	0.341416
JU063803	0	0	13	3	0	0	0	16	0	0	0.90133	0.432962	0	0	0	0.190613
JU066620	9	2	0	2	3	0	0	16	0.749958	0.353438	0	0.353512	0.433039	0	0	0.269992
JU069314	0	6	2	5	1	1	1	16	0	0.612343	0.353587	0.558952	0.250109	0.249951	0.249796	0.324962
JU065088	5	0	1	2	2	4	2	16	0.559107	0	0.250023	0.353512	0.353509	0.499995	0.353264	0.338487
JU064989	0	2	3	1	2	3	5	16	0	0.353438	0.433053	0.249971	0.353509	0.433035	0.55894	0.340278
JU065673	2	1	5	5	1	0	2	16	0.35361	0.249918	0.55907	0.558952	0.250109	0	0.353264	0.332132
scaffold227	0	1	10	1	2	0	2	16	0	0.249918	0.790644	0.249971	0.353509	0	0.353264	0.285329
JU065972	0	3	2	6	1	2	2	16	0	0.433113	0.353587	0.612301	0.250109	0.353484	0.353264	0.336551
JU064778	0	6	5	0	1	2	2	16	0	0.612343	0.55907	0	0.250109	0.353484	0.353264	0.304039
JU071328	0	2	2	4	3	0	5	16	0	0.353438	0.353587	0.499942	0.433039	0	0.55894	0.314135
scaffold674	0	5	3	5	1	0	2	16	0	0.559022	0.433053	0.558952	0.250109	0	0.353264	0.307771
scaffold624	11	0	0	2	1	0	2	16	0.829143	0	0	0.353512	0.250109	0	0.353264	0.255147
JU066931	0	1	4	2	3	4	2	16	0	0.249918	0.500047	0.353512	0.433039	0.499995	0.353264	0.341396
JU064111	0	5	4	5	0	0	2	16	0	0.559022	0.500047	0.558952	0	0	0.353264	0.281612
JU064787	0	2	4	2	3	3	2	16	0	0.353438	0.500047	0.353512	0.433039	0.433035	0.353264	0.346619
JU069796	1	6	3	4	0	0	2	16	0.25004	0.612343	0.433053	0.499942	0	0	0.353264	0.306949
JU064120	0	2	3	2	1	2	6	16	0	0.353438	0.433053	0.353512	0.250109	0.353484	0.612218	0.336545
JU067777	7	4	0	1	2	0	2	16	0.66136	0.500046	0	0.249971	0.353509	0	0.353264	0.302593
JU071262	3	2	1	3	4	1	2	16	0.433082	0.353438	0.250023	0.432962	0.499937	0.249951	0.353264	0.367523

## Sheet: Q-tests
									ascending ordering							Xn-Xn-1						X7-X1
SeqID	2Cell	Moru.	Troc.	19Vel.	58Vel.	74Vel.	144Pl.		X1	X2	X3	X4	X5	X6	X7																outliers at 90% confidence (0.507)							outliers at 95% confidence (0.568)							outliers at 99% confidence (0.680)
JU063545	31419	54169	28084	36423	42372	18321	10716		10716	18321	28084	31419	36423	42372	54169	7605	9763	3335	5004	5949	11797	43453		0.175017	0.22468	0.0767496	0.115159	0.136907	0.271489		0	0	0	0	0	0		0	0	0	0	0	0		0	0	0	0	0
JU064608	31985	41541	20012	33932	31001	15297	9744		9744	15297	20012	31001	31985	33932	41541	5553	4715	10989	984	1947	7609	31797		0.174639	0.148284	0.345599	0.0309463	0.0612322	0.239299		0	0	0	0	0	0		0	0	0	0	0	0		0	0	0	0	0
JU064611	18189	23606	12925	18847	19384	12252	4122		4122	12252	12925	18189	18847	19384	23606	8130	673	5264	658	537	4222	19484		0.417265	0.0345412	0.27017	0.0337713	0.0275611	0.216691		0	0	0	0	0	0		0	0	0	0	0	0		0	0	0	0	0
JU071714	25	11249	17055	26769	19161	24101	11676		25	11249	11676	17055	19161	24101	26769	11224	427	5379	2106	4940	2668	26744		0.419683	0.0159662	0.201129	0.0787466	0.184714	0.0997607		0	0	0	0	0	0		0	0	0	0	0	0		0	0	0	0	0
JU064609	2569	25461	10738	24260	17690	9492	6375		2569	6375	9492	10738	17690	24260	25461	3806	3117	1246	6952	6570	1201	22892		0.166259	0.136161	0.0544295	0.303687	0.287	0.0524637		0	0	0	0	0	0		0	0	0	0	0	0		0	0	0	0	0
JU071754	9634	22020	13313	23369	16933	5385	3960		3960	5385	9634	13313	16933	22020	23369	1425	4249	3679	3620	5087	1349	19409		0.0734195	0.218919	0.189551	0.186511	0.262095	0.0695038		0	0	0	0	0	0		0	0	0	0	0	0		0	0	0	0	0
JU063890	2826	7988	33411	12873	3798	10889	8444		2826	3798	7988	8444	10889	12873	33411	972	4190	456	2445	1984	20538	30585		0.0317803	0.136995	0.0149093	0.0799411	0.0648684	0.671506		0	0	0	0	0	1		0	0	0	0	0	1		0	0	0	0	0
JU063381	8940	16575	10325	14754	14928	8146	8142		8142	8146	8940	10325	14754	14928	16575	4	794	1385	4429	174	1647	8433		0.000474327	0.0941539	0.164236	0.525199	0.0206332	0.195304		0	0	0	1	0	0		0	0	0	0	0	0		0	0	0	0	0
JU063200	0	299	291	231	133	1346	39563		0	133	231	291	299	1346	39563	133	98	60	8	1047	38217	39563		0.00336173	0.00247706	0.00151657	0.000202209	0.0264641	0.965978		0	0	0	0	0	1		0	0	0	0	0	1		0	0	0	0	0
JU063900	33707	9753	6632	11420	8778	2962	1354		1354	2962	6632	8778	9753	11420	33707	1608	3670	2146	975	1667	22287	32353		0.0497017	0.113436	0.0663308	0.0301363	0.0515254	0.68887		0	0	0	0	0	1		0	0	0	0	0	1		0	0	0	0	0
JU071628	20656	11578	6243	11453	9224	4375	1855		1855	4375	6243	9224	11453	11578	20656	2520	1868	2981	2229	125	9078	18801		0.134035	0.0993564	0.158555	0.118558	0.00664858	0.482847		0	0	0	0	0	0		0	0	0	0	0	0		0	0	0	0	0
JU071629	8549	12736	9133	11361	13861	5870	4461		4461	5870	8549	9133	11361	12736	13861	1409	2679	584	2228	1375	1125	9400		0.149894	0.285	0.0621277	0.237021	0.146277	0.119681		0	0	0	0	0	0		0	0	0	0	0	0		0	0	0	0	0
JU071577	29956	8586	5369	7624	6773	4308	574		574	4308	5369	6773	7624	8586	29956	3734	1061	1404	851	962	21370	29382		0.127085	0.0361105	0.0477844	0.0289633	0.0327411	0.727316		0	0	0	0	0	1		0	0	0	0	0	1		0	0	0	0	0
JU064489	25	4906	7483	7690	6283	21273	10306		25	4906	6283	7483	7690	10306	21273	4881	1377	1200	207	2616	10967	21248		0.229716	0.0648061	0.0564759	0.00974209	0.123117	0.516143		0	0	0	0	0	1		0	0	0	0	0	0		0	0	0	0	0
JU065621	0	9305	10471	10958	11318	15820	1825		0	1825	9305	10471	10958	11318	15820	1825	7480	1166	487	360	4502	15820		0.11536	0.472819	0.0737042	0.0307838	0.022756	0.284576		0	0	0	0	0	0		0	0	0	0	0	0		0	0	0	0	0
JU062677	1952	4667	2453	3894	6728	4443	14341		1952	2453	3894	4443	4667	6728	14341	501	1441	549	224	2061	7613	12389		0.0404391	0.116313	0.0443135	0.0180806	0.166357	0.614497		0	0	0	0	0	1		0	0	0	0	0	1		0	0	0	0	0
JU064614	12100	6941	5102	6931	5971	3366	3136		3136	3366	5102	5971	6931	6941	12100	230	1736	869	960	10	5159	8964		0.0256582	0.193664	0.0969433	0.107095	0.00111557	0.575524		0	0	0	0	0	1		0	0	0	0	0	1		0	0	0	0	0
JU071627	10841	7958	3450	5677	3654	1817	1590		1590	1817	3450	3654	5677	7958	10841	227	1633	204	2023	2281	2883	9251		0.0245379	0.176521	0.0220517	0.218679	0.246568	0.311642		0	0	0	0	0	0		0	0	0	0	0	0		0	0	0	0	0
JU070508	0	4039	8503	10826	11140	5385	721		0	721	4039	5385	8503	10826	11140	721	3318	1346	3118	2323	314	11140		0.0647217	0.297846	0.120826	0.279892	0.208528	0.0281867		0	0	0	0	0	0		0	0	0	0	0	0		0	0	0	0	0
JU062954	4932	8586	4251	4225	9892	3298	1384		1384	3298	4225	4251	4932	8586	9892	1914	927	26	681	3654	1306	8508		0.224965	0.108956	0.00305595	0.0800423	0.429478	0.153503		0	0	0	0	0	0		0	0	0	0	0	0		0	0	0	0	0
JU071733	2106	5505	6486	7096	4990	3904	1987		1987	2106	3904	4990	5505	6486	7096	119	1798	1086	515	981	610	5109		0.0232922	0.351928	0.212566	0.100803	0.192014	0.119397		0	0	0	0	0	0		0	0	0	0	0	0		0	0	0	0	0
JU065894	16309	3848	2388	1701	2490	1660	382		382	1660	1701	2388	2490	3848	16309	1278	41	687	102	1358	12461	15927		0.0802411	0.00257424	0.0431343	0.00640422	0.085264	0.782382		0	0	0	0	0	1		0	0	0	0	0	1		0	0	0	0	0
JU063675	256	2154	5296	4984	3787	8280	5227		256	2154	3787	4984	5227	5296	8280	1898	1633	1197	243	69	2984	8024		0.23654	0.203514	0.149177	0.0302841	0.0085992	0.371884		0	0	0	0	0	0		0	0	0	0	0	0		0	0	0	0	0
JU062878	539	1675	9754	1056	2138	5049	5006		539	1056	1675	2138	5006	5049	9754	517	619	463	2868	43	4705	9215		0.0561042	0.0671731	0.0502442	0.311232	0.0046663	0.510581		0	0	0	0	0	1		0	0	0	0	0	0		0	0	0	0	0
JU063815	13102	4906	1725	2871	2138	202	58		58	202	1725	2138	2871	4906	13102	144	1523	413	733	2035	8196	13044		0.0110396	0.116759	0.0316621	0.0561944	0.15601	0.628335		0	0	0	0	0	1		0	0	0	0	0	1		0	0	0	0	0
JU062744	6140	5295	3717	3960	3163	740	1604		740	1604	3163	3717	3960	5295	6140	864	1559	554	243	1335	845	5400		0.16	0.288704	0.102593	0.045	0.247222	0.156481		0	0	0	0	0	0		0	0	0	0	0	0		0	0	0	0	0
JU071651	1361	3769	3231	3531	4277	4241	4270		1361	3231	3531	3769	4241	4270	4277	1870	300	238	472	29	7	2916		0.641289	0.102881	0.0816187	0.161866	0.00994513	0.00240055		1	0	0	0	0	0		1	0	0	0	0	0		0	0	0	0	0
JU071642	1464	4876	4737	6172	6862	4914	500		500	1464	4737	4876	4914	6172	6862	964	3273	139	38	1258	690	6362		0.151525	0.514461	0.0218485	0.00597296	0.197737	0.108456		0	1	0	0	0	0		0	0	0	0	0	0		0	0	0	0	0
JU063248	0	1406	1141	957	1648	25043	4240		0	957	1141	1406	1648	4240	25043	957	184	265	242	2592	20803	25043		0.0382143	0.00734736	0.0105818	0.00966338	0.103502	0.830691		0	0	0	0	0	1		0	0	0	0	0	1		0	0	0	0	0
JU063064	0	1017	17808	66	178	202	279		0	66	178	202	279	1017	17808	66	112	24	77	738	16791	17808		0.0037062	0.00628931	0.00134771	0.0043239	0.041442	0.942891		0	0	0	0	0	1		0	0	0	0	0	1		0	0	0	0	0
JU071586	3596	5206	3231	5677	3966	2423	603		603	2423	3231	3596	3966	5206	5677	1820	808	365	370	1240	471	5074		0.358691	0.159243	0.0719354	0.0729208	0.244383	0.0928262		0	0	0	0	0	0		0	0	0	0	0	0		0	0	0	0	0
JU071718	0	2513	680	1584	2495	15484	4976		0	680	1584	2495	2513	4976	15484	680	904	911	18	2463	10508	15484		0.0439163	0.0583828	0.0588349	0.00116249	0.159067	0.678636		0	0	0	0	0	1		0	0	0	0	0	1		0	0	0	0	0
JU071604	4703	2359	3252	3980	2200	3441	2368		2200	2359	2368	3252	3441	3980	4703	159	9	884	189	539	723	2503		0.0635238	0.00359569	0.353176	0.0755094	0.215342	0.288853		0	0	0	0	0	0		0	0	0	0	0	0		0	0	0	0	0
JU062711	0	179	121	66	0	875	10984		0	0	66	121	179	875	10984	0	66	55	58	696	10109	10984		0	0.00600874	0.00500728	0.00528041	0.0633649	0.920339		0	0	0	0	0	1		0	0	0	0	0	1		0	0	0	0	0
JU063868	0	2393	3547	4489	2718	5251	3754		0	2393	2718	3547	3754	4489	5251	2393	325	829	207	735	762	5251		0.455723	0.061893	0.157875	0.0394211	0.139973	0.145115		0	0	0	0	0	0		0	0	0	0	0	0		0	0	0	0	0
JU071571	0	2603	1214	825	1737	20667	3342		0	825	1214	1737	2603	3342	20667	825	389	523	866	739	17325	20667		0.0399187	0.0188223	0.025306	0.0419025	0.0357575	0.838293		0	0	0	0	0	1		0	0	0	0	0	1		0	0	0	0	0
JU062707	873	5355	3765	5677	5080	1211	839		839	873	1211	3765	5080	5355	5677	34	338	2554	1315	275	322	4838		0.0070277	0.0698636	0.527904	0.271807	0.0568417	0.0665564		0	0	1	0	0	0		0	0	0	0	0	0		0	0	0	0	0
JU064610	7553	3889	2308	1947	2673	1952	412		412	1947	1952	2308	2673	3889	7553	1535	5	356	365	1216	3664	7141		0.214956	0.000700182	0.049853	0.0511133	0.170284	0.513093		0	0	0	0	0	1		0	0	0	0	0	0		0	0	0	0	0
JU070507	0	1017	534	594	1336	4847	6979		0	534	594	1017	1336	4847	6979	534	60	423	319	3511	2132	6979		0.0765153	0.00859722	0.0606104	0.0457086	0.503081	0.305488		0	0	0	0	0	0		0	0	0	0	0	0		0	0	0	0	0
JU065561	205	59	14771	66	89	538	250		59	66	89	205	250	538	14771	7	23	116	45	288	14233	14712		0.000475802	0.00156335	0.00788472	0.00305873	0.0195759	0.967442		0	0	0	0	0	1		0	0	0	0	0	1		0	0	0	0	0
JU068166	3417	2872	3012	5083	3342	1413	530		530	1413	2872	3012	3342	3417	5083	883	1459	140	330	75	1666	4553		0.193938	0.320448	0.030749	0.0724797	0.0164727	0.365913		0	0	0	0	0	0		0	0	0	0	0	0		0	0	0	0	0
JU068929	0	2543	5320	8615	1158	807	368		0	368	807	1158	2543	5320	8615	368	439	351	1385	2777	3295	8615		0.0427162	0.0509576	0.0407429	0.160766	0.322345	0.382472		0	0	0	0	0	0		0	0	0	0	0	0		0	0	0	0	0
JU066089	0	149	0	99	267	538	8819		0	0	99	149	267	538	8819	0	99	50	118	271	8281	8819		0	0.0112258	0.00566958	0.0133802	0.0307291	0.938995		0	0	0	0	0	1		0	0	0	0	0	1		0	0	0	0	0
JU071614	1670	2483	3887	3531	1737	2760	1604		1604	1670	1737	2483	2760	3531	3887	66	67	746	277	771	356	2283		0.0289093	0.0293473	0.326763	0.121332	0.337714	0.155935		0	0	0	0	0	0		0	0	0	0	0	0		0	0	0	0	0
JU062725	6294	3829	2040	2871	1381	67	14		14	67	1381	2040	2871	3829	6294	53	1314	659	831	958	2465	6280		0.00843949	0.209236	0.104936	0.132325	0.152548	0.392516		0	0	0	0	0	0		0	0	0	0	0	0		0	0	0	0	0
JU071663	9120	2513	971	1683	802	0	412		0	412	802	971	1683	2513	9120	412	390	169	712	830	6607	9120		0.0451754	0.0427632	0.0185307	0.0780702	0.0910088	0.724452		0	0	0	0	0	1		0	0	0	0	0	1		0	0	0	0	0
JU063676	51	1735	2332	2310	2495	6126	2665		51	1735	2310	2332	2495	2665	6126	1684	575	22	163	170	3461	6075		0.277202	0.0946502	0.0036214	0.0268313	0.0279835	0.569712		0	0	0	0	0	1		0	0	0	0	0	1		0	0	0	0	0
JU062742	1387	2812	2478	3498	2718	1817	1604		1387	1604	1817	2478	2718	2812	3498	217	213	661	240	94	686	2111		0.102795	0.1009	0.313122	0.11369	0.0445287	0.324964		0	0	0	0	0	0		0	0	0	0	0	0		0	0	0	0	0
JU063249	0	1316	656	693	1916	8819	3946		0	656	693	1316	1916	3946	8819	656	37	623	600	2030	4873	8819		0.0743849	0.00419549	0.0706429	0.0680349	0.230185	0.552557		0	0	0	0	0	1		0	0	0	0	0	0		0	0	0	0	0
scaffold118	1926	4099	1967	3399	2718	1683	589		589	1683	1926	1967	2718	3399	4099	1094	243	41	751	681	700	3510		0.311681	0.0692308	0.0116809	0.21396	0.194017	0.19943		0	0	0	0	0	0		0	0	0	0	0	0		0	0	0	0	0
JU071669	0	598	218	330	490	5520	5698		0	218	330	490	598	5520	5698	218	112	160	108	4922	178	5698		0.038259	0.019656	0.02808	0.018954	0.863812	0.031239		0	0	0	0	1	0		0	0	0	0	1	0		0	0	0	0	1
JU062819	0	418	72	297	802	6597	5374		0	72	297	418	802	5374	6597	72	225	121	384	4572	1223	6597		0.0109141	0.0341064	0.0183417	0.0582083	0.693042	0.185387		0	0	0	0	1	0		0	0	0	0	1	0		0	0	0	0	1
JU062709	0	209	97	132	623	403	6728		0	97	132	209	403	623	6728	97	35	77	194	220	6105	6728		0.0144174	0.00520214	0.0114447	0.0288347	0.0326992	0.907402		0	0	0	0	0	1		0	0	0	0	0	1		0	0	0	0	0
JU063888	770	1795	2113	3597	1515	2490	1987		770	1515	1795	1987	2113	2490	3597	745	280	192	126	377	1107	2827		0.26353	0.0990449	0.0679165	0.0445702	0.133357	0.391581		0	0	0	0	0	0		0	0	0	0	0	0		0	0	0	0	0
JU071568	282	2453	4567	5050	1292	1817	0		0	282	1292	1817	2453	4567	5050	282	1010	525	636	2114	483	5050		0.0558416	0.2	0.10396	0.125941	0.418614	0.0956436		0	0	0	0	0	0		0	0	0	0	0	0		0	0	0	0	0
JU066903	0	149	24	99	89	336	6846		0	24	89	99	149	336	6846	24	65	10	50	187	6510	6846		0.0035057	0.0094946	0.00146071	0.00730353	0.0273152	0.95092		0	0	0	0	0	1		0	0	0	0	0	1		0	0	0	0	0
JU062704	2081	2722	1725	3597	2317	942	544		544	942	1725	2081	2317	2722	3597	398	783	356	236	405	875	3053		0.130364	0.256469	0.116607	0.077301	0.132656	0.286603		0	0	0	0	0	0		0	0	0	0	0	0		0	0	0	0	0
JU062793	1747	3141	2526	2937	2629	1077	206		206	1077	1747	2526	2629	2937	3141	871	670	779	103	308	204	2935		0.296763	0.228279	0.265417	0.0350937	0.10494	0.069506		0	0	0	0	0	0		0	0	0	0	0	0		0	0	0	0	0
JU063378	719	1136	6924	363	445	740	986		363	445	719	740	986	1136	6924	82	274	21	246	150	5788	6561		0.0124981	0.0417619	0.00320073	0.0374943	0.0228624	0.882183		0	0	0	0	0	1		0	0	0	0	0	1		0	0	0	0	0
JU062872	9120	867	510	726	401	134	147		134	147	401	510	726	867	9120	13	254	109	216	141	8253	8986		0.00144669	0.0282662	0.01213	0.0240374	0.0156911	0.918429		0	0	0	0	0	1		0	0	0	0	0	1		0	0	0	0	0
JU071596	179	1406	1676	2541	2183	1548	2532		179	1406	1548	1676	2183	2532	2541	1227	142	128	507	349	9	2362		0.519475	0.0601185	0.0541914	0.214649	0.147756	0.00381033		1	0	0	0	0	0		0	0	0	0	0	0		0	0	0	0	0
JU063621	0	2872	2089	2244	2629	6664	441		0	441	2089	2244	2629	2872	6664	441	1648	155	385	243	3792	6664		0.0661765	0.247299	0.0232593	0.0577731	0.0364646	0.569028		0	0	0	0	0	1		0	0	0	0	0	1		0	0	0	0	0
JU063624	0	2064	2891	1749	3208	3904	927		0	927	1749	2064	2891	3208	3904	927	822	315	827	317	696	3904		0.237449	0.210553	0.0806865	0.211834	0.0811988	0.178279		0	0	0	0	0	0		0	0	0	0	0	0		0	0	0	0	0
JU062908	0	2004	2842	4390	1069	2894	721		0	721	1069	2004	2842	2894	4390	721	348	935	838	52	1496	4390		0.164237	0.0792711	0.212984	0.190888	0.0118451	0.340774		0	0	0	0	0	0		0	0	0	0	0	0		0	0	0	0	0
JU063088	0	89	10422	0	0	0	0		0	0	0	0	0	89	10422	0	0	0	0	89	10333	10422		0	0	0	0	0.00853963	0.99146		0	0	0	0	0	1		0	0	0	0	0	1		0	0	0	0	0
JU062685	0	89	0	66	0	67	6257		0	0	0	66	67	89	6257	0	0	66	1	22	6168	6257		0	0	0.0105482	0.000159821	0.00351606	0.985776		0	0	0	0	0	1		0	0	0	0	0	1		0	0	0	0	0
JU065255	873	2393	2332	2640	2183	1211	971		873	971	1211	2183	2332	2393	2640	98	240	972	149	61	247	1767		0.0554612	0.135823	0.550085	0.0843237	0.0345218	0.139785		0	0	1	0	0	0		0	0	0	0	0	0		0	0	0	0	0
JU071702	873	2303	1360	2145	2272	2087	1546		873	1360	1546	2087	2145	2272	2303	487	186	541	58	127	31	1430		0.340559	0.13007	0.378322	0.0405594	0.0888112	0.0216783		0	0	0	0	0	0		0	0	0	0	0	0		0	0	0	0	0
JU063942	0	2752	2769	2409	2762	4779	88		0	88	2409	2752	2762	2769	4779	88	2321	343	10	7	2010	4779		0.0184139	0.485666	0.0717723	0.00209249	0.00146474	0.42059		0	0	0	0	0	0		0	0	0	0	0	0		0	0	0	0	0
JU063625	488	2094	2672	2244	3074	3231	441		441	488	2094	2244	2672	3074	3231	47	1606	150	428	402	157	2790		0.0168459	0.575627	0.0537634	0.153405	0.144086	0.0562724		0	1	0	0	0	0		0	1	0	0	0	0		0	0	0	0	0
JU066557	0	389	437	759	2584	6059	3092		0	389	437	759	2584	3092	6059	389	48	322	1825	508	2967	6059		0.064202	0.0079221	0.0531441	0.301205	0.0838422	0.489685		0	0	0	0	0	0		0	0	0	0	0	0		0	0	0	0	0
contig7500	5600	1765	1093	1221	1648	202	132		132	202	1093	1221	1648	1765	5600	70	891	128	427	117	3835	5468		0.0128018	0.162948	0.0234089	0.0780907	0.0213972	0.701353		0	0	0	0	0	1		0	0	0	0	0	1		0	0	0	0	0
scaffold1	77	359	8406	33	44	202	515		33	44	77	202	359	515	8406	11	33	125	157	156	7891	8373		0.00131375	0.00394124	0.0149289	0.0187507	0.0186313	0.942434		0	0	0	0	0	1		0	0	0	0	0	1		0	0	0	0	0
JU064935	2620	2244	1433	1914	1871	1009	559		559	1009	1433	1871	1914	2244	2620	450	424	438	43	330	376	2061		0.218341	0.205725	0.212518	0.0208637	0.160116	0.182436		0	0	0	0	0	0		0	0	0	0	0	0		0	0	0	0	0
JU062747	205	1795	1725	1353	3119	3029	1354		205	1353	1354	1725	1795	3029	3119	1148	1	371	70	1234	90	2914		0.39396	0.000343171	0.127316	0.024022	0.423473	0.0308854		0	0	0	0	0	0		0	0	0	0	0	0		0	0	0	0	0
JU071391	0	1256	243	363	1381	8011	2488		0	243	363	1256	1381	2488	8011	243	120	893	125	1107	5523	8011		0.0303333	0.0149794	0.111472	0.0156035	0.138185	0.689427		0	0	0	0	0	1		0	0	0	0	0	1		0	0	0	0	0
JU062817	9377	119	48	99	0	0	0		0	0	0	48	99	119	9377	0	0	48	51	20	9258	9377		0	0	0.00511891	0.00543884	0.00213288	0.987309		0	0	0	0	0	1		0	0	0	0	0	1		0	0	0	0	0
JU065710	3519	1555	1579	1485	1381	1077	294		294	1077	1381	1485	1555	1579	3519	783	304	104	70	24	1940	3225		0.242791	0.0942636	0.0322481	0.0217054	0.00744186	0.60155		0	0	0	0	0	1		0	0	0	0	0	1		0	0	0	0	0
JU063947	1309	1654	1438	1853	1494	2195	1123		1123	1309	1438	1494	1654	1853	2195	186	129	56	160	199	342	1072		0.173507	0.120336	0.0522388	0.149254	0.185634	0.31903		0	0	0	0	0	0		0	0	0	0	0	0		0	0	0	0	0
JU065678	616	897	1093	726	1203	740	2797		616	726	740	897	1093	1203	2797	110	14	157	196	110	1594	2181		0.0504356	0.00641907	0.0719853	0.089867	0.0504356	0.730857		0	0	0	0	0	1		0	0	0	0	0	1		0	0	0	0	0
scaffold594	0	329	24	99	757	1144	4387		0	24	99	329	757	1144	4387	24	75	230	428	387	3243	4387		0.00547071	0.017096	0.0524276	0.097561	0.0882152	0.73923		0	0	0	0	0	1		0	0	0	0	0	1		0	0	0	0	0
JU071623	822	1226	1822	1815	891	4847	721		721	822	891	1226	1815	1822	4847	101	69	335	589	7	3025	4126		0.0244789	0.0167232	0.0811924	0.142753	0.00169656	0.733156		0	0	0	0	0	1		0	0	0	0	0	1		0	0	0	0	0
JU064123	1310	748	2259	2376	1336	875	854		748	854	875	1310	1336	2259	2376	106	21	435	26	923	117	1628		0.0651106	0.0128993	0.267199	0.0159705	0.566953	0.0718673		0	0	0	0	1	0		0	0	0	0	0	0		0	0	0	0	0
JU064057	0	1077	1214	1650	668	3366	2061		0	668	1077	1214	1650	2061	3366	668	409	137	436	411	1305	3366		0.198455	0.121509	0.0407011	0.129531	0.122103	0.387701		0	0	0	0	0	0		0	0	0	0	0	0		0	0	0	0	0
JU069787	0	1107	3182	3630	1069	2221	0		0	0	1069	1107	2221	3182	3630	0	1069	38	1114	961	448	3630		0	0.29449	0.0104683	0.306887	0.264738	0.123416		0	0	0	0	0	0		0	0	0	0	0	0		0	0	0	0	0
JU062796	0	89	48	33	311	202	4682		0	33	48	89	202	311	4682	33	15	41	113	109	4371	4682		0.00704827	0.00320376	0.00875694	0.024135	0.0232806	0.933575		0	0	0	0	0	1		0	0	0	0	0	1		0	0	0	0	0
JU067035	0	89	0	0	89	0	4623		0	0	0	0	89	89	4623	0	0	0	89	0	4534	4623		0	0	0	0.0192516	0	0.980748		0	0	0	0	0	1		0	0	0	0	0	1		0	0	0	0	0
JU063036	0	2722	1384	825	2673	1346	971		0	825	971	1346	1384	2673	2722	825	146	375	38	1289	49	2722		0.303086	0.053637	0.137766	0.0139603	0.473549	0.0180015		0	0	0	0	0	0		0	0	0	0	0	0		0	0	0	0	0
JU066757	0	0	0	0	0	67	4549		0	0	0	0	0	67	4549	0	0	0	0	67	4482	4549		0	0	0	0	0.0147285	0.985271		0	0	0	0	0	1		0	0	0	0	0	1		0	0	0	0	0
JU062832	1438	1047	1482	1353	1782	1211	824		824	1047	1211	1353	1438	1482	1782	223	164	142	85	44	300	958		0.232777	0.17119	0.148225	0.0887265	0.045929	0.313152		0	0	0	0	0	0		0	0	0	0	0	0		0	0	0	0	0
JU063011	0	478	534	990	713	9492	1192		0	478	534	713	990	1192	9492	478	56	179	277	202	8300	9492		0.0503582	0.00589971	0.018858	0.0291825	0.0212811	0.874421		0	0	0	0	0	1		0	0	0	0	0	1		0	0	0	0	0
JU063615	102	688	340	1089	267	1009	3077		102	267	340	688	1009	1089	3077	165	73	348	321	80	1988	2975		0.0554622	0.0245378	0.116975	0.107899	0.0268908	0.668235		0	0	0	0	0	1		0	0	0	0	0	1		0	0	0	0	0
JU071283	0	957	2575	4258	356	673	250		0	250	356	673	957	2575	4258	250	106	317	284	1618	1683	4258		0.058713	0.0248943	0.0744481	0.066698	0.379991	0.395256		0	0	0	0	0	0		0	0	0	0	0	0		0	0	0	0	0
JU063589	25	568	1797	1617	935	3702	1207		25	568	935	1207	1617	1797	3702	543	367	272	410	180	1905	3677		0.147675	0.0998096	0.0739733	0.111504	0.048953	0.518085		0	0	0	0	0	1		0	0	0	0	0	0		0	0	0	0	0
JU062670	0	1795	2259	1848	1871	2288	235		0	235	1795	1848	1871	2259	2288	235	1560	53	23	388	29	2288		0.10271	0.681818	0.0231643	0.0100524	0.16958	0.0126748		0	1	0	0	0	0		0	1	0	0	0	0		0	1	0	0	0
JU062764	4290	1107	947	627	1114	0	176		0	176	627	947	1107	1114	4290	176	451	320	160	7	3176	4290		0.0410256	0.105128	0.0745921	0.037296	0.0016317	0.740326		0	0	0	0	0	1		0	0	0	0	0	1		0	0	0	0	0
JU062914	0	1226	2429	3300	579	605	515		0	515	579	605	1226	2429	3300	515	64	26	621	1203	871	3300		0.156061	0.0193939	0.00787879	0.188182	0.364545	0.263939		0	0	0	0	0	0		0	0	0	0	0	0		0	0	0	0	0
JU062698	2337	2034	1117	1419	490	1144	309		309	490	1117	1144	1419	2034	2337	181	627	27	275	615	303	2028		0.0892505	0.309172	0.0133136	0.135602	0.303254	0.149408		0	0	0	0	0	0		0	0	0	0	0	0		0	0	0	0	0
JU071674	0	1466	1627	2112	2406	3164	162		0	162	1466	1627	2112	2406	3164	162	1304	161	485	294	758	3164		0.051201	0.412137	0.050885	0.153287	0.0929204	0.23957		0	0	0	0	0	0		0	0	0	0	0	0		0	0	0	0	0
scaffold101	179	1585	1409	1353	1515	605	1295		179	605	1295	1353	1409	1515	1585	426	690	58	56	106	70	1406		0.302987	0.490754	0.0412518	0.0398293	0.0753912	0.0497866		0	0	0	0	0	0		0	0	0	0	0	0		0	0	0	0	0
JU071626	616	2932	1652	1584	1381	740	88		88	616	740	1381	1584	1652	2932	528	124	641	203	68	1280	2844		0.185654	0.0436006	0.225387	0.0713783	0.02391	0.45007		0	0	0	0	0	0		0	0	0	0	0	0		0	0	0	0	0
JU071740	1130	2632	1482	1716	1114	538	58		58	538	1114	1130	1482	1716	2632	480	576	16	352	234	916	2574		0.18648	0.223776	0.00621601	0.136752	0.0909091	0.355866		0	0	0	0	0	0		0	0	0	0	0	0		0	0	0	0	0
JU071592	642	1256	461	1023	891	1413	1811		461	642	891	1023	1256	1413	1811	181	249	132	233	157	398	1350		0.134074	0.184444	0.0977778	0.172593	0.116296	0.294815		0	0	0	0	0	0		0	0	0	0	0	0		0	0	0	0	0
JU062752	1258	2004	898	2343	1024	403	397		397	403	898	1024	1258	2004	2343	6	495	126	234	746	339	1946		0.00308325	0.254368	0.0647482	0.120247	0.38335	0.174203		0	0	0	0	0	0		0	0	0	0	0	0		0	0	0	0	0
JU071729	0	957	1554	2607	1292	3096	412		0	412	957	1292	1554	2607	3096	412	545	335	262	1053	489	3096		0.133075	0.176034	0.108204	0.0846253	0.340116	0.157946		0	0	0	0	0	0		0	0	0	0	0	0		0	0	0	0	0
JU071647	0	179	0	0	0	67	3916		0	0	0	0	67	179	3916	0	0	0	67	112	3737	3916		0	0	0	0.0171093	0.0286006	0.95429		0	0	0	0	0	1		0	0	0	0	0	1		0	0	0	0	0
JU071630	0	209	48	0	356	0	3739		0	0	0	48	209	356	3739	0	0	48	161	147	3383	3739		0	0	0.0128377	0.0430596	0.0393153	0.904787		0	0	0	0	0	1		0	0	0	0	0	1		0	0	0	0	0
JU062890	0	538	340	99	356	6664	1884		0	99	340	356	538	1884	6664	99	241	16	182	1346	4780	6664		0.0148559	0.0361645	0.00240096	0.0273109	0.201981	0.717287		0	0	0	0	0	1		0	0	0	0	0	1		0	0	0	0	0
JU066569	0	209	97	264	222	6732	2135		0	97	209	222	264	2135	6732	97	112	13	42	1871	4597	6732		0.0144088	0.016637	0.00193108	0.00623886	0.277926	0.682858		0	0	0	0	0	1		0	0	0	0	0	1		0	0	0	0	0
JU064174	25	987	826	1023	1737	403	1678		25	403	826	987	1023	1678	1737	378	423	161	36	655	59	1712		0.220794	0.247079	0.0940421	0.021028	0.382593	0.0344626		0	0	0	0	0	0		0	0	0	0	0	0		0	0	0	0	0
JU062738	0	1406	1093	957	1426	3568	721		0	721	957	1093	1406	1426	3568	721	236	136	313	20	2142	3568		0.202074	0.0661435	0.0381166	0.0877242	0.00560538	0.600336		0	0	0	0	0	1		0	0	0	0	0	1		0	0	0	0	0
JU062790	1027	1367	753	1056	3604	538	235		235	538	753	1027	1056	1367	3604	303	215	274	29	311	2237	3369		0.0899377	0.0638172	0.0813298	0.0086079	0.0923123	0.663995		0	0	0	0	0	1		0	0	0	0	0	1		0	0	0	0	0
JU071575	3519	927	656	594	713	202	265		202	265	594	656	713	927	3519	63	329	62	57	214	2592	3317		0.0189931	0.099186	0.0186916	0.0171842	0.0645161	0.781429		0	0	0	0	0	1		0	0	0	0	0	1		0	0	0	0	0
JU062789	1053	1645	1044	1518	1737	942	147		147	942	1044	1053	1518	1645	1737	795	102	9	465	127	92	1590		0.5	0.0641509	0.00566038	0.292453	0.0798742	0.0578616		0	0	0	0	0	0		0	0	0	0	0	0		0	0	0	0	0
JU062705	0	897	1506	2178	1114	1548	618		0	618	897	1114	1506	1548	2178	618	279	217	392	42	630	2178		0.283747	0.128099	0.0996327	0.179982	0.0192837	0.289256		0	0	0	0	0	0		0	0	0	0	0	0		0	0	0	0	0
JU063065	0	299	340	231	490	3500	2179		0	231	299	340	490	2179	3500	231	68	41	150	1689	1321	3500		0.066	0.0194286	0.0117143	0.0428571	0.482571	0.377429		0	0	0	0	0	0		0	0	0	0	0	0		0	0	0	0	0
JU063719	2312	1047	1117	1551	802	269	0		0	269	802	1047	1117	1551	2312	269	533	245	70	434	761	2312		0.116349	0.230536	0.105969	0.0302768	0.187716	0.329152		0	0	0	0	0	0		0	0	0	0	0	0		0	0	0	0	0
JU071687	0	867	48	165	267	3029	2193		0	48	165	267	867	2193	3029	48	117	102	600	1326	836	3029		0.0158468	0.0386266	0.0336745	0.198085	0.437768	0.275999		0	0	0	0	0	0		0	0	0	0	0	0		0	0	0	0	0
JU063899	745	1974	898	2277	713	336	191		191	336	713	745	898	1974	2277	145	377	32	153	1076	303	2086		0.069511	0.180729	0.0153404	0.0733461	0.51582	0.145254		0	0	0	0	1	0		0	0	0	0	0	0		0	0	0	0	0
JU062710	436	179	583	1155	623	336	1958		179	336	436	583	623	1155	1958	157	100	147	40	532	803	1779		0.0882518	0.0562114	0.0826307	0.0224845	0.299044	0.451377		0	0	0	0	0	0		0	0	0	0	0	0		0	0	0	0	0
JU065613	128	269	898	1584	668	2019	1281		128	269	668	898	1281	1584	2019	141	399	230	383	303	435	1891		0.0745637	0.210999	0.121629	0.202538	0.160233	0.230037		0	0	0	0	0	0		0	0	0	0	0	0		0	0	0	0	0
JU071662	0	1615	534	495	2851	2288	603		0	495	534	603	1615	2288	2851	495	39	69	1012	673	563	2851		0.173623	0.0136794	0.024202	0.354963	0.236058	0.197475		0	0	0	0	0	0		0	0	0	0	0	0		0	0	0	0	0
JU071610	205	867	1117	330	1158	538	1487		205	330	538	867	1117	1158	1487	125	208	329	250	41	329	1282		0.0975039	0.162246	0.25663	0.195008	0.0319813	0.25663		0	0	0	0	0	0		0	0	0	0	0	0		0	0	0	0	0
JU068504	4675	598	72	495	222	67	0		0	67	72	222	495	598	4675	67	5	150	273	103	4077	4675		0.0143316	0.00106952	0.0320856	0.0583957	0.0220321	0.872086		0	0	0	0	0	1		0	0	0	0	0	1		0	0	0	0	0
JU062800	0	688	1141	330	2807	2019	765		0	330	688	765	1141	2019	2807	330	358	77	376	878	788	2807		0.117563	0.127538	0.0274314	0.133951	0.312789	0.280727		0	0	0	0	0	0		0	0	0	0	0	0		0	0	0	0	0
JU062885	0	1077	1676	2079	1648	1211	0		0	0	1077	1211	1648	1676	2079	0	1077	134	437	28	403	2079		0	0.518038	0.0644541	0.210197	0.013468	0.193843		0	1	0	0	0	0		0	0	0	0	0	0		0	0	0	0	0
JU062855	154	508	728	660	935	336	1796		154	336	508	660	728	935	1796	182	172	152	68	207	861	1642		0.11084	0.10475	0.09257	0.0414129	0.126066	0.524361		0	0	0	0	0	1		0	0	0	0	0	0		0	0	0	0	0
JU063922	1079	389	898	1023	668	1279	927		389	668	898	927	1023	1079	1279	279	230	29	96	56	200	890		0.313483	0.258427	0.0325843	0.107865	0.0629213	0.224719		0	0	0	0	0	0		0	0	0	0	0	0		0	0	0	0	0
contig2750	1849	1346	413	1353	1648	202	44		44	202	413	1346	1353	1648	1849	158	211	933	7	295	201	1805		0.0875346	0.116898	0.516898	0.00387812	0.163435	0.111357		0	0	1	0	0	0		0	0	0	0	0	0		0	0	0	0	0
JU071581	51	269	850	594	534	2356	1531		51	269	534	594	850	1531	2356	218	265	60	256	681	825	2305		0.094577	0.114967	0.0260304	0.111063	0.295445	0.357918		0	0	0	0	0	0		0	0	0	0	0	0		0	0	0	0	0
JU064216	1156	538	461	561	311	403	1472		311	403	461	538	561	1156	1472	92	58	77	23	595	316	1161		0.079242	0.0499569	0.0663221	0.0198105	0.512489	0.272179		0	0	0	0	1	0		0	0	0	0	0	0		0	0	0	0	0
JU063025	0	89	97	99	0	67	2900		0	0	67	89	97	99	2900	0	67	22	8	2	2801	2900		0	0.0231034	0.00758621	0.00275862	0.000689655	0.965862		0	0	0	0	0	1		0	0	0	0	0	1		0	0	0	0	0
JU063684	256	1136	1093	891	1604	1615	412		256	412	891	1093	1136	1604	1615	156	479	202	43	468	11	1359		0.11479	0.352465	0.148639	0.0316409	0.344371	0.00809419		0	0	0	0	0	0		0	0	0	0	0	0		0	0	0	0	0
JU071650	128	1226	971	1485	1336	875	471		128	471	875	971	1226	1336	1485	343	404	96	255	110	149	1357		0.252763	0.297716	0.0707443	0.187915	0.0810612	0.109801		0	0	0	0	0	0		0	0	0	0	0	0		0	0	0	0	0
JU064491	282	1136	315	429	1782	605	1192		282	315	429	605	1136	1192	1782	33	114	176	531	56	590	1500		0.022	0.076	0.117333	0.354	0.0373333	0.393333		0	0	0	0	0	0		0	0	0	0	0	0		0	0	0	0	0
JU064178	3519	478	413	363	267	0	250		0	250	267	363	413	478	3519	250	17	96	50	65	3041	3519		0.0710429	0.00483092	0.0272805	0.0142086	0.0184712	0.864166		0	0	0	0	0	1		0	0	0	0	0	1		0	0	0	0	0
JU065909	822	1645	1457	594	1247	67	117		67	117	594	822	1247	1457	1645	50	477	228	425	210	188	1578		0.0316857	0.302281	0.144487	0.269328	0.13308	0.119138		0	0	0	0	0	0		0	0	0	0	0	0		0	0	0	0	0
JU062879	2903	807	485	627	311	269	162		162	269	311	485	627	807	2903	107	42	174	142	180	2096	2741		0.0390368	0.0153229	0.0634805	0.0518059	0.0656695	0.764684		0	0	0	0	0	1		0	0	0	0	0	1		0	0	0	0	0
JU064492	154	957	1166	1320	713	1009	633		154	633	713	957	1009	1166	1320	479	80	244	52	157	154	1166		0.410806	0.0686106	0.209262	0.0445969	0.134648	0.132075		0	0	0	0	0	0		0	0	0	0	0	0		0	0	0	0	0
JU064374	1181	1226	874	1419	802	0	235		0	235	802	874	1181	1226	1419	235	567	72	307	45	193	1419		0.16561	0.399577	0.05074	0.21635	0.0317125	0.136011		0	0	0	0	0	0		0	0	0	0	0	0		0	0	0	0	0
JU062693	51	867	1093	1419	1737	1077	338		51	338	867	1077	1093	1419	1737	287	529	210	16	326	318	1686		0.170225	0.31376	0.124555	0.00948992	0.193357	0.188612		0	0	0	0	0	0		0	0	0	0	0	0		0	0	0	0	0
JU065612	411	568	583	429	757	1750	1207		411	429	568	583	757	1207	1750	18	139	15	174	450	543	1339		0.0134429	0.103809	0.0112024	0.129948	0.336072	0.405527		0	0	0	0	0	0		0	0	0	0	0	0		0	0	0	0	0
JU063420	4085	239	48	429	490	0	29		0	29	48	239	429	490	4085	29	19	191	190	61	3595	4085		0.00709914	0.00465116	0.0467564	0.0465116	0.0149327	0.880049		0	0	0	0	0	1		0	0	0	0	0	1		0	0	0	0	0
JU063017	0	1017	1093	1485	1381	2423	58		0	58	1017	1093	1381	1485	2423	58	959	76	288	104	938	2423		0.0239373	0.39579	0.0313661	0.118861	0.042922	0.387123		0	0	0	0	0	0		0	0	0	0	0	0		0	0	0	0	0
JU062903	0	179	24	0	0	269	2694		0	0	0	24	179	269	2694	0	0	24	155	90	2425	2694		0	0	0.00890869	0.0575353	0.0334076	0.900148		0	0	0	0	0	1		0	0	0	0	0	1		0	0	0	0	0
JU071653	2723	299	558	297	534	336	427		297	299	336	427	534	558	2723	2	37	91	107	24	2165	2426		0.000824402	0.0152514	0.0375103	0.0441055	0.00989283	0.892415		0	0	0	0	0	1		0	0	0	0	0	1		0	0	0	0	0
JU066605	0	0	0	33	0	0	2827		0	0	0	0	0	33	2827	0	0	0	0	33	2794	2827		0	0	0	0	0.0116732	0.988327		0	0	0	0	0	1		0	0	0	0	0	1		0	0	0	0	0
JU062775	0	1107	1554	1353	1292	1077	73		0	73	1077	1107	1292	1353	1554	73	1004	30	185	61	201	1554		0.0469755	0.646075	0.019305	0.119048	0.0392535	0.129344		0	1	0	0	0	0		0	1	0	0	0	0		0	0	0	0	0
JU071632	0	777	1312	1155	1604	1077	338		0	338	777	1077	1155	1312	1604	338	439	300	78	157	292	1604		0.210723	0.273691	0.187032	0.0486284	0.0978803	0.182045		0	0	0	0	0	0		0	0	0	0	0	0		0	0	0	0	0
JU070941	0	1555	1190	1683	668	1481	14		0	14	668	1190	1481	1555	1683	14	654	522	291	74	128	1683		0.00831848	0.388592	0.31016	0.172906	0.0439691	0.0760547		0	0	0	0	0	0		0	0	0	0	0	0		0	0	0	0	0
JU071595	2004	807	704	891	579	202	176		176	202	579	704	807	891	2004	26	377	125	103	84	1113	1828		0.0142232	0.206236	0.0683807	0.0563457	0.0459519	0.608862		0	0	0	0	0	1		0	0	0	0	0	1		0	0	0	0	0
JU064606	154	628	947	1452	1203	740	589		154	589	628	740	947	1203	1452	435	39	112	207	256	249	1298		0.335131	0.0300462	0.0862866	0.159476	0.197227	0.191834		0	0	0	0	0	0		0	0	0	0	0	0		0	0	0	0	0
JU069424	2363	448	656	1485	178	134	44		44	134	178	448	656	1485	2363	90	44	270	208	829	878	2319		0.0388098	0.0189737	0.116429	0.0896938	0.357482	0.378611		0	0	0	0	0	0		0	0	0	0	0	0		0	0	0	0	0
JU071607	359	568	340	759	490	1615	1207		340	359	490	568	759	1207	1615	19	131	78	191	448	408	1275		0.014902	0.102745	0.0611765	0.149804	0.351373	0.32		0	0	0	0	0	0		0	0	0	0	0	0		0	0	0	0	0
JU062827	0	927	1797	1782	623	471	58		0	58	471	623	927	1782	1797	58	413	152	304	855	15	1797		0.032276	0.229827	0.0845854	0.169171	0.475793	0.00834725		0	0	0	0	0	0		0	0	0	0	0	0		0	0	0	0	0
scaffold508	0	29	4178	0	89	134	103		0	0	29	89	103	134	4178	0	29	60	14	31	4044	4178		0	0.00694112	0.0143609	0.00335089	0.00741982	0.967927		0	0	0	0	0	1		0	0	0	0	0	1		0	0	0	0	0
JU063449	0	628	145	495	757	4645	824		0	145	495	628	757	824	4645	145	350	133	129	67	3821	4645		0.0312164	0.0753498	0.0286329	0.0277718	0.0144241	0.822605		0	0	0	0	0	1		0	0	0	0	0	1		0	0	0	0	0
JU063686	0	1107	1360	726	1381	1750	162		0	162	726	1107	1360	1381	1750	162	564	381	253	21	369	1750		0.0925714	0.322286	0.217714	0.144571	0.012	0.210857		0	0	0	0	0	0		0	0	0	0	0	0		0	0	0	0	0
JU065967	2055	538	583	759	401	740	206		206	401	538	583	740	759	2055	195	137	45	157	19	1296	1849		0.105462	0.0740941	0.0243375	0.0849108	0.0102758	0.700919		0	0	0	0	0	1		0	0	0	0	0	1		0	0	0	0	0
JU069805	4521	29	24	33	0	0	0		0	0	0	24	29	33	4521	0	0	24	5	4	4488	4521		0	0	0.00530856	0.00110595	0.00088476	0.992701		0	0	0	0	0	1		0	0	0	0	0	1		0	0	0	0	0
JU063276	0	0	24	0	0	202	2547		0	0	0	0	24	202	2547	0	0	0	24	178	2345	2547		0	0	0	0.00942285	0.0698861	0.920691		0	0	0	0	0	1		0	0	0	0	0	1		0	0	0	0	0
JU062911	488	1675	728	1122	490	1009	132		132	488	490	728	1009	1122	1675	356	2	238	281	113	553	1543		0.230719	0.00129618	0.154245	0.182113	0.073234	0.358393		0	0	0	0	0	0		0	0	0	0	0	0		0	0	0	0	0
JU071634	128	598	413	792	490	807	1251		128	413	490	598	792	807	1251	285	77	108	194	15	444	1123		0.253785	0.0685663	0.096171	0.172752	0.0133571	0.39537		0	0	0	0	0	0		0	0	0	0	0	0		0	0	0	0	0
contig6337	102	1017	971	957	891	1144	368		102	368	891	957	971	1017	1144	266	523	66	14	46	127	1042		0.255278	0.501919	0.0633397	0.0134357	0.0441459	0.121881		0	0	0	0	0	0		0	0	0	0	0	0		0	0	0	0	0
JU062905	0	29	0	0	0	67	2444		0	0	0	0	29	67	2444	0	0	0	29	38	2377	2444		0	0	0	0.0118658	0.0155483	0.972586		0	0	0	0	0	1		0	0	0	0	0	1		0	0	0	0	0
JU071751	0	807	194	66	2361	1009	927		0	66	194	807	927	1009	2361	66	128	613	120	82	1352	2361		0.0279543	0.0542143	0.259636	0.0508259	0.034731	0.572639		0	0	0	0	0	1		0	0	0	0	0	1		0	0	0	0	0
JU069013	0	628	656	2013	891	807	368		0	368	628	656	807	891	2013	368	260	28	151	84	1122	2013		0.182812	0.12916	0.0139096	0.0750124	0.0417288	0.557377		0	0	0	0	0	1		0	0	0	0	0	0		0	0	0	0	0
JU064245	0	0	48	0	89	0	2370		0	0	0	0	48	89	2370	0	0	0	48	41	2281	2370		0	0	0	0.0202532	0.0172996	0.962447		0	0	0	0	0	1		0	0	0	0	0	1		0	0	0	0	0
JU063792	179	658	1141	825	222	202	824		179	202	222	658	824	825	1141	23	20	436	166	1	316	962		0.0239085	0.02079	0.453222	0.172557	0.0010395	0.328482		0	0	0	0	0	0		0	0	0	0	0	0		0	0	0	0	0
JU062866	1952	418	413	561	623	269	323		269	323	413	418	561	623	1952	54	90	5	143	62	1329	1683		0.0320856	0.0534759	0.00297089	0.0849673	0.036839	0.789661		0	0	0	0	0	1		0	0	0	0	0	1		0	0	0	0	0
JU063623	0	718	631	528	1158	1077	824		0	528	631	718	824	1077	1158	528	103	87	106	253	81	1158		0.455959	0.0889465	0.0751295	0.0915371	0.21848	0.0699482		0	0	0	0	0	0		0	0	0	0	0	0		0	0	0	0	0
contig3751	3751	89	170	132	0	0	0		0	0	0	89	132	170	3751	0	0	89	43	38	3581	3751		0	0	0.023727	0.0114636	0.0101306	0.954679		0	0	0	0	0	1		0	0	0	0	0	1		0	0	0	0	0
JU062751	2671	179	72	132	222	0	559		0	72	132	179	222	559	2671	72	60	47	43	337	2112	2671		0.0269562	0.0224635	0.0175964	0.0160988	0.12617	0.790715		0	0	0	0	0	1		0	0	0	0	0	1		0	0	0	0	0
JU063191	0	329	121	99	668	269	1766		0	99	121	269	329	668	1766	99	22	148	60	339	1098	1766		0.0560589	0.0124575	0.0838052	0.0339751	0.191959	0.621744		0	0	0	0	0	1		0	0	0	0	0	1		0	0	0	0	0
JU064781	0	239	72	0	356	0	2046		0	0	0	72	239	356	2046	0	0	72	167	117	1690	2046		0	0	0.0351906	0.0816227	0.0571848	0.826002		0	0	0	0	0	1		0	0	0	0	0	1		0	0	0	0	0
JU062942	0	987	1457	1221	802	538	29		0	29	538	802	987	1221	1457	29	509	264	185	234	236	1457		0.0199039	0.349348	0.181194	0.126973	0.160604	0.161977		0	0	0	0	0	0		0	0	0	0	0	0		0	0	0	0	0
JU062895	0	1136	243	99	2673	2087	206		0	99	206	243	1136	2087	2673	99	107	37	893	951	586	2673		0.037037	0.0400299	0.0138421	0.334082	0.35578	0.219229		0	0	0	0	0	0		0	0	0	0	0	0		0	0	0	0	0
JU066073	0	777	801	957	1247	1009	368		0	368	777	801	957	1009	1247	368	409	24	156	52	238	1247		0.295108	0.327987	0.0192462	0.1251	0.0417001	0.190858		0	0	0	0	0	0		0	0	0	0	0	0		0	0	0	0	0
JU062935	616	1675	680	891	267	202	162		162	202	267	616	680	891	1675	40	65	349	64	211	784	1513		0.0264375	0.042961	0.230668	0.0423001	0.139458	0.518176		0	0	0	0	0	1		0	0	0	0	0	0		0	0	0	0	0
JU065332	179	389	340	363	713	1144	1133		179	340	363	389	713	1133	1144	161	23	26	324	420	11	965		0.166839	0.0238342	0.026943	0.335751	0.435233	0.011399		0	0	0	0	0	0		0	0	0	0	0	0		0	0	0	0	0
JU063743	2158	538	437	462	445	134	117		117	134	437	445	462	538	2158	17	303	8	17	76	1620	2041		0.00832925	0.148457	0.00391965	0.00832925	0.0372366	0.793729		0	0	0	0	0	1		0	0	0	0	0	1		0	0	0	0	0
JU071684	0	807	1093	1023	1069	1211	132		0	132	807	1023	1069	1093	1211	132	675	216	46	24	118	1211		0.109001	0.557391	0.178365	0.0379851	0.0198183	0.0974401		0	1	0	0	0	0		0	0	0	0	0	0		0	0	0	0	0
JU064147	565	568	1069	396	445	673	530		396	445	530	565	568	673	1069	49	85	35	3	105	396	673		0.0728083	0.1263	0.0520059	0.00445765	0.156018	0.58841		0	0	0	0	0	1		0	0	0	0	0	1		0	0	0	0	0
JU071736	2492	748	218	594	133	0	0		0	0	133	218	594	748	2492	0	133	85	376	154	1744	2492		0	0.0533708	0.0341091	0.150883	0.0617978	0.699839		0	0	0	0	0	1		0	0	0	0	0	1		0	0	0	0	0
JU064249	0	538	315	561	713	740	1133		0	315	538	561	713	740	1133	315	223	23	152	27	393	1133		0.278023	0.196823	0.0203001	0.134157	0.0238305	0.346867		0	0	0	0	0	0		0	0	0	0	0	0		0	0	0	0	0
JU062748	25	448	413	396	623	1750	986		25	396	413	448	623	986	1750	371	17	35	175	363	764	1725		0.215072	0.00985507	0.0202899	0.101449	0.210435	0.442899		0	0	0	0	0	0		0	0	0	0	0	0		0	0	0	0	0
JU066045	1156	389	340	231	490	269	809		231	269	340	389	490	809	1156	38	71	49	101	319	347	925		0.0410811	0.0767568	0.052973	0.109189	0.344865	0.375135		0	0	0	0	0	0		0	0	0	0	0	0		0	0	0	0	0
JU071576	513	488	663	425	872	652	602		425	488	513	602	652	663	872	63	25	89	50	11	209	447		0.14094	0.0559284	0.199105	0.111857	0.0246085	0.467562		0	0	0	0	0	0		0	0	0	0	0	0		0	0	0	0	0
JU068226	0	149	72	66	178	134	1899		0	66	72	134	149	178	1899	66	6	62	15	29	1721	1899		0.0347551	0.00315956	0.0326488	0.00789889	0.0152712	0.906266		0	0	0	0	0	1		0	0	0	0	0	1		0	0	0	0	0
JU064068	0	119	291	132	267	538	1619		0	119	132	267	291	538	1619	119	13	135	24	247	1081	1619		0.0735022	0.00802965	0.0833848	0.014824	0.152563	0.667696		0	0	0	0	0	1		0	0	0	0	0	1		0	0	0	0	0
JU062754	154	478	1093	1518	534	403	162		154	162	403	478	534	1093	1518	8	241	75	56	559	425	1364		0.0058651	0.176686	0.0549853	0.0410557	0.409824	0.311584		0	0	0	0	0	0		0	0	0	0	0	0		0	0	0	0	0
JU064102	462	628	704	528	1559	942	132		132	462	528	628	704	942	1559	330	66	100	76	238	617	1427		0.231254	0.0462509	0.0700771	0.0532586	0.166783	0.432376		0	0	0	0	0	0		0	0	0	0	0	0		0	0	0	0	0
JU063746	25	149	315	561	178	67	1487		25	67	149	178	315	561	1487	42	82	29	137	246	926	1462		0.0287278	0.0560876	0.0198358	0.0937073	0.168263	0.633379		0	0	0	0	0	1		0	0	0	0	0	1		0	0	0	0	0
JU062956	0	0	145	66	0	67	1943		0	0	0	66	67	145	1943	0	0	66	1	78	1798	1943		0	0	0.0339681	0.000514668	0.0401441	0.925373		0	0	0	0	0	1		0	0	0	0	0	1		0	0	0	0	0
JU063184	0	0	0	0	0	0	2076		0	0	0	0	0	0	2076	0	0	0	0	0	2076	2076		0	0	0	0	0	1		0	0	0	0	0	1		0	0	0	0	0	1		0	0	0	0	0
JU063689	308	418	267	396	802	942	883		267	308	396	418	802	883	942	41	88	22	384	81	59	675		0.0607407	0.13037	0.0325926	0.568889	0.12	0.0874074		0	0	0	1	0	0		0	0	0	1	0	0		0	0	0	0	0
JU065431	25	508	607	1287	1292	1211	162		25	162	508	607	1211	1287	1292	137	346	99	604	76	5	1267		0.108129	0.273086	0.0781373	0.476717	0.0599842	0.00394633		0	0	0	0	0	0		0	0	0	0	0	0		0	0	0	0	0
JU062842	1387	718	364	594	668	403	103		103	364	403	594	668	718	1387	261	39	191	74	50	669	1284		0.203271	0.0303738	0.148754	0.0576324	0.0389408	0.521028		0	0	0	0	0	1		0	0	0	0	0	0		0	0	0	0	0
JU071580	231	598	413	561	713	1481	559		231	413	559	561	598	713	1481	182	146	2	37	115	768	1250		0.1456	0.1168	0.0016	0.0296	0.092	0.6144		0	0	0	0	0	1		0	0	0	0	0	1		0	0	0	0	0
JU062851	308	568	243	132	490	673	1045		132	243	308	490	568	673	1045	111	65	182	78	105	372	913		0.121577	0.0711939	0.199343	0.0854326	0.115005	0.407448		0	0	0	0	0	0		0	0	0	0	0	0		0	0	0	0	0
JU063277	0	0	0	0	0	202	1973		0	0	0	0	0	202	1973	0	0	0	0	202	1771	1973		0	0	0	0	0.102382	0.897618		0	0	0	0	0	1		0	0	0	0	0	1		0	0	0	0	0
JU071608	128	718	485	792	846	403	559		128	403	485	559	718	792	846	275	82	74	159	74	54	718		0.383008	0.114206	0.103064	0.221448	0.103064	0.0752089		0	0	0	0	0	0		0	0	0	0	0	0		0	0	0	0	0
JU063973	0	329	170	99	267	1211	1339		0	99	170	267	329	1211	1339	99	71	97	62	882	128	1339		0.0739358	0.0530246	0.0724421	0.0463032	0.658701	0.0955937		0	0	0	0	1	0		0	0	0	0	1	0		0	0	0	0	0
JU066094	1875	628	218	363	534	134	103		103	134	218	363	534	628	1875	31	84	145	171	94	1247	1772		0.0174944	0.0474041	0.0818284	0.0965011	0.0530474	0.703725		0	0	0	0	0	1		0	0	0	0	0	1		0	0	0	0	0
JU065228	770	867	850	759	445	269	44		44	269	445	759	770	850	867	225	176	314	11	80	17	823		0.27339	0.213852	0.381531	0.0133657	0.0972053	0.0206561		0	0	0	0	0	0		0	0	0	0	0	0		0	0	0	0	0
JU065937	0	149	97	66	891	4106	618		0	66	97	149	618	891	4106	66	31	52	469	273	3215	4106		0.016074	0.00754993	0.0126644	0.114223	0.0664881	0.783		0	0	0	0	0	1		0	0	0	0	0	1		0	0	0	0	0
JU071601	462	508	340	264	579	336	824		264	336	340	462	508	579	824	72	4	122	46	71	245	560		0.128571	0.00714286	0.217857	0.0821429	0.126786	0.4375		0	0	0	0	0	0		0	0	0	0	0	0		0	0	0	0	0
JU071666	0	119	170	198	445	740	1354		0	119	170	198	445	740	1354	119	51	28	247	295	614	1354		0.0878877	0.0376662	0.0206795	0.182422	0.217873	0.453471		0	0	0	0	0	0		0	0	0	0	0	0		0	0	0	0	0
JU065605	2620	299	145	165	267	0	0		0	0	145	165	267	299	2620	0	145	20	102	32	2321	2620		0	0.0553435	0.00763359	0.0389313	0.0122137	0.885878		0	0	0	0	0	1		0	0	0	0	0	1		0	0	0	0	0
JU064591	102	508	753	1056	757	875	220		102	220	508	753	757	875	1056	118	288	245	4	118	181	954		0.12369	0.301887	0.256813	0.00419287	0.12369	0.189727		0	0	0	0	0	0		0	0	0	0	0	0		0	0	0	0	0
JU071700	0	0	0	0	0	0	1899		0	0	0	0	0	0	1899	0	0	0	0	0	1899	1899		0	0	0	0	0	1		0	0	0	0	0	1		0	0	0	0	0	1		0	0	0	0	0
JU062837	411	1675	558	528	356	269	73		73	269	356	411	528	558	1675	196	87	55	117	30	1117	1602		0.122347	0.0543071	0.0343321	0.0730337	0.0187266	0.697253		0	0	0	0	0	1		0	0	0	0	0	1		0	0	0	0	0
JU065045	1541	478	72	66	311	1077	338		66	72	311	338	478	1077	1541	6	239	27	140	599	464	1475		0.0040678	0.162034	0.0183051	0.0949153	0.406102	0.314576		0	0	0	0	0	0		0	0	0	0	0	0		0	0	0	0	0
JU062893	616	628	558	693	401	202	382		202	382	401	558	616	628	693	180	19	157	58	12	65	491		0.366599	0.0386965	0.319756	0.118126	0.0244399	0.132383		0	0	0	0	0	0		0	0	0	0	0	0		0	0	0	0	0
JU062950	0	688	583	1320	1069	471	132		0	132	471	583	688	1069	1320	132	339	112	105	381	251	1320		0.1	0.256818	0.0848485	0.0795455	0.288636	0.190152		0	0	0	0	0	0		0	0	0	0	0	0		0	0	0	0	0
JU071668	256	718	534	396	623	269	589		256	269	396	534	589	623	718	13	127	138	55	34	95	462		0.0281385	0.274892	0.298701	0.119048	0.0735931	0.205628		0	0	0	0	0	0		0	0	0	0	0	0		0	0	0	0	0
JU071561	2569	359	72	132	178	67	29		29	67	72	132	178	359	2569	38	5	60	46	181	2210	2540		0.0149606	0.0019685	0.023622	0.0181102	0.0712598	0.870079		0	0	0	0	0	1		0	0	0	0	0	1		0	0	0	0	0
JU071679	0	1017	947	1122	401	538	14		0	14	401	538	947	1017	1122	14	387	137	409	70	105	1122		0.0124777	0.34492	0.122103	0.364528	0.0623886	0.0935829		0	0	0	0	0	0		0	0	0	0	0	0		0	0	0	0	0
JU063871	77	628	485	858	1024	1346	176		77	176	485	628	858	1024	1346	99	309	143	230	166	322	1269		0.0780142	0.243499	0.112687	0.181245	0.130812	0.253743		0	0	0	0	0	0		0	0	0	0	0	0		0	0	0	0	0
JU066135	205	329	388	957	311	471	692		205	311	329	388	471	692	957	106	18	59	83	221	265	752		0.140957	0.0239362	0.0784574	0.110372	0.293883	0.352394		0	0	0	0	0	0		0	0	0	0	0	0		0	0	0	0	0
JU062828	25	897	510	759	490	673	412		25	412	490	510	673	759	897	387	78	20	163	86	138	872		0.443807	0.0894495	0.0229358	0.186927	0.0986239	0.158257		0	0	0	0	0	0		0	0	0	0	0	0		0	0	0	0	0
JU064739	51	389	680	990	802	1009	265		51	265	389	680	802	990	1009	214	124	291	122	188	19	958		0.223382	0.129436	0.303758	0.127349	0.196242	0.019833		0	0	0	0	0	0		0	0	0	0	0	0		0	0	0	0	0
JU067895	513	209	485	726	401	538	559		209	401	485	513	538	559	726	192	84	28	25	21	167	517		0.371373	0.162476	0.0541586	0.0483559	0.040619	0.323017		0	0	0	0	0	0		0	0	0	0	0	0		0	0	0	0	0
JU071584	0	299	267	0	623	2625	721		0	0	267	299	623	721	2625	0	267	32	324	98	1904	2625		0	0.101714	0.0121905	0.123429	0.0373333	0.725333		0	0	0	0	0	1		0	0	0	0	0	1		0	0	0	0	0
JU069247	2004	209	243	825	89	0	0		0	0	89	209	243	825	2004	0	89	120	34	582	1179	2004		0	0.0444112	0.0598802	0.0169661	0.290419	0.588323		0	0	0	0	0	1		0	0	0	0	0	1		0	0	0	0	0
JU063858	565	568	558	528	534	67	427		67	427	528	534	558	565	568	360	101	6	24	7	3	501		0.718563	0.201597	0.011976	0.0479042	0.0139721	0.00598802		1	0	0	0	0	0		1	0	0	0	0	0		1	0	0	0	0
JU062907	0	389	923	1749	401	471	14		0	14	389	401	471	923	1749	14	375	12	70	452	826	1749		0.00800457	0.214408	0.00686106	0.0400229	0.258433	0.47227		0	0	0	0	0	0		0	0	0	0	0	0		0	0	0	0	0
JU064001	334	149	461	264	846	1817	441		149	264	334	441	461	846	1817	115	70	107	20	385	971	1668		0.0689448	0.0419664	0.0641487	0.0119904	0.230815	0.582134		0	0	0	0	0	1		0	0	0	0	0	1		0	0	0	0	0
JU062857	1464	269	413	264	623	134	191		134	191	264	269	413	623	1464	57	73	5	144	210	841	1330		0.0428571	0.0548872	0.0037594	0.108271	0.157895	0.632331		0	0	0	0	0	1		0	0	0	0	0	1		0	0	0	0	0
JU064488	411	239	267	561	490	269	765		239	267	269	411	490	561	765	28	2	142	79	71	204	526		0.0532319	0.00380228	0.269962	0.15019	0.134981	0.387833		0	0	0	0	0	0		0	0	0	0	0	0		0	0	0	0	0
JU063831	359	807	364	396	534	202	530		202	359	364	396	530	534	807	157	5	32	134	4	273	605		0.259504	0.00826446	0.0528926	0.221488	0.00661157	0.45124		0	0	0	0	0	0		0	0	0	0	0	0		0	0	0	0	0
JU071646	0	867	801	462	891	202	294		0	202	294	462	801	867	891	202	92	168	339	66	24	891		0.226712	0.103255	0.188552	0.380471	0.0740741	0.026936		0	0	0	0	0	0		0	0	0	0	0	0		0	0	0	0	0
JU071659	256	748	680	132	579	673	412		132	256	412	579	673	680	748	124	156	167	94	7	68	616		0.201299	0.253247	0.271104	0.152597	0.0113636	0.11039		0	0	0	0	0	0		0	0	0	0	0	0		0	0	0	0	0
JU064307	1490	688	340	297	579	0	14		0	14	297	340	579	688	1490	14	283	43	239	109	802	1490		0.00939597	0.189933	0.0288591	0.160403	0.0731544	0.538255		0	0	0	0	0	1		0	0	0	0	0	0		0	0	0	0	0
contig5709	2106	209	170	396	178	269	14		14	170	178	209	269	396	2106	156	8	31	60	127	1710	2092		0.0745698	0.00382409	0.0148184	0.0286807	0.0607075	0.8174		0	0	0	0	0	1		0	0	0	0	0	1		0	0	0	0	0
JU064909	411	269	315	330	311	605	765		269	311	315	330	411	605	765	42	4	15	81	194	160	496		0.0846774	0.00806452	0.0302419	0.163306	0.391129	0.322581		0	0	0	0	0	0		0	0	0	0	0	0		0	0	0	0	0
JU064116	308	299	461	231	222	336	839		222	231	299	308	336	461	839	9	68	9	28	125	378	617		0.0145867	0.110211	0.0145867	0.0453809	0.202593	0.612642		0	0	0	0	0	1		0	0	0	0	0	1		0	0	0	0	0
JU069916	0	29	24	0	0	0	1663		0	0	0	0	24	29	1663	0	0	0	24	5	1634	1663		0	0	0	0.0144317	0.00300661	0.982562		0	0	0	0	0	1		0	0	0	0	0	1		0	0	0	0	0
JU062941	0	389	218	330	1114	1615	485		0	218	330	389	485	1114	1615	218	112	59	96	629	501	1615		0.134985	0.0693498	0.0365325	0.0594427	0.389474	0.310217		0	0	0	0	0	0		0	0	0	0	0	0		0	0	0	0	0
JU062865	822	239	388	429	178	403	515		178	239	388	403	429	515	822	61	149	15	26	86	307	644		0.0947205	0.231366	0.0232919	0.0403727	0.13354	0.476708		0	0	0	0	0	0		0	0	0	0	0	0		0	0	0	0	0
JU070099	0	89	607	1386	133	740	427		0	89	133	427	607	740	1386	89	44	294	180	133	646	1386		0.0642136	0.031746	0.212121	0.12987	0.0959596	0.466089		0	0	0	0	0	0		0	0	0	0	0	0		0	0	0	0	0
JU064684	539	688	680	561	713	67	103		67	103	539	561	680	688	713	36	436	22	119	8	25	646		0.0557276	0.674923	0.0340557	0.184211	0.0123839	0.0386997		0	1	0	0	0	0		0	1	0	0	0	0		0	0	0	0	0
JU064207	51	688	413	726	668	336	427		51	336	413	427	668	688	726	285	77	14	241	20	38	675		0.422222	0.114074	0.0207407	0.357037	0.0296296	0.0562963		0	0	0	0	0	0		0	0	0	0	0	0		0	0	0	0	0
JU064349	0	418	753	858	534	673	279		0	279	418	534	673	753	858	279	139	116	139	80	105	858		0.325175	0.162005	0.135198	0.162005	0.0932401	0.122378		0	0	0	0	0	0		0	0	0	0	0	0		0	0	0	0	0
JU062861	0	59	24	363	0	0	1443		0	0	0	24	59	363	1443	0	0	24	35	304	1080	1443		0	0	0.016632	0.024255	0.210672	0.748441		0	0	0	0	0	1		0	0	0	0	0	1		0	0	0	0	0
JU062830	0	29	0	0	0	0	1634		0	0	0	0	0	29	1634	0	0	0	0	29	1605	1634		0	0	0	0	0.0177479	0.982252		0	0	0	0	0	1		0	0	0	0	0	1		0	0	0	0	0
scaffold505	513	1615	364	297	222	202	88		88	202	222	297	364	513	1615	114	20	75	67	149	1102	1527		0.0746562	0.0130976	0.0491159	0.0438769	0.0975769	0.721676		0	0	0	0	0	1		0	0	0	0	0	1		0	0	0	0	0
JU064429	25	269	315	495	668	1077	633		25	269	315	495	633	668	1077	244	46	180	138	35	409	1052		0.231939	0.0437262	0.171103	0.131179	0.03327	0.388783		0	0	0	0	0	0		0	0	0	0	0	0		0	0	0	0	0
JU065538	25	0	48	66	0	807	1384		0	0	25	48	66	807	1384	0	25	23	18	741	577	1384		0	0.0180636	0.0166185	0.0130058	0.535405	0.416908		0	0	0	0	1	0		0	0	0	0	0	0		0	0	0	0	0
JU062708	0	568	558	627	980	875	220		0	220	558	568	627	875	980	220	338	10	59	248	105	980		0.22449	0.344898	0.0102041	0.0602041	0.253061	0.107143		0	0	0	0	0	0		0	0	0	0	0	0		0	0	0	0	0
JU062699	334	1226	315	462	668	269	162		162	269	315	334	462	668	1226	107	46	19	128	206	558	1064		0.100564	0.0432331	0.0178571	0.120301	0.193609	0.524436		0	0	0	0	0	1		0	0	0	0	0	0		0	0	0	0	0
JU071605	796	299	437	165	267	403	515		165	267	299	403	437	515	796	102	32	104	34	78	281	631		0.161648	0.0507132	0.164818	0.0538827	0.123613	0.445325		0	0	0	0	0	0		0	0	0	0	0	0		0	0	0	0	0
JU062852	102	807	558	792	267	269	323		102	267	269	323	558	792	807	165	2	54	235	234	15	705		0.234043	0.00283688	0.0765957	0.333333	0.331915	0.0212766		0	0	0	0	0	0		0	0	0	0	0	0		0	0	0	0	0
contig1565	128	748	461	924	534	740	132		128	132	461	534	740	748	924	4	329	73	206	8	176	796		0.00502513	0.413317	0.0917085	0.258794	0.0100503	0.221106		0	0	0	0	0	0		0	0	0	0	0	0		0	0	0	0	0
JU063405	51	299	194	429	311	336	927		51	194	299	311	336	429	927	143	105	12	25	93	498	876		0.163242	0.119863	0.0136986	0.0285388	0.106164	0.568493		0	0	0	0	0	1		0	0	0	0	0	1		0	0	0	0	0
JU062805	847	299	194	1023	267	202	250		194	202	250	267	299	847	1023	8	48	17	32	548	176	829		0.00965018	0.0579011	0.0205066	0.0386007	0.661037	0.212304		0	0	0	0	1	0		0	0	0	0	1	0		0	0	0	0	0
JU064716	25	538	340	429	534	875	530		25	340	429	530	534	538	875	315	89	101	4	4	337	850		0.370588	0.104706	0.118824	0.00470588	0.00470588	0.396471		0	0	0	0	0	0		0	0	0	0	0	0		0	0	0	0	0
JU063571	719	239	315	1089	445	471	103		103	239	315	445	471	719	1089	136	76	130	26	248	370	986		0.137931	0.0770791	0.131846	0.0263692	0.251521	0.375254		0	0	0	0	0	0		0	0	0	0	0	0		0	0	0	0	0
JU063828	1978	448	72	165	133	0	44		0	44	72	133	165	448	1978	44	28	61	32	283	1530	1978		0.0222447	0.0141557	0.0308392	0.016178	0.143074	0.773509		0	0	0	0	0	1		0	0	0	0	0	1		0	0	0	0	0
JU063050	0	1047	0	132	1114	471	515		0	0	132	471	515	1047	1114	0	132	339	44	532	67	1114		0	0.118492	0.304309	0.0394973	0.477558	0.0601436		0	0	0	0	0	0		0	0	0	0	0	0		0	0	0	0	0
JU063294	873	658	534	462	267	134	88		88	134	267	462	534	658	873	46	133	195	72	124	215	785		0.0585987	0.169427	0.248408	0.0917197	0.157962	0.273885		0	0	0	0	0	0		0	0	0	0	0	0		0	0	0	0	0
JU062920	0	299	607	891	133	471	471		0	133	299	471	471	607	891	133	166	172	0	136	284	891		0.14927	0.186308	0.193042	0	0.152637	0.318743		0	0	0	0	0	0		0	0	0	0	0	0		0	0	0	0	0
JU063643	154	119	340	990	267	807	471		119	154	267	340	471	807	990	35	113	73	131	336	183	871		0.0401837	0.129736	0.0838117	0.150402	0.385763	0.210103		0	0	0	0	0	0		0	0	0	0	0	0		0	0	0	0	0
JU064904	411	179	145	462	623	336	633		145	179	336	411	462	623	633	34	157	75	51	161	10	488		0.0696721	0.321721	0.153689	0.104508	0.329918	0.0204918		0	0	0	0	0	0		0	0	0	0	0	0		0	0	0	0	0
JU071562	0	389	680	1815	222	134	14		0	14	134	222	389	680	1815	14	120	88	167	291	1135	1815		0.0077135	0.0661157	0.0484848	0.092011	0.160331	0.625344		0	0	0	0	0	1		0	0	0	0	0	1		0	0	0	0	0
JU062681	0	418	194	66	133	1481	809		0	66	133	194	418	809	1481	66	67	61	224	391	672	1481		0.0445645	0.0452397	0.0411884	0.151249	0.264011	0.453747		0	0	0	0	0	0		0	0	0	0	0	0		0	0	0	0	0
JU063956	25	418	340	264	668	471	647		25	264	340	418	471	647	668	239	76	78	53	176	21	643		0.371695	0.118196	0.121306	0.0824261	0.273717	0.0326594		0	0	0	0	0	0		0	0	0	0	0	0		0	0	0	0	0
JU062840	179	329	534	165	490	807	515		165	179	329	490	515	534	807	14	150	161	25	19	273	642		0.0218069	0.233645	0.250779	0.0389408	0.029595	0.425234		0	0	0	0	0	0		0	0	0	0	0	0		0	0	0	0	0
JU064125	334	329	437	429	579	134	471		134	329	334	429	437	471	579	195	5	95	8	34	108	445		0.438202	0.011236	0.213483	0.0179775	0.0764045	0.242697		0	0	0	0	0	0		0	0	0	0	0	0		0	0	0	0	0
JU063251	1002	239	291	429	534	403	176		176	239	291	403	429	534	1002	63	52	112	26	105	468	826		0.0762712	0.062954	0.135593	0.031477	0.127119	0.566586		0	0	0	0	0	1		0	0	0	0	0	0		0	0	0	0	0
JU069831	0	538	291	66	980	1548	353		0	66	291	353	538	980	1548	66	225	62	185	442	568	1548		0.0426357	0.145349	0.0400517	0.119509	0.28553	0.366925		0	0	0	0	0	0		0	0	0	0	0	0		0	0	0	0	0
JU063908	693	568	388	231	935	471	44		44	231	388	471	568	693	935	187	157	83	97	125	242	891		0.209877	0.176207	0.0931538	0.108866	0.140292	0.271605		0	0	0	0	0	0		0	0	0	0	0	0		0	0	0	0	0
JU064471	77	179	218	165	178	471	971		77	165	178	179	218	471	971	88	13	1	39	253	500	894		0.098434	0.0145414	0.00111857	0.0436242	0.282998	0.559284		0	0	0	0	0	1		0	0	0	0	0	0		0	0	0	0	0
JU062750	924	269	388	264	668	403	147		147	264	269	388	403	668	924	117	5	119	15	265	256	777		0.150579	0.00643501	0.153153	0.019305	0.341055	0.329472		0	0	0	0	0	0		0	0	0	0	0	0		0	0	0	0	0
JU063829	179	418	97	99	267	269	898		97	99	179	267	269	418	898	2	80	88	2	149	480	801		0.00249688	0.0998752	0.109863	0.00249688	0.186017	0.599251		0	0	0	0	0	1		0	0	0	0	0	1		0	0	0	0	0
JU065263	25	448	267	495	356	403	633		25	267	356	403	448	495	633	242	89	47	45	47	138	608		0.398026	0.146382	0.0773026	0.0740132	0.0773026	0.226974		0	0	0	0	0	0		0	0	0	0	0	0		0	0	0	0	0
JU064818	359	448	413	198	178	134	589		134	178	198	359	413	448	589	44	20	161	54	35	141	455		0.0967033	0.043956	0.353846	0.118681	0.0769231	0.30989		0	0	0	0	0	0		0	0	0	0	0	0		0	0	0	0	0
JU068158	0	29	24	0	133	0	1369		0	0	0	24	29	133	1369	0	0	24	5	104	1236	1369		0	0	0.017531	0.0036523	0.0759679	0.902849		0	0	0	0	0	1		0	0	0	0	0	1		0	0	0	0	0
JU063067	1181	508	364	462	222	58	0		0	58	222	364	462	508	1181	58	164	142	98	46	673	1181		0.0491109	0.138865	0.120237	0.0829805	0.03895	0.569856		0	0	0	0	0	1		0	0	0	0	0	1		0	0	0	0	0
JU065434	69	515	354	365	332	1127	411		69	332	354	365	411	515	1127	263	22	11	46	104	612	1058		0.248582	0.020794	0.010397	0.0434783	0.0982987	0.57845		0	0	0	0	0	1		0	0	0	0	0	1		0	0	0	0	0
JU063711	0	418	510	264	891	336	427		0	264	336	418	427	510	891	264	72	82	9	83	381	891		0.296296	0.0808081	0.0920314	0.010101	0.0931538	0.427609		0	0	0	0	0	0		0	0	0	0	0	0		0	0	0	0	0
JU062802	51	89	850	0	356	202	677		0	51	89	202	356	677	850	51	38	113	154	321	173	850		0.06	0.0447059	0.132941	0.181176	0.377647	0.203529		0	0	0	0	0	0		0	0	0	0	0	0		0	0	0	0	0
JU063986	154	389	364	231	846	403	456		154	231	364	389	403	456	846	77	133	25	14	53	390	692		0.111272	0.192197	0.0361272	0.0202312	0.0765896	0.563584		0	0	0	0	0	1		0	0	0	0	0	0		0	0	0	0	0
JU065483	2158	269	24	33	89	0	0		0	0	24	33	89	269	2158	0	24	9	56	180	1889	2158		0	0.0111214	0.00417053	0.02595	0.0834106	0.875348		0	0	0	0	0	1		0	0	0	0	0	1		0	0	0	0	0
JU064807	256	748	437	561	445	202	191		191	202	256	437	445	561	748	11	54	181	8	116	187	557		0.0197487	0.0969479	0.324955	0.0143627	0.208259	0.335727		0	0	0	0	0	0		0	0	0	0	0	0		0	0	0	0	0
JU071755	770	478	267	561	490	134	132		132	134	267	478	490	561	770	2	133	211	12	71	209	638		0.0031348	0.208464	0.330721	0.0188088	0.111285	0.327586		0	0	0	0	0	0		0	0	0	0	0	0		0	0	0	0	0
JU062765	154	598	413	330	1203	202	176		154	176	202	330	413	598	1203	22	26	128	83	185	605	1049		0.0209724	0.0247855	0.122021	0.079123	0.176358	0.57674		0	0	0	0	0	1		0	0	0	0	0	1		0	0	0	0	0
JU071677	154	179	121	297	222	134	912		121	134	154	179	222	297	912	13	20	25	43	75	615	791		0.0164349	0.0252845	0.0316056	0.0543616	0.0948167	0.777497		0	0	0	0	0	1		0	0	0	0	0	1		0	0	0	0	0
JU063243	0	299	194	33	44	1413	795		0	33	44	194	299	795	1413	33	11	150	105	496	618	1413		0.0233546	0.00778485	0.106157	0.07431	0.351026	0.437367		0	0	0	0	0	0		0	0	0	0	0	0		0	0	0	0	0
JU063835	154	359	243	627	222	1009	412		154	222	243	359	412	627	1009	68	21	116	53	215	382	855		0.0795322	0.0245614	0.135673	0.0619883	0.251462	0.446784		0	0	0	0	0	0		0	0	0	0	0	0		0	0	0	0	0
JU071220	0	0	0	0	0	0	1384		0	0	0	0	0	0	1384	0	0	0	0	0	1384	1384		0	0	0	0	0	1		0	0	0	0	0	1		0	0	0	0	0	1		0	0	0	0	0
JU064141	154	598	170	264	579	740	412		154	170	264	412	579	598	740	16	94	148	167	19	142	586		0.0273038	0.16041	0.25256	0.284983	0.0324232	0.242321		0	0	0	0	0	0		0	0	0	0	0	0		0	0	0	0	0
JU062938	0	0	0	66	0	0	1339		0	0	0	0	0	66	1339	0	0	0	0	66	1273	1339		0	0	0	0	0.0492905	0.950709		0	0	0	0	0	1		0	0	0	0	0	1		0	0	0	0	0
JU071183	0	29	24	0	0	0	1339		0	0	0	0	24	29	1339	0	0	0	24	5	1310	1339		0	0	0	0.0179238	0.00373413	0.978342		0	0	0	0	0	1		0	0	0	0	0	1		0	0	0	0	0
JU065397	282	239	291	462	401	1750	191		191	239	282	291	401	462	1750	48	43	9	110	61	1288	1559		0.030789	0.0275818	0.00577293	0.0705581	0.0391276	0.826171		0	0	0	0	0	1		0	0	0	0	0	1		0	0	0	0	0
JU067070	0	0	24	33	0	0	1325		0	0	0	0	24	33	1325	0	0	0	24	9	1292	1325		0	0	0	0.0181132	0.00679245	0.975094		0	0	0	0	0	1		0	0	0	0	0	1		0	0	0	0	0
JU071633	642	628	485	231	534	67	88		67	88	231	485	534	628	642	21	143	254	49	94	14	575		0.0365217	0.248696	0.441739	0.0852174	0.163478	0.0243478		0	0	0	0	0	0		0	0	0	0	0	0		0	0	0	0	0
JU062811	1490	329	291	165	178	134	0		0	134	165	178	291	329	1490	134	31	13	113	38	1161	1490		0.0899329	0.0208054	0.00872483	0.0758389	0.0255034	0.779195		0	0	0	0	0	1		0	0	0	0	0	1		0	0	0	0	0
JU062745	128	239	243	462	490	673	485		128	239	243	462	485	490	673	111	4	219	23	5	183	545		0.20367	0.00733945	0.401835	0.0422018	0.00917431	0.33578		0	0	0	0	0	0		0	0	0	0	0	0		0	0	0	0	0
JU066238	0	389	753	1122	133	538	29		0	29	133	389	538	753	1122	29	104	256	149	215	369	1122		0.0258467	0.0926916	0.228164	0.132799	0.191622	0.328877		0	0	0	0	0	0		0	0	0	0	0	0		0	0	0	0	0
JU071579	282	508	267	165	267	269	544		165	267	267	269	282	508	544	102	0	2	13	226	36	379		0.269129	0	0.00527704	0.0343008	0.596306	0.0949868		0	0	0	0	1	0		0	0	0	0	1	0		0	0	0	0	0
JU064176	385	299	170	297	178	202	618		170	178	202	297	299	385	618	8	24	95	2	86	233	448		0.0178571	0.0535714	0.212054	0.00446429	0.191964	0.520089		0	0	0	0	0	1		0	0	0	0	0	0		0	0	0	0	0
JU063979	205	239	97	330	356	403	677		97	205	239	330	356	403	677	108	34	91	26	47	274	580		0.186207	0.0586207	0.156897	0.0448276	0.0810345	0.472414		0	0	0	0	0	0		0	0	0	0	0	0		0	0	0	0	0
JU071245	0	448	218	363	623	1009	382		0	218	363	382	448	623	1009	218	145	19	66	175	386	1009		0.216056	0.143707	0.0188305	0.0654113	0.173439	0.382557		0	0	0	0	0	0		0	0	0	0	0	0		0	0	0	0	0
JU064579	25	389	461	528	401	336	397		25	336	389	397	401	461	528	311	53	8	4	60	67	503		0.61829	0.105368	0.0159046	0.00795229	0.119284	0.133201		1	0	0	0	0	0		1	0	0	0	0	0		0	0	0	0	0
JU071631	1027	389	170	231	178	403	176		170	176	178	231	389	403	1027	6	2	53	158	14	624	857		0.00700117	0.00233372	0.0618436	0.184364	0.0163361	0.728121		0	0	0	0	0	1		0	0	0	0	0	1		0	0	0	0	0
JU071717	539	179	218	132	133	67	662		67	132	133	179	218	539	662	65	1	46	39	321	123	595		0.109244	0.00168067	0.0773109	0.0655462	0.539496	0.206723		0	0	0	0	1	0		0	0	0	0	0	0		0	0	0	0	0
JU068813	436	359	461	1254	89	67	0		0	67	89	359	436	461	1254	67	22	270	77	25	793	1254		0.053429	0.0175439	0.215311	0.0614035	0.0199362	0.632376		0	0	0	0	0	1		0	0	0	0	0	1		0	0	0	0	0
JU071567	0	59	0	0	0	0	1281		0	0	0	0	0	59	1281	0	0	0	0	59	1222	1281		0	0	0	0	0.0460578	0.953942		0	0	0	0	0	1		0	0	0	0	0	1		0	0	0	0	0
JU071667	0	418	461	627	222	471	368		0	222	368	418	461	471	627	222	146	50	43	10	156	627		0.354067	0.232855	0.0797448	0.0685805	0.015949	0.248804		0	0	0	0	0	0		0	0	0	0	0	0		0	0	0	0	0
JU062892	1104	209	364	396	267	202	44		44	202	209	267	364	396	1104	158	7	58	97	32	708	1060		0.149057	0.00660377	0.054717	0.0915094	0.0301887	0.667925		0	0	0	0	0	1		0	0	0	0	0	1		0	0	0	0	0
JU064136	256	1077	121	66	267	269	382		66	121	256	267	269	382	1077	55	135	11	2	113	695	1011		0.0544016	0.133531	0.0108803	0.00197824	0.111771	0.687438		0	0	0	0	0	1		0	0	0	0	0	1		0	0	0	0	0
JU066329	1284	209	267	231	311	202	44		44	202	209	231	267	311	1284	158	7	22	36	44	973	1240		0.127419	0.00564516	0.0177419	0.0290323	0.0354839	0.784677		0	0	0	0	0	1		0	0	0	0	0	1		0	0	0	0	0
JU062836	0	209	510	825	311	269	353		0	209	269	311	353	510	825	209	60	42	42	157	315	825		0.253333	0.0727273	0.0509091	0.0509091	0.190303	0.381818		0	0	0	0	0	0		0	0	0	0	0	0		0	0	0	0	0
JU064164	590	359	267	165	89	134	485		89	134	165	267	359	485	590	45	31	102	92	126	105	501		0.0898204	0.0618762	0.203593	0.183633	0.251497	0.209581		0	0	0	0	0	0		0	0	0	0	0	0		0	0	0	0	0
JU064782	51	658	121	264	311	471	530		51	121	264	311	471	530	658	70	143	47	160	59	128	607		0.115321	0.235585	0.07743	0.263591	0.0971993	0.210873		0	0	0	0	0	0		0	0	0	0	0	0		0	0	0	0	0
JU064212	0	418	631	792	178	538	162		0	162	178	418	538	631	792	162	16	240	120	93	161	792		0.204545	0.020202	0.30303	0.151515	0.117424	0.203283		0	0	0	0	0	0		0	0	0	0	0	0		0	0	0	0	0
JU062999	0	29	0	0	0	0	1266		0	0	0	0	0	29	1266	0	0	0	0	29	1237	1266		0	0	0	0	0.0229068	0.977093		0	0	0	0	0	1		0	0	0	0	0	1		0	0	0	0	0
JU071710	0	29	0	0	0	0	1266		0	0	0	0	0	29	1266	0	0	0	0	29	1237	1266		0	0	0	0	0.0229068	0.977093		0	0	0	0	0	1		0	0	0	0	0	1		0	0	0	0	0
JU064041	334	628	461	297	713	67	117		67	117	297	334	461	628	713	50	180	37	127	167	85	646		0.0773994	0.278638	0.0572755	0.196594	0.258514	0.131579		0	0	0	0	0	0		0	0	0	0	0	0		0	0	0	0	0
JU062770	25	329	607	165	891	403	279		25	165	279	329	403	607	891	140	114	50	74	204	284	866		0.161663	0.13164	0.0577367	0.0854503	0.235566	0.327945		0	0	0	0	0	0		0	0	0	0	0	0		0	0	0	0	0
JU071625	359	538	364	363	445	134	250		134	250	359	363	364	445	538	116	109	4	1	81	93	404		0.287129	0.269802	0.00990099	0.00247525	0.200495	0.230198		0	0	0	0	0	0		0	0	0	0	0	0		0	0	0	0	0
JU064025	899	299	121	165	133	202	382		121	133	165	202	299	382	899	12	32	37	97	83	517	778		0.0154242	0.0411311	0.0475578	0.124679	0.106684	0.664524		0	0	0	0	0	1		0	0	0	0	0	1		0	0	0	0	0
JU066075	899	239	267	924	178	0	14		0	14	178	239	267	899	924	14	164	61	28	632	25	924		0.0151515	0.177489	0.0660173	0.030303	0.683983	0.0270563		0	0	0	0	1	0		0	0	0	0	1	0		0	0	0	0	1
scaffold515	642	777	340	363	267	134	29		29	134	267	340	363	642	777	105	133	73	23	279	135	748		0.140374	0.177807	0.0975936	0.0307487	0.372995	0.180481		0	0	0	0	0	0		0	0	0	0	0	0		0	0	0	0	0
JU062860	51	149	947	99	222	67	456		51	67	99	149	222	456	947	16	32	50	73	234	491	896		0.0178571	0.0357143	0.0558036	0.0814732	0.261161	0.547991		0	0	0	0	0	1		0	0	0	0	0	0		0	0	0	0	0
JU063298	0	149	364	132	445	202	706		0	132	149	202	364	445	706	132	17	53	162	81	261	706		0.186969	0.0240793	0.0750708	0.229462	0.114731	0.369688		0	0	0	0	0	0		0	0	0	0	0	0		0	0	0	0	0
JU071691	1079	209	97	165	89	336	294		89	97	165	209	294	336	1079	8	68	44	85	42	743	990		0.00808081	0.0686869	0.0444444	0.0858586	0.0424242	0.750505		0	0	0	0	0	1		0	0	0	0	0	1		0	0	0	0	0
JU062675	0	0	0	0	44	0	1236		0	0	0	0	0	44	1236	0	0	0	0	44	1192	1236		0	0	0	0	0.0355987	0.964401		0	0	0	0	0	1		0	0	0	0	0	1		0	0	0	0	0
JU064105	128	269	437	561	222	269	397		128	222	269	269	397	437	561	94	47	0	128	40	124	433		0.21709	0.108545	0	0.295612	0.0923788	0.286374		0	0	0	0	0	0		0	0	0	0	0	0		0	0	0	0	0
JU069689	205	418	291	495	668	875	117		117	205	291	418	495	668	875	88	86	127	77	173	207	758		0.116095	0.113456	0.167546	0.101583	0.228232	0.273087		0	0	0	0	0	0		0	0	0	0	0	0		0	0	0	0	0
JU062810	385	598	243	462	623	269	103		103	243	269	385	462	598	623	140	26	116	77	136	25	520		0.269231	0.05	0.223077	0.148077	0.261538	0.0480769		0	0	0	0	0	0		0	0	0	0	0	0		0	0	0	0	0
JU063612	0	0	0	0	0	134	1207		0	0	0	0	0	134	1207	0	0	0	0	134	1073	1207		0	0	0	0	0.111019	0.888981		0	0	0	0	0	1		0	0	0	0	0	1		0	0	0	0	0
JU062741	0	418	340	363	311	134	530		0	134	311	340	363	418	530	134	177	29	23	55	112	530		0.25283	0.333962	0.054717	0.0433962	0.103774	0.211321		0	0	0	0	0	0		0	0	0	0	0	0		0	0	0	0	0
JU062985	0	478	534	1089	534	67	0		0	0	67	478	534	534	1089	0	67	411	56	0	555	1089		0	0.0615243	0.37741	0.0514233	0	0.509642		0	0	0	0	0	1		0	0	0	0	0	0		0	0	0	0	0
JU062945	179	179	388	429	178	673	412		178	179	179	388	412	429	673	1	0	209	24	17	244	495		0.0020202	0	0.422222	0.0484848	0.0343434	0.492929		0	0	0	0	0	0		0	0	0	0	0	0		0	0	0	0	0
JU069838	51	448	194	330	579	471	412		51	194	330	412	448	471	579	143	136	82	36	23	108	528		0.270833	0.257576	0.155303	0.0681818	0.0435606	0.204545		0	0	0	0	0	0		0	0	0	0	0	0		0	0	0	0	0
JU071743	0	299	656	693	311	202	220		0	202	220	299	311	656	693	202	18	79	12	345	37	693		0.291486	0.025974	0.113997	0.017316	0.497835	0.0533911		0	0	0	0	0	0		0	0	0	0	0	0		0	0	0	0	0
JU066682	0	568	704	429	713	403	0		0	0	403	429	568	704	713	0	403	26	139	136	9	713		0	0.565217	0.0364656	0.194951	0.190743	0.0126227		0	1	0	0	0	0		0	0	0	0	0	0		0	0	0	0	0
JU069775	0	29	0	0	0	0	1207		0	0	0	0	0	29	1207	0	0	0	0	29	1178	1207		0	0	0	0	0.0240265	0.975973		0	0	0	0	0	1		0	0	0	0	0	1		0	0	0	0	0
JU062778	77	389	534	198	178	336	441		77	178	198	336	389	441	534	101	20	138	53	52	93	457		0.221007	0.0437637	0.301969	0.115974	0.113786	0.203501		0	0	0	0	0	0		0	0	0	0	0	0		0	0	0	0	0
JU064422	513	478	291	627	445	202	44		44	202	291	445	478	513	627	158	89	154	33	35	114	583		0.271012	0.152659	0.264151	0.0566038	0.0600343	0.19554		0	0	0	0	0	0		0	0	0	0	0	0		0	0	0	0	0
JU065831	616	239	267	396	178	202	294		178	202	239	267	294	396	616	24	37	28	27	102	220	438		0.0547945	0.0844749	0.0639269	0.0616438	0.232877	0.502283		0	0	0	0	0	0		0	0	0	0	0	0		0	0	0	0	0
JU062984	0	29	48	198	0	471	957		0	0	29	48	198	471	957	0	29	19	150	273	486	957		0	0.030303	0.0198537	0.15674	0.285266	0.507837		0	0	0	0	0	1		0	0	0	0	0	0		0	0	0	0	0
JU063663	51	59	194	627	89	202	662		51	59	89	194	202	627	662	8	30	105	8	425	35	611		0.0130933	0.0490998	0.171849	0.0130933	0.695581	0.0572831		0	0	0	0	1	0		0	0	0	0	1	0		0	0	0	0	1
contig7673	822	329	510	363	89	269	0		0	89	269	329	363	510	822	89	180	60	34	147	312	822		0.108273	0.218978	0.0729927	0.0413625	0.178832	0.379562		0	0	0	0	0	0		0	0	0	0	0	0		0	0	0	0	0
JU062841	796	568	267	264	222	134	73		73	134	222	264	267	568	796	61	88	42	3	301	228	723		0.0843707	0.121715	0.0580913	0.00414938	0.416321	0.315353		0	0	0	0	0	0		0	0	0	0	0	0		0	0	0	0	0
JU062807	77	538	267	462	401	269	309		77	267	269	309	401	462	538	190	2	40	92	61	76	461		0.412148	0.00433839	0.0867679	0.199566	0.132321	0.164859		0	0	0	0	0	0		0	0	0	0	0	0		0	0	0	0	0
JU063004	0	448	388	429	267	1279	162		0	162	267	388	429	448	1279	162	105	121	41	19	831	1279		0.126661	0.0820954	0.0946052	0.0320563	0.0148554	0.649726		0	0	0	0	0	1		0	0	0	0	0	1		0	0	0	0	0
JU068682	0	0	0	0	0	67	1163		0	0	0	0	0	67	1163	0	0	0	0	67	1096	1163		0	0	0	0	0.0576096	0.94239		0	0	0	0	0	1		0	0	0	0	0	1		0	0	0	0	0
JU067932	0	0	0	33	0	0	1148		0	0	0	0	0	33	1148	0	0	0	0	33	1115	1148		0	0	0	0	0.0287456	0.971254		0	0	0	0	0	1		0	0	0	0	0	1		0	0	0	0	0
JU071660	102	119	704	429	222	403	250		102	119	222	250	403	429	704	17	103	28	153	26	275	602		0.0282392	0.171096	0.0465116	0.254153	0.0431894	0.456811		0	0	0	0	0	0		0	0	0	0	0	0		0	0	0	0	0
JU064089	0	568	485	198	445	1077	103		0	103	198	445	485	568	1077	103	95	247	40	83	509	1077		0.095636	0.088208	0.229341	0.0371402	0.0770659	0.472609		0	0	0	0	0	0		0	0	0	0	0	0		0	0	0	0	0
JU063073	513	688	121	528	356	0	88		0	88	121	356	513	528	688	88	33	235	157	15	160	688		0.127907	0.0479651	0.34157	0.228198	0.0218023	0.232558		0	0	0	0	0	0		0	0	0	0	0	0		0	0	0	0	0
JU064788	1336	149	243	132	44	0	73		0	44	73	132	149	243	1336	44	29	59	17	94	1093	1336		0.0329341	0.0217066	0.0441617	0.0127246	0.0703593	0.818114		0	0	0	0	0	1		0	0	0	0	0	1		0	0	0	0	0
JU064339	25	269	121	330	267	0	662		0	25	121	267	269	330	662	25	96	146	2	61	332	662		0.0377644	0.145015	0.220544	0.00302115	0.092145	0.501511		0	0	0	0	0	0		0	0	0	0	0	0		0	0	0	0	0
JU063000	0	389	826	231	401	807	14		0	14	231	389	401	807	826	14	217	158	12	406	19	826		0.0169492	0.262712	0.191283	0.0145278	0.491525	0.0230024		0	0	0	0	0	0		0	0	0	0	0	0		0	0	0	0	0
JU063980	282	359	145	165	222	538	427		145	165	222	282	359	427	538	20	57	60	77	68	111	393		0.0508906	0.145038	0.152672	0.195929	0.173028	0.282443		0	0	0	0	0	0		0	0	0	0	0	0		0	0	0	0	0
JU070713	0	0	0	0	0	0	1119		0	0	0	0	0	0	1119	0	0	0	0	0	1119	1119		0	0	0	0	0	1		0	0	0	0	0	1		0	0	0	0	0	1		0	0	0	0	0
JU065536	1464	209	97	198	89	0	0		0	0	89	97	198	209	1464	0	89	8	101	11	1255	1464		0	0.0607923	0.00546448	0.0689891	0.00751366	0.85724		0	0	0	0	0	1		0	0	0	0	0	1		0	0	0	0	0
JU062965	0	59	121	330	89	67	824		0	59	67	89	121	330	824	59	8	22	32	209	494	824		0.0716019	0.00970874	0.026699	0.038835	0.253641	0.599515		0	0	0	0	0	1		0	0	0	0	0	1		0	0	0	0	0
JU062739	1438	239	0	297	89	0	0		0	0	0	89	239	297	1438	0	0	89	150	58	1141	1438		0	0	0.0618915	0.104312	0.0403338	0.793463		0	0	0	0	0	1		0	0	0	0	0	1		0	0	0	0	0
JU065577	950	389	267	99	267	67	58		58	67	99	267	267	389	950	9	32	168	0	122	561	892		0.0100897	0.0358744	0.188341	0	0.136771	0.628924		0	0	0	0	0	1		0	0	0	0	0	1		0	0	0	0	0
JU066502	179	119	485	165	178	202	471		119	165	178	179	202	471	485	46	13	1	23	269	14	366		0.125683	0.0355191	0.00273224	0.0628415	0.734973	0.0382514		0	0	0	0	1	0		0	0	0	0	1	0		0	0	0	0	1
JU066532	0	149	485	594	891	269	117		0	117	149	269	485	594	891	117	32	120	216	109	297	891		0.131313	0.0359147	0.13468	0.242424	0.122334	0.333333		0	0	0	0	0	0		0	0	0	0	0	0		0	0	0	0	0
JU065482	1721	29	72	99	44	0	0		0	0	29	44	72	99	1721	0	29	15	28	27	1622	1721		0	0.0168507	0.00871586	0.0162696	0.0156886	0.942475		0	0	0	0	0	1		0	0	0	0	0	1		0	0	0	0	0
JU062922	359	239	340	132	178	134	427		132	134	178	239	340	359	427	2	44	61	101	19	68	295		0.00677966	0.149153	0.20678	0.342373	0.0644068	0.230508		0	0	0	0	0	0		0	0	0	0	0	0		0	0	0	0	0
JU062697	411	688	267	627	267	0	0		0	0	267	267	411	627	688	0	267	0	144	216	61	688		0	0.388081	0	0.209302	0.313953	0.0886628		0	0	0	0	0	0		0	0	0	0	0	0		0	0	0	0	0
JU064617	719	478	267	396	222	134	0		0	134	222	267	396	478	719	134	88	45	129	82	241	719		0.18637	0.122392	0.0625869	0.179416	0.114047	0.335188		0	0	0	0	0	0		0	0	0	0	0	0		0	0	0	0	0
JU069370	0	119	413	792	222	673	206		0	119	206	222	413	673	792	119	87	16	191	260	119	792		0.150253	0.109848	0.020202	0.241162	0.328283	0.150253		0	0	0	0	0	0		0	0	0	0	0	0		0	0	0	0	0
JU065679	154	149	315	132	178	67	589		67	132	149	154	178	315	589	65	17	5	24	137	274	522		0.124521	0.032567	0.00957854	0.045977	0.262452	0.524904		0	0	0	0	0	1		0	0	0	0	0	0		0	0	0	0	0
JU065207	1104	149	194	429	133	67	0		0	67	133	149	194	429	1104	67	66	16	45	235	675	1104		0.0606884	0.0597826	0.0144928	0.0407609	0.212862	0.611413		0	0	0	0	0	1		0	0	0	0	0	1		0	0	0	0	0
JU065194	0	359	437	528	445	134	220		0	134	220	359	437	445	528	134	86	139	78	8	83	528		0.253788	0.162879	0.263258	0.147727	0.0151515	0.157197		0	0	0	0	0	0		0	0	0	0	0	0		0	0	0	0	0
JU069748	0	598	437	627	579	202	0		0	0	202	437	579	598	627	0	202	235	142	19	29	627		0	0.322169	0.374801	0.226475	0.030303	0.046252		0	0	0	0	0	0		0	0	0	0	0	0		0	0	0	0	0
JU062676	0	239	364	132	311	403	485		0	132	239	311	364	403	485	132	107	72	53	39	82	485		0.272165	0.220619	0.148454	0.109278	0.0804124	0.169072		0	0	0	0	0	0		0	0	0	0	0	0		0	0	0	0	0
JU062876	0	149	801	429	490	673	14		0	14	149	429	490	673	801	14	135	280	61	183	128	801		0.0174782	0.168539	0.349563	0.0761548	0.228464	0.1598		0	0	0	0	0	0		0	0	0	0	0	0		0	0	0	0	0
JU063632	51	119	315	594	89	202	456		51	89	119	202	315	456	594	38	30	83	113	141	138	543		0.0699816	0.0552486	0.152855	0.208103	0.259669	0.254144		0	0	0	0	0	0		0	0	0	0	0	0		0	0	0	0	0
JU064214	0	29	48	198	133	1750	515		0	29	48	133	198	515	1750	29	19	85	65	317	1235	1750		0.0165714	0.0108571	0.0485714	0.0371429	0.181143	0.705714		0	0	0	0	0	1		0	0	0	0	0	1		0	0	0	0	0
JU064124	0	329	0	0	178	134	824		0	0	0	134	178	329	824	0	0	134	44	151	495	824		0	0	0.162621	0.0533981	0.183252	0.600728		0	0	0	0	0	1		0	0	0	0	0	1		0	0	0	0	0
JU063943	0	418	510	231	623	538	117		0	117	231	418	510	538	623	117	114	187	92	28	85	623		0.187801	0.182986	0.300161	0.147673	0.0449438	0.136437		0	0	0	0	0	0		0	0	0	0	0	0		0	0	0	0	0
JU067668	0	478	170	1056	490	134	58		0	58	134	170	478	490	1056	58	76	36	308	12	566	1056		0.0549242	0.0719697	0.0340909	0.291667	0.0113636	0.535985		0	0	0	0	0	1		0	0	0	0	0	0		0	0	0	0	0
JU062784	0	389	485	660	356	336	88		0	88	336	356	389	485	660	88	248	20	33	96	175	660		0.133333	0.375758	0.030303	0.05	0.145455	0.265152		0	0	0	0	0	0		0	0	0	0	0	0		0	0	0	0	0
JU065415	282	329	437	363	401	134	147		134	147	282	329	363	401	437	13	135	47	34	38	36	303		0.0429043	0.445545	0.155116	0.112211	0.125413	0.118812		0	0	0	0	0	0		0	0	0	0	0	0		0	0	0	0	0
JU063300	822	538	170	198	222	0	44		0	44	170	198	222	538	822	44	126	28	24	316	284	822		0.053528	0.153285	0.0340633	0.0291971	0.384428	0.345499		0	0	0	0	0	0		0	0	0	0	0	0		0	0	0	0	0
JU063196	0	0	0	0	0	0	1045		0	0	0	0	0	0	1045	0	0	0	0	0	1045	1045		0	0	0	0	0	1		0	0	0	0	0	1		0	0	0	0	0	1		0	0	0	0	0
JU062875	0	538	583	198	757	403	0		0	0	198	403	538	583	757	0	198	205	135	45	174	757		0	0.261559	0.270806	0.178336	0.0594452	0.229855		0	0	0	0	0	0		0	0	0	0	0	0		0	0	0	0	0
JU065794	154	359	291	132	178	134	456		132	134	154	178	291	359	456	2	20	24	113	68	97	324		0.00617284	0.0617284	0.0740741	0.348765	0.209877	0.299383		0	0	0	0	0	0		0	0	0	0	0	0		0	0	0	0	0
JU063687	0	407	398	486	374	1008	41		0	41	374	398	407	486	1008	41	333	24	9	79	522	1008		0.0406746	0.330357	0.0238095	0.00892857	0.078373	0.517857		0	0	0	0	0	1		0	0	0	0	0	0		0	0	0	0	0
JU065210	128	119	97	264	579	538	412		97	119	128	264	412	538	579	22	9	136	148	126	41	482		0.0456432	0.0186722	0.282158	0.307054	0.261411	0.0850622		0	0	0	0	0	0		0	0	0	0	0	0		0	0	0	0	0
JU071588	0	149	218	33	445	269	603		0	33	149	218	269	445	603	33	116	69	51	176	158	603		0.0547264	0.192371	0.114428	0.0845771	0.291874	0.262023		0	0	0	0	0	0		0	0	0	0	0	0		0	0	0	0	0
JU066158	282	149	194	297	89	336	441		89	149	194	282	297	336	441	60	45	88	15	39	105	352		0.170455	0.127841	0.25	0.0426136	0.110795	0.298295		0	0	0	0	0	0		0	0	0	0	0	0		0	0	0	0	0
JU071599	128	209	218	198	44	740	456		44	128	198	209	218	456	740	84	70	11	9	238	284	696		0.12069	0.100575	0.0158046	0.012931	0.341954	0.408046		0	0	0	0	0	0		0	0	0	0	0	0		0	0	0	0	0
JU062689	642	329	291	165	178	403	103		103	165	178	291	329	403	642	62	13	113	38	74	239	539		0.115028	0.0241187	0.209647	0.0705009	0.137291	0.443414		0	0	0	0	0	0		0	0	0	0	0	0		0	0	0	0	0
JU064415	205	209	364	495	267	67	265		67	205	209	265	267	364	495	138	4	56	2	97	131	428		0.32243	0.00934579	0.130841	0.0046729	0.226636	0.306075		0	0	0	0	0	0		0	0	0	0	0	0		0	0	0	0	0
JU064122	25	389	145	264	401	269	412		25	145	264	269	389	401	412	120	119	5	120	12	11	387		0.310078	0.307494	0.0129199	0.310078	0.0310078	0.0284238		0	0	0	0	0	0		0	0	0	0	0	0		0	0	0	0	0
JU068310	1567	0	0	0	0	0	117		0	0	0	0	0	117	1567	0	0	0	0	117	1450	1567		0	0	0	0	0.074665	0.925335		0	0	0	0	0	1		0	0	0	0	0	1		0	0	0	0	0
JU066648	1104	119	121	132	222	0	117		0	117	119	121	132	222	1104	117	2	2	11	90	882	1104		0.105978	0.00181159	0.00181159	0.00996377	0.0815217	0.798913		0	0	0	0	0	1		0	0	0	0	0	1		0	0	0	0	0
JU066280	128	209	364	231	534	336	265		128	209	231	265	336	364	534	81	22	34	71	28	170	406		0.199507	0.0541872	0.0837438	0.174877	0.0689655	0.418719		0	0	0	0	0	0		0	0	0	0	0	0		0	0	0	0	0
JU063631	0	389	97	99	757	202	412		0	97	99	202	389	412	757	97	2	103	187	23	345	757		0.128137	0.00264201	0.136063	0.247028	0.0303831	0.455746		0	0	0	0	0	0		0	0	0	0	0	0		0	0	0	0	0
JU066222	128	59	97	99	44	1009	559		44	59	97	99	128	559	1009	15	38	2	29	431	450	965		0.015544	0.0393782	0.00207254	0.0300518	0.446632	0.466321		0	0	0	0	0	0		0	0	0	0	0	0		0	0	0	0	0
JU063142	693	269	243	231	401	67	58		58	67	231	243	269	401	693	9	164	12	26	132	292	635		0.0141732	0.258268	0.0188976	0.0409449	0.207874	0.459843		0	0	0	0	0	0		0	0	0	0	0	0		0	0	0	0	0
JU064857	745	149	243	66	44	202	250		44	66	149	202	243	250	745	22	83	53	41	7	495	701		0.0313837	0.118402	0.0756063	0.0584879	0.00998573	0.706134		0	0	0	0	0	1		0	0	0	0	0	1		0	0	0	0	0
JU062813	51	478	534	363	356	0	117		0	51	117	356	363	478	534	51	66	239	7	115	56	534		0.0955056	0.123596	0.447566	0.0131086	0.215356	0.104869		0	0	0	0	0	0		0	0	0	0	0	0		0	0	0	0	0
JU063593	25	0	0	0	0	0	971		0	0	0	0	0	25	971	0	0	0	0	25	946	971		0	0	0	0	0.0257467	0.974253		0	0	0	0	0	1		0	0	0	0	0	1		0	0	0	0	0
JU071645	0	299	194	627	222	269	309		0	194	222	269	299	309	627	194	28	47	30	10	318	627		0.30941	0.0446571	0.0749601	0.0478469	0.015949	0.507177		0	0	0	0	0	1		0	0	0	0	0	0		0	0	0	0	0
JU064087	128	209	218	396	222	134	397		128	134	209	218	222	396	397	6	75	9	4	174	1	269		0.0223048	0.27881	0.0334572	0.0148699	0.64684	0.00371747		0	0	0	0	1	0		0	0	0	0	1	0		0	0	0	0	0
JU070554	0	59	170	0	445	67	692		0	0	59	67	170	445	692	0	59	8	103	275	247	692		0	0.0852601	0.0115607	0.148844	0.397399	0.356936		0	0	0	0	0	0		0	0	0	0	0	0		0	0	0	0	0
JU062719	0	29	24	33	0	0	942		0	0	0	24	29	33	942	0	0	24	5	4	909	942		0	0	0.0254777	0.00530786	0.00424628	0.964968		0	0	0	0	0	1		0	0	0	0	0	1		0	0	0	0	0
JU063966	231	777	340	528	89	0	0		0	0	89	231	340	528	777	0	89	142	109	188	249	777		0	0.114543	0.182754	0.140283	0.241956	0.320463		0	0	0	0	0	0		0	0	0	0	0	0		0	0	0	0	0
JU062737	0	269	315	264	401	202	353		0	202	264	269	315	353	401	202	62	5	46	38	48	401		0.503741	0.154613	0.0124688	0.114713	0.0947631	0.119701		0	0	0	0	0	0		0	0	0	0	0	0		0	0	0	0	0
JU067956	0	179	24	33	44	605	706		0	24	33	44	179	605	706	24	9	11	135	426	101	706		0.0339943	0.0127479	0.0155807	0.191218	0.603399	0.143059		0	0	0	0	1	0		0	0	0	0	1	0		0	0	0	0	0
scaffold303	488	389	121	231	311	471	117		117	121	231	311	389	471	488	4	110	80	78	82	17	371		0.0107817	0.296496	0.215633	0.210243	0.221024	0.0458221		0	0	0	0	0	0		0	0	0	0	0	0		0	0	0	0	0
JU066009	0	179	24	0	178	67	795		0	0	24	67	178	179	795	0	24	43	111	1	616	795		0	0.0301887	0.0540881	0.139623	0.00125786	0.774843		0	0	0	0	0	1		0	0	0	0	0	1		0	0	0	0	0
JU064793	25	89	218	66	222	269	603		25	66	89	218	222	269	603	41	23	129	4	47	334	578		0.0709343	0.0397924	0.223183	0.00692042	0.0813149	0.577855		0	0	0	0	0	1		0	0	0	0	0	1		0	0	0	0	0
JU062798	924	149	97	330	222	67	58		58	67	97	149	222	330	924	9	30	52	73	108	594	866		0.0103926	0.034642	0.0600462	0.0842956	0.124711	0.685912		0	0	0	0	0	1		0	0	0	0	0	1		0	0	0	0	0
JU062724	0	299	243	627	356	403	176		0	176	243	299	356	403	627	176	67	56	57	47	224	627		0.280702	0.106858	0.0893142	0.0909091	0.0749601	0.357257		0	0	0	0	0	0		0	0	0	0	0	0		0	0	0	0	0
JU066282	924	239	97	132	178	67	117		67	97	117	132	178	239	924	30	20	15	46	61	685	857		0.0350058	0.0233372	0.0175029	0.0536756	0.0711785	0.7993		0	0	0	0	0	1		0	0	0	0	0	1		0	0	0	0	0
JU064632	77	119	267	198	534	336	353		77	119	198	267	336	353	534	42	79	69	69	17	181	457		0.0919037	0.172867	0.150985	0.150985	0.0371991	0.396061		0	0	0	0	0	0		0	0	0	0	0	0		0	0	0	0	0
JU065614	668	59	170	132	0	875	191		0	59	132	170	191	668	875	59	73	38	21	477	207	875		0.0674286	0.0834286	0.0434286	0.024	0.545143	0.236571		0	0	0	0	1	0		0	0	0	0	0	0		0	0	0	0	0
JU070080	0	29	0	0	0	0	942		0	0	0	0	0	29	942	0	0	0	0	29	913	942		0	0	0	0	0.0307856	0.969214		0	0	0	0	0	1		0	0	0	0	0	1		0	0	0	0	0
JU071615	0	29	170	33	44	134	765		0	29	33	44	134	170	765	29	4	11	90	36	595	765		0.0379085	0.00522876	0.0143791	0.117647	0.0470588	0.777778		0	0	0	0	0	1		0	0	0	0	0	1		0	0	0	0	0
JU063321	0	389	413	462	356	807	0		0	0	356	389	413	462	807	0	356	33	24	49	345	807		0	0.44114	0.0408922	0.0297398	0.0607187	0.427509		0	0	0	0	0	0		0	0	0	0	0	0		0	0	0	0	0
JU071609	102	688	121	198	445	269	176		102	121	176	198	269	445	688	19	55	22	71	176	243	586		0.0324232	0.0938567	0.0375427	0.12116	0.300341	0.414676		0	0	0	0	0	0		0	0	0	0	0	0		0	0	0	0	0
JU066479	0	89	413	330	757	202	206		0	89	202	206	330	413	757	89	113	4	124	83	344	757		0.117569	0.149273	0.00528402	0.163804	0.109643	0.454425		0	0	0	0	0	0		0	0	0	0	0	0		0	0	0	0	0
JU063015	770	269	194	99	89	0	162		0	89	99	162	194	269	770	89	10	63	32	75	501	770		0.115584	0.012987	0.0818182	0.0415584	0.0974026	0.650649		0	0	0	0	0	1		0	0	0	0	0	1		0	0	0	0	0
JU062679	0	269	97	132	267	538	471		0	97	132	267	269	471	538	97	35	135	2	202	67	538		0.180297	0.0650558	0.250929	0.00371747	0.375465	0.124535		0	0	0	0	0	0		0	0	0	0	0	0		0	0	0	0	0
JU063691	25	389	315	363	356	403	162		25	162	315	356	363	389	403	137	153	41	7	26	14	378		0.362434	0.404762	0.108466	0.0185185	0.0687831	0.037037		0	0	0	0	0	0		0	0	0	0	0	0		0	0	0	0	0
JU063647	0	119	170	363	534	0	427		0	0	119	170	363	427	534	0	119	51	193	64	107	534		0	0.222846	0.0955056	0.361423	0.11985	0.200375		0	0	0	0	0	0		0	0	0	0	0	0		0	0	0	0	0
JU071443	0	0	0	0	0	134	898		0	0	0	0	0	134	898	0	0	0	0	134	764	898		0	0	0	0	0.14922	0.85078		0	0	0	0	0	1		0	0	0	0	0	1		0	0	0	0	0
JU063578	0	359	437	330	311	336	162		0	162	311	330	336	359	437	162	149	19	6	23	78	437		0.370709	0.340961	0.0434783	0.01373	0.0526316	0.17849		0	0	0	0	0	0		0	0	0	0	0	0		0	0	0	0	0
JU062799	359	478	510	99	178	67	58		58	67	99	178	359	478	510	9	32	79	181	119	32	452		0.0199115	0.0707965	0.174779	0.400442	0.263274	0.0707965		0	0	0	0	0	0		0	0	0	0	0	0		0	0	0	0	0
JU064633	128	418	145	165	178	1009	206		128	145	165	178	206	418	1009	17	20	13	28	212	591	881		0.0192963	0.0227015	0.014756	0.0317821	0.240636	0.670829		0	0	0	0	0	1		0	0	0	0	0	1		0	0	0	0	0
JU071582	205	119	388	363	89	269	265		89	119	205	265	269	363	388	30	86	60	4	94	25	299		0.100334	0.287625	0.200669	0.0133779	0.314381	0.083612		0	0	0	0	0	0		0	0	0	0	0	0		0	0	0	0	0
JU063343	0	269	583	264	623	471	0		0	0	264	269	471	583	623	0	264	5	202	112	40	623		0	0.423756	0.00802568	0.324238	0.179775	0.0642055		0	0	0	0	0	0		0	0	0	0	0	0		0	0	0	0	0
JU065307	0	0	0	0	0	0	912		0	0	0	0	0	0	912	0	0	0	0	0	912	912		0	0	0	0	0	1		0	0	0	0	0	1		0	0	0	0	0	1		0	0	0	0	0
JU071661	0	59	72	363	133	1279	353		0	59	72	133	353	363	1279	59	13	61	220	10	916	1279		0.0461298	0.0101642	0.0476935	0.172009	0.00781861	0.716185		0	0	0	0	0	1		0	0	0	0	0	1		0	0	0	0	0
JU062958	0	389	291	264	44	1009	191		0	44	191	264	291	389	1009	44	147	73	27	98	620	1009		0.0436075	0.145689	0.0723489	0.0267592	0.0971259	0.61447		0	0	0	0	0	1		0	0	0	0	0	1		0	0	0	0	0
JU063783	205	359	218	132	311	134	294		132	134	205	218	294	311	359	2	71	13	76	17	48	227		0.00881057	0.312775	0.0572687	0.334802	0.0748899	0.211454		0	0	0	0	0	0		0	0	0	0	0	0		0	0	0	0	0
JU064132	359	329	291	495	178	134	58		58	134	178	291	329	359	495	76	44	113	38	30	136	437		0.173913	0.100686	0.258581	0.0869565	0.0686499	0.311213		0	0	0	0	0	0		0	0	0	0	0	0		0	0	0	0	0
JU064128	488	179	170	726	89	269	29		29	89	170	179	269	488	726	60	81	9	90	219	238	697		0.0860832	0.116212	0.0129125	0.129125	0.314204	0.341463		0	0	0	0	0	0		0	0	0	0	0	0		0	0	0	0	0
JU064142	223	217	288	273	166	178	274		166	178	217	223	273	274	288	12	39	6	50	1	14	122		0.0983607	0.319672	0.0491803	0.409836	0.00819672	0.114754		0	0	0	0	0	0		0	0	0	0	0	0		0	0	0	0	0
JU067178	0	239	534	429	222	134	162		0	134	162	222	239	429	534	134	28	60	17	190	105	534		0.250936	0.0524345	0.11236	0.0318352	0.355805	0.196629		0	0	0	0	0	0		0	0	0	0	0	0		0	0	0	0	0
JU071023	0	0	0	0	0	0	898		0	0	0	0	0	0	898	0	0	0	0	0	898	898		0	0	0	0	0	1		0	0	0	0	0	1		0	0	0	0	0	1		0	0	0	0	0
JU064177	77	59	218	198	222	0	530		0	59	77	198	218	222	530	59	18	121	20	4	308	530		0.111321	0.0339623	0.228302	0.0377358	0.00754717	0.581132		0	0	0	0	0	1		0	0	0	0	0	1		0	0	0	0	0
JU063054	0	89	145	231	490	1077	265		0	89	145	231	265	490	1077	89	56	86	34	225	587	1077		0.082637	0.0519963	0.0798514	0.0315692	0.208914	0.545032		0	0	0	0	0	1		0	0	0	0	0	0		0	0	0	0	0
JU064139	102	119	315	330	178	336	309		102	119	178	309	315	330	336	17	59	131	6	15	6	234		0.0726496	0.252137	0.559829	0.025641	0.0641026	0.025641		0	0	1	0	0	0		0	0	0	0	0	0		0	0	0	0	0
JU071715	0	389	315	264	713	67	147		0	67	147	264	315	389	713	67	80	117	51	74	324	713		0.0939691	0.112202	0.164095	0.0715288	0.103787	0.454418		0	0	0	0	0	0		0	0	0	0	0	0		0	0	0	0	0
JU064140	231	149	461	231	311	67	191		67	149	191	231	231	311	461	82	42	40	0	80	150	394		0.208122	0.106599	0.101523	0	0.203046	0.380711		0	0	0	0	0	0		0	0	0	0	0	0		0	0	0	0	0
JU066270	0	149	583	462	0	269	206		0	0	149	206	269	462	583	0	149	57	63	193	121	583		0	0.255575	0.0977702	0.108062	0.331046	0.207547		0	0	0	0	0	0		0	0	0	0	0	0		0	0	0	0	0
JU067947	0	329	461	264	490	403	88		0	88	264	329	403	461	490	88	176	65	74	58	29	490		0.179592	0.359184	0.132653	0.15102	0.118367	0.0591837		0	0	0	0	0	0		0	0	0	0	0	0		0	0	0	0	0
JU071181	0	119	631	363	490	538	0		0	0	119	363	490	538	631	0	119	244	127	48	93	631		0	0.18859	0.386688	0.201268	0.0760697	0.147385		0	0	0	0	0	0		0	0	0	0	0	0		0	0	0	0	0
JU062873	102	329	364	231	133	269	235		102	133	231	235	269	329	364	31	98	4	34	60	35	262		0.118321	0.374046	0.0152672	0.129771	0.229008	0.133588		0	0	0	0	0	0		0	0	0	0	0	0		0	0	0	0	0
JU069185	0	29	48	99	356	403	589		0	29	48	99	356	403	589	29	19	51	257	47	186	589		0.049236	0.0322581	0.0865874	0.436333	0.0797963	0.315789		0	0	0	0	0	0		0	0	0	0	0	0		0	0	0	0	0
JU065586	51	508	291	363	267	269	117		51	117	267	269	291	363	508	66	150	2	22	72	145	457		0.14442	0.328228	0.00437637	0.04814	0.157549	0.317287		0	0	0	0	0	0		0	0	0	0	0	0		0	0	0	0	0
JU068699	1104	59	48	33	133	0	132		0	33	48	59	132	133	1104	33	15	11	73	1	971	1104		0.0298913	0.013587	0.00996377	0.0661232	0.000905797	0.879529		0	0	0	0	0	1		0	0	0	0	0	1		0	0	0	0	0
JU065692	179	209	291	396	356	336	132		132	179	209	291	336	356	396	47	30	82	45	20	40	264		0.17803	0.113636	0.310606	0.170455	0.0757576	0.151515		0	0	0	0	0	0		0	0	0	0	0	0		0	0	0	0	0
JU063350	0	0	24	0	44	0	839		0	0	0	0	24	44	839	0	0	0	24	20	795	839		0	0	0	0.0286055	0.0238379	0.947557		0	0	0	0	0	1		0	0	0	0	0	1		0	0	0	0	0
JU062869	102	209	340	297	490	471	103		102	103	209	297	340	471	490	1	106	88	43	131	19	388		0.00257732	0.273196	0.226804	0.110825	0.337629	0.0489691		0	0	0	0	0	0		0	0	0	0	0	0		0	0	0	0	0
JU063779	102	359	170	165	267	336	294		102	165	170	267	294	336	359	63	5	97	27	42	23	257		0.245136	0.0194553	0.377432	0.105058	0.163424	0.0894942		0	0	0	0	0	0		0	0	0	0	0	0		0	0	0	0	0
JU062787	25	0	48	33	0	134	780		0	0	25	33	48	134	780	0	25	8	15	86	646	780		0	0.0320513	0.0102564	0.0192308	0.110256	0.828205		0	0	0	0	0	1		0	0	0	0	0	1		0	0	0	0	0
JU065436	154	389	170	132	89	605	265		89	132	154	170	265	389	605	43	22	16	95	124	216	516		0.0833333	0.0426357	0.0310078	0.184109	0.24031	0.418605		0	0	0	0	0	0		0	0	0	0	0	0		0	0	0	0	0
scaffold31	0	89	48	0	0	2221	309		0	0	0	48	89	309	2221	0	0	48	41	220	1912	2221		0	0	0.0216119	0.0184602	0.0990545	0.860873		0	0	0	0	0	1		0	0	0	0	0	1		0	0	0	0	0
JU065871	1233	59	72	165	44	0	0		0	0	44	59	72	165	1233	0	44	15	13	93	1068	1233		0	0.0356853	0.0121655	0.0105434	0.0754258	0.86618		0	0	0	0	0	1		0	0	0	0	0	1		0	0	0	0	0
JU065959	0	359	218	231	222	1077	147		0	147	218	222	231	359	1077	147	71	4	9	128	718	1077		0.13649	0.0659239	0.00371402	0.00835655	0.118849	0.666667		0	0	0	0	0	1		0	0	0	0	0	1		0	0	0	0	0
JU067020	822	239	48	330	222	0	29		0	29	48	222	239	330	822	29	19	174	17	91	492	822		0.0352798	0.0231144	0.211679	0.0206813	0.110706	0.59854		0	0	0	0	0	1		0	0	0	0	0	1		0	0	0	0	0
JU067798	231	359	510	231	133	134	73		73	133	134	231	231	359	510	60	1	97	0	128	151	437		0.1373	0.00228833	0.221968	0	0.292906	0.345538		0	0	0	0	0	0		0	0	0	0	0	0		0	0	0	0	0
JU062931	0	119	485	429	89	673	147		0	89	119	147	429	485	673	89	30	28	282	56	188	673		0.132244	0.0445765	0.0416048	0.419019	0.0832095	0.279346		0	0	0	0	0	0		0	0	0	0	0	0		0	0	0	0	0
JU063633	154	89	218	363	401	0	294		0	89	154	218	294	363	401	89	65	64	76	69	38	401		0.221945	0.162095	0.159601	0.189526	0.17207	0.0947631		0	0	0	0	0	0		0	0	0	0	0	0		0	0	0	0	0
JU071703	0	0	24	165	0	0	765		0	0	0	0	24	165	765	0	0	0	24	141	600	765		0	0	0	0.0313725	0.184314	0.784314		0	0	0	0	0	1		0	0	0	0	0	1		0	0	0	0	0
JU062733	436	269	267	396	222	0	58		0	58	222	267	269	396	436	58	164	45	2	127	40	436		0.133028	0.376147	0.103211	0.00458716	0.291284	0.0917431		0	0	0	0	0	0		0	0	0	0	0	0		0	0	0	0	0
JU063920	0	0	0	0	0	0	854		0	0	0	0	0	0	854	0	0	0	0	0	854	854		0	0	0	0	0	1		0	0	0	0	0	1		0	0	0	0	0	1		0	0	0	0	0
JU064497	0	0	72	66	44	134	736		0	0	44	66	72	134	736	0	44	22	6	62	602	736		0	0.0597826	0.0298913	0.00815217	0.0842391	0.817935		0	0	0	0	0	1		0	0	0	0	0	1		0	0	0	0	0
JU064640	0	329	218	231	356	605	206		0	206	218	231	329	356	605	206	12	13	98	27	249	605		0.340496	0.0198347	0.0214876	0.161983	0.0446281	0.41157		0	0	0	0	0	0		0	0	0	0	0	0		0	0	0	0	0
JU063786	231	89	97	0	89	67	574		0	67	89	89	97	231	574	67	22	0	8	134	343	574		0.116725	0.0383275	0	0.0139373	0.233449	0.597561		0	0	0	0	0	1		0	0	0	0	0	1		0	0	0	0	0
JU071591	102	149	97	165	222	269	456		97	102	149	165	222	269	456	5	47	16	57	47	187	359		0.0139276	0.130919	0.0445682	0.158774	0.130919	0.520891		0	0	0	0	0	1		0	0	0	0	0	0		0	0	0	0	0
JU063053	539	209	218	132	267	134	132		132	132	134	209	218	267	539	0	2	75	9	49	272	407		0	0.004914	0.184275	0.022113	0.120393	0.668305		0	0	0	0	0	1		0	0	0	0	0	1		0	0	0	0	0
JU064961	308	269	267	264	0	269	206		0	206	264	267	269	269	308	206	58	3	2	0	39	308		0.668831	0.188312	0.00974026	0.00649351	0	0.126623		1	0	0	0	0	0		1	0	0	0	0	0		0	0	0	0	0
JU062825	77	29	267	132	178	0	515		0	29	77	132	178	267	515	29	48	55	46	89	248	515		0.0563107	0.0932039	0.106796	0.0893204	0.172816	0.481553		0	0	0	0	0	0		0	0	0	0	0	0		0	0	0	0	0
JU064002	0	239	170	198	401	269	338		0	170	198	239	269	338	401	170	28	41	30	69	63	401		0.42394	0.0698254	0.102244	0.074813	0.17207	0.157107		0	0	0	0	0	0		0	0	0	0	0	0		0	0	0	0	0
JU071638	51	119	97	198	401	269	412		51	97	119	198	269	401	412	46	22	79	71	132	11	361		0.127424	0.0609418	0.218837	0.196676	0.365651	0.0304709		0	0	0	0	0	0		0	0	0	0	0	0		0	0	0	0	0
JU069525	25	29	121	990	133	134	220		25	29	121	133	134	220	990	4	92	12	1	86	770	965		0.00414508	0.0953368	0.0124352	0.00103627	0.0891192	0.797927		0	0	0	0	0	1		0	0	0	0	0	1		0	0	0	0	0
JU071292	0	29	0	0	0	67	809		0	0	0	0	29	67	809	0	0	0	29	38	742	809		0	0	0	0.0358467	0.0469716	0.917182		0	0	0	0	0	1		0	0	0	0	0	1		0	0	0	0	0
JU065632	102	149	340	198	222	134	309		102	134	149	198	222	309	340	32	15	49	24	87	31	238		0.134454	0.0630252	0.205882	0.10084	0.365546	0.130252		0	0	0	0	0	0		0	0	0	0	0	0		0	0	0	0	0
JU066380	0	0	0	0	0	67	824		0	0	0	0	0	67	824	0	0	0	0	67	757	824		0	0	0	0	0.0813107	0.918689		0	0	0	0	0	1		0	0	0	0	0	1		0	0	0	0	0
JU062951	0	59	607	198	311	269	191		0	59	191	198	269	311	607	59	132	7	71	42	296	607		0.0971993	0.217463	0.0115321	0.116969	0.0691928	0.487644		0	0	0	0	0	0		0	0	0	0	0	0		0	0	0	0	0
JU065520	102	239	121	429	44	202	323		44	102	121	202	239	323	429	58	19	81	37	84	106	385		0.150649	0.0493506	0.21039	0.0961039	0.218182	0.275325		0	0	0	0	0	0		0	0	0	0	0	0		0	0	0	0	0
JU063031	51	299	218	132	133	202	368		51	132	133	202	218	299	368	81	1	69	16	81	69	317		0.255521	0.00315457	0.217666	0.0504732	0.255521	0.217666		0	0	0	0	0	0		0	0	0	0	0	0		0	0	0	0	0
JU062870	0	239	243	33	222	134	441		0	33	134	222	239	243	441	33	101	88	17	4	198	441		0.0748299	0.229025	0.199546	0.0385488	0.00907029	0.44898		0	0	0	0	0	0		0	0	0	0	0	0		0	0	0	0	0
JU068301	0	89	218	627	311	942	58		0	58	89	218	311	627	942	58	31	129	93	316	315	942		0.0615711	0.0329087	0.136943	0.0987261	0.335456	0.334395		0	0	0	0	0	0		0	0	0	0	0	0		0	0	0	0	0
JU063275	1310	59	48	33	0	0	0		0	0	0	33	48	59	1310	0	0	33	15	11	1251	1310		0	0	0.0251908	0.0114504	0.00839695	0.954962		0	0	0	0	0	1		0	0	0	0	0	1		0	0	0	0	0
JU062996	0	89	170	33	222	942	382		0	33	89	170	222	382	942	33	56	81	52	160	560	942		0.0350318	0.059448	0.0859873	0.0552017	0.169851	0.59448		0	0	0	0	0	1		0	0	0	0	0	1		0	0	0	0	0
JU067191	0	119	583	594	44	269	73		0	44	73	119	269	583	594	44	29	46	150	314	11	594		0.0740741	0.0488215	0.0774411	0.252525	0.52862	0.0185185		0	0	0	0	1	0		0	0	0	0	0	0		0	0	0	0	0
JU064941	128	59	243	561	133	336	206		59	128	133	206	243	336	561	69	5	73	37	93	225	502		0.13745	0.00996016	0.145418	0.0737052	0.185259	0.448207		0	0	0	0	0	0		0	0	0	0	0	0		0	0	0	0	0
JU069174	0	29	0	132	89	202	677		0	0	29	89	132	202	677	0	29	60	43	70	475	677		0	0.042836	0.0886263	0.0635155	0.103397	0.701625		0	0	0	0	0	1		0	0	0	0	0	1		0	0	0	0	0
JU065623	1053	89	170	66	0	134	0		0	0	66	89	134	170	1053	0	66	23	45	36	883	1053		0	0.0626781	0.0218424	0.042735	0.034188	0.838557		0	0	0	0	0	1		0	0	0	0	0	1		0	0	0	0	0
JU066052	77	269	170	99	311	403	294		77	99	170	269	294	311	403	22	71	99	25	17	92	326		0.0674847	0.217791	0.303681	0.0766871	0.0521472	0.282209		0	0	0	0	0	0		0	0	0	0	0	0		0	0	0	0	0
JU065122	0	359	413	297	401	67	103		0	67	103	297	359	401	413	67	36	194	62	42	12	413		0.162228	0.0871671	0.469734	0.150121	0.101695	0.0290557		0	0	0	0	0	0		0	0	0	0	0	0		0	0	0	0	0
JU066310	0	59	583	198	89	67	294		0	59	67	89	198	294	583	59	8	22	109	96	289	583		0.101201	0.0137221	0.0377358	0.186964	0.164666	0.495712		0	0	0	0	0	0		0	0	0	0	0	0		0	0	0	0	0
JU065292	334	478	267	231	222	134	14		14	134	222	231	267	334	478	120	88	9	36	67	144	464		0.258621	0.189655	0.0193966	0.0775862	0.144397	0.310345		0	0	0	0	0	0		0	0	0	0	0	0		0	0	0	0	0
scaffold437	179	209	364	132	222	269	191		132	179	191	209	222	269	364	47	12	18	13	47	95	232		0.202586	0.0517241	0.0775862	0.0560345	0.202586	0.409483		0	0	0	0	0	0		0	0	0	0	0	0		0	0	0	0	0
JU063967	77	119	194	495	534	67	162		67	77	119	162	194	495	534	10	42	43	32	301	39	467		0.0214133	0.0899358	0.0920771	0.0685225	0.64454	0.0835118		0	0	0	0	1	0		0	0	0	0	1	0		0	0	0	0	0
JU065291	128	59	170	660	133	0	250		0	59	128	133	170	250	660	59	69	5	37	80	410	660		0.0893939	0.104545	0.00757576	0.0560606	0.121212	0.621212		0	0	0	0	0	1		0	0	0	0	0	1		0	0	0	0	0
JU065743	77	149	364	363	222	0	220		0	77	149	220	222	363	364	77	72	71	2	141	1	364		0.211538	0.197802	0.195055	0.00549451	0.387363	0.00274725		0	0	0	0	0	0		0	0	0	0	0	0		0	0	0	0	0
JU071606	0	29	0	33	0	0	765		0	0	0	0	29	33	765	0	0	0	29	4	732	765		0	0	0	0.0379085	0.00522876	0.956863		0	0	0	0	0	1		0	0	0	0	0	1		0	0	0	0	0
JU071750	0	239	97	231	1381	202	14		0	14	97	202	231	239	1381	14	83	105	29	8	1142	1381		0.0101376	0.0601014	0.0760319	0.0209993	0.0057929	0.826937		0	0	0	0	0	1		0	0	0	0	0	1		0	0	0	0	0
JU064715	154	149	315	330	178	67	220		67	149	154	178	220	315	330	82	5	24	42	95	15	263		0.311787	0.0190114	0.0912548	0.159696	0.361217	0.0570342		0	0	0	0	0	0		0	0	0	0	0	0		0	0	0	0	0
JU063919	0	29	218	66	401	269	427		0	29	66	218	269	401	427	29	37	152	51	132	26	427		0.0679157	0.0866511	0.355972	0.119438	0.309133	0.0608899		0	0	0	0	0	0		0	0	0	0	0	0		0	0	0	0	0
JU063609	0	29	0	0	0	0	780		0	0	0	0	0	29	780	0	0	0	0	29	751	780		0	0	0	0	0.0371795	0.962821		0	0	0	0	0	1		0	0	0	0	0	1		0	0	0	0	0
JU064560	0	329	461	363	311	202	44		0	44	202	311	329	363	461	44	158	109	18	34	98	461		0.0954447	0.342733	0.236443	0.0390456	0.0737527	0.212581		0	0	0	0	0	0		0	0	0	0	0	0		0	0	0	0	0
JU064561	128	269	364	627	44	67	58		44	58	67	128	269	364	627	14	9	61	141	95	263	583		0.0240137	0.0154374	0.104631	0.241852	0.16295	0.451115		0	0	0	0	0	0		0	0	0	0	0	0		0	0	0	0	0
JU071681	0	239	97	198	222	403	368		0	97	198	222	239	368	403	97	101	24	17	129	35	403		0.240695	0.25062	0.0595533	0.0421836	0.320099	0.0868486		0	0	0	0	0	0		0	0	0	0	0	0		0	0	0	0	0
JU065471	25	478	291	132	713	134	44		25	44	132	134	291	478	713	19	88	2	157	187	235	688		0.0276163	0.127907	0.00290698	0.228198	0.271802	0.34157		0	0	0	0	0	0		0	0	0	0	0	0		0	0	0	0	0
JU065878	411	179	437	198	89	67	73		67	73	89	179	198	411	437	6	16	90	19	213	26	370		0.0162162	0.0432432	0.243243	0.0513514	0.575676	0.0702703		0	0	0	0	1	0		0	0	0	0	1	0		0	0	0	0	0
JU064592	77	269	194	297	133	403	220		77	133	194	220	269	297	403	56	61	26	49	28	106	326		0.171779	0.187117	0.0797546	0.150307	0.0858896	0.325153		0	0	0	0	0	0		0	0	0	0	0	0		0	0	0	0	0
JU067828	0	0	0	33	0	0	765		0	0	0	0	0	33	765	0	0	0	0	33	732	765		0	0	0	0	0.0431373	0.956863		0	0	0	0	0	1		0	0	0	0	0	1		0	0	0	0	0
JU066136	0	119	145	396	534	202	235		0	119	145	202	235	396	534	119	26	57	33	161	138	534		0.222846	0.0486891	0.106742	0.0617978	0.301498	0.258427		0	0	0	0	0	0		0	0	0	0	0	0		0	0	0	0	0
JU064645	25	329	145	165	445	336	220		25	145	165	220	329	336	445	120	20	55	109	7	109	420		0.285714	0.047619	0.130952	0.259524	0.0166667	0.259524		0	0	0	0	0	0		0	0	0	0	0	0		0	0	0	0	0
JU062721	128	119	340	396	44	538	132		44	119	128	132	340	396	538	75	9	4	208	56	142	494		0.151822	0.0182186	0.00809717	0.421053	0.11336	0.287449		0	0	0	0	0	0		0	0	0	0	0	0		0	0	0	0	0
JU063016	0	59	243	561	44	67	323		0	44	59	67	243	323	561	44	15	8	176	80	238	561		0.0784314	0.026738	0.0142602	0.313725	0.142602	0.424242		0	0	0	0	0	0		0	0	0	0	0	0		0	0	0	0	0
JU065760	0	389	97	165	0	0	456		0	0	0	97	165	389	456	0	0	97	68	224	67	456		0	0	0.212719	0.149123	0.491228	0.14693		0	0	0	0	0	0		0	0	0	0	0	0		0	0	0	0	0
scaffold474	385	508	267	132	89	0	58		0	58	89	132	267	385	508	58	31	43	135	118	123	508		0.114173	0.0610236	0.0846457	0.265748	0.232283	0.242126		0	0	0	0	0	0		0	0	0	0	0	0		0	0	0	0	0
JU062882	0	598	194	0	178	605	162		0	0	162	178	194	598	605	0	162	16	16	404	7	605		0	0.267769	0.0264463	0.0264463	0.667769	0.0115702		0	0	0	0	1	0		0	0	0	0	1	0		0	0	0	0	0
JU069224	0	89	364	231	579	942	0		0	0	89	231	364	579	942	0	89	142	133	215	363	942		0	0.0944798	0.150743	0.141189	0.228238	0.38535		0	0	0	0	0	0		0	0	0	0	0	0		0	0	0	0	0
JU064230	719	149	340	132	44	0	0		0	0	44	132	149	340	719	0	44	88	17	191	379	719		0	0.0611961	0.122392	0.0236439	0.265647	0.527121		0	0	0	0	0	1		0	0	0	0	0	0		0	0	0	0	0
JU071658	77	209	267	132	445	134	220		77	132	134	209	220	267	445	55	2	75	11	47	178	368		0.149457	0.00543478	0.203804	0.0298913	0.127717	0.483696		0	0	0	0	0	0		0	0	0	0	0	0		0	0	0	0	0
scaffold10	462	598	48	66	89	134	88		48	66	88	89	134	462	598	18	22	1	45	328	136	550		0.0327273	0.04	0.00181818	0.0818182	0.596364	0.247273		0	0	0	0	1	0		0	0	0	0	1	0		0	0	0	0	0
JU066753	0	269	267	363	267	67	206		0	67	206	267	267	269	363	67	139	61	0	2	94	363		0.184573	0.38292	0.168044	0	0.00550964	0.258953		0	0	0	0	0	0		0	0	0	0	0	0		0	0	0	0	0
JU065850	205	149	218	429	89	67	206		67	89	149	205	206	218	429	22	60	56	1	12	211	362		0.0607735	0.165746	0.154696	0.00276243	0.0331492	0.582873		0	0	0	0	0	1		0	0	0	0	0	1		0	0	0	0	0
JU065156	359	448	24	132	445	134	88		24	88	132	134	359	445	448	64	44	2	225	86	3	424		0.150943	0.103774	0.00471698	0.53066	0.20283	0.00707547		0	0	0	1	0	0		0	0	0	0	0	0		0	0	0	0	0
JU063359	256	149	267	297	267	336	88		88	149	256	267	267	297	336	61	107	11	0	30	39	248		0.245968	0.431452	0.0443548	0	0.120968	0.157258		0	0	0	0	0	0		0	0	0	0	0	0		0	0	0	0	0
JU062888	25	119	218	297	89	740	220		25	89	119	218	220	297	740	64	30	99	2	77	443	715		0.0895105	0.041958	0.138462	0.0027972	0.107692	0.61958		0	0	0	0	0	1		0	0	0	0	0	1		0	0	0	0	0
JU062753	0	119	24	0	0	134	647		0	0	0	24	119	134	647	0	0	24	95	15	513	647		0	0	0.0370943	0.146832	0.0231839	0.79289		0	0	0	0	0	1		0	0	0	0	0	1		0	0	0	0	0
JU064477	77	568	194	198	178	202	117		77	117	178	194	198	202	568	40	61	16	4	4	366	491		0.0814664	0.124236	0.0325866	0.00814664	0.00814664	0.745418		0	0	0	0	0	1		0	0	0	0	0	1		0	0	0	0	0
JU063748	282	149	194	165	133	202	235		133	149	165	194	202	235	282	16	16	29	8	33	47	149		0.107383	0.107383	0.194631	0.0536913	0.221477	0.315436		0	0	0	0	0	0		0	0	0	0	0	0		0	0	0	0	0
JU062896	77	119	170	132	44	134	441		44	77	119	132	134	170	441	33	42	13	2	36	271	397		0.0831234	0.105793	0.0327456	0.00503778	0.0906801	0.68262		0	0	0	0	0	1		0	0	0	0	0	1		0	0	0	0	0
JU063944	668	179	194	264	89	0	14		0	14	89	179	194	264	668	14	75	90	15	70	404	668		0.0209581	0.112275	0.134731	0.0224551	0.10479	0.60479		0	0	0	0	0	1		0	0	0	0	0	1		0	0	0	0	0
JU064526	205	89	315	231	178	0	235		0	89	178	205	231	235	315	89	89	27	26	4	80	315		0.28254	0.28254	0.0857143	0.0825397	0.0126984	0.253968		0	0	0	0	0	0		0	0	0	0	0	0		0	0	0	0	0
JU064583	1258	29	24	0	0	0	0		0	0	0	0	24	29	1258	0	0	0	24	5	1229	1258		0	0	0	0.0190779	0.00397456	0.976948		0	0	0	0	0	1		0	0	0	0	0	1		0	0	0	0	0
JU066085	0	0	0	0	0	0	750		0	0	0	0	0	0	750	0	0	0	0	0	750	750		0	0	0	0	0	1		0	0	0	0	0	1		0	0	0	0	0	1		0	0	0	0	0
JU071422	0	0	0	0	0	134	706		0	0	0	0	0	134	706	0	0	0	0	134	572	706		0	0	0	0	0.189802	0.810198		0	0	0	0	0	1		0	0	0	0	0	1		0	0	0	0	0
JU066218	0	0	0	33	0	202	677		0	0	0	0	33	202	677	0	0	0	33	169	475	677		0	0	0	0.0487445	0.249631	0.701625		0	0	0	0	0	1		0	0	0	0	0	1		0	0	0	0	0
JU062808	513	359	170	297	89	0	0		0	0	89	170	297	359	513	0	89	81	127	62	154	513		0	0.173489	0.157895	0.247563	0.120858	0.300195		0	0	0	0	0	0		0	0	0	0	0	0		0	0	0	0	0
JU065204	25	0	72	99	222	269	500		0	25	72	99	222	269	500	25	47	27	123	47	231	500		0.05	0.094	0.054	0.246	0.094	0.462		0	0	0	0	0	0		0	0	0	0	0	0		0	0	0	0	0
JU063706	25	119	315	132	356	202	250		25	119	132	202	250	315	356	94	13	70	48	65	41	331		0.283988	0.0392749	0.21148	0.145015	0.196375	0.123867		0	0	0	0	0	0		0	0	0	0	0	0		0	0	0	0	0
JU062886	0	149	291	429	44	134	250		0	44	134	149	250	291	429	44	90	15	101	41	138	429		0.102564	0.20979	0.034965	0.235431	0.0955711	0.321678		0	0	0	0	0	0		0	0	0	0	0	0		0	0	0	0	0
JU062918	0	119	485	561	178	0	73		0	0	73	119	178	485	561	0	73	46	59	307	76	561		0	0.130125	0.0819964	0.105169	0.547237	0.135472		0	0	0	0	1	0		0	0	0	0	0	0		0	0	0	0	0
JU063938	282	179	291	66	623	202	29		29	66	179	202	282	291	623	37	113	23	80	9	332	594		0.0622896	0.190236	0.0387205	0.13468	0.0151515	0.558923		0	0	0	0	0	1		0	0	0	0	0	0		0	0	0	0	0
JU071673	154	149	267	132	222	202	220		132	149	154	202	220	222	267	17	5	48	18	2	45	135		0.125926	0.037037	0.355556	0.133333	0.0148148	0.333333		0	0	0	0	0	0		0	0	0	0	0	0		0	0	0	0	0
JU069086	822	119	0	198	44	202	44		0	44	44	119	198	202	822	44	0	75	79	4	620	822		0.053528	0	0.0912409	0.0961071	0.00486618	0.754258		0	0	0	0	0	1		0	0	0	0	0	1		0	0	0	0	0
JU068493	0	149	0	0	401	134	485		0	0	0	134	149	401	485	0	0	134	15	252	84	485		0	0	0.276289	0.0309278	0.519588	0.173196		0	0	0	0	1	0		0	0	0	0	0	0		0	0	0	0	0
JU064149	0	0	0	1617	0	0	0		0	0	0	0	0	0	1617	0	0	0	0	0	1617	1617		0	0	0	0	0	1		0	0	0	0	0	1		0	0	0	0	0	1		0	0	0	0	0
JU071569	0	239	413	594	0	134	58		0	0	58	134	239	413	594	0	58	76	105	174	181	594		0	0.0976431	0.127946	0.176768	0.292929	0.304714		0	0	0	0	0	0		0	0	0	0	0	0		0	0	0	0	0
JU063345	693	239	145	165	0	67	29		0	29	67	145	165	239	693	29	38	78	20	74	454	693		0.041847	0.0548341	0.112554	0.02886	0.106782	0.655123		0	0	0	0	0	1		0	0	0	0	0	1		0	0	0	0	0
JU068969	0	119	243	165	178	269	323		0	119	165	178	243	269	323	119	46	13	65	26	54	323		0.368421	0.142415	0.0402477	0.201238	0.0804954	0.167183		0	0	0	0	0	0		0	0	0	0	0	0		0	0	0	0	0
JU062997	256	239	170	264	89	134	162		89	134	162	170	239	256	264	45	28	8	69	17	8	175		0.257143	0.16	0.0457143	0.394286	0.0971429	0.0457143		0	0	0	0	0	0		0	0	0	0	0	0		0	0	0	0	0
JU065704	179	179	170	297	0	202	235		0	170	179	179	202	235	297	170	9	0	23	33	62	297		0.572391	0.030303	0	0.0774411	0.111111	0.208754		1	0	0	0	0	0		1	0	0	0	0	0		0	0	0	0	0
JU066193	25	179	97	165	178	336	338		25	97	165	178	179	336	338	72	68	13	1	157	2	313		0.230032	0.217252	0.0415335	0.00319489	0.501597	0.00638978		0	0	0	0	0	0		0	0	0	0	0	0		0	0	0	0	0
JU071748	0	359	194	627	401	0	0		0	0	0	194	359	401	627	0	0	194	165	42	226	627		0	0	0.30941	0.263158	0.0669856	0.360447		0	0	0	0	0	0		0	0	0	0	0	0		0	0	0	0	0
JU062692	0	29	0	33	0	67	662		0	0	0	29	33	67	662	0	0	29	4	34	595	662		0	0	0.0438066	0.0060423	0.0513595	0.898792		0	0	0	0	0	1		0	0	0	0	0	1		0	0	0	0	0
JU066151	205	329	72	132	222	67	235		67	72	132	205	222	235	329	5	60	73	17	13	94	262		0.019084	0.229008	0.278626	0.0648855	0.0496183	0.358779		0	0	0	0	0	0		0	0	0	0	0	0		0	0	0	0	0
JU065954	25	269	267	198	401	202	132		25	132	198	202	267	269	401	107	66	4	65	2	132	376		0.284574	0.175532	0.0106383	0.172872	0.00531915	0.351064		0	0	0	0	0	0		0	0	0	0	0	0		0	0	0	0	0
JU066125	462	269	72	264	133	134	58		58	72	133	134	264	269	462	14	61	1	130	5	193	404		0.0346535	0.15099	0.00247525	0.321782	0.0123762	0.477723		0	0	0	0	0	0		0	0	0	0	0	0		0	0	0	0	0
JU066403	0	89	121	33	579	538	250		0	33	89	121	250	538	579	33	56	32	129	288	41	579		0.0569948	0.0967185	0.0552677	0.222798	0.497409	0.0708117		0	0	0	0	0	0		0	0	0	0	0	0		0	0	0	0	0
scaffold64	308	119	291	264	267	67	58		58	67	119	264	267	291	308	9	52	145	3	24	17	250		0.036	0.208	0.58	0.012	0.096	0.068		0	0	1	0	0	0		0	0	1	0	0	0		0	0	0	0	0
JU063012	0	29	0	0	0	67	662		0	0	0	0	29	67	662	0	0	0	29	38	595	662		0	0	0	0.0438066	0.0574018	0.898792		0	0	0	0	0	1		0	0	0	0	0	1		0	0	0	0	0
JU064648	128	179	243	231	178	336	147		128	147	178	179	231	243	336	19	31	1	52	12	93	208		0.0913462	0.149038	0.00480769	0.25	0.0576923	0.447115		0	0	0	0	0	0		0	0	0	0	0	0		0	0	0	0	0
JU063690	0	149	97	33	178	0	485		0	0	33	97	149	178	485	0	33	64	52	29	307	485		0	0.0680412	0.131959	0.107216	0.0597938	0.63299		0	0	0	0	0	1		0	0	0	0	0	1		0	0	0	0	0
JU066244	0	359	170	0	178	807	176		0	0	170	176	178	359	807	0	170	6	2	181	448	807		0	0.210657	0.00743494	0.00247831	0.224287	0.555143		0	0	0	0	0	1		0	0	0	0	0	0		0	0	0	0	0
JU063641	0	89	24	0	133	67	574		0	0	24	67	89	133	574	0	24	43	22	44	441	574		0	0.0418118	0.0749129	0.0383275	0.0766551	0.768293		0	0	0	0	0	1		0	0	0	0	0	1		0	0	0	0	0
JU064338	0	0	0	0	0	0	692		0	0	0	0	0	0	692	0	0	0	0	0	692	692		0	0	0	0	0	1		0	0	0	0	0	1		0	0	0	0	0	1		0	0	0	0	0
JU066079	0	149	340	297	445	202	88		0	88	149	202	297	340	445	88	61	53	95	43	105	445		0.197753	0.137079	0.119101	0.213483	0.0966292	0.235955		0	0	0	0	0	0		0	0	0	0	0	0		0	0	0	0	0
JU062972	0	89	97	198	668	740	103		0	89	97	103	198	668	740	89	8	6	95	470	72	740		0.12027	0.0108108	0.00810811	0.128378	0.635135	0.0972973		0	0	0	0	1	0		0	0	0	0	1	0		0	0	0	0	0
JU066030	873	89	194	0	0	0	14		0	0	0	14	89	194	873	0	0	14	75	105	679	873		0	0	0.0160367	0.0859107	0.120275	0.777778		0	0	0	0	0	1		0	0	0	0	0	1		0	0	0	0	0
JU062762	25	89	194	33	44	67	456		25	33	44	67	89	194	456	8	11	23	22	105	262	431		0.0185615	0.025522	0.0533643	0.0510441	0.243619	0.607889		0	0	0	0	0	1		0	0	0	0	0	1		0	0	0	0	0
JU065666	334	149	48	66	178	269	235		48	66	149	178	235	269	334	18	83	29	57	34	65	286		0.0629371	0.29021	0.101399	0.199301	0.118881	0.227273		0	0	0	0	0	0		0	0	0	0	0	0		0	0	0	0	0
contig9409	1181	0	0	0	0	0	0		0	0	0	0	0	0	1181	0	0	0	0	0	1181	1181		0	0	0	0	0	1		0	0	0	0	0	1		0	0	0	0	0	1		0	0	0	0	0
JU062877	565	29	218	198	133	67	58		29	58	67	133	198	218	565	29	9	66	65	20	347	536		0.0541045	0.016791	0.123134	0.121269	0.0373134	0.647388		0	0	0	0	0	1		0	0	0	0	0	1		0	0	0	0	0
JU062867	0	89	97	99	267	202	397		0	89	97	99	202	267	397	89	8	2	103	65	130	397		0.224181	0.0201511	0.00503778	0.259446	0.163728	0.327456		0	0	0	0	0	0		0	0	0	0	0	0		0	0	0	0	0
JU062968	0	59	291	33	89	403	338		0	33	59	89	291	338	403	33	26	30	202	47	65	403		0.0818859	0.0645161	0.0744417	0.501241	0.116625	0.16129		0	0	0	0	0	0		0	0	0	0	0	0		0	0	0	0	0
JU063391	0	329	218	528	311	134	14		0	14	134	218	311	329	528	14	120	84	93	18	199	528		0.0265152	0.227273	0.159091	0.176136	0.0340909	0.376894		0	0	0	0	0	0		0	0	0	0	0	0		0	0	0	0	0
JU069365	0	448	291	0	311	202	132		0	0	132	202	291	311	448	0	132	70	89	20	137	448		0	0.294643	0.15625	0.198661	0.0446429	0.305804		0	0	0	0	0	0		0	0	0	0	0	0		0	0	0	0	0
JU071062	0	239	170	330	267	673	58		0	58	170	239	267	330	673	58	112	69	28	63	343	673		0.0861813	0.166419	0.102526	0.0416048	0.0936107	0.509658		0	0	0	0	0	1		0	0	0	0	0	0		0	0	0	0	0
JU063543	102	209	218	99	89	67	279		67	89	99	102	209	218	279	22	10	3	107	9	61	212		0.103774	0.0471698	0.0141509	0.504717	0.0424528	0.287736		0	0	0	0	0	0		0	0	0	0	0	0		0	0	0	0	0
JU071617	385	179	97	66	267	269	117		66	97	117	179	267	269	385	31	20	62	88	2	116	319		0.0971787	0.0626959	0.194357	0.275862	0.00626959	0.363636		0	0	0	0	0	0		0	0	0	0	0	0		0	0	0	0	0
JU065800	976	89	24	33	89	0	0		0	0	24	33	89	89	976	0	24	9	56	0	887	976		0	0.0245902	0.00922131	0.057377	0	0.908811		0	0	0	0	0	1		0	0	0	0	0	1		0	0	0	0	0
JU064498	0	0	0	0	0	0	662		0	0	0	0	0	0	662	0	0	0	0	0	662	662		0	0	0	0	0	1		0	0	0	0	0	1		0	0	0	0	0	1		0	0	0	0	0
JU062700	77	89	194	0	0	0	456		0	0	0	77	89	194	456	0	0	77	12	105	262	456		0	0	0.16886	0.0263158	0.230263	0.574561		0	0	0	0	0	1		0	0	0	0	0	1		0	0	0	0	0
JU070095	0	209	340	297	178	0	162		0	0	162	178	209	297	340	0	162	16	31	88	43	340		0	0.476471	0.0470588	0.0911765	0.258824	0.126471		0	0	0	0	0	0		0	0	0	0	0	0		0	0	0	0	0
JU063889	0	59	194	66	133	336	368		0	59	66	133	194	336	368	59	7	67	61	142	32	368		0.160326	0.0190217	0.182065	0.165761	0.38587	0.0869565		0	0	0	0	0	0		0	0	0	0	0	0		0	0	0	0	0
JU063570	411	119	97	33	44	134	235		33	44	97	119	134	235	411	11	53	22	15	101	176	378		0.0291005	0.140212	0.0582011	0.0396825	0.267196	0.465608		0	0	0	0	0	0		0	0	0	0	0	0		0	0	0	0	0
JU071573	0	59	24	0	0	67	589		0	0	0	24	59	67	589	0	0	24	35	8	522	589		0	0	0.040747	0.0594228	0.0135823	0.886248		0	0	0	0	0	1		0	0	0	0	0	1		0	0	0	0	0
JU065708	77	359	121	165	267	336	117		77	117	121	165	267	336	359	40	4	44	102	69	23	282		0.141844	0.0141844	0.156028	0.361702	0.244681	0.0815603		0	0	0	0	0	0		0	0	0	0	0	0		0	0	0	0	0
JU064340	51	59	121	132	222	134	353		51	59	121	132	134	222	353	8	62	11	2	88	131	302		0.0264901	0.205298	0.0364238	0.00662252	0.291391	0.433775		0	0	0	0	0	0		0	0	0	0	0	0		0	0	0	0	0
JU069968	154	389	170	132	89	134	147		89	132	134	147	154	170	389	43	2	13	7	16	219	300		0.143333	0.00666667	0.0433333	0.0233333	0.0533333	0.73		0	0	0	0	0	1		0	0	0	0	0	1		0	0	0	0	0
JU065201	25	329	145	330	133	202	147		25	133	145	147	202	329	330	108	12	2	55	127	1	305		0.354098	0.0393443	0.00655738	0.180328	0.416393	0.00327869		0	0	0	0	0	0		0	0	0	0	0	0		0	0	0	0	0
JU068324	1027	59	0	0	89	0	0		0	0	0	0	59	89	1027	0	0	0	59	30	938	1027		0	0	0	0.0574489	0.0292113	0.91334		0	0	0	0	0	1		0	0	0	0	0	1		0	0	0	0	0
JU069274	0	29	97	132	490	471	250		0	29	97	132	250	471	490	29	68	35	118	221	19	490		0.0591837	0.138776	0.0714286	0.240816	0.45102	0.0387755		0	0	0	0	0	0		0	0	0	0	0	0		0	0	0	0	0
JU065015	0	239	121	66	222	134	323		0	66	121	134	222	239	323	66	55	13	88	17	84	323		0.204334	0.170279	0.0402477	0.272446	0.0526316	0.260062		0	0	0	0	0	0		0	0	0	0	0	0		0	0	0	0	0
JU063403	77	29	145	66	89	269	382		29	66	77	89	145	269	382	37	11	12	56	124	113	353		0.104816	0.0311615	0.0339943	0.15864	0.351275	0.320113		0	0	0	0	0	0		0	0	0	0	0	0		0	0	0	0	0
JU062963	0	59	145	66	222	202	382		0	59	66	145	202	222	382	59	7	79	57	20	160	382		0.15445	0.0183246	0.206806	0.149215	0.052356	0.418848		0	0	0	0	0	0		0	0	0	0	0	0		0	0	0	0	0
JU063252	0	209	121	132	133	471	265		0	121	132	133	209	265	471	121	11	1	76	56	206	471		0.2569	0.0233546	0.00212314	0.161359	0.118896	0.437367		0	0	0	0	0	0		0	0	0	0	0	0		0	0	0	0	0
JU071330	334	209	194	99	222	134	88		88	99	134	194	209	222	334	11	35	60	15	13	112	246		0.0447154	0.142276	0.243902	0.0609756	0.0528455	0.455285		0	0	0	0	0	0		0	0	0	0	0	0		0	0	0	0	0
JU071665	179	179	267	198	222	67	117		67	117	179	179	198	222	267	50	62	0	19	24	45	200		0.25	0.31	0	0.095	0.12	0.225		0	0	0	0	0	0		0	0	0	0	0	0		0	0	0	0	0
JU065258	77	239	243	33	44	0	294		0	33	44	77	239	243	294	33	11	33	162	4	51	294		0.112245	0.037415	0.112245	0.55102	0.0136054	0.173469		0	0	0	1	0	0		0	0	0	0	0	0		0	0	0	0	0
JU062953	0	89	194	99	44	336	338		0	44	89	99	194	336	338	44	45	10	95	142	2	338		0.130178	0.133136	0.0295858	0.281065	0.420118	0.00591716		0	0	0	0	0	0		0	0	0	0	0	0		0	0	0	0	0
JU062759	25	119	170	132	133	269	294		25	119	132	133	170	269	294	94	13	1	37	99	25	269		0.349442	0.0483271	0.00371747	0.137546	0.36803	0.0929368		0	0	0	0	0	0		0	0	0	0	0	0		0	0	0	0	0
JU066750	25	269	388	132	222	67	103		25	67	103	132	222	269	388	42	36	29	90	47	119	363		0.115702	0.0991736	0.0798898	0.247934	0.129477	0.327824		0	0	0	0	0	0		0	0	0	0	0	0		0	0	0	0	0
JU065257	51	299	145	297	401	67	88		51	67	88	145	297	299	401	16	21	57	152	2	102	350		0.0457143	0.06	0.162857	0.434286	0.00571429	0.291429		0	0	0	0	0	0		0	0	0	0	0	0		0	0	0	0	0
JU062786	128	209	340	132	89	0	162		0	89	128	132	162	209	340	89	39	4	30	47	131	340		0.261765	0.114706	0.0117647	0.0882353	0.138235	0.385294		0	0	0	0	0	0		0	0	0	0	0	0		0	0	0	0	0
JU062919	0	0	48	0	133	0	559		0	0	0	0	48	133	559	0	0	0	48	85	426	559		0	0	0	0.0858676	0.152057	0.762075		0	0	0	0	0	1		0	0	0	0	0	1		0	0	0	0	0
JU065303	77	119	121	165	133	67	323		67	77	119	121	133	165	323	10	42	2	12	32	158	256		0.0390625	0.164062	0.0078125	0.046875	0.125	0.617188		0	0	0	0	0	1		0	0	0	0	0	1		0	0	0	0	0
JU062978	0	89	388	66	579	605	0		0	0	66	89	388	579	605	0	66	23	299	191	26	605		0	0.109091	0.0380165	0.494215	0.315702	0.0429752		0	0	0	0	0	0		0	0	0	0	0	0		0	0	0	0	0
JU066091	0	209	218	297	133	67	206		0	67	133	206	209	218	297	67	66	73	3	9	79	297		0.225589	0.222222	0.245791	0.010101	0.030303	0.265993		0	0	0	0	0	0		0	0	0	0	0	0		0	0	0	0	0
JU071657	0	149	0	0	133	67	500		0	0	0	67	133	149	500	0	0	67	66	16	351	500		0	0	0.134	0.132	0.032	0.702		0	0	0	0	0	1		0	0	0	0	0	1		0	0	0	0	0
JU065504	0	29	24	0	44	134	559		0	0	24	29	44	134	559	0	24	5	15	90	425	559		0	0.0429338	0.00894454	0.0268336	0.161002	0.760286		0	0	0	0	0	1		0	0	0	0	0	1		0	0	0	0	0
JU063020	205	119	170	33	89	202	265		33	89	119	170	202	205	265	56	30	51	32	3	60	232		0.241379	0.12931	0.219828	0.137931	0.012931	0.258621		0	0	0	0	0	0		0	0	0	0	0	0		0	0	0	0	0
JU063939	51	359	121	33	133	134	265		33	51	121	133	134	265	359	18	70	12	1	131	94	326		0.0552147	0.214724	0.0368098	0.00306748	0.40184	0.288344		0	0	0	0	0	0		0	0	0	0	0	0		0	0	0	0	0
JU064626	0	119	24	99	0	0	515		0	0	0	24	99	119	515	0	0	24	75	20	396	515		0	0	0.0466019	0.145631	0.038835	0.768932		0	0	0	0	0	1		0	0	0	0	0	1		0	0	0	0	0
JU067638	0	59	0	0	44	67	574		0	0	0	44	59	67	574	0	0	44	15	8	507	574		0	0	0.0766551	0.0261324	0.0139373	0.883275		0	0	0	0	0	1		0	0	0	0	0	1		0	0	0	0	0
JU062706	0	0	24	0	44	0	589		0	0	0	0	24	44	589	0	0	0	24	20	545	589		0	0	0	0.040747	0.0339559	0.925297		0	0	0	0	0	1		0	0	0	0	0	1		0	0	0	0	0
JU071742	0	0	0	33	44	0	589		0	0	0	0	33	44	589	0	0	0	33	11	545	589		0	0	0	0.0560272	0.0186757	0.925297		0	0	0	0	0	1		0	0	0	0	0	1		0	0	0	0	0
JU062859	334	149	97	264	178	67	103		67	97	103	149	178	264	334	30	6	46	29	86	70	267		0.11236	0.0224719	0.172285	0.108614	0.322097	0.262172		0	0	0	0	0	0		0	0	0	0	0	0		0	0	0	0	0
JU063171	0	0	48	0	0	0	589		0	0	0	0	0	48	589	0	0	0	0	48	541	589		0	0	0	0	0.0814941	0.918506		0	0	0	0	0	1		0	0	0	0	0	1		0	0	0	0	0
JU064118	385	119	121	99	44	67	191		44	67	99	119	121	191	385	23	32	20	2	70	194	341		0.0674487	0.0938416	0.058651	0.0058651	0.205279	0.568915		0	0	0	0	0	1		0	0	0	0	0	1		0	0	0	0	0
JU066634	0	149	437	264	178	471	0		0	0	149	178	264	437	471	0	149	29	86	173	34	471		0	0.316348	0.0615711	0.18259	0.367304	0.0721868		0	0	0	0	0	0		0	0	0	0	0	0		0	0	0	0	0
JU063807	0	179	170	132	133	67	309		0	67	132	133	170	179	309	67	65	1	37	9	130	309		0.216828	0.210356	0.00323625	0.119741	0.0291262	0.420712		0	0	0	0	0	0		0	0	0	0	0	0		0	0	0	0	0
JU063213	0	0	0	0	0	0	618		0	0	0	0	0	0	618	0	0	0	0	0	618	618		0	0	0	0	0	1		0	0	0	0	0	1		0	0	0	0	0	1		0	0	0	0	0
JU070516	0	0	0	0	0	0	618		0	0	0	0	0	0	618	0	0	0	0	0	618	618		0	0	0	0	0	1		0	0	0	0	0	1		0	0	0	0	0	1		0	0	0	0	0
JU064130	179	359	194	264	222	134	0		0	134	179	194	222	264	359	134	45	15	28	42	95	359		0.373259	0.125348	0.0417827	0.0779944	0.116992	0.264624		0	0	0	0	0	0		0	0	0	0	0	0		0	0	0	0	0
JU065231	77	179	97	66	133	740	191		66	77	97	133	179	191	740	11	20	36	46	12	549	674		0.0163205	0.0296736	0.0534125	0.0682493	0.0178042	0.81454		0	0	0	0	0	1		0	0	0	0	0	1		0	0	0	0	0
JU062776	668	179	48	198	89	0	0		0	0	48	89	179	198	668	0	48	41	90	19	470	668		0	0.0718563	0.0613772	0.134731	0.0284431	0.703593		0	0	0	0	0	1		0	0	0	0	0	1		0	0	0	0	0
JU063250	0	59	24	0	0	673	427		0	0	0	24	59	427	673	0	0	24	35	368	246	673		0	0	0.0356612	0.0520059	0.546805	0.365527		0	0	0	0	1	0		0	0	0	0	0	0		0	0	0	0	0
JU064104	0	179	194	165	222	605	132		0	132	165	179	194	222	605	132	33	14	15	28	383	605		0.218182	0.0545455	0.0231405	0.0247934	0.046281	0.633058		0	0	0	0	0	1		0	0	0	0	0	1		0	0	0	0	0
JU062957	0	29	0	0	44	67	574		0	0	0	29	44	67	574	0	0	29	15	23	507	574		0	0	0.0505226	0.0261324	0.0400697	0.883275		0	0	0	0	0	1		0	0	0	0	0	1		0	0	0	0	0
JU071683	0	0	24	0	0	134	574		0	0	0	0	24	134	574	0	0	0	24	110	440	574		0	0	0	0.0418118	0.191638	0.766551		0	0	0	0	0	1		0	0	0	0	0	1		0	0	0	0	0
JU068395	179	359	145	198	44	67	132		44	67	132	145	179	198	359	23	65	13	34	19	161	315		0.0730159	0.206349	0.0412698	0.107937	0.0603175	0.511111		0	0	0	0	0	1		0	0	0	0	0	0		0	0	0	0	0
JU070794	0	29	437	132	222	67	191		0	29	67	132	191	222	437	29	38	65	59	31	215	437		0.0663616	0.0869565	0.148741	0.135011	0.0709382	0.491991		0	0	0	0	0	0		0	0	0	0	0	0		0	0	0	0	0
[truncated: 854 more rows]
[truncated: 2 more columns]
